# Supplementary material for: The circ_0002538/miR-138-5p/plasmolipin axis regulates Schwann cell migration and myelination in diabetic peripheral neuropathy
Source: PubMed Central journal article supplement — Neural Regen Res. 2022 Oct 11;18(7):1591–600. doi: 10.4103/1673-5374.355979 (PMC10075099; doi:10.4103/1673-5374.355979), 2022-10-11
Supplement: NRR-18-1591_Suppl1.pdf [file NRR-18-1591_Suppl1.pdf]

**Additional Table 4 The differentially expressed proteins analyzed in this study were selected from the results of protein profiling analysis**

| Accession | Gene      | Description                                                                                               | Coverage  | # Peptides | # PSMs | # Unique | # AAs | MW [kDa] | calc. pI | Abundanc | Abundanc | Abundanc | Abundanc | Abundanc | Abundanc | Average A | Average B | A/B       | P value   |
|-----------|-----------|-----------------------------------------------------------------------------------------------------------|-----------|------------|--------|----------|-------|----------|----------|----------|----------|----------|----------|----------|----------|-----------|-----------|-----------|-----------|
| P15559    | NQO1      | NAD(P)H dehydrogenase [quinone] 1 OS=Homo sapiens<br>OX=9606 GN=NQO1 PE=1 SV=1                            | 12.408759 | 4          | 5      | 4        | 274   | 30.848   | 8.88     | 151.8    | 111.3    | 157.9    | 52.3     | 73.4     | 53.3     | 140.33333 | 59.666667 | 2.3519553 | 0.0075304 |
| P08519    | LPA       | Apolipoprotein(a) OS=Homo sapiens OX=9606 GN=LPA PE=1<br>SV=1                                             | 25.505717 | 4          | 7      | 4        | 4548  | 500.995  | 5.88     | 95.8     | 161      | 161.7    | 53.3     | 60.3     | 67.9     | 139.5     | 60.5      | 2.3057851 | 0.0237999 |
| Q99543    | DNAJC2    | DnaJ homolog subfamily C member 2 OS=Homo sapiens<br>OX=9606 GN=DNAJC2 PE=1 SV=4                          | 7.2463768 | 3          | 3      | 3        | 621   | 71.952   | 8.7      | 94.2     | 149.8    | 169.9    | 58.1     | 48.3     | 79.8     | 137.96667 | 62.066667 | 2.2228786 | 0.0361947 |
| Q9BXJ4    | C1QTNF3   | Complement C1q tumor necrosis factor-related protein 3<br>OS=Homo sapiens OX=9606 GN=C1QTNF3 PE=1 SV=1    | 2.8455285 | 1          | 1      | 1        | 246   | 26.977   | 6.52     | 128.3    | 102.2    | 179.1    | 70.2     | 58.5     | 61.8     | 136.53333 | 63.5      | 2.1501312 | 0.0329964 |
| P09455    | RBP1      | Retinol-binding protein 1 OS=Homo sapiens OX=9606<br>GN=RBP1 PE=1 SV=2                                    | 59.259259 | 7          | 9      | 7        | 135   | 15.84    | 5.11     | 116.8    | 168.7    | 121.4    | 55       | 53.9     | 84.2     | 135.63333 | 64.366667 | 2.1071983 | 0.0210685 |
| P04732    | MT1E      | Metallothionein-1E OS=Homo sapiens OX=9606 GN=MT1E<br>PE=1 SV=1                                           | 65.57377  | 3          | 4      | 2        | 61    | 6.009    | 7.96     | 157.5    | 136      | 113.1    | 56.6     | 57.8     | 79       | 135.53333 | 64.466667 | 2.1023785 | 0.0085141 |
| P22676    | CALB2     | Calretinin OS=Homo sapiens OX=9606 GN=CALB2 PE=2<br>Apolipoprotein C-III OS=Homo sapiens OX=9606 GN=APOC3 | 30.627306 | 8          | 13     | 8        | 271   | 31.52    | 5.15     | 98.8     | 146.5    | 152.4    | 72.1     | 57.6     | 72.6     | 132.56667 | 67.433333 | 1.9658922 | 0.0210813 |
| P02656    | APOC3     | 1,2-dihydroxy-3-keto-5-methylthiopentene dioxxygenase<br>PE=1 SV=1                                        | 23.232323 | 2          | 3      | 2        | 99    | 10.845   | 5.41     | 134.6    | 104.4    | 151.5    | 79       | 47.8     | 82.8     | 130.16667 | 69.866667 | 1.8630725 | 0.0270302 |
| Q9BV57    | ADI1      | OS=Homo sapiens OX=9606 GN=ADI1 PE=1 SV=1<br>HLA class II histocompatibility antigen, DR alpha chain      | 29.050279 | 4          | 4      | 4        | 179   | 21.485   | 5.68     | 131.2    | 99.9     | 157.6    | 74.5     | 73.5     | 63.3     | 129.56667 | 70.433333 | 1.8395646 | 0.0256541 |
| P01903    | HLA-DRA   | OS=Homo sapiens OX=9606 GN=HLA-DRA PE=1 SV=1<br>Metallothionein-2 OS=Homo sapiens OX=9606 GN=MT2A         | 44.88189  | 9          | 16     | 8        | 254   | 28.589   | 5        | 149.7    | 111      | 122.2    | 76.6     | 52.1     | 88.5     | 127.63333 | 72.4      | 1.7628913 | 0.0245755 |
| P02795    | MT2A      | PE=1 SV=1<br>Tumor necrosis factor receptor superfamily member 16                                         | 65.57377  | 3          | 6      | 1        | 61    | 6.037    | 7.83     | 118.8    | 133.5    | 122      | 65.7     | 64.2     | 95.9     | 124.76667 | 75.266667 | 1.6576616 | 0.011688  |
| P08138    | NGFR      | OS=Homo sapiens OX=9606 GN=NGFR PE=1 SV=1<br>N-acetylgalactosamine kinase OS=Homo sapiens OX=9606         | 24.355972 | 7          | 14     | 7        | 427   | 45.154   | 4.7      | 137.2    | 123.1    | 113.5    | 73.5     | 71.2     | 81.4     | 124.6     | 75.366667 | 1.6532508 | 0.0028472 |
| Q01415    | GALK2     | GN=GALK2 PE=1 SV=1<br>Aspartoacylase OS=Homo sapiens OX=9606 GN=ASPA PE=1                                 | 9.1703057 | 3          | 5      | 3        | 458   | 50.346   | 6.61     | 132.7    | 115.2    | 125.7    | 59       | 76.3     | 91.1     | 124.53333 | 75.466667 | 1.6501767 | 0.0097458 |
| P45381    | ASPA      | SV=1<br>GDNF family receptor alpha-1 OS=Homo sapiens OX=9606                                              | 49.840256 | 10         | 14     | 10       | 313   | 35.712   | 6.52     | 141.1    | 105.9    | 122.7    | 84.5     | 72       | 73.7     | 123.23333 | 76.733333 | 1.6059948 | 0.0129603 |
| P56159    | GFRA1     | GN=GFRA1 PE=2 SV=2<br>Zinc-alpha-2-glycoprotein OS=Homo sapiens OX=9606                                   | 19.354839 | 10         | 12     | 10       | 465   | 51.422   | 7.91     | 129.3    | 128.1    | 109.4    | 73       | 66.8     | 93.4     | 122.26667 | 77.733333 | 1.5728988 | 0.0124083 |
| P25311    | AZGP1     | GN=AZGP1 PE=1 SV=2<br>HLA class II histocompatibility antigen, DP alpha 1 chain                           | 45.637584 | 15         | 28     | 15       | 298   | 34.237   | 6.05     | 133.2    | 123.8    | 109.6    | 85.5     | 55.6     | 92.2     | 122.2     | 77.766667 | 1.5713673 | 0.0279912 |
| P20036    | HLA-DPA1  | OS=Homo sapiens OX=9606 GN=HLA-DPA1 PE=1 SV=1<br>Phylloquinone omega-hydroxylase CYP4F11 OS=Homo          | 17.692308 | 3          | 7      | 3        | 260   | 29.362   | 5.21     | 135.2    | 113.1    | 117.3    | 75.8     | 71.5     | 87.2     | 121.86667 | 78.166667 | 1.5590618 | 0.0060665 |
| Q9HBI6    | CYP4F11   | sapiens OX=9606 GN=CYP4F11 PE=1 SV=3<br>Pyroglutamyl-peptidase 1 OS=Homo sapiens OX=9606                  | 2.2900763 | 1          | 1      | 1        | 524   | 60.107   | 6.73     | 123.1    | 102      | 138.3    | 80.2     | 71.4     | 85       | 121.13333 | 78.866667 | 1.5359256 | 0.0198435 |
| Q9NXJ5    | PGPEP1    | GN=PGPEP1 PE=1 SV=1<br>Folate receptor beta OS=Homo sapiens OX=9606 GN=FOLR2                              | 3.8277512 | 1          | 2      | 1        | 209   | 23.123   | 5.9      | 112.5    | 110.6    | 139.6    | 76.2     | 67.2     | 94       | 120.9     | 79.133333 | 1.5278012 | 0.0269447 |
| P14207    | FOLR2     | PE=1 SV=4<br>14 kDa phosphohistidine phosphatase OS=Homo sapiens                                          | 22.352941 | 5          | 9      | 5        | 255   | 29.26    | 7.53     | 131.9    | 115.7    | 115      | 90.6     | 74.7     | 72.1     | 120.86667 | 79.133333 | 1.5273799 | 0.0064258 |
| Q9NRX4    | PHPT1     | OX=9606 GN=PHPT1 PE=1 SV=1<br>Glutathione S-transferase Mu 4 OS=Homo sapiens OX=9606                      | 64        | 7          | 14     | 7        | 125   | 13.824   | 6.07     | 112.7    | 115.7    | 133.7    | 77.6     | 73.8     | 86.5     | 120.7     | 79.3      | 1.5220681 | 0.0054138 |
| Q03013    | GSTM4     | GN=GSTM4 PE=1 SV=3<br>Diphosphoinositol polyphosphate phosphohydrolase NUDT4B                             | 52.293578 | 10         | 18     | 3        | 218   | 25.545   | 5.9      | 119.1    | 102.6    | 138.7    | 75.1     | 92.3     | 72.2     | 120.13333 | 79.866667 | 1.5041736 | 0.0297241 |
| A0A024RBC | NUDT4B    | OS=Homo sapiens OX=9606 GN=NUDT4B PE=3 SV=1<br>Extracellular matrix protein 2 OS=Homo sapiens OX=9606     | 29.834254 | 4          | 5      | 3        | 181   | 20.421   | 6.35     | 112.6    | 125.9    | 121.5    | 75.9     | 74.4     | 89.7     | 120       | 80        | 1.5       | 0.0030538 |
| Q94769    | ECM2      | GN=ECM2 PE=2 SV=1                                                                                         | 2.8612303 | 2          | 2      | 2        | 699   | 79.739   | 5.41     | 106.1    | 109.4    | 144.1    | 85.5     | 79.1     | 75.8     | 119.86667 | 80.133333 | 1.4958403 | 0.0334405 |
| Q8N3F0    | MTURN     | Maturin OS=Homo sapiens OX=9606 GN=MTURN PE=1<br>Bola-like protein 2 OS=Homo sapiens OX=9606 GN=BOLA2     | 28.244275 | 3          | 5      | 3        | 131   | 14.916   | 4.17     | 134.4    | 110.2    | 114.6    | 88.2     | 67.5     | 85.1     | 119.73333 | 80.266667 | 1.4916944 | 0.0160166 |
| Q9H3K6    | BOLA2     | PE=1 SV=1<br>Triosephosphate isomerase OS=Homo sapiens OX=9606                                            | 59.302326 | 4          | 4      | 4        | 86    | 10.11    | 6.52     | 128.4    | 107.2    | 123.5    | 72.3     | 67.8     | 100.8    | 119.7     | 80.3      | 1.49066   | 0.0316528 |
| P60174    | TPI1      | GN=TPI1 PE=1 SV=3<br>Selenoprotein P OS=Homo sapiens OX=9606 GN=SELENOP                                   | 76.223776 | 18         | 62     | 18       | 286   | 30.772   | 5.92     | 117.8    | 104.4    | 136.5    | 83.3     | 64.4     | 93.6     | 119.56667 | 80.433333 | 1.4865313 | 0.0363574 |
| P49908    | SELENOP   | PE=1 SV=3<br>Diphosphoinositol polyphosphate phosphohydrolase 1                                           | 9.7112861 | 4          | 5      | 4        | 381   | 43.156   | 7.87     | 132.2    | 121.6    | 104.8    | 83.6     | 78.4     | 79.3     | 119.53333 | 80.433333 | 1.4861169 | 0.0086142 |
| O95989    | NUDT3     | OS=Homo sapiens OX=9606 GN=NUDT3 PE=1 SV=1<br>Complement component C7 OS=Homo sapiens OX=9606             | 39.534884 | 6          | 11     | 5        | 172   | 19.459   | 6.34     | 135.2    | 104.2    | 119      | 85.5     | 71.1     | 84.9     | 119.46667 | 80.5      | 1.484058  | 0.0182495 |
| P10643    | C7        | GN=C7 PE=1 SV=2<br>Dystrophia myotonica WD repeat-containing protein OS=Homo                              | 20.521945 | 16         | 24     | 15       | 843   | 93.457   | 6.48     | 110      | 128.3    | 120.1    | 95.8     | 69.9     | 75.9     | 119.46667 | 80.533333 | 1.4834437 | 0.0146059 |
| Q09019    | DMWD      | sapiens OX=9606 GN=DMWD PE=1 SV=3                                                                         | 2.6706231 | 1          | 2      | 1        | 674   | 70.394   | 7.24     | 130.2    | 124.3    | 102.9    | 77.7     | 68.9     | 96.1     | 119.13333 | 80.9      | 1.4725999 | 0.0295073 |
| A0MZ66    | SHTN1     | Shootin-1 OS=Homo sapiens OX=9606 GN=SHTN1 PE=1<br>Immunoglobulin lambda variable 10-54 OS=Homo sapiens   | 19.175911 | 12         | 15     | 12       | 631   | 71.596   | 5.33     | 112.6    | 128.6    | 115.2    | 73.6     | 71.1     | 98.9     | 118.8     | 81.2      | 1.4630542 | 0.0208835 |
| A0A075B6  | IGLV10-54 | OX=9606 GN=IGLV10-54 PE=3 SV=1<br>Pleckstrin homology domain-containing family G member 3                 | 9.4017094 | 1          | 1      | 1        | 117   | 12.387   | 8.03     | 138.7    | 112.8    | 104.7    | 71.4     | 78.9     | 93.4     | 118.73333 | 81.233333 | 1.4616332 | 0.0364061 |
| A1L390    | PLEKHG3   | OS=Homo sapiens OX=9606 GN=PLEKHG3 PE=1 SV=1<br>Peptidyl-prolyl cis-trans isomerase D OS=Homo sapiens     | 1.3945857 | 1          | 1      | 1        | 1219  | 134.329  | 6.55     | 118.6    | 108.5    | 127.7    | 78.7     | 76.4     | 90.1     | 118.26667 | 81.733333 | 1.4469821 | 0.0063589 |
| Q08752    | PPID      | OX=9606 GN=PPID PE=1 SV=3<br>Ribonuclease pancreatic OS=Homo sapiens OX=9606                              | 7.027027  | 3          | 3      | 3        | 370   | 40.738   | 7.21     | 109.2    | 121.9    | 122.7    | 80.9     | 62       | 103.2    | 117.93333 | 82.033333 | 1.437627  | 0.0473338 |
| P07998    | RNASE1    | GN=RNASE1 PE=1 SV=4                                                                                       | 34.615385 | 3          | 3      | 3        | 156   | 17.633   | 8.79     | 125.3    | 100.5    | 127.5    | 87.7     | 84       | 75       | 117.76667 | 82.233333 | 1.4321038 | 0.0197207 |
| Q6EMK4    | VASN      | Vasorin OS=Homo sapiens OX=9606 GN=VASN PE=1 SV=1<br>Metallothionein-1X OS=Homo sapiens OX=9606 GN=MT1X   | 4.6062407 | 2          | 3      | 2        | 673   | 71.668   | 7.39     | 115.3    | 115.8    | 122.2    | 90.1     | 69.9     | 86.8     | 117.76667 | 82.266667 | 1.4315235 | 0.0058966 |
| P80297    | MT1X      | PE=1 SV=1                                                                                                 | 65.57377  | 3          | 3      | 1        | 61    | 6.063    | 7.96     | 104      | 123.1    | 125.7    | 80.1     | 85.1     | 82       | 117.6     | 82.4      | 1.4271845 | 0.0073214 |
| P21741    | MDK       | Midkine OS=Homo sapiens OX=9606 GN=MDK PE=1 SV=1<br>Cellular nucleic acid-binding protein OS=Homo sapiens | 41.958042 | 6          | 7      | 6        | 143   | 15.575   | 9.79     | 106.4    | 136.1    | 110.2    | 86.9     | 80.6     | 79.8     | 117.56667 | 82.433333 | 1.426203  | 0.0215688 |
| P62633    | CNBP      | OX=9606 GN=CNBP PE=1 SV=1<br>Coactosin-like protein OS=Homo sapiens OX=9606                               | 9.6045198 | 2          | 2      | 2        | 177   | 19.45    | 7.71     | 121.7    | 102.4    | 127.7    | 73.6     | 73       | 101.6    | 117.26667 | 82.733333 | 1.4174053 | 0.0466014 |
| Q14019    | COTL1     | GN=COTL1 PE=1 SV=3<br>Xaa-Pro dipeptidase OS=Homo sapiens OX=9606 GN=PEPD                                 | 63.380282 | 9          | 22     | 9        | 142   | 15.935   | 5.67     | 122.5    | 109.7    | 118.8    | 75.4     | 69.3     | 104.3    | 117       | 83        | 1.4096386 | 0.0411139 |
| P12955    | PEPD      | PE=1 SV=3<br>Integrin beta-8 OS=Homo sapiens OX=9606 GN=ITGB8 PE=2                                        | 16.8357   | 8          | 9      | 8        | 493   | 54.513   | 6        | 104.2    | 123      | 123.4    | 74.3     | 75.9     | 99.2     | 116.86667 | 83.133333 | 1.4057739 | 0.0301011 |
| P26012    | ITGB8     | SV=1<br>Adenosine kinase OS=Homo sapiens OX=9606 GN=ADK                                                   | 22.236671 | 15         | 20     | 15       | 769   | 85.575   | 7.25     | 132.1    | 116.7    | 101.8    | 75.6     | 74.9     | 99       | 116.86667 | 83.166667 | 1.4052104 | 0.0461132 |
| P55263    | ADK       | PE=1 SV=2<br>N-acetylglucosamine 2-epimerase OS=Homo sapiens OX=9606                                      | 39.779006 | 12         | 17     | 12       | 362   | 40.52    | 6.7      | 112.5    | 109.8    | 128.1    | 84.5     | 71.8     | 93.4     | 116.8     | 83.233333 | 1.4032839 | 0.0166627 |
| P51606    | RENBP     | GN=RENBP PE=1 SV=2                                                                                        | 18.032787 | 9          | 14     | 9        | 427   | 48.799   | 6.37     | 121.8    | 99.3     | 129      | 79.7     | 73.9     | 96.3     | 116.7     | 83.3      | 1.4009604 | 0.0404726 |

|        |          |                                                                                                             |           |    |     |    |      |         |      |       |       |       |      |      |       |           |           |           |           |
|--------|----------|-------------------------------------------------------------------------------------------------------------|-----------|----|-----|----|------|---------|------|-------|-------|-------|------|------|-------|-----------|-----------|-----------|-----------|
| O95336 | PGLS     | 6-phosphogluconolactonase OS=Homo sapiens OX=9606<br>GN=PGLS PE=1 SV=2                                      | 53.488372 | 10 | 16  | 10 | 258  | 27.53   | 6.05 | 120   | 117.4 | 112.5 | 82.6 | 73.6 | 93.8  | 116.63333 | 83.333333 | 1.3996    | 0.0059486 |
| O00499 | BIN1     | Myc box-dependent-interacting protein 1 OS=Homo sapiens<br>OX=9606 GN=BIN1 PE=1 SV=1                        | 36.593592 | 17 | 30  | 15 | 593  | 64.659  | 5.06 | 120   | 104.2 | 125.4 | 79.9 | 83.4 | 87.2  | 116.53333 | 83.5      | 1.3956088 | 0.0078743 |
| O75223 | GGCT     | Gamma-glutamylcyclotransferase OS=Homo sapiens<br>OX=9606 GN=GGCT PE=1 SV=1                                 | 35.106383 | 5  | 10  | 5  | 188  | 20.994  | 5.14 | 115.5 | 115.6 | 118.4 | 81.6 | 74.7 | 94.2  | 116.5     | 83.5      | 1.3952096 | 0.0046755 |
| Q14005 | IL16     | Pro-interleukin-16 OS=Homo sapiens OX=9606 GN=IL16<br>PE=1 SV=4                                             | 1.7267267 | 2  | 2   | 2  | 1332 | 141.665 | 8.06 | 111.8 | 130.2 | 106.8 | 86.2 | 72.7 | 92.3  | 116.26667 | 83.733333 | 1.388535  | 0.0238743 |
| Q93091 | RNASE6   | Ribonuclease K6 OS=Homo sapiens OX=9606 GN=RNASE6<br>PE=1 SV=2                                              | 7.3333333 | 1  | 1   | 1  | 150  | 17.185  | 8.76 | 121.6 | 113.8 | 113.3 | 81.1 | 74.8 | 95.3  | 116.23333 | 83.733333 | 1.3881369 | 0.0080387 |
| O75884 | RBBP9    | Putative hydrolase RBBP9 OS=Homo sapiens OX=9606<br>GN=RBBP9 PE=1 SV=2                                      | 24.731183 | 3  | 3   | 3  | 186  | 20.986  | 6.2  | 116   | 98.4  | 134   | 81.7 | 81   | 88.9  | 116.13333 | 83.866667 | 1.3847377 | 0.0380647 |
| P42330 | AKR1C3   | Aldo-keto reductase family 1 member C3 OS=Homo sapiens<br>OX=9606 GN=AKR1C3 PE=1 SV=4                       | 31.578947 | 8  | 12  | 3  | 323  | 36.83   | 7.94 | 108.8 | 110.5 | 128.9 | 87.4 | 69.3 | 95.1  | 116.06667 | 83.933333 | 1.3828435 | 0.0324306 |
| Q96C86 | DCPS     | m7GpppX diphosphatase OS=Homo sapiens OX=9606<br>GN=DCPS PE=1 SV=2                                          | 27.596439 | 8  | 9   | 8  | 337  | 38.585  | 6.38 | 124   | 113.6 | 110.6 | 83.2 | 66.9 | 101.8 | 116.06667 | 83.966667 | 1.3822946 | 0.0418281 |
| Q9NRG1 | PRTFDC1  | Phosphoribosyltransferase domain-containing protein 1<br>OS=Homo sapiens OX=9606 GN=PRTFDC1 PE=1 SV=1       | 4.4444444 | 1  | 1   | 1  | 225  | 25.657  | 6.15 | 108.2 | 129.3 | 110.5 | 82.1 | 72.7 | 97.1  | 116       | 83.966667 | 1.3815006 | 0.0303863 |
| Q9H425 | C1orf198 | Uncharacterized protein C1orf198 OS=Homo sapiens<br>OX=9606 GN=C1orf198 PE=1 SV=1                           | 41.284404 | 13 | 17  | 13 | 327  | 36.324  | 5.72 | 112.2 | 122.9 | 113   | 74.7 | 89.9 | 87.4  | 116.03333 | 84        | 1.3813492 | 0.0053459 |
| Q08174 | PCDH1    | Protocadherin-1 OS=Homo sapiens OX=9606 GN=PCDH1<br>PE=1 SV=2                                               | 5.754717  | 5  | 6   | 5  | 1060 | 114.673 | 5.03 | 124.2 | 96.2  | 127.6 | 75.6 | 83.3 | 93.1  | 116       | 84        | 1.3809524 | 0.0456263 |
| P55854 | SUMO3    | Small ubiquitin-related modifier 3 OS=Homo sapiens OX=9606<br>GN=SUMO3 PE=1 SV=2                            | 20.38835  | 2  | 6   | 1  | 103  | 11.63   | 5.49 | 106.1 | 130.1 | 111.7 | 81.5 | 72.1 | 98.5  | 115.96667 | 84.033333 | 1.3800079 | 0.0393854 |
| P30086 | PEBP1    | Phosphatidylethanolamine-binding protein 1 OS=Homo<br>sapiens OX=9606 GN=PEBP1 PE=1 SV=3                    | 73.796791 | 10 | 34  | 10 | 187  | 21.044  | 7.53 | 115.8 | 112.1 | 119.8 | 86   | 75.5 | 90.8  | 115.9     | 84.1      | 1.3781213 | 0.0032151 |
| Q5T6J7 | IDNK     | Probable gluconokinase OS=Homo sapiens OX=9606<br>GN=IDNK PE=1 SV=1                                         | 8.5561497 | 1  | 1   | 1  | 187  | 20.565  | 6.21 | 110.6 | 118.3 | 118.6 | 75.9 | 77.3 | 99.4  | 115.83333 | 84.2      | 1.3756928 | 0.0170979 |
| P32456 | GBP2     | Guanylate-binding protein 2 OS=Homo sapiens OX=9606<br>GN=GBP2 PE=1 SV=3                                    | 23.519459 | 14 | 19  | 14 | 591  | 67.166  | 5.71 | 110.8 | 101.9 | 134.4 | 85.3 | 74   | 93.6  | 115.7     | 84.3      | 1.3724792 | 0.0491032 |
| Q8NAB2 | KBTBD3   | Kelch repeat and BTB domain-containing protein 3 OS=Homo<br>sapiens OX=9606 GN=KBTBD3 PE=2 SV=2             | 1.1513158 | 1  | 1   | 1  | 608  | 69.35   | 5.39 | 120.9 | 111.7 | 114.4 | 77   | 89.5 | 86.4  | 115.66667 | 84.3      | 1.3720838 | 0.0025079 |
| Q5T6V5 | C9orf64  | Queuosine salvage protein OS=Homo sapiens OX=9606<br>GN=C9orf64 PE=1 SV=1                                   | 23.753666 | 8  | 9   | 8  | 341  | 39.004  | 5.88 | 125.1 | 107.2 | 114.5 | 84   | 72.8 | 96.4  | 115.6     | 84.4      | 1.3696682 | 0.0219585 |
| P0DMN0 | SULT1A4  | Sulfotransferase 1A4 OS=Homo sapiens OX=9606<br>GN=SULT1A4 PE=1 SV=1                                        | 23.389831 | 6  | 7   | 1  | 295  | 34.174  | 6.01 | 109.4 | 116.5 | 120.9 | 83.2 | 89.4 | 80.6  | 115.6     | 84.4      | 1.3696682 | 0.0018282 |
| P55285 | CDH6     | Cadherin-6 OS=Homo sapiens OX=9606 GN=CDH6 PE=1<br>SV=1                                                     | 15.189873 | 9  | 10  | 9  | 790  | 88.254  | 4.93 | 114.1 | 118.8 | 113.9 | 85.8 | 89.6 | 77.8  | 115.6     | 84.4      | 1.3696682 | 0.0012337 |
| P35052 | GPC1     | Glypican-1 OS=Homo sapiens OX=9606 GN=GPC1 PE=1<br>SV=1                                                     | 34.946237 | 14 | 20  | 14 | 558  | 61.641  | 7.3  | 120.3 | 105.5 | 121   | 75.8 | 82.7 | 94.8  | 115.6     | 84.433333 | 1.3691275 | 0.0142505 |
| P36269 | GGT5     | Glutathione hydrolase 5 proenzyme OS=Homo sapiens<br>OX=9606 GN=GGT5 PE=1 SV=2                              | 19.624573 | 10 | 17  | 10 | 586  | 62.222  | 7.55 | 129.8 | 113.2 | 103.6 | 93.7 | 87.9 | 71.8  | 115.53333 | 84.466667 | 1.3677979 | 0.0367901 |
| O95081 | AGFG2    | Arf-GAP domain and FG repeat-containing protein 2<br>OS=Homo sapiens OX=9606 GN=AGFG2 PE=1 SV=2             | 4.7817048 | 2  | 2   | 2  | 481  | 48.932  | 9.11 | 127.8 | 121.3 | 97.3  | 78.4 | 80.2 | 95    | 115.46667 | 84.533333 | 1.3659306 | 0.0440666 |
| P61077 | UBE2D3   | Ubiquitin-conjugating enzyme E2 D3 OS=Homo sapiens<br>OX=9606 GN=UBE2D3 PE=1 SV=1                           | 28.571429 | 3  | 4   | 3  | 147  | 16.676  | 7.8  | 104.7 | 110.7 | 130.9 | 77.6 | 77.1 | 99    | 115.43333 | 84.566667 | 1.364998  | 0.0450351 |
| P05455 | SSB      | Lupus La protein OS=Homo sapiens OX=9606 GN=SSB PE=1<br>SV=2                                                | 39.460784 | 18 | 24  | 18 | 408  | 46.808  | 7.12 | 123.1 | 110   | 112.8 | 88.6 | 71.9 | 93.6  | 115.3     | 84.7      | 1.3612751 | 0.0163065 |
| P06396 | GSN      | Gelsolin OS=Homo sapiens OX=9606 GN=GSN PE=1 SV=1<br>Macrophage migration inhibitory factor OS=Homo sapiens | 45.140665 | 32 | 106 | 32 | 782  | 85.644  | 6.28 | 122.5 | 108.1 | 114.4 | 98.7 | 80.6 | 75.7  | 115       | 85        | 1.3529412 | 0.0211191 |
| P14174 | MIF      | Ox=9606 GN=MIF PE=1 SV=4<br>Carbonyl reductase [NADPH] 3 OS=Homo sapiens OX=9606                            | 42.608696 | 5  | 20  | 5  | 115  | 12.468  | 7.88 | 123.3 | 106.5 | 115.1 | 87.1 | 71.3 | 96.7  | 114.96667 | 85.033333 | 1.3520188 | 0.0277448 |
| O75828 | CBR3     | GN=CBR3 PE=1 SV=3<br>Molybdopterin synthase sulfur carrier subunit OS=Homo                                  | 56.31769  | 12 | 22  | 9  | 277  | 30.831  | 6.18 | 109.9 | 111.7 | 123.2 | 86.3 | 77.2 | 91.7  | 114.93333 | 85.066667 | 1.3510972 | 0.0073332 |
| O96033 | MOCS2    | sapiens OX=9606 GN=MOCS2 PE=1 SV=1<br>Copper transport protein ATOX1 OS=Homo sapiens OX=9606                | 47.727273 | 2  | 2   | 2  | 88   | 9.749   | 4.72 | 101   | 134.2 | 109.2 | 88   | 80.1 | 87.5  | 114.8     | 85.2      | 1.3474178 | 0.0453738 |
| O00244 | ATOX1    | GN=ATOX1 PE=1 SV=1<br>U6 snRNA-associated Sm-like protein LSM5 OS=Homo                                      | 51.470588 | 4  | 6   | 4  | 68   | 7.397   | 7.24 | 107.1 | 126.4 | 110.8 | 86   | 73.6 | 96.2  | 114.76667 | 85.266667 | 1.3459734 | 0.0286418 |
| Q9Y4Y9 | LSM5     | sapiens OX=9606 GN=LSM5 PE=1 SV=3<br>Cytosolic 5'-nucleotidase 3A OS=Homo sapiens OX=9606                   | 46.153846 | 2  | 3   | 2  | 91   | 9.931   | 4.54 | 112   | 119   | 112.8 | 77.3 | 74.4 | 104.5 | 114.6     | 85.4      | 1.3419204 | 0.0412291 |
| Q9H0P0 | NT5C3A   | GN=NT5C3A PE=1 SV=3<br>Protein phosphatase 1 regulatory subunit 7 OS=Homo sapiens                           | 12.5      | 4  | 4   | 4  | 336  | 37.924  | 7.12 | 110.4 | 101.5 | 131.9 | 87.1 | 84.1 | 85.1  | 114.6     | 85.433333 | 1.3413968 | 0.0323734 |
| Q15435 | PPP1R7   | OX=9606 GN=PPP1R7 PE=1 SV=1<br>Galectin-related protein OS=Homo sapiens OX=9606                             | 25        | 9  | 13  | 9  | 360  | 41.539  | 4.91 | 116.6 | 113.9 | 112.2 | 86   | 75.3 | 96    | 114.23333 | 85.766667 | 1.3319083 | 0.00961   |
| Q3ZCW2 | LGALS1   | GN=LGALS1 PE=1 SV=2<br>SET and MYND domain-containing protein 5 OS=Homo                                     | 21.511628 | 3  | 4   | 3  | 172  | 18.974  | 5.35 | 106.2 | 110.9 | 125.1 | 87   | 73.3 | 97.4  | 114.06667 | 85.9      | 1.3279007 | 0.0351833 |
| Q6GMV2 | SMYD5    | sapiens OX=9606 GN=SMYD5 PE=1 SV=2<br>Pleiotrophin OS=Homo sapiens OX=9606 GN=PTN PE=1                      | 5.5023923 | 2  | 2   | 2  | 418  | 47.31   | 5.05 | 115.5 | 104.6 | 121.8 | 78.2 | 81.4 | 98.5  | 113.96667 | 86.033333 | 1.3246804 | 0.0256754 |
| P21246 | PTN      | Lactoylglutathione lyase OS=Homo sapiens OX=9606<br>GN=PTN PE=1 SV=1                                        | 14.880952 | 2  | 2   | 2  | 168  | 18.93   | 9.6  | 115.6 | 122.4 | 103.8 | 80.8 | 85.2 | 92.1  | 113.93333 | 86.033333 | 1.3242929 | 0.0117569 |
| Q04760 | GLO1     | GN=GLO1 PE=1 SV=4<br>Inositol-tetrakisphosphate 1-kinase OS=Homo sapiens                                    | 67.391304 | 12 | 21  | 12 | 184  | 20.764  | 5.31 | 122.8 | 107.2 | 111.6 | 92.2 | 77.3 | 88.8  | 113.86667 | 86.1      | 1.3224932 | 0.0127439 |
| Q13572 | ITPK1    | OX=9606 GN=ITPK1 PE=1 SV=2<br>Serpin B6 OS=Homo sapiens OX=9606 GN=SERPINB6 PE=1                            | 15.217391 | 4  | 5   | 4  | 414  | 45.592  | 6.16 | 120   | 113.3 | 108.2 | 79.9 | 83.8 | 94.8  | 113.83333 | 86.166667 | 1.3210832 | 0.0079091 |
| P35237 | SERPINB6 | SV=3<br>Cytoplasmic aconitate hydratase OS=Homo sapiens OX=9606                                             | 50        | 14 | 41  | 14 | 376  | 42.594  | 5.27 | 117.3 | 111.5 | 112.5 | 89.2 | 75.2 | 94.4  | 113.76667 | 86.266667 | 1.318779  | 0.0101948 |
| P21399 | ACO1     | GN=ACO1 PE=1 SV=3<br>Prothymosin alpha OS=Homo sapiens OX=9606 GN=PTMA                                      | 34.533183 | 24 | 33  | 24 | 889  | 98.337  | 6.68 | 114.1 | 110   | 116.7 | 89.6 | 80.2 | 89.4  | 113.6     | 86.4      | 1.3148148 | 0.0017555 |
| P06454 | PTMA     | PE=1 SV=2<br>Chloride intracellular channel protein 4 OS=Homo sapiens                                       | 26.126126 | 3  | 10  | 3  | 111  | 12.196  | 3.78 | 115.5 | 103   | 122.1 | 86.8 | 80.5 | 92.2  | 113.53333 | 86.5      | 1.3125241 | 0.0144671 |
| Q9Y696 | CLIC4    | OX=9606 GN=CLIC4 PE=1 SV=4<br>Prolyl endopeptidase OS=Homo sapiens OX=9606 GN=PREP                          | 66.007905 | 15 | 32  | 15 | 253  | 28.754  | 5.59 | 123   | 100.1 | 117.2 | 85.5 | 79.9 | 94.3  | 113.43333 | 86.566667 | 1.3103581 | 0.0289104 |
| P48147 | PREP     | PE=1 SV=2<br>Peptidyl-prolyl cis-trans isomerase-like 3 OS=Homo sapiens                                     | 44.225352 | 26 | 33  | 26 | 710  | 80.648  | 5.86 | 112.2 | 108.7 | 119.3 | 84.5 | 79.2 | 96.1  | 113.4     | 86.6      | 1.3094688 | 0.010383  |
| Q9H2H8 | PPIL3    | OX=9606 GN=PPIL3 PE=1 SV=1<br>Mini-chromosome maintenance complex-binding protein                           | 31.677019 | 4  | 6   | 4  | 161  | 18.143  | 6.79 | 104.6 | 115   | 120.6 | 83.5 | 74.9 | 101.4 | 113.4     | 86.6      | 1.3094688 | 0.042241  |
| Q9BTE3 | MCMBP    | OS=Homo sapiens OX=9606 GN=MCMBP PE=1 SV=2<br>Heat shock protein beta-1 OS=Homo sapiens OX=9606             | 3.1152648 | 1  | 1   | 1  | 642  | 72.934  | 5.87 | 107   | 116.8 | 116.4 | 85.7 | 79.1 | 95.1  | 113.4     | 86.633333 | 1.308965  | 0.0089957 |
| P04792 | HSPB1    | GN=HSPB1 PE=1 SV=2                                                                                          | 70.243902 | 15 | 46  | 15 | 205  | 22.768  | 6.4  | 119.2 | 110.1 | 110.6 | 95.3 | 80.3 | 84.5  | 113.3     | 86.7      | 1.3068051 | 0.0076695 |

|        |          |                                                                                                                                                                                                                        |           |    |     |    |      |         |      |       |       |       |       |       |       |           |           |           |           |
|--------|----------|------------------------------------------------------------------------------------------------------------------------------------------------------------------------------------------------------------------------|-----------|----|-----|----|------|---------|------|-------|-------|-------|-------|-------|-------|-----------|-----------|-----------|-----------|
| P06737 | PYGL     | Glycogen phosphorylase, liver form OS=Homo sapiens<br>OX=9606 GN=PYGL PE=1 SV=4                                                                                                                                        | 48.760331 | 38 | 59  | 31 | 847  | 97.087  | 7.17 | 106.5 | 104.5 | 128.8 | 89.8  | 84    | 86.5  | 113.26667 | 86.766667 | 1.3054168 | 0.0292102 |
| Q9BZ23 | PANK2    | Pantothenate kinase 2, mitochondrial OS=Homo sapiens<br>OX=9606 GN=PANK2 PE=1 SV=3                                                                                                                                     | 2.6315789 | 1  | 1   | 1  | 570  | 62.641  | 9.28 | 112.5 | 125.5 | 101.5 | 87.1  | 78.2  | 95.2  | 113.16667 | 86.833333 | 1.303263  | 0.0362615 |
| Q15056 | EIF4H    | Eukaryotic translation initiation factor 4H OS=Homo sapiens<br>OX=9606 GN=EIF4H PE=1 SV=5                                                                                                                              | 27.016129 | 5  | 7   | 5  | 248  | 27.368  | 7.23 | 118.8 | 101.1 | 119.6 | 80.4  | 79    | 101.2 | 113.16667 | 86.866667 | 1.3027629 | 0.0486167 |
| P05023 | ATP1A1   | Sodium/potassium-transporting ATPase subunit alpha-1<br>OS=Homo sapiens OX=9606 GN=ATP1A1 PE=1 SV=1<br>Pyruvate dehydrogenase E1 component subunit beta,<br>mitochondrial OS=Homo sapiens OX=9606 GN=PDHB PE=1<br>SV=3 | 49.266862 | 50 | 112 | 32 | 1023 | 112.824 | 5.49 | 84.2  | 91.2  | 83.6  | 108.8 | 128.3 | 103.8 | 86.333333 | 113.63333 | 0.7597536 | 0.0255286 |
| P11177 | PDHB     | Voltage-dependent anion-selective channel protein 1<br>OS=Homo sapiens OX=9606 GN=VDAC1 PE=1 SV=2                                                                                                                      | 42.061281 | 11 | 18  | 11 | 359  | 39.208  | 6.65 | 91.6  | 84.3  | 82.9  | 117.3 | 122.5 | 101.4 | 86.266667 | 113.73333 | 0.7584994 | 0.0163607 |
| P21796 | VDAC1    | Protein S100-A16 OS=Homo sapiens OX=9606 GN=S100A16<br>PE=1 SV=1                                                                                                                                                       | 77.385159 | 16 | 60  | 15 | 283  | 30.754  | 8.54 | 85.7  | 87.9  | 85    | 101.1 | 112.8 | 127.6 | 86.2      | 113.83333 | 0.7572474 | 0.0231497 |
| Q96FQ6 | S100A16  | NADH dehydrogenase [ubiquinone] 1 beta subcomplex subunit<br>3 OS=Homo sapiens OX=9606 GN=NDUFB3 PE=1 SV=3                                                                                                             | 22.330097 | 2  | 3   | 2  | 103  | 11.794  | 6.79 | 83.7  | 87.8  | 86.7  | 106.7 | 113.2 | 121.9 | 86.066667 | 113.93333 | 0.7554125 | 0.0036603 |
| O43676 | NDUFB3   | Carnitine O-palmitoyltransferase 1, liver isoform OS=Homo<br>sapiens OX=9606 GN=CPT1A PE=1 SV=2                                                                                                                        | 28.571429 | 3  | 3   | 3  | 98   | 11.395  | 9.2  | 87.1  | 86    | 85    | 102.3 | 112.2 | 127.3 | 86.033333 | 113.93333 | 0.75512   | 0.0186969 |
| P50416 | CPT1A    | Tetratricopeptide repeat protein 5 OS=Homo sapiens<br>OX=9606 GN=TTC5 PE=1 SV=2                                                                                                                                        | 27.166882 | 19 | 27  | 19 | 773  | 88.311  | 8.65 | 83.8  | 90.6  | 83.7  | 101.2 | 121.6 | 119.1 | 86.033333 | 113.96667 | 0.7548991 | 0.014888  |
| Q8N0Z6 | TTC5     | EH domain-containing protein 3 OS=Homo sapiens OX=9606<br>GN=EHD3 PE=1 SV=2                                                                                                                                            | 3.4090909 | 1  | 1   | 1  | 440  | 48.897  | 6.48 | 75.2  | 97.1  | 85.7  | 108.3 | 128.8 | 105   | 86        | 114.03333 | 0.7541654 | 0.0454706 |
| Q9NZN3 | EHD3     | Redox-regulatory protein FAM213A OS=Homo sapiens<br>OX=9606 GN=FAM213A PE=1 SV=3                                                                                                                                       | 34.018692 | 17 | 25  | 8  | 535  | 60.849  | 6.57 | 84.5  | 84.5  | 88.9  | 108.5 | 120.8 | 112.8 | 85.966667 | 114.03333 | 0.7538731 | 0.0019583 |
| Q9BRX8 | FAM213A  | 3-ketoacyl-CoA thiolase, mitochondrial OS=Homo sapiens<br>OX=9606 GN=ACAA2 PE=1 SV=2                                                                                                                                   | 35.80786  | 8  | 17  | 8  | 229  | 25.747  | 8.84 | 82.8  | 91.8  | 83.3  | 113   | 121.5 | 107.6 | 85.966667 | 114.03333 | 0.7538731 | 0.0049119 |
| P42765 | ACAA2    | Aspartate aminotransferase, mitochondrial OS=Homo sapiens<br>OX=9606 GN=GOT2 PE=1 SV=3                                                                                                                                 | 44.332494 | 14 | 23  | 14 | 397  | 41.898  | 8.09 | 91.9  | 83.1  | 82.8  | 109.9 | 115.5 | 116.8 | 85.933333 | 114.06667 | 0.7533606 | 0.0015392 |
| P00505 | GOT2     | Single-stranded DNA-binding protein, mitochondrial OS=Homo<br>sapiens OX=9606 GN=SSBP1 PE=1 SV=1                                                                                                                       | 38.139535 | 16 | 32  | 16 | 430  | 47.487  | 9.01 | 84.5  | 89.9  | 83.3  | 109.3 | 107.9 | 125.2 | 85.9      | 114.13333 | 0.7526285 | 0.0087816 |
| Q04837 | SSBP1    | Fumarylacetoacetate hydrolase domain-containing protein 2A<br>OS=Homo sapiens OX=9606 GN=FAHD2A PE=1 SV=1                                                                                                              | 37.837838 | 4  | 8   | 4  | 148  | 17.249  | 9.6  | 93.2  | 76.3  | 87.9  | 102.8 | 115   | 124.8 | 85.8      | 114.2     | 0.7513135 | 0.0246299 |
| Q96GK7 | FAHD2A   | Mitochondrial import receptor subunit TOM5 homolog<br>OS=Homo sapiens OX=9606 GN=TOMM5 PE=1 SV=1                                                                                                                       | 30.573248 | 8  | 12  | 8  | 314  | 34.574  | 8.24 | 82.8  | 92.2  | 82.3  | 118.5 | 114   | 110.3 | 85.766667 | 114.26667 | 0.7505834 | 0.0020486 |
| Q8N4H5 | TOMM5    | 4F2 cell-surface antigen heavy chain OS=Homo sapiens<br>OX=9606 GN=SLC3A2 PE=1 SV=3                                                                                                                                    | 27.45098  | 2  | 3   | 2  | 51   | 6.031   | 9.7  | 96.3  | 80.3  | 80.6  | 114.8 | 124.5 | 103.4 | 85.733333 | 114.23333 | 0.7505107 | 0.0241823 |
| P08195 | SLC3A2   | COMM domain-containing protein 2 OS=Homo sapiens<br>OX=9606 GN=COMMD2 PE=1 SV=2                                                                                                                                        | 22.222222 | 11 | 17  | 11 | 630  | 67.952  | 5.01 | 78.4  | 96    | 82.8  | 104   | 114.7 | 124.1 | 85.733333 | 114.26667 | 0.7502917 | 0.022098  |
| Q86X83 | COMMD2   | Calcium-binding mitochondrial carrier protein Aralar1<br>OS=Homo sapiens OX=9606 GN=SLC25A12 PE=1 SV=2                                                                                                                 | 4.0201005 | 1  | 1   | 1  | 199  | 22.731  | 6.73 | 80.5  | 91.3  | 85.4  | 109.2 | 129.9 | 103.7 | 85.733333 | 114.26667 | 0.7502917 | 0.029074  |
| O75746 | SLC25A12 | Serine incorporator 5 OS=Homo sapiens OX=9606<br>GN=SERINC5 PE=2 SV=1                                                                                                                                                  | 38.938053 | 23 | 34  | 18 | 678  | 74.715  | 8.38 | 88.2  | 82.7  | 86.1  | 119.1 | 112.6 | 111.2 | 85.666667 | 114.3     | 0.7494896 | 0.0006014 |
| Q86VE9 | SERINC5  | Cell adhesion molecule 4 OS=Homo sapiens OX=9606<br>GN=CADM4 PE=1 SV=1                                                                                                                                                 | 9.2198582 | 5  | 5   | 5  | 423  | 46.977  | 7.62 | 78    | 88.4  | 90.6  | 113.8 | 128.3 | 101   | 85.666667 | 114.36667 | 0.7490528 | 0.0309456 |
| Q8NFZ8 | CADM4    | Cohesin subunit SA-1 OS=Homo sapiens OX=9606<br>GN=STAG1 PE=1 SV=3                                                                                                                                                     | 46.391753 | 11 | 25  | 11 | 388  | 42.759  | 6.3  | 83.7  | 85.6  | 87.5  | 115.6 | 128   | 99.5  | 85.6      | 114.36667 | 0.7484698 | 0.0259047 |
| Q8WVM7 | STAG1    | Nectin-2 OS=Homo sapiens OX=9606 GN=NECTIN2 PE=1<br>ATP synthase subunit epsilon, mitochondrial OS=Homo                                                                                                                | 6.518283  | 8  | 8   | 5  | 1258 | 144.336 | 5.59 | 81.9  | 84.6  | 90.3  | 104.5 | 105   | 133.6 | 85.6      | 114.36667 | 0.7484698 | 0.0442704 |
| Q92692 | NECTIN2  | sapiens OX=9606 GN=ATP5F1E PE=1 SV=2                                                                                                                                                                                   | 6.8773234 | 4  | 5   | 4  | 538  | 57.706  | 4.82 | 95.1  | 81.2  | 80.5  | 121.3 | 125   | 96.9  | 85.6      | 114.4     | 0.7482517 | 0.0452131 |
| P56381 | ATP5F1E  | Kinesin-like protein KIF21A OS=Homo sapiens OX=9606<br>GN=KIF21A PE=1 SV=2                                                                                                                                             | 43.137255 | 3  | 4   | 3  | 51   | 5.776   | 9.92 | 92.8  | 78.9  | 85.1  | 116.7 | 111.1 | 115.4 | 85.6      | 114.4     | 0.7482517 | 0.0027268 |
| Q7Z4S6 | KIF21A   | Phospholipid-transporting ATPase IB OS=Homo sapiens<br>OX=9606 GN=ATP8A2 PE=1 SV=2                                                                                                                                     | 27.299881 | 34 | 45  | 34 | 1674 | 187.063 | 6.42 | 80.8  | 90.5  | 85.5  | 101.3 | 132.5 | 109.5 | 85.6      | 114.43333 | 0.7480338 | 0.041658  |
| Q9NTI2 | ATP8A2   | 28S ribosomal protein S36, mitochondrial OS=Homo sapiens<br>OX=9606 GN=MRPS36 PE=1 SV=2                                                                                                                                | 1.9163763 | 2  | 2   | 2  | 1148 | 129.159 | 7.78 | 85.8  | 82.8  | 88.1  | 108.2 | 127.3 | 107.7 | 85.566667 | 114.4     | 0.7479604 | 0.0121773 |
| P82909 | MRPS36   | UDP-glucose 4-epimerase OS=Homo sapiens OX=9606<br>GN=GALE PE=1 SV=2                                                                                                                                                   | 29.126214 | 2  | 2   | 2  | 103  | 11.459  | 9.99 | 87.3  | 79.4  | 90    | 109.5 | 118.3 | 115.4 | 85.566667 | 114.4     | 0.7479604 | 0.0021562 |
| Q14376 | GALE     | Serine protease HTRA1 OS=Homo sapiens OX=9606<br>GN=HTRA1 PE=1 SV=1                                                                                                                                                    | 2.8735632 | 1  | 1   | 1  | 348  | 38.257  | 6.73 | 92.7  | 88.2  | 75.8  | 109.5 | 120.9 | 112.9 | 85.566667 | 114.43333 | 0.7477425 | 0.0089794 |
| Q92743 | HTRA1    | NADH dehydrogenase [ubiquinone] 1 beta subcomplex subunit<br>10 OS=Homo sapiens OX=9606 GN=NDUFB10 PE=1 SV=3                                                                                                           | 9.375     | 4  | 4   | 4  | 480  | 51.255  | 7.83 | 93.4  | 83.8  | 79.4  | 101.3 | 116.4 | 125.7 | 85.533333 | 114.46667 | 0.7472335 | 0.0244896 |
| O96000 | NDUFB10  | DnaJ homolog subfamily C member 10 OS=Homo sapiens<br>OX=9606 GN=DNAJC10 PE=1 SV=2                                                                                                                                     | 34.883721 | 6  | 10  | 6  | 172  | 20.763  | 8.48 | 88.2  | 84.1  | 84.1  | 104.5 | 117.8 | 121.2 | 85.466667 | 114.5     | 0.7464338 | 0.0053162 |
| Q8IXB1 | DNAJC10  | Unconventional myosin-IXa OS=Homo sapiens OX=9606<br>GN=MYO9A PE=1 SV=2                                                                                                                                                | 8.0706179 | 6  | 6   | 6  | 793  | 91.021  | 7.18 | 84.2  | 91.7  | 80.3  | 104.6 | 117.8 | 121.3 | 85.4      | 114.56667 | 0.7454175 | 0.0086982 |
| B2RTY4 | MYO9A    | Dipeptidyl aminopeptidase-like protein 6 OS=Homo sapiens<br>OX=9606 GN=DPP6 PE=1 SV=2                                                                                                                                  | 1.3736264 | 3  | 3   | 2  | 2548 | 292.522 | 8.88 | 85.2  | 86.5  | 84.4  | 115.6 | 130.6 | 97.7  | 85.366667 | 114.63333 | 0.7446932 | 0.0372491 |
| P42658 | DPP6     | Creatine kinase U-type, mitochondrial OS=Homo sapiens<br>OX=9606 GN=CKMT1A PE=1 SV=1                                                                                                                                   | 1.3872832 | 1  | 2   | 1  | 865  | 97.527  | 6.37 | 76    | 100   | 80    | 112.1 | 119.1 | 112.7 | 85.333333 | 114.63333 | 0.7444024 | 0.01946   |
| P12532 | CKMT1A   | ATP synthase subunit g, mitochondrial OS=Homo sapiens<br>OX=9606 GN=ATP5L PE=1 SV=3                                                                                                                                    | 42.685851 | 12 | 17  | 10 | 417  | 47.007  | 8.34 | 82.1  | 90.1  | 83.7  | 114.2 | 111.5 | 118.5 | 85.3      | 114.73333 | 0.7434631 | 0.0007598 |
| O75964 | ATP5L    | Metaxin-2 OS=Homo sapiens OX=9606 GN=MTX2 PE=1<br>Contactin-associated protein 1 OS=Homo sapiens OX=9606                                                                                                               | 31.067961 | 4  | 8   | 4  | 103  | 11.421  | 9.64 | 84.5  | 92.7  | 78.6  | 118   | 119.7 | 106.4 | 85.266667 | 114.7     | 0.7433885 | 0.0073096 |
| O75431 | MTX2     | MICOS complex subunit MIC19 OS=Homo sapiens OX=9606<br>GN=CNTNAP1 PE=1 SV=1                                                                                                                                            | 25.855513 | 4  | 6   | 4  | 263  | 29.744  | 6.29 | 80.7  | 81.7  | 93.1  | 106.8 | 122.3 | 115.3 | 85.166667 | 114.8     | 0.7418699 | 0.0077851 |
| P78357 | CNTNAP1  | MICOS complex subunit MIC19 OS=Homo sapiens OX=9606<br>GN=CHCHD3 PE=1 SV=1                                                                                                                                             | 12.427746 | 15 | 20  | 15 | 1384 | 156.167 | 7.05 | 85.4  | 81.2  | 88.9  | 116.8 | 130.1 | 97.6  | 85.166667 | 114.83333 | 0.7416546 | 0.0376282 |
| Q9NX63 | CHCHD3   | Cytochrome c oxidase subunit 5B, mitochondrial OS=Homo<br>sapiens OX=9606 GN=COX5B PE=1 SV=2                                                                                                                           | 52.422907 | 15 | 23  | 15 | 227  | 26.136  | 8.28 | 92.2  | 80    | 82.7  | 108.5 | 131.8 | 104.8 | 84.966667 | 115.03333 | 0.7386265 | 0.0311072 |
| P10606 | COX5B    | ATPase family AAA domain-containing protein 3B OS=Homo<br>sapiens OX=9606 GN=ATAD3B PE=1 SV=1                                                                                                                          | 30.232558 | 5  | 10  | 5  | 129  | 13.687  | 8.81 | 83.2  | 89.7  | 81.7  | 101.8 | 109.1 | 134.5 | 84.866667 | 115.13333 | 0.7371164 | 0.0413678 |
| Q5T9A4 | ATAD3B   | MICOS complex subunit MIC10 OS=Homo sapiens OX=9606<br>GN=MINOS1 PE=1 SV=1                                                                                                                                             | 11.419753 | 8  | 10  | 1  | 648  | 72.527  | 9.2  | 86.6  | 86    | 81.9  | 104.5 | 127.1 | 113.8 | 84.833333 | 115.13333 | 0.7368269 | 0.0107614 |
| Q5TGZ0 | MINOS1   | Guanine nucleotide-binding protein G(z) subunit alpha<br>OS=Homo sapiens OX=9606 GN=GNAZ PE=1 SV=3                                                                                                                     | 10.25641  | 1  | 2   | 1  | 78   | 8.802   | 8.5  | 93.9  | 78.4  | 82    | 108.4 | 127.1 | 110.2 | 84.766667 | 115.23333 | 0.7356089 | 0.0158511 |
| P19086 | GNAZ     | Voltage-gated potassium channel subunit beta-2 OS=Homo<br>sapiens OX=9606 GN=KCNAB2 PE=1 SV=2                                                                                                                          | 27.887324 | 9  | 16  | 8  | 355  | 40.898  | 7.61 | 82.7  | 87.2  | 83.9  | 119.3 | 131.8 | 95.2  | 84.6      | 115.43333 | 0.7328906 | 0.0464719 |
| Q13303 | KCNAB2   |                                                                                                                                                                                                                        | 11.716621 | 3  | 4   | 3  | 367  | 40.974  | 9    | 78.2  | 89.8  | 85.7  | 106.4 | 132   | 107.9 | 84.566667 | 115.43333 | 0.7326018 | 0.0262029 |

|        |          |                                                                                                                                                     |           |    |    |    |      |         |       |      |       |      |       |       |       |           |           |           |           |
|--------|----------|-----------------------------------------------------------------------------------------------------------------------------------------------------|-----------|----|----|----|------|---------|-------|------|-------|------|-------|-------|-------|-----------|-----------|-----------|-----------|
| P11182 | DBT      | Lipoamide acyltransferase component of branched-chain alpha-keto acid dehydrogenase complex, mitochondrial OS=Homo sapiens OX=9606 GN=DBT PE=1 SV=3 | 26.141079 | 11 | 13 | 11 | 482  | 53.453  | 8.51  | 89   | 83.1  | 81.3 | 118.5 | 126.8 | 101.2 | 84.466667 | 115.5     | 0.7313131 | 0.0170649 |
| O95182 | NDUFA7   | NADH dehydrogenase [ubiquinone] 1 alpha subcomplex subunit 7 OS=Homo sapiens OX=9606 GN=NDUFA7 PE=1                                                 | 47.787611 | 5  | 5  | 5  | 113  | 12.544  | 10.18 | 81.8 | 82.5  | 89   | 97.4  | 126   | 123.4 | 84.433333 | 115.6     | 0.7303922 | 0.0296381 |
| P48047 | ATP5O    | ATP synthase subunit O, mitochondrial OS=Homo sapiens OX=9606 GN=ATP5O PE=1 SV=1                                                                    | 42.253521 | 8  | 23 | 8  | 213  | 23.263  | 9.96  | 87.4 | 82.7  | 83.1 | 114.4 | 124   | 108.4 | 84.4      | 115.6     | 0.7301038 | 0.0028583 |
| P23469 | PTPRE    | Receptor-type tyrosine-protein phosphatase epsilon OS=Homo sapiens OX=9606 GN=PTPRE PE=1 SV=1                                                       | 11.571429 | 9  | 10 | 7  | 700  | 80.59   | 7.02  | 86.4 | 83.3  | 83.4 | 110.3 | 126.4 | 110.2 | 84.366667 | 115.63333 | 0.7296051 | 0.0046609 |
| Q9Y277 | VDAC3    | Voltage-dependent anion-selective channel protein 3 OS=Homo sapiens OX=9606 GN=VDAC3 PE=1 SV=1                                                      | 49.469965 | 11 | 29 | 10 | 283  | 30.639  | 8.66  | 79.3 | 90.3  | 83.4 | 111.4 | 119   | 116.6 | 84.333333 | 115.66667 | 0.7291066 | 0.0013226 |
| Q9H0R8 | GABARAPL | Gamma-aminobutyric acid receptor-associated protein-like 1 OS=Homo sapiens OX=9606 GN=GABARAPL1 PE=1 SV=1                                           | 15.384615 | 3  | 4  | 1  | 117  | 14.035  | 8.73  | 78.4 | 72.6  | 102  | 107.2 | 123.6 | 116.2 | 84.333333 | 115.66667 | 0.7291066 | 0.0368366 |
| Q9UHN6 | TMEM2    | Cell surface hyaluronidase OS=Homo sapiens OX=9606 GN=TMEM2 PE=1 SV=1                                                                               | 3.2537961 | 4  | 4  | 4  | 1383 | 154.276 | 8.15  | 86.5 | 97.1  | 69.3 | 117.9 | 122.1 | 107   | 84.3      | 115.66667 | 0.7288184 | 0.0276551 |
| O95716 | RAB3D    | Ras-related protein Rab-3D OS=Homo sapiens OX=9606 GN=RAB3D PE=1 SV=1                                                                               | 38.356164 | 7  | 16 | 2  | 219  | 24.252  | 4.93  | 84.5 | 78.8  | 89.6 | 98    | 117.3 | 131.8 | 84.3      | 115.7     | 0.7286085 | 0.0378061 |
| P60520 | GABARAPL | Gamma-aminobutyric acid receptor-associated protein-like 2 OS=Homo sapiens OX=9606 GN=GABARAPL2 PE=1 SV=1                                           | 45.299145 | 7  | 11 | 5  | 117  | 13.658  | 8.1   | 77   | 85.5  | 90.4 | 111   | 114.2 | 121.9 | 84.3      | 115.7     | 0.7286085 | 0.0034758 |
| Q8WUY3 | PRUNE2   | Protein prune homolog 2 OS=Homo sapiens OX=9606 GN=PRUNE2 PE=1 SV=3                                                                                 | 5.861399  | 14 | 16 | 14 | 3088 | 340.425 | 4.45  | 75.2 | 90.9  | 86.7 | 96    | 126.2 | 125   | 84.266667 | 115.73333 | 0.7281106 | 0.0450767 |
| Q5T0D9 | TPRG1L   | Tumor protein p63-regulated gene 1-like protein OS=Homo sapiens OX=9606 GN=TPRG1L PE=1 SV=1                                                         | 8.8235294 | 2  | 2  | 2  | 272  | 30.193  | 7.34  | 82.1 | 86.6  | 84.1 | 109.1 | 108.6 | 129.5 | 84.266667 | 115.73333 | 0.7281106 | 0.0108986 |
| P36542 | ATP5F1C  | ATP synthase subunit gamma, mitochondrial OS=Homo sapiens OX=9606 GN=ATP5F1C PE=1 SV=1                                                              | 24.161074 | 7  | 18 | 7  | 298  | 32.975  | 9.22  | 88.4 | 80.1  | 84.2 | 115.7 | 126.5 | 105.1 | 84.233333 | 115.76667 | 0.727613  | 0.0089121 |
| P45880 | VDAC2    | Voltage-dependent anion-selective channel protein 2 OS=Homo sapiens OX=9606 GN=VDAC2 PE=1 SV=2                                                      | 65.306122 | 14 | 40 | 14 | 294  | 31.547  | 7.56  | 87.3 | 83.9  | 81.3 | 108.6 | 135.2 | 103.6 | 84.166667 | 115.8     | 0.7268279 | 0.0336572 |
| Q96DB2 | HDAC11   | Histone deacetylase 11 OS=Homo sapiens OX=9606 GN=HDAC11 PE=1 SV=1                                                                                  | 11.815562 | 4  | 5  | 4  | 347  | 39.158  | 7.65  | 85.5 | 89.2  | 77.8 | 123.6 | 127.5 | 96.4  | 84.166667 | 115.83333 | 0.7266187 | 0.0375862 |
| P08174 | CD55     | Complement decay-accelerating factor OS=Homo sapiens OX=9606 GN=CD55 PE=1 SV=4                                                                      | 15.485564 | 7  | 9  | 7  | 381  | 41.374  | 7.59  | 83.6 | 75.4  | 93.4 | 114.5 | 130.5 | 102.6 | 84.133333 | 115.86667 | 0.726122  | 0.0299009 |
| Q6PI78 | TMEM65   | Transmembrane protein 65 OS=Homo sapiens OX=9606 GN=TMEM65 PE=1 SV=2                                                                                | 22.916667 | 5  | 6  | 5  | 240  | 25.481  | 8.6   | 85.1 | 81.8  | 85.4 | 113.9 | 131.1 | 102.8 | 84.1      | 115.93333 | 0.7254169 | 0.0186279 |
| P12236 | SLC25A6  | ADP/ATP translocase 3 OS=Homo sapiens OX=9606 GN=SLC25A6 PE=1 SV=4                                                                                  | 52.348993 | 17 | 34 | 2  | 298  | 32.845  | 9.74  | 88.4 | 77.1  | 86.5 | 106.3 | 112.5 | 129.2 | 84        | 116       | 0.7241379 | 0.0140627 |
| Q9BQI0 | AIF1L    | Allograft inflammatory factor 1-like OS=Homo sapiens OX=9606 GN=AIF1L PE=1 SV=1                                                                     | 43.333333 | 6  | 10 | 6  | 150  | 17.057  | 7.2   | 84.2 | 89.9  | 77.8 | 133.3 | 100.6 | 114.2 | 83.966667 | 116.03333 | 0.7236426 | 0.0337752 |
| P32189 | GK       | Glycerol kinase OS=Homo sapiens OX=9606 GN=GK PE=1 SV=3                                                                                             | 9.8389982 | 6  | 6  | 6  | 559  | 61.205  | 6.54  | 82.8 | 84.8  | 84.3 | 115.2 | 123   | 109.9 | 83.966667 | 116.03333 | 0.7236426 | 0.0011373 |
| Q9BXM9 | FSD1L    | FSD1-like protein OS=Homo sapiens OX=9606 GN=FSD1L PE=1 SV=2                                                                                        | 21.509434 | 8  | 9  | 8  | 530  | 59.541  | 6.2   | 77   | 88.6  | 85.7 | 112.6 | 118.9 | 117.2 | 83.766667 | 116.23333 | 0.7206768 | 0.0012069 |
| Q9HB71 | CACYBP   | Calcyclin-binding protein OS=Homo sapiens OX=9606 GN=CACYBP PE=1 SV=2                                                                               | 36.403509 | 8  | 8  | 8  | 228  | 26.194  | 8.25  | 80   | 85.4  | 85.6 | 125.8 | 126.7 | 96.4  | 83.666667 | 116.3     | 0.7194038 | 0.0321483 |
| O75366 | AVIL     | Advillin OS=Homo sapiens OX=9606 GN=AVIL PE=1 SV=3                                                                                                  | 25.763126 | 17 | 25 | 17 | 819  | 91.969  | 5.71  | 83.6 | 73.7  | 92.6 | 108.2 | 117.8 | 124.1 | 83.3      | 116.7     | 0.7137961 | 0.009521  |
| Q8IWT1 | SCN4B    | Sodium channel subunit beta-4 OS=Homo sapiens OX=9606 GN=SCN4B PE=1 SV=1                                                                            | 3.9473684 | 1  | 2  | 1  | 228  | 24.953  | 7.36  | 78.2 | 90.6  | 80.7 | 110   | 132   | 108.5 | 83.166667 | 116.83333 | 0.7118402 | 0.0165822 |
| Q9NY35 | CLDND1   | Claudin domain-containing protein 1 OS=Homo sapiens OX=9606 GN=CLDND1 PE=1 SV=1                                                                     | 5.5335968 | 1  | 1  | 1  | 253  | 28.584  | 5.82  | 91.3 | 76.7  | 80.9 | 119.2 | 130.5 | 101.3 | 82.966667 | 117       | 0.7091168 | 0.0234635 |
| Q5HYI7 | MTX3     | Metaxin-3 OS=Homo sapiens OX=9606 GN=MTX3 PE=1                                                                                                      | 3.2051282 | 1  | 1  | 1  | 312  | 35.071  | 7.8   | 73.8 | 102.8 | 72.3 | 122.4 | 124.3 | 104.5 | 82.966667 | 117.06667 | 0.708713  | 0.0441382 |
| Q9NZ45 | CISD1    | CDGSH iron-sulfur domain-containing protein 1 OS=Homo sapiens OX=9606 GN=CISD1 PE=1 SV=1                                                            | 44.444444 | 4  | 8  | 4  | 108  | 12.191  | 9.09  | 84.2 | 83.3  | 81   | 107   | 124.5 | 120.1 | 82.833333 | 117.2     | 0.7067691 | 0.0030015 |
| P14927 | UQCRB    | Cytochrome b-c1 complex subunit 7 OS=Homo sapiens OX=9606 GN=UQCRB PE=1 SV=2                                                                        | 31.531532 | 4  | 7  | 4  | 111  | 13.522  | 8.78  | 84.2 | 81.1  | 82.9 | 108.1 | 128.4 | 115.4 | 82.733333 | 117.3     | 0.705314  | 0.0045153 |
| P00846 | MT-ATP6  | ATP synthase subunit a OS=Homo sapiens OX=9606 GN=MT-ATP6 PE=1 SV=1                                                                                 | 4.4247788 | 1  | 2  | 1  | 226  | 24.801  | 10.1  | 84.3 | 85.1  | 78.5 | 125.6 | 111.9 | 114.7 | 82.633333 | 117.4     | 0.7038614 | 0.0017356 |
| Q5W0Z9 | ZDHHC20  | Palmitoyltransferase ZDHHC20 OS=Homo sapiens OX=9606 GN=ZDHHC20 PE=1 SV=1                                                                           | 4.9315068 | 2  | 2  | 2  | 365  | 42.25   | 7.71  | 80.4 | 80.4  | 87   | 126.6 | 114.6 | 110.9 | 82.6      | 117.36667 | 0.7037773 | 0.0026481 |
| Q7L3T8 | PARS2    | Probable proline--tRNA ligase, mitochondrial OS=Homo sapiens OX=9606 GN=PARS2 PE=1 SV=1                                                             | 3.3684211 | 1  | 1  | 1  | 475  | 53.228  | 8.1   | 78.9 | 87.3  | 81.6 | 103.7 | 139.1 | 109.4 | 82.6      | 117.4     | 0.7035775 | 0.0364551 |
| Q9NRX3 | NDUFA4L2 | NADH dehydrogenase [ubiquinone] 1 alpha subcomplex subunit 4-like 2 OS=Homo sapiens OX=9606 GN=NDUFA4L2                                             | 9.1954023 | 1  | 2  | 1  | 87   | 9.959   | 9.92  | 80.8 | 75.2  | 91.8 | 103.2 | 135.9 | 113.2 | 82.6      | 117.43333 | 0.7033778 | 0.0324224 |
| P19367 | HK1      | Hexokinase-1 OS=Homo sapiens OX=9606 GN=HK1 PE=1                                                                                                    | 38.604144 | 35 | 54 | 33 | 917  | 102.42  | 6.8   | 75.7 | 82.6  | 88.9 | 102.7 | 125.9 | 124.2 | 82.4      | 117.6     | 0.7006803 | 0.0137067 |
| Q96IX5 | USMG5    | Up-regulated during skeletal muscle growth protein 5 OS=Homo sapiens OX=9606 GN=USMG5 PE=1 SV=1                                                     | 43.103448 | 2  | 3  | 2  | 58   | 6.453   | 9.76  | 88.1 | 81.2  | 77.7 | 115.3 | 116.6 | 121.2 | 82.333333 | 117.7     | 0.6995185 | 0.0005646 |
| Q16864 | ATP6V1F  | V-type proton ATPase subunit F OS=Homo sapiens OX=9606 GN=ATP6V1F PE=1 SV=2                                                                         | 14.285714 | 2  | 3  | 2  | 119  | 13.362  | 5.52  | 77.1 | 83.8  | 85.9 | 110.6 | 112   | 130.6 | 82.266667 | 117.73333 | 0.6987542 | 0.0070419 |
| Q9Y2J8 | PADI2    | Protein-arginine deiminase type-2 OS=Homo sapiens OX=9606 GN=PADI2 PE=1 SV=2                                                                        | 18.947368 | 9  | 12 | 9  | 665  | 75.515  | 5.59  | 72.6 | 98.4  | 75.7 | 128.7 | 122.7 | 101.8 | 82.233333 | 117.73333 | 0.6984711 | 0.036832  |
| P20674 | COX5A    | Cytochrome c oxidase subunit 5A, mitochondrial OS=Homo sapiens OX=9606 GN=COX5A PE=1 SV=2                                                           | 46.666667 | 6  | 9  | 6  | 150  | 16.752  | 6.79  | 81.1 | 80.2  | 85.4 | 104.6 | 127.5 | 121.2 | 82.233333 | 117.76667 | 0.6982734 | 0.0071568 |
| O15020 | SPTBN2   | Spectrin beta chain, non-erythrocytic 2 OS=Homo sapiens OX=9606 GN=SPTBN2 PE=1 SV=3                                                                 | 24.686192 | 53 | 80 | 40 | 2390 | 271.157 | 6.11  | 77.9 | 85.1  | 83.7 | 116.3 | 135.6 | 101.5 | 82.233333 | 117.8     | 0.6980758 | 0.0245364 |
| P78324 | SIRPA    | Tyrosine-protein phosphatase non-receptor type substrate 1 OS=Homo sapiens OX=9606 GN=SIRPA PE=1 SV=2                                               | 16.269841 | 7  | 8  | 7  | 504  | 54.933  | 6.98  | 74.5 | 97.7  | 74.3 | 116.7 | 125.9 | 110.9 | 82.166667 | 117.83333 | 0.6973126 | 0.0160925 |
| O14880 | MGST3    | Microsomal glutathione S-transferase 3 OS=Homo sapiens OX=9606 GN=MGST3 PE=1 SV=1                                                                   | 14.473684 | 2  | 6  | 2  | 152  | 16.506  | 9.38  | 84.3 | 76.3  | 85.9 | 111.2 | 130.8 | 111.5 | 82.166667 | 117.83333 | 0.6973126 | 0.0074838 |
| P08247 | SYP      | Synaptophysin OS=Homo sapiens OX=9606 GN=SYP PE=1 SV=3                                                                                              | 6.3897764 | 2  | 3  | 2  | 313  | 33.823  | 4.81  | 72.2 | 88.5  | 85.7 | 109.1 | 126.3 | 118.1 | 82.133333 | 117.83333 | 0.6970297 | 0.0072355 |
| Q9UPQ0 | LIMCH1   | LIM and calponin homology domains-containing protein 1 OS=Homo sapiens OX=9606 GN=LIMCH1 PE=1 SV=4                                                  | 18.836565 | 18 | 19 | 18 | 1083 | 121.792 | 6.47  | 84.5 | 84.8  | 77.1 | 107.5 | 142   | 104.1 | 82.133333 | 117.86667 | 0.6968326 | 0.044575  |
| P55011 | SLC12A2  | Solute carrier family 12 member 2 OS=Homo sapiens OX=9606 GN=SLC12A2 PE=1 SV=1                                                                      | 19.059406 | 20 | 25 | 20 | 1212 | 131.364 | 6.4   | 76.4 | 91.7  | 78.2 | 110.8 | 138.6 | 104.2 | 82.1      | 117.86667 | 0.6965498 | 0.0367496 |
| O75947 | ATP5H    | ATP synthase subunit d, mitochondrial OS=Homo sapiens OX=9606 GN=ATP5H PE=1 SV=3                                                                    | 76.397516 | 11 | 22 | 11 | 161  | 18.479  | 5.3   | 88.8 | 79    | 78.5 | 116.6 | 128.6 | 108.5 | 82.1      | 117.9     | 0.6963528 | 0.0060173 |
| P07101 | TH       | Tyrosine 3-monooxygenase OS=Homo sapiens OX=9606 GN=TH PE=1 SV=5                                                                                    | 30.681818 | 9  | 10 | 9  | 528  | 58.564  | 6.3   | 79.4 | 78.6  | 88.2 | 107.4 | 106.1 | 140.2 | 82.066667 | 117.9     | 0.6960701 | 0.0363464 |



|        |          |                                                                                                                                                                                                               |           |    |    |    |      |         |       |      |      |      |       |       |       |           |           |           |           |
|--------|----------|---------------------------------------------------------------------------------------------------------------------------------------------------------------------------------------------------------------|-----------|----|----|----|------|---------|-------|------|------|------|-------|-------|-------|-----------|-----------|-----------|-----------|
| Q9BPX6 | MICU1    | Calcium uptake protein 1, mitochondrial OS=Homo sapiens<br>OX=9606 GN=MICU1 PE=1 SV=1                                                                                                                         | 1.4705882 | 1  | 1  | 1  | 476  | 54.316  | 8.41  | 78.5 | 86.3 | 81.1 | 110   | 126.5 | 117.5 | 81.966667 | 118       | 0.6946328 | 0.0024315 |
| Q643R3 | LPCAT4   | Lysophospholipid acyltransferase LPCAT4 OS=Homo sapiens<br>OX=9606 GN=LPCAT4 PE=1 SV=1                                                                                                                        | 2.480916  | 1  | 1  | 1  | 524  | 57.183  | 8.97  | 80.1 | 85.7 | 80.1 | 112.9 | 121.6 | 119.6 | 81.966667 | 118.03333 | 0.6944366 | 0.0003643 |
| Q13555 | CAMK2G   | Calcium/calmodulin-dependent protein kinase type II subunit<br>gamma OS=Homo sapiens OX=9606 GN=CAMK2G PE=1<br>2-oxoglutarate dehydrogenase-like, mitochondrial OS=Homo<br>sapiens OX=9606 GN=OGDHL PE=1 SV=3 | 23.11828  | 10 | 19 | 6  | 558  | 62.568  | 7.83  | 78.9 | 85   | 81.2 | 110   | 136.6 | 108.2 | 81.7      | 118.26667 | 0.6908117 | 0.0173937 |
| Q9ULD0 | OGDHL    | ATP-dependent 6-phosphofructokinase, platelet type<br>OS=Homo sapiens OX=9606 GN=PFKP PE=1 SV=2                                                                                                               | 12.574257 | 12 | 15 | 6  | 1010 | 114.409 | 6.65  | 75.8 | 81.8 | 87.1 | 111   | 115.8 | 128.4 | 81.566667 | 118.4     | 0.6889077 | 0.0038615 |
| Q01813 | PFKP     | Ferrochelatase, mitochondrial OS=Homo sapiens OX=9606<br>GN=FECH PE=1 SV=2                                                                                                                                    | 39.030612 | 25 | 43 | 22 | 784  | 85.542  | 7.55  | 80   | 77.7 | 87   | 109.4 | 122.3 | 123.6 | 81.566667 | 118.43333 | 0.6887138 | 0.0022854 |
| P22830 | FECH     | Pyruvate dehydrogenase protein X component, mitochondrial<br>OS=Homo sapiens OX=9606 GN=PDHX PE=1 SV=3                                                                                                        | 9.2198582 | 4  | 5  | 4  | 423  | 47.832  | 8.73  | 86.2 | 85.4 | 72.8 | 128   | 133.7 | 93.9  | 81.466667 | 118.53333 | 0.6872891 | 0.048014  |
| O00330 | PDHX     | Keratinocyte-associated protein 2 OS=Homo sapiens<br>OX=9606 GN=KRTCAP2 PE=1 SV=2                                                                                                                             | 10.379242 | 5  | 5  | 5  | 501  | 54.089  | 8.66  | 79.2 | 72.5 | 92.6 | 118.1 | 129.1 | 108.6 | 81.433333 | 118.6     | 0.6866217 | 0.0113135 |
| Q8N6L1 | KRTCAP2  | Regulator of G-protein signaling 3 OS=Homo sapiens<br>OX=9606 GN=RGS3 PE=1 SV=2                                                                                                                               | 12.5      | 1  | 2  | 1  | 136  | 14.669  | 9.61  | 80.4 | 81.5 | 82.4 | 124.4 | 123   | 108.4 | 81.433333 | 118.6     | 0.6866217 | 0.0019529 |
| P49796 | RGS3     | NADH dehydrogenase [ubiquinone] 1 beta subcomplex subunit<br>8, mitochondrial OS=Homo sapiens OX=9606 GN=NDUFB8<br>PE=1 SV=1                                                                                  | 1.6694491 | 2  | 2  | 2  | 1198 | 132.252 | 6.28  | 75.1 | 91.2 | 77.6 | 102.9 | 109.9 | 143.3 | 81.3      | 118.7     | 0.68492   | 0.0495866 |
| O95169 | NDUFB8   | Calcium uniporter protein, mitochondrial OS=Homo sapiens<br>OX=9606 GN=MCU PE=1 SV=1                                                                                                                          | 20.430108 | 3  | 3  | 3  | 186  | 21.751  | 6.8   | 77.7 | 79.8 | 86.2 | 96.4  | 129.6 | 130.3 | 81.233333 | 118.76667 | 0.6839742 | 0.0307517 |
| Q8NE86 | MCU      | Phosphorylase b kinase regulatory subunit alpha, liver isoform<br>OS=Homo sapiens OX=9606 GN=PHKA2 PE=1 SV=1                                                                                                  | 11.396011 | 3  | 4  | 3  | 351  | 39.842  | 8.65  | 78.8 | 81.2 | 83.6 | 104.9 | 128.1 | 123.4 | 81.2      | 118.8     | 0.6835017 | 0.0064671 |
| P46019 | PHKA2    | Gap junction beta-1 protein OS=Homo sapiens OX=9606<br>GN=GJB1 PE=1 SV=1                                                                                                                                      | 0.6477733 | 2  | 2  | 2  | 1235 | 138.32  | 6.44  | 83.2 | 82.3 | 78.1 | 117.5 | 132.3 | 106.7 | 81.2      | 118.83333 | 0.68331   | 0.0076966 |
| P08034 | GJB1     | Fibroblast growth factor 1 OS=Homo sapiens OX=9606<br>GN=FGF1 PE=1 SV=1                                                                                                                                       | 8.8339223 | 3  | 3  | 3  | 283  | 32.004  | 8.94  | 80.1 | 88.2 | 75   | 126.6 | 129.2 | 100.9 | 81.1      | 118.9     | 0.6820858 | 0.0182828 |
| P05230 | FGF1     | MICOS complex subunit MIC26 OS=Homo sapiens OX=9606<br>GN=APOO PE=1 SV=1                                                                                                                                      | 36.129032 | 5  | 11 | 5  | 155  | 17.449  | 7.02  | 73.3 | 96.6 | 73   | 132.9 | 113.4 | 110.7 | 80.966667 | 119       | 0.6803922 | 0.0222377 |
| Q9BUR5 | APOO     | Calcium/calmodulin-dependent protein kinase type II subunit<br>beta OS=Homo sapiens OX=9606 GN=CAMK2B PE=1 SV=3                                                                                               | 23.232323 | 3  | 3  | 3  | 198  | 22.271  | 9.13  | 84.1 | 81.2 | 77.6 | 112.7 | 136.5 | 107.9 | 80.966667 | 119.03333 | 0.6802016 | 0.0135773 |
| Q13554 | CAMK2B   | ADP/ATP translocase 1 OS=Homo sapiens OX=9606<br>GN=SLC25A4 PE=1 SV=4                                                                                                                                         | 19.369369 | 10 | 16 | 5  | 666  | 72.632  | 7.27  | 77.1 | 88.7 | 77   | 113.4 | 142.2 | 101.6 | 80.933333 | 119.06667 | 0.6797312 | 0.03954   |
| P12235 | SLC25A4  | Cytochrome c oxidase subunit NDUFA4 OS=Homo sapiens<br>OX=9606 GN=NDUFA4 PE=1 SV=1                                                                                                                            | 53.355705 | 17 | 26 | 5  | 298  | 33.043  | 9.76  | 75.8 | 86.8 | 79.7 | 142.2 | 103   | 112.6 | 80.766667 | 119.26667 | 0.677194  | 0.0345663 |
| O00483 | NDUFA4   | Synapsin-2 OS=Homo sapiens OX=9606 GN=SYN2 PE=2<br>Cytoplasmic dynein 1 intermediate chain 1 OS=Homo sapiens                                                                                                  | 55.555556 | 5  | 8  | 5  | 81   | 9.364   | 9.38  | 80.8 | 84   | 77.4 | 111.1 | 114.7 | 132   | 80.733333 | 119.26667 | 0.6769145 | 0.0045973 |
| Q92777 | SYN2     | Protein rogdi homolog OS=Homo sapiens OX=9606<br>GN=ROGDI PE=1 SV=1                                                                                                                                           | 14.089347 | 7  | 9  | 7  | 582  | 62.957  | 8.41  | 75.6 | 77.2 | 89.3 | 96.1  | 122.7 | 139.1 | 80.7      | 119.3     | 0.6764459 | 0.0435794 |
| O14576 | DYNC111  | Masparidin OS=Homo sapiens OX=9606 GN=SPG21 PE=1<br>Dysferlin OS=Homo sapiens OX=9606 GN=DYSF PE=1 SV=1                                                                                                       | 24.496124 | 10 | 10 | 9  | 645  | 72.91   | 5.12  | 76.4 | 77.4 | 88.2 | 110.4 | 136.7 | 110.9 | 80.666667 | 119.33333 | 0.6759777 | 0.0150636 |
| Q9NZD8 | SPG21    | Protein rogdi homolog OS=Homo sapiens OX=9606<br>GN=ROGDI PE=1 SV=1                                                                                                                                           | 5.8441558 | 1  | 1  | 1  | 308  | 34.938  | 6.28  | 90.9 | 77.2 | 73.9 | 129.3 | 114.1 | 114.6 | 80.666667 | 119.33333 | 0.6759777 | 0.0058265 |
| O75923 | DYSF     | Protein rogdi homolog OS=Homo sapiens OX=9606<br>GN=ROGDI PE=1 SV=1                                                                                                                                           | 12.788462 | 21 | 26 | 20 | 2080 | 237.144 | 5.64  | 72.2 | 83.2 | 85   | 112.6 | 125.7 | 121.2 | 80.133333 | 119.83333 | 0.6687065 | 0.0020174 |
| Q9GZN7 | ROGDI    | Protein 4.1 OS=Homo sapiens OX=9606 GN=EPB41 PE=1<br>Ganglioside-induced differentiation-associated protein 1                                                                                                 | 7.3170732 | 2  | 2  | 2  | 287  | 32.234  | 8.16  | 78.8 | 81   | 80.3 | 97    | 124.5 | 138.4 | 80.033333 | 119.96667 | 0.6671298 | 0.0305525 |
| P11171 | EPB41    | OS=Homo sapiens OX=9606 GN=GDAP1 PE=1 SV=3                                                                                                                                                                    | 13.310185 | 10 | 17 | 7  | 864  | 96.957  | 5.58  | 80.4 | 80.4 | 78.5 | 115.6 | 138.9 | 106.2 | 79.766667 | 120.23333 | 0.6634322 | 0.0142082 |
| Q8TB36 | GDAP1    | Single-pass membrane and coiled-coil domain-containing<br>protein 3 OS=Homo sapiens OX=9606 GN=SMCO3 PE=1                                                                                                     | 13.128492 | 5  | 6  | 5  | 358  | 41.32   | 8.34  | 72.9 | 81.9 | 84.2 | 102.5 | 136.8 | 121.5 | 79.666667 | 120.26667 | 0.6624169 | 0.0180604 |
| A2RU48 | SMCO3    | Long-chain-fatty-acid--CoA ligase 6 OS=Homo sapiens<br>OX=9606 GN=ACSL6 PE=2 SV=4                                                                                                                             | 3.5555556 | 1  | 1  | 1  | 225  | 24.861  | 8.22  | 81.5 | 84.3 | 73.2 | 115.8 | 142.8 | 102.3 | 79.666667 | 120.3     | 0.6622333 | 0.0303139 |
| Q9UKU0 | ACSL6    | Mammalian ependymin-related protein 1 OS=Homo sapiens<br>OX=9606 GN=EPDR1 PE=1 SV=2                                                                                                                           | 8.7517934 | 5  | 6  | 5  | 697  | 77.702  | 7.43  | 78   | 85   | 75.6 | 114.2 | 138.5 | 108.6 | 79.533333 | 120.43333 | 0.660393  | 0.0130506 |
| Q9UM22 | EPDR1    | GTPase HRas OS=Homo sapiens OX=9606 GN=HRAS PE=1<br>SV=1                                                                                                                                                      | 15.178571 | 3  | 4  | 3  | 224  | 25.421  | 6.6   | 67.4 | 72.8 | 98.4 | 114.5 | 120   | 126.9 | 79.533333 | 120.46667 | 0.6602103 | 0.0160186 |
| P01112 | HRAS     | V-type proton ATPase subunit G 2 OS=Homo sapiens<br>OX=9606 GN=ATP6V1G2 PE=1 SV=1                                                                                                                             | 69.84127  | 9  | 15 | 2  | 189  | 21.285  | 5.31  | 76.1 | 78.1 | 84   | 116.6 | 146   | 99.2  | 79.4      | 120.6     | 0.6583748 | 0.0410529 |
| O95670 | ATP6V1G2 | Succinate-semialdehyde dehydrogenase, mitochondrial<br>OS=Homo sapiens OX=9606 GN=ALDH5A1 PE=1 SV=2                                                                                                           | 48.305085 | 4  | 5  | 3  | 118  | 13.596  | 10.26 | 70.7 | 88.7 | 78.1 | 109.8 | 132.6 | 120.1 | 79.166667 | 120.83333 | 0.6551724 | 0.0077389 |
| P51649 | ALDH5A1  | Plasmolipin OS=Homo sapiens OX=9606 GN=PLLP PE=1<br>Unconventional myosin-Ib OS=Homo sapiens OX=9606                                                                                                          | 14.766355 | 7  | 8  | 7  | 535  | 57.178  | 8.28  | 79.4 | 84.2 | 73.5 | 137.1 | 131.5 | 94.3  | 79.033333 | 120.96667 | 0.653348  | 0.0383106 |
| Q9Y342 | PLLP     | Dynein light chain 1, cytoplasmic OS=Homo sapiens OX=9606<br>GN=MYO1B PE=1 SV=3                                                                                                                               | 25.824176 | 3  | 22 | 3  | 182  | 19.973  | 9.36  | 82.1 | 79.6 | 75.3 | 122.7 | 145.2 | 95    | 79        | 120.96667 | 0.6530725 | 0.0457391 |
| O43795 | MYO1B    | OS=Homo sapiens OX=9606 GN=CDH1 PE=1<br>Breast carcinoma-amplified sequence 1 OS=Homo sapiens                                                                                                                 | 26.760563 | 30 | 45 | 30 | 1136 | 131.902 | 9.38  | 77.8 | 80.4 | 78.3 | 129.2 | 139.4 | 94.9  | 78.833333 | 121.16667 | 0.650619  | 0.0348552 |
| P63167 | DYNLL1   | GN=DYNLL1 PE=1 SV=1                                                                                                                                                                                           | 44.94382  | 3  | 12 | 2  | 89   | 10.359  | 7.4   | 82.6 | 84.7 | 68.6 | 122.4 | 144   | 97.6  | 78.633333 | 121.33333 | 0.6480769 | 0.0407143 |
| P12830 | CDH1     | OX=9606 GN=BCAS1 PE=1 SV=2                                                                                                                                                                                    | 18.367347 | 10 | 14 | 10 | 882  | 97.396  | 4.73  | 78.9 | 79.4 | 77.2 | 117.1 | 143   | 104.5 | 78.5      | 121.53333 | 0.6459133 | 0.0192578 |
| O75363 | BCAS1    | Synaptosomal-associated protein 25 OS=Homo sapiens<br>OX=9606 GN=SNAP25 PE=1 SV=1                                                                                                                             | 17.123288 | 10 | 24 | 10 | 584  | 61.671  | 5.1   | 85.3 | 82.9 | 66   | 113.1 | 141.7 | 111.1 | 78.066667 | 121.96667 | 0.6400656 | 0.0193621 |
| P60880 | SNAP25   | Aquaporin-1 OS=Homo sapiens OX=9606 GN=AQP1 PE=1<br>Intermediate filament family orphan 1 OS=Homo sapiens                                                                                                     | 35.92233  | 7  | 9  | 7  | 206  | 23.3    | 4.77  | 67.1 | 79.5 | 87   | 102.6 | 142.9 | 120.9 | 77.866667 | 122.13333 | 0.6375546 | 0.0272468 |
| P29972 | AQP1     | OX=9606 GN=IFFO1 PE=2 SV=2                                                                                                                                                                                    | 10.037175 | 2  | 4  | 2  | 269  | 28.508  | 7.42  | 81.5 | 81.2 | 69.2 | 131.7 | 140.6 | 95.7  | 77.3      | 122.66667 | 0.630163  | 0.0338576 |
| Q0D215 | IFFO1    | Protein S100-A13 OS=Homo sapiens OX=9606 GN=S100A13<br>PE=1 SV=1                                                                                                                                              | 1.2522361 | 1  | 2  | 1  | 559  | 61.94   | 4.92  | 67.5 | 84.8 | 78   | 120.7 | 142.9 | 106.1 | 76.766667 | 123.23333 | 0.6229375 | 0.0170993 |
| Q99584 | S100A13  | Calcium/calmodulin-dependent protein kinase kinase 1<br>OS=Homo sapiens OX=9606 GN=CAMKK1 PE=1 SV=2                                                                                                           | 47.959184 | 5  | 12 | 5  | 98   | 11.464  | 6.16  | 73.1 | 77.5 | 79.4 | 121.1 | 132.3 | 116.7 | 76.666667 | 123.36667 | 0.6214537 | 0.0007342 |
| Q8N5S9 | CAMKK1   | Amine oxidase [flavin-containing] A OS=Homo sapiens<br>OX=9606 GN=MAOA PE=1 SV=1                                                                                                                              | 2.1782178 | 1  | 1  | 1  | 505  | 55.701  | 5.78  | 71.1 | 77.5 | 81.1 | 116.3 | 120.3 | 133.7 | 76.566667 | 123.43333 | 0.6203079 | 0.0014677 |
| P21397 | MAOA     | Target of Nesh-SH3 OS=Homo sapiens OX=9606 GN=ABI3BP<br>PE=1 SV=1                                                                                                                                             | 36.242884 | 17 | 28 | 13 | 527  | 59.644  | 7.85  | 71.8 | 75.4 | 82.4 | 119.3 | 126.1 | 125   | 76.533333 | 123.46667 | 0.6198704 | 0.0002365 |
| Q7Z7G0 | ABI3BP   | Cytochrome b-c1 complex subunit 9 OS=Homo sapiens<br>OX=9606 GN=UQCR10 PE=1 SV=3                                                                                                                              | 16.186047 | 12 | 19 | 12 | 1075 | 118.569 | 9.44  | 67.5 | 75.5 | 86   | 147.5 | 111   | 112.6 | 76.333333 | 123.7     | 0.6170843 | 0.0222122 |
| Q9UDW1 | UQCR10   | Fibulin-5 OS=Homo sapiens OX=9606 GN=FBLN5 PE=1 SV=1<br>Cytochrome c oxidase subunit 8A, mitochondrial OS=Homo                                                                                                | 26.984127 | 1  | 1  | 1  | 63   | 7.304   | 9.47  | 92.9 | 81.8 | 53.6 | 123.1 | 116.2 | 132.4 | 76.1      | 123.9     | 0.614205  | 0.0192281 |
| Q9UBX5 | FBLN5    | sapiens OX=9606 GN=COX8A PE=1 SV=2                                                                                                                                                                            | 14.285714 | 6  | 9  | 6  | 448  | 50.147  | 4.73  | 76.2 | 83.3 | 68   | 132.9 | 135.5 | 104.1 | 75.833333 | 124.16667 | 0.6107383 | 0.0117087 |
| P10176 | COX8A    | Cysteine-rich and transmembrane domain-containing protein 1<br>OS=Homo sapiens OX=9606 GN=CYSTM1 PE=1 SV=1                                                                                                    | 13.043478 | 1  | 2  | 1  | 69   | 7.574   | 10.24 | 80.4 | 70.4 | 76.7 | 131.3 | 130.6 | 110.6 | 75.833333 | 124.16667 | 0.6107383 | 0.0028208 |
| Q9H1C7 | CYSTM1   |                                                                                                                                                                                                               | 10.309278 | 1  | 1  | 1  | 97   | 10.624  | 4.32  | 83.3 | 69.8 | 74   | 111.6 | 151.7 | 109.7 | 75.7      | 124.33333 | 0.6088472 | 0.0270358 |

|        |          |                                                                                                                         |           |    |     |    |      |         |      |      |      |      |       |       |       |           |            |           |           |
|--------|----------|-------------------------------------------------------------------------------------------------------------------------|-----------|----|-----|----|------|---------|------|------|------|------|-------|-------|-------|-----------|------------|-----------|-----------|
| Q86XP1 | DGKH     | Diacylglycerol kinase eta OS=Homo sapiens OX=9606<br>GN=DGKH PE=1 SV=1                                                  | 5.5737705 | 5  | 5   | 5  | 1220 | 134.78  | 6.54 | 67.5 | 80.6 | 78.1 | 101.4 | 136.1 | 136.3 | 75.4      | 124.6      | 0.6051364 | 0.0160232 |
| Q8N111 | CEND1    | Cell cycle exit and neuronal differentiation protein 1 OS=Homo sapiens OX=9606 GN=CEND1 PE=1 SV=1                       | 32.214765 | 5  | 7   | 5  | 149  | 14.945  | 9.2  | 67.8 | 78.2 | 80.1 | 104.3 | 145.2 | 124.4 | 75.366667 | 124.633333 | 0.6047071 | 0.0165435 |
| P28907 | CD38     | ADP-ribosyl cyclase/cyclic ADP-ribose hydrolase 1 OS=Homo sapiens OX=9606 GN=CD38 PE=1 SV=2                             | 5.6666667 | 2  | 2   | 2  | 300  | 34.306  | 7.66 | 78.6 | 78   | 69.1 | 127.7 | 147.8 | 98.9  | 75.233333 | 124.8      | 0.6028312 | 0.0269308 |
| Q8NHG7 | SVIP     | Small VCP/p97-interacting protein OS=Homo sapiens OX=9606 GN=SVIP PE=1 SV=1                                             | 41.558442 | 3  | 14  | 3  | 77   | 8.437   | 8.91 | 71.1 | 76.9 | 75.9 | 115.5 | 159.9 | 100.6 | 74.633333 | 125.333333 | 0.5954787 | 0.0472317 |
| P09471 | GNAO1    | Guanine nucleotide-binding protein G(o) subunit alpha OS=Homo sapiens OX=9606 GN=GNAO1 PE=1 SV=4                        | 44.067797 | 14 | 42  | 13 | 354  | 40.025  | 5.53 | 64.8 | 79.7 | 78.8 | 116.8 | 146.6 | 113.3 | 74.433333 | 125.56667  | 0.5927794 | 0.0116669 |
| Q2KHM9 | KIAA0753 | Protein moonraker OS=Homo sapiens OX=9606 GN=KIAA0753 PE=1 SV=3                                                         | 0.8273009 | 1  | 1   | 1  | 967  | 109.339 | 7.68 | 78.7 | 73.2 | 70.8 | 121.1 | 149.9 | 106.3 | 74.233333 | 125.76667  | 0.5902465 | 0.0166736 |
| Q8N145 | LGI3     | Leucine-rich repeat LGI family member 3 OS=Homo sapiens OX=9606 GN=LGI3 PE=2 SV=1                                       | 4.379562  | 2  | 2   | 2  | 548  | 61.665  | 7.91 | 71.9 | 80.5 | 69.2 | 118.3 | 151.9 | 108.2 | 73.866667 | 126.133333 | 0.5856237 | 0.0185948 |
| P21579 | SYT1     | Synaptotagmin-1 OS=Homo sapiens OX=9606 GN=SYT1 PE=1 SV=1                                                               | 17.535545 | 8  | 8   | 5  | 422  | 47.543  | 8.12 | 60.9 | 69.6 | 90.5 | 94.4  | 135.5 | 149.1 | 73.666667 | 126.333333 | 0.5831135 | 0.0475724 |
| Q6ZWB6 | KCTD8    | BTB/POZ domain-containing protein KCTD8 OS=Homo sapiens OX=9606 GN=KCTD8 PE=2 SV=1                                      | 4.8625793 | 2  | 3   | 1  | 473  | 52.407  | 8.37 | 68   | 72.8 | 79.7 | 110.4 | 144   | 125.1 | 73.5      | 126.5      | 0.5810277 | 0.006766  |
| Q99732 | LITAF    | Lipopolysaccharide-induced tumor necrosis factor-alpha factor OS=Homo sapiens OX=9606 GN=LITAF PE=1 SV=2                | 4.3478261 | 1  | 1   | 1  | 161  | 17.095  | 6.44 | 78   | 73   | 69.5 | 138.9 | 140.5 | 100.1 | 73.5      | 126.5      | 0.5810277 | 0.0168957 |
| O94760 | DDAH1    | N(G),N(G)-dimethylarginine dimethylaminohydrolase 1 OS=Homo sapiens OX=9606 GN=DDAH1 PE=1 SV=3                          | 82.105263 | 19 | 48  | 18 | 285  | 31.102  | 5.81 | 65.5 | 75.2 | 79.5 | 133.4 | 154.9 | 91.4  | 73.4      | 126.56667  | 0.5799315 | 0.0496411 |
| Q9UQM7 | CAMK2A   | Calcium/calmodulin-dependent protein kinase type II subunit alpha OS=Homo sapiens OX=9606 GN=CAMK2A PE=1 SV=2           | 19.665272 | 9  | 16  | 4  | 478  | 54.054  | 7.08 | 64.6 | 75.3 | 78.6 | 111.1 | 142   | 128.5 | 72.833333 | 127.2      | 0.5725891 | 0.0053413 |
| P60033 | CD81     | CD81 antigen OS=Homo sapiens OX=9606 GN=CD81 PE=1 SV=1                                                                  | 30.932203 | 5  | 20  | 5  | 236  | 25.792  | 5.29 | 76.9 | 72.6 | 68.8 | 141.6 | 143.1 | 96.9  | 72.766667 | 127.2      | 0.572065  | 0.0238104 |
| Q8NFK1 | GJC3     | Gap junction gamma-3 protein OS=Homo sapiens OX=9606 GN=GJC3 PE=2 SV=1                                                  | 28.673835 | 6  | 7   | 6  | 279  | 31.279  | 9.17 | 73.7 | 84.3 | 60.2 | 138.3 | 131.3 | 112.3 | 72.733333 | 127.3      | 0.5713538 | 0.0063954 |
| P63096 | GNAI1    | Guanine nucleotide-binding protein G(i) subunit alpha-1 OS=Homo sapiens OX=9606 GN=GNAI1 PE=1 SV=2                      | 53.389831 | 14 | 45  | 7  | 354  | 40.335  | 5.97 | 81.4 | 67.1 | 69.4 | 144.6 | 148.5 | 89.1  | 72.633333 | 127.4      | 0.5701204 | 0.0497355 |
| P20337 | RAB3B    | Ras-related protein Rab-3B OS=Homo sapiens OX=9606 GN=RAB3B PE=1 SV=2                                                   | 21.917808 | 4  | 9   | 1  | 219  | 24.742  | 5.02 | 63.9 | 75.8 | 77.2 | 102.8 | 134.5 | 145.9 | 72.3      | 127.733333 | 0.566023  | 0.0150239 |
| Q16854 | DGUOK    | Deoxyguanosine kinase, mitochondrial OS=Homo sapiens OX=9606 GN=DGUOK PE=1 SV=2                                         | 3.2490975 | 1  | 1   | 1  | 277  | 32.036  | 8.66 | 66.2 | 79.9 | 68.5 | 107.3 | 156   | 121.9 | 71.533333 | 128.4      | 0.5571132 | 0.0194106 |
| P02461 | COL3A1   | Collagen alpha-1(III) chain OS=Homo sapiens OX=9606 GN=COL3A1 PE=1 SV=4                                                 | 6.6166439 | 8  | 12  | 8  | 1466 | 138.479 | 6.61 | 61.5 | 83.8 | 68.8 | 117.7 | 161.3 | 106.8 | 71.366667 | 128.6      | 0.5549508 | 0.0329672 |
| Q5U651 | RASIP1   | Ras-interacting protein 1 OS=Homo sapiens OX=9606 GN=RASIP1 PE=1 SV=1                                                   | 0.9345794 | 1  | 1   | 1  | 963  | 103.393 | 7.96 | 67.1 | 69.8 | 76   | 118.6 | 144.9 | 123.6 | 70.966667 | 129.033333 | 0.5499871 | 0.0023837 |
| Q9NQ29 | LUC7L    | Putative RNA-binding protein Luc7-like 1 OS=Homo sapiens OX=9606 GN=LUC7L PE=1 SV=1                                     | 9.9730458 | 4  | 5   | 1  | 371  | 43.701  | 9.92 | 63.2 | 90   | 58.4 | 104.7 | 160.5 | 123.3 | 70.533333 | 129.5      | 0.5446589 | 0.0368118 |
| O95741 | CPNE6    | Copine-6 OS=Homo sapiens OX=9606 GN=CPNE6 PE=1 SV=2                                                                     | 44.524237 | 20 | 27  | 19 | 557  | 61.952  | 5.52 | 67.5 | 70.8 | 72.9 | 123.7 | 160.5 | 104.4 | 70.4      | 129.533333 | 0.5434894 | 0.0232234 |
| Q14571 | ITPR2    | Inositol 1,4,5-trisphosphate receptor type 2 OS=Homo sapiens OX=9606 GN=ITPR2 PE=1 SV=2                                 | 5.9607553 | 16 | 19  | 10 | 2701 | 307.867 | 6.43 | 71.4 | 77   | 62.5 | 128.6 | 155   | 105.4 | 70.3      | 129.66667  | 0.5421594 | 0.0164779 |
| Q14CB8 | ARHGAP19 | Rho GTPase-activating protein 19 OS=Homo sapiens OX=9606 GN=ARHGAP19 PE=1 SV=1                                          | 7.4898785 | 3  | 5   | 3  | 494  | 55.721  | 9.36 | 72.9 | 71.6 | 66.1 | 136.6 | 162.9 | 89.9  | 70.2      | 129.8      | 0.540832  | 0.0498744 |
| P32969 | RPL9     | 60S ribosomal protein L9 OS=Homo sapiens OX=9606 GN=RPL9 PE=1 SV=1                                                      | 50        | 8  | 17  | 8  | 192  | 21.85   | 9.95 | 71.2 | 71.4 | 62.9 | 127.3 | 157.7 | 109.4 | 68.5      | 131.46667  | 0.5210446 | 0.0118674 |
| Q8N490 | PNKD     | Probable hydrolase PNKD OS=Homo sapiens OX=9606 GN=PNKD PE=1 SV=2                                                       | 2.0779221 | 1  | 1   | 1  | 385  | 42.849  | 9.09 | 61.5 | 73.9 | 67.7 | 126.2 | 157.5 | 113.2 | 67.7      | 132.3      | 0.5117158 | 0.00903   |
| P02689 | PMP2     | Myelin P2 protein OS=Homo sapiens OX=9606 GN=PMP2 PE=1 SV=3                                                             | 72.727273 | 12 | 97  | 10 | 132  | 14.9    | 9.83 | 57.1 | 77.1 | 68.6 | 129.5 | 159.6 | 108.1 | 67.6      | 132.4      | 0.510574  | 0.0155471 |
| Q9BWQ8 | FAIM2    | Protein lifeguard 2 OS=Homo sapiens OX=9606 GN=FAIM2 PE=1 SV=1                                                          | 4.4303797 | 1  | 1   | 1  | 316  | 35.087  | 6.52 | 61.5 | 75   | 66   | 123.4 | 168.6 | 105.4 | 67.5      | 132.46667  | 0.5095622 | 0.0277515 |
| P60201 | PLP1     | Myelin proteolipid protein OS=Homo sapiens OX=9606 GN=PLP1 PE=1 SV=2                                                    | 29.241877 | 8  | 30  | 8  | 277  | 30.057  | 8.35 | 70.8 | 72.3 | 57.9 | 149.3 | 148.4 | 101.3 | 67        | 133        | 0.5037594 | 0.0161232 |
| P09172 | DBH      | Dopamine beta-hydroxylase OS=Homo sapiens OX=9606 GN=DBH PE=1 SV=3                                                      | 5.1863857 | 3  | 4   | 3  | 617  | 69.021  | 6.42 | 61.1 | 76.4 | 60.6 | 116.1 | 127.3 | 158.5 | 66.033333 | 133.96667  | 0.4929087 | 0.0077225 |
| P12036 | NEFH     | Neurofilament heavy polypeptide OS=Homo sapiens OX=9606 GN=NEFH PE=1 SV=4                                               | 32.651072 | 37 | 115 | 33 | 1026 | 112.411 | 6.18 | 72.3 | 66.3 | 56   | 128   | 171.3 | 106.1 | 64.866667 | 135.133333 | 0.4800197 | 0.0235906 |
| Q9NUT2 | ABCB8    | ATP-binding cassette sub-family B member 8, mitochondrial OS=Homo sapiens OX=9606 GN=ABCB8 PE=1 SV=3                    | 4.0816327 | 3  | 4   | 2  | 735  | 79.938  | 8.98 | 66.6 | 73   | 52.5 | 156.1 | 149.1 | 102.7 | 64.033333 | 135.96667  | 0.4709488 | 0.0156361 |
| P0DP58 | LYNX1    | Ly-6/neurotoxin-like protein 1 OS=Homo sapiens OX=9606 GN=LYNX1 PE=1 SV=1                                               | 15.517241 | 2  | 2   | 2  | 116  | 12.632  | 7.8  | 60   | 62.7 | 69   | 121.7 | 167   | 119.5 | 63.9      | 136.06667  | 0.4696227 | 0.0100737 |
| Q9BXM0 | PRX      | Periaxin OS=Homo sapiens OX=9606 GN=PRX PE=1 SV=2                                                                       | 60.095825 | 71 | 546 | 71 | 1461 | 154.807 | 7.5  | 61.7 | 68.8 | 58.7 | 136.7 | 176.8 | 97.3  | 63.066667 | 136.933333 | 0.4605648 | 0.0331674 |
| P17152 | TMEM11   | Transmembrane protein 11, mitochondrial OS=Homo sapiens OX=9606 GN=TMEM11 PE=1 SV=1                                     | 9.8958333 | 2  | 2   | 2  | 192  | 21.527  | 7.36 | 60.3 | 67.3 | 59.5 | 138.8 | 163.8 | 110.2 | 62.366667 | 137.6      | 0.4532461 | 0.0086635 |
| P08473 | MME      | Nephrilysin OS=Homo sapiens OX=9606 GN=MME PE=1 SV=2                                                                    | 41.866667 | 28 | 52  | 28 | 750  | 85.46   | 5.73 | 58.2 | 74.2 | 54.2 | 123.2 | 189   | 101.3 | 62.2      | 137.833333 | 0.4512696 | 0.0490183 |
| P25189 | MPZ      | Myelin protein P0 OS=Homo sapiens OX=9606 GN=MPZ PE=1 SV=1                                                              | 60.887097 | 23 | 354 | 23 | 248  | 27.537  | 9.54 | 56.8 | 72.7 | 55.7 | 132.3 | 181.3 | 101.2 | 61.733333 | 138.26667  | 0.4464802 | 0.0330525 |
| Q9GZU7 | CTDSP1   | Carboxy-terminal domain RNA polymerase II polypeptide A small phosphatase 1 OS=Homo sapiens OX=9606 GN=CTDSP1 PE=1 SV=1 | 7.6628352 | 2  | 2   | 2  | 261  | 29.185  | 6    | 59   | 69.5 | 45.4 | 138.5 | 191.6 | 96.1  | 57.966667 | 142.06667  | 0.4080244 | 0.0419039 |
| P52298 | NCBP2    | Nuclear cap-binding protein subunit 2 OS=Homo sapiens OX=9606 GN=NCBP2 PE=1 SV=1                                        | 4.4871795 | 1  | 1   | 1  | 156  | 17.99   | 8.21 | 44.1 | 59.6 | 38.6 | 153.4 | 203.4 | 100.8 | 47.433333 | 152.533333 | 0.3109703 | 0.0255647 |
| P13760 | HLA-DRB1 | HLA class II histocompatibility antigen, DRB1-4 beta chain OS=Homo sapiens OX=9606 GN=HLA-DRB1 PE=1 SV=1                | 28.947368 | 7  | 10  | 1  | 266  | 30.093  | 7.18 | 46.8 | 47.4 | 43.9 | 153.2 | 97    | 211.6 | 46.033333 | 153.933333 | 0.2990472 | 0.0310915 |
| Q8N6Q3 | CD177    | CD177 antigen OS=Homo sapiens OX=9606 GN=CD177 PE=1 SV=2                                                                | 2.7459954 | 1  | 1   | 1  | 437  | 46.332  | 6.29 | 48.5 | 58.6 | 22.1 | 189.5 | 193.3 | 88    | 43.066667 | 156.933333 | 0.2744265 | 0.0345487 |
