# Supplementary material for: The circ_0002538/miR-138-5p/plasmolipin axis regulates Schwann cell migration and myelination in diabetic peripheral neuropathy
Source: PubMed Central journal article supplement — Neural Regen Res. 2022 Oct 11;18(7):1591–600. doi: 10.4103/1673-5374.355979 (PMC10075099; doi:10.4103/1673-5374.355979), 2022-10-11
Supplement: NRR-18-1591_Suppl2.pdf [file NRR-18-1591_Suppl2.pdf]

**Additional Table 6 GO biological process analysis of differentially expressed proteins**

| GO_P Term ID | GO_P Term Desc                                                                             | GO_P Term Level1   | GO_P Term Level2                 | Term Candidate Gene Num | Total Candidate Gene Num | Term Gene Num | Total Gene Num | Rich Ratio | P value    | Q value    |
|--------------|--------------------------------------------------------------------------------------------|--------------------|----------------------------------|-------------------------|--------------------------|---------------|----------------|------------|------------|------------|
| GO:0015853   | adenine transport                                                                          | biological_process | localization                     | 3                       | 252                      | 5             | 24363          | 0.6        | 1.08E-05   | 0.01453527 |
| GO:0055114   | oxidation-reduction process                                                                | biological_process | metabolic process                | 22                      | 252                      | 772           | 24363          | 0.02849741 | 1.93E-05   | 0.01453527 |
| GO:0022900   | electron transport chain                                                                   | biological_process | metabolic process                | 7                       | 252                      | 96            | 24363          | 0.07291667 | 6.35E-05   | 0.02392385 |
| GO:0042552   | myelination                                                                                | biological_process | developmental process            | 6                       | 252                      | 64            | 24363          | 0.09375    | 5.24E-05   | 0.02392385 |
| GO:0010038   | response to metal ion                                                                      | biological_process | response to stimulus             | 4                       | 252                      | 23            | 24363          | 0.17391304 | 8.48E-05   | 0.02555268 |
| GO:0014733   | regulation of skeletal muscle adaptation                                                   | biological_process | regulation of biological process | 2                       | 252                      | 2             | 24363          | 1          | 1.07E-04   | 0.02676656 |
| GO:0071276   | cellular response to cadmium ion                                                           | biological_process | response to stimulus             | 5                       | 252                      | 48            | 24363          | 0.10416667 | 1.36E-04   | 0.02917599 |
| GO:0022010   | central nervous system myelination                                                         | biological_process | multicellular organismal process | 3                       | 252                      | 11            | 24363          | 0.27272727 | 1.70E-04   | 0.02969535 |
| GO:1902600   | proton transmembrane transport                                                             | biological_process | localization                     | 7                       | 252                      | 113           | 24363          | 0.0619469  | 1.77E-04   | 0.02969535 |
| GO:0006120   | mitochondrial electron transport, NADH to ubiquinone                                       | biological_process | metabolic process                | 5                       | 252                      | 55            | 24363          | 0.09090909 | 2.60E-04   | 0.03912277 |
| GO:0018125   | peptidyl-cysteine methylation                                                              | biological_process | metabolic process                | 2                       | 252                      | 3             | 24363          | 0.66666667 | 3.18E-04   | 0.03938102 |
| GO:0019563   | glycerol catabolic process                                                                 | biological_process | metabolic process                | 3                       | 252                      | 14            | 24363          | 0.21428571 | 3.66E-04   | 0.03938102 |
| GO:0021681   | cerebellar granular layer development                                                      | biological_process | developmental process            | 2                       | 252                      | 3             | 24363          | 0.66666667 | 3.18E-04   | 0.03938102 |
| GO:0071280   | cellular response to copper ion                                                            | biological_process | response to stimulus             | 4                       | 252                      | 33            | 24363          | 0.12121212 | 3.61E-04   | 0.03938102 |
| GO:0043312   | neutrophil degranulation                                                                   | biological_process | immune system process            | 18                      | 252                      | 702           | 24363          | 0.02564103 | 4.03E-04   | 0.04051925 |
| GO:0005975   | carbohydrate metabolic process                                                             | biological_process | metabolic process                | 10                      | 252                      | 274           | 24363          | 0.03649635 | 6.04E-04   | 0.04526008 |
| GO:0006091   | generation of precursor metabolites and energy                                             | biological_process | metabolic process                | 5                       | 252                      | 63            | 24363          | 0.07936508 | 4.91E-04   | 0.04526008 |
| GO:0010273   | detoxification of copper ion                                                               | biological_process | response to stimulus             | 3                       | 252                      | 16            | 24363          | 0.1875     | 5.54E-04   | 0.04526008 |
| GO:0017085   | response to insecticide                                                                    | biological_process | response to stimulus             | 2                       | 252                      | 4             | 24363          | 0.5        | 6.31E-04   | 0.04526008 |
| GO:0042376   | phyloquinone catabolic process                                                             | biological_process | metabolic process                | 2                       | 252                      | 4             | 24363          | 0.5        | 6.31E-04   | 0.04526008 |
| GO:0071492   | cellular response to UV-A                                                                  | biological_process | response to stimulus             | 2                       | 252                      | 4             | 24363          | 0.5        | 6.31E-04   | 0.04526008 |
| GO:0050884   | neuromuscular process controlling posture                                                  | biological_process | multicellular organismal process | 3                       | 252                      | 17            | 24363          | 0.17647059 | 6.68E-04   | 0.04575431 |
| GO:0006071   | glycerol metabolic process                                                                 | biological_process | metabolic process                | 3                       | 252                      | 18            | 24363          | 0.16666667 | 7.95E-04   | 0.0461045  |
| GO:0042407   | cristae formation                                                                          | biological_process | cellular process                 | 4                       | 252                      | 40            | 24363          | 0.1        | 7.62E-04   | 0.0461045  |
| GO:0060333   | interferon-gamma-mediated signaling pathway                                                | biological_process | regulation of biological process | 8                       | 252                      | 185           | 24363          | 0.04324324 | 7.11E-04   | 0.0461045  |
| GO:2001222   | regulation of neuron migration                                                             | biological_process | developmental process            | 3                       | 252                      | 18            | 24363          | 0.16666667 | 7.95E-04   | 0.0461045  |
| GO:0017157   | regulation of exocytosis                                                                   | biological_process | regulation of biological process | 4                       | 252                      | 44            | 24363          | 0.09090909 | 0.00109636 | 0.05697265 |
| GO:0035774   | positive regulation of insulin secretion involved in cellular response to glucose stimulus | biological_process | regulation of biological process | 4                       | 252                      | 44            | 24363          | 0.09090909 | 0.00109636 | 0.05697265 |
| GO:0036018   | cellular response to erythropoietin                                                        | biological_process | response to stimulus             | 2                       | 252                      | 5             | 24363          | 0.4        | 0.00104398 | 0.05697265 |
| GO:0019882   | antigen processing and presentation                                                        | biological_process | immune system process            | 4                       | 252                      | 45            | 24363          | 0.08888889 | 0.00119364 | 0.05996057 |
| GO:0051693   | actin filament capping                                                                     | biological_process | regulation of biological process | 3                       | 252                      | 21            | 24363          | 0.14285714 | 0.00126712 | 0.06159828 |
| GO:0006096   | glycolytic process                                                                         | biological_process | metabolic process                | 4                       | 252                      | 49            | 24363          | 0.08163265 | 0.00164351 | 0.06590067 |
| GO:0006166   | purine ribonucleoside salvage                                                              | biological_process | metabolic process                | 2                       | 252                      | 6             | 24363          | 0.33333333 | 0.00155529 | 0.06590067 |
| GO:0006533   | aspartate catabolic process                                                                | biological_process | metabolic process                | 2                       | 252                      | 6             | 24363          | 0.33333333 | 0.00155529 | 0.06590067 |
| GO:0006641   | triglyceride metabolic process                                                             | biological_process | metabolic process                | 4                       | 252                      | 49            | 24363          | 0.08163265 | 0.00164351 | 0.06590067 |
| GO:0015866   | ADP transport                                                                              | biological_process | localization                     | 2                       | 252                      | 6             | 24363          | 0.33333333 | 0.00155529 | 0.06590067 |

|            |                                                                                           |                    |                                  |   |     |     |       |            |            |            |
|------------|-------------------------------------------------------------------------------------------|--------------------|----------------------------------|---|-----|-----|-------|------------|------------|------------|
| GO:0042421 | norepinephrine biosynthetic process                                                       | biological_process | metabolic process                | 2 | 252 | 6   | 24363 | 0.33333333 | 0.00155529 | 0.06590067 |
| GO:0045926 | negative regulation of growth                                                             | biological_process | regulation of biological process | 3 | 252 | 23  | 24363 | 0.13043478 | 0.00166173 | 0.06590067 |
| GO:0008366 | axon ensheathment                                                                         | biological_process | developmental process            | 2 | 252 | 7   | 24363 | 0.28571429 | 0.00216256 | 0.0775946  |
| GO:0033292 | T-tubule organization                                                                     | biological_process | developmental process            | 2 | 252 | 7   | 24363 | 0.28571429 | 0.00216256 | 0.0775946  |
| GO:0042776 | mitochondrial ATP synthesis coupled proton transport                                      | biological_process | metabolic process                | 3 | 252 | 25  | 24363 | 0.12       | 0.00212546 | 0.0775946  |
| GO:1904778 | positive regulation of protein localization to cell cortex                                | biological_process | regulation of biological process | 2 | 252 | 7   | 24363 | 0.28571429 | 0.00216256 | 0.0775946  |
| GO:0002504 | antigen processing and presentation of peptide or polysaccharide antigen via MHC class II | biological_process | immune system process            | 3 | 252 | 26  | 24363 | 0.11538462 | 0.00238447 | 0.07985335 |
| GO:0006536 | glutamate metabolic process                                                               | biological_process | metabolic process                | 3 | 252 | 26  | 24363 | 0.11538462 | 0.00238447 | 0.07985335 |
| GO:0071294 | cellular response to zinc ion                                                             | biological_process | response to stimulus             | 3 | 252 | 26  | 24363 | 0.11538462 | 0.00238447 | 0.07985335 |
| GO:0050796 | regulation of insulin secretion                                                           | biological_process | regulation of biological process | 5 | 252 | 90  | 24363 | 0.05555556 | 0.00244792 | 0.08019592 |
| GO:0006749 | glutathione metabolic process                                                             | biological_process | metabolic process                | 4 | 252 | 55  | 24363 | 0.07272727 | 0.00252077 | 0.08082554 |
| GO:0007007 | inner mitochondrial membrane organization                                                 | biological_process | cellular process                 | 2 | 252 | 8   | 24363 | 0.25       | 0.00286376 | 0.08142816 |
| GO:0042423 | catecholamine biosynthetic process                                                        | biological_process | metabolic process                | 2 | 252 | 8   | 24363 | 0.25       | 0.00286376 | 0.08142816 |
| GO:0045428 | regulation of nitric oxide biosynthetic process                                           | biological_process | metabolic process                | 2 | 252 | 8   | 24363 | 0.25       | 0.00286376 | 0.08142816 |
| GO:0045542 | positive regulation of cholesterol biosynthetic process                                   | biological_process | metabolic process                | 2 | 252 | 8   | 24363 | 0.25       | 0.00286376 | 0.08142816 |
| GO:0046167 | glycerol-3-phosphate biosynthetic process                                                 | biological_process | metabolic process                | 2 | 252 | 8   | 24363 | 0.25       | 0.00286376 | 0.08142816 |
| GO:0061732 | mitochondrial acetyl-CoA biosynthetic process from pyruvate                               | biological_process | metabolic process                | 2 | 252 | 8   | 24363 | 0.25       | 0.00286376 | 0.08142816 |
| GO:0010811 | positive regulation of cell-substrate adhesion                                            | biological_process | biological adhesion              | 4 | 252 | 58  | 24363 | 0.06896552 | 0.0030611  | 0.08542723 |
| GO:0042755 | eating behavior                                                                           | biological_process | behavior                         | 3 | 252 | 29  | 24363 | 0.10344828 | 0.00327552 | 0.08974919 |
| GO:0009437 | carnitine metabolic process                                                               | biological_process | metabolic process                | 2 | 252 | 9   | 24363 | 0.22222222 | 0.00365692 | 0.09340636 |
| GO:0015696 | ammonium transport                                                                        | biological_process | localization                     | 2 | 252 | 9   | 24363 | 0.22222222 | 0.00365692 | 0.09340636 |
| GO:0035900 | response to isolation stress                                                              | biological_process | response to stimulus             | 2 | 252 | 9   | 24363 | 0.22222222 | 0.00365692 | 0.09340636 |
| GO:0060052 | neurofilament cytoskeleton organization                                                   | biological_process | cellular process                 | 2 | 252 | 9   | 24363 | 0.22222222 | 0.00365692 | 0.09340636 |
| GO:0006882 | cellular zinc ion homeostasis                                                             | biological_process | cellular process                 | 3 | 252 | 31  | 24363 | 0.09677419 | 0.00396867 | 0.09646421 |
| GO:0007160 | cell-matrix adhesion                                                                      | biological_process | biological adhesion              | 6 | 252 | 144 | 24363 | 0.04166667 | 0.00392615 | 0.09646421 |
| GO:0048169 | regulation of long-term neuronal synaptic plasticity                                      | biological_process | regulation of biological process | 3 | 252 | 31  | 24363 | 0.09677419 | 0.00396867 | 0.09646421 |
| GO:0006012 | galactose metabolic process                                                               | biological_process | metabolic process                | 2 | 252 | 10  | 24363 | 0.2        | 0.00454006 | 0.09915745 |
| GO:0006650 | glycerophospholipid metabolic process                                                     | biological_process | metabolic process                | 2 | 252 | 10  | 24363 | 0.2        | 0.00454006 | 0.09915745 |
| GO:0006972 | hyperosmotic response                                                                     | biological_process | response to stimulus             | 2 | 252 | 10  | 24363 | 0.2        | 0.00454006 | 0.09915745 |
| GO:0048261 | negative regulation of receptor-mediated endocytosis                                      | biological_process | regulation of biological process | 2 | 252 | 10  | 24363 | 0.2        | 0.00454006 | 0.09915745 |
| GO:0051259 | protein complex oligomerization                                                           | biological_process | cellular process                 | 5 | 252 | 102 | 24363 | 0.04901961 | 0.00419898 | 0.09915745 |
| GO:0051924 | regulation of calcium ion transport                                                       | biological_process | regulation of biological process | 3 | 252 | 32  | 24363 | 0.09375    | 0.00434611 | 0.09915745 |

|            |                                                                    |                    |                                  |    |     |     |       |            |            |            |
|------------|--------------------------------------------------------------------|--------------------|----------------------------------|----|-----|-----|-------|------------|------------|------------|
| GO:0072488 | ammonium transmembrane transport                                   | biological_process | localization                     | 2  | 252 | 10  | 24363 | 0.2        | 0.00454006 | 0.09915745 |
| GO:0045471 | response to ethanol                                                | biological_process | response to stimulus             | 6  | 252 | 151 | 24363 | 0.0397351  | 0.00494323 | 0.10642074 |
| GO:0001523 | retinoid metabolic process                                         | biological_process | metabolic process                | 4  | 252 | 69  | 24363 | 0.05797101 | 0.0057107  | 0.11055128 |
| GO:0002280 | monocyte activation involved in immune response                    | biological_process | immune system process            | 1  | 252 | 1   | 24363 | 1          | 0.01034355 | 0.11055128 |
| GO:0002443 | leukocyte mediated immunity                                        | biological_process | immune system process            | 1  | 252 | 1   | 24363 | 1          | 0.01034355 | 0.11055128 |
| GO:0002506 | polysaccharide assembly with MHC class II protein complex          | biological_process | immune system process            | 2  | 252 | 13  | 24363 | 0.15384615 | 0.00771022 | 0.11055128 |
| GO:0006006 | glucose metabolic process                                          | biological_process | metabolic process                | 4  | 252 | 77  | 24363 | 0.05194805 | 0.00838576 | 0.11055128 |
| GO:0006083 | acetate metabolic process                                          | biological_process | metabolic process                | 1  | 252 | 1   | 24363 | 1          | 0.01034355 | 0.11055128 |
| GO:0006446 | regulation of translational initiation                             | biological_process | metabolic process                | 3  | 252 | 41  | 24363 | 0.07317073 | 0.00872554 | 0.11055128 |
| GO:0006584 | catecholamine metabolic process                                    | biological_process | metabolic process                | 2  | 252 | 11  | 24363 | 0.18181818 | 0.00551125 | 0.11055128 |
| GO:0006585 | dopamine biosynthetic process from tyrosine                        | biological_process | metabolic process                | 1  | 252 | 1   | 24363 | 1          | 0.01034355 | 0.11055128 |
| GO:0006631 | fatty acid metabolic process                                       | biological_process | metabolic process                | 6  | 252 | 170 | 24363 | 0.03529412 | 0.00866875 | 0.11055128 |
| GO:0006811 | ion transport                                                      | biological_process | localization                     | 15 | 252 | 690 | 24363 | 0.02173913 | 0.00572719 | 0.11055128 |
| GO:0006816 | calcium ion transport                                              | biological_process | localization                     | 6  | 252 | 165 | 24363 | 0.03636364 | 0.00753922 | 0.11055128 |
| GO:0006851 | mitochondrial calcium ion transmembrane transport                  | biological_process | localization                     | 3  | 252 | 37  | 24363 | 0.08108108 | 0.00655522 | 0.11055128 |
| GO:0006995 | cellular response to nitrogen starvation                           | biological_process | response to stimulus             | 2  | 252 | 14  | 24363 | 0.14285714 | 0.00893428 | 0.11055128 |
| GO:0007626 | locomotory behavior                                                | biological_process | behavior                         | 5  | 252 | 117 | 24363 | 0.04273504 | 0.00746019 | 0.11055128 |
| GO:0008218 | bioluminescence                                                    | biological_process | metabolic process                | 1  | 252 | 1   | 24363 | 1          | 0.01034355 | 0.11055128 |
| GO:0008334 | histone mRNA metabolic process                                     | biological_process | metabolic process                | 2  | 252 | 14  | 24363 | 0.14285714 | 0.00893428 | 0.11055128 |
| GO:0010243 | response to organonitrogen compound                                | biological_process | response to stimulus             | 3  | 252 | 37  | 24363 | 0.08108108 | 0.00655522 | 0.11055128 |
| GO:0010987 | negative regulation of high-density lipoprotein particle clearance | biological_process | regulation of biological process | 1  | 252 | 1   | 24363 | 1          | 0.01034355 | 0.11055128 |
| GO:0015867 | ATP transport                                                      | biological_process | response to stimulus             | 2  | 252 | 12  | 24363 | 0.16666667 | 0.00656859 | 0.11055128 |
| GO:0015868 | purine ribonucleotide transport                                    | biological_process | localization                     | 1  | 252 | 1   | 24363 | 1          | 0.01034355 | 0.11055128 |
| GO:0015961 | diadenosine polyphosphate catabolic process                        | biological_process | metabolic process                | 1  | 252 | 1   | 24363 | 1          | 0.01034355 | 0.11055128 |
| GO:0016137 | glycoside metabolic process                                        | biological_process | metabolic process                | 1  | 252 | 1   | 24363 | 1          | 0.01034355 | 0.11055128 |
| GO:0019370 | leukotriene biosynthetic process                                   | biological_process | metabolic process                | 2  | 252 | 15  | 24363 | 0.13333333 | 0.01023896 | 0.11055128 |
| GO:0021686 | cerebellar granular layer maturation                               | biological_process | developmental process            | 1  | 252 | 1   | 24363 | 1          | 0.01034355 | 0.11055128 |
| GO:0021702 | cerebellar Purkinje cell differentiation                           | biological_process | developmental process            | 2  | 252 | 14  | 24363 | 0.14285714 | 0.00893428 | 0.11055128 |
| GO:0030421 | defecation                                                         | biological_process | multicellular organismal process | 1  | 252 | 1   | 24363 | 1          | 0.01034355 | 0.11055128 |
| GO:0032272 | negative regulation of protein polymerization                      | biological_process | regulation of biological process | 1  | 252 | 1   | 24363 | 1          | 0.01034355 | 0.11055128 |
| GO:0032981 | mitochondrial respiratory chain complex I assembly                 | biological_process | cellular process                 | 4  | 252 | 81  | 24363 | 0.04938272 | 0.00998593 | 0.11055128 |
| GO:0032990 | cell part morphogenesis                                            | biological_process | developmental process            | 1  | 252 | 1   | 24363 | 1          | 0.01034355 | 0.11055128 |
| GO:0034551 | mitochondrial respiratory chain complex III assembly               | biological_process | cellular process                 | 2  | 252 | 12  | 24363 | 0.16666667 | 0.00656859 | 0.11055128 |
| GO:0035971 | peptidyl-histidine dephosphorylation                               | biological_process | metabolic process                | 1  | 252 | 1   | 24363 | 1          | 0.01034355 | 0.11055128 |
| GO:0042088 | T-helper 1 type immune response                                    | biological_process | immune system process            | 2  | 252 | 14  | 24363 | 0.14285714 | 0.00893428 | 0.11055128 |

|            |                                                            |                    |                                  |    |     |     |       |            |            |            |
|------------|------------------------------------------------------------|--------------------|----------------------------------|----|-----|-----|-------|------------|------------|------------|
| GO:0042135 | neurotransmitter catabolic process                         | biological_process | metabolic process                | 2  | 252 | 14  | 24363 | 0.14285714 | 0.00893428 | 0.11055128 |
| GO:0042214 | terpene metabolic process                                  | biological_process | metabolic process                | 1  | 252 | 1   | 24363 | 1          | 0.01034355 | 0.11055128 |
| GO:0042420 | dopamine catabolic process                                 | biological_process | metabolic process                | 2  | 252 | 11  | 24363 | 0.18181818 | 0.00551125 | 0.11055128 |
| GO:0042493 | response to drug                                           | biological_process | response to stimulus             | 10 | 252 | 394 | 24363 | 0.02538071 | 0.00825444 | 0.11055128 |
| GO:0042543 | protein N-linked glycosylation via arginine                | biological_process | metabolic process                | 1  | 252 | 1   | 24363 | 1          | 0.01034355 | 0.11055128 |
| GO:0046177 | D-gluconate catabolic process                              | biological_process | metabolic process                | 1  | 252 | 1   | 24363 | 1          | 0.01034355 | 0.11055128 |
| GO:0050663 | cytokine secretion                                         | biological_process | localization                     | 2  | 252 | 12  | 24363 | 0.16666667 | 0.00656859 | 0.11055128 |
| GO:0050703 | interleukin-1 alpha secretion                              | biological_process | localization                     | 1  | 252 | 1   | 24363 | 1          | 0.01034355 | 0.11055128 |
| GO:0050758 | regulation of thymidylate synthase biosynthetic process    | biological_process | metabolic process                | 1  | 252 | 1   | 24363 | 1          | 0.01034355 | 0.11055128 |
| GO:0050900 | leukocyte migration                                        | biological_process | immune system process            | 7  | 252 | 211 | 24363 | 0.03317536 | 0.00656039 | 0.11055128 |
| GO:0051350 | negative regulation of lyase activity                      | biological_process | biological regulation            | 1  | 252 | 1   | 24363 | 1          | 0.01034355 | 0.11055128 |
| GO:0051602 | response to electrical stimulus                            | biological_process | response to stimulus             | 3  | 252 | 39  | 24363 | 0.07692308 | 0.00759444 | 0.11055128 |
| GO:0060409 | positive regulation of acetylcholine metabolic process     | biological_process | metabolic process                | 1  | 252 | 1   | 24363 | 1          | 0.01034355 | 0.11055128 |
| GO:0061163 | endoplasmic reticulum polarization                         | biological_process | cellular process                 | 1  | 252 | 1   | 24363 | 1          | 0.01034355 | 0.11055128 |
| GO:0061573 | actin filament bundle retrograde transport                 | biological_process | cellular process                 | 1  | 252 | 1   | 24363 | 1          | 0.01034355 | 0.11055128 |
| GO:0061621 | canonical glycolysis                                       | biological_process | metabolic process                | 3  | 252 | 41  | 24363 | 0.07317073 | 0.00872554 | 0.11055128 |
| GO:0071045 | nuclear histone mRNA catabolic process                     | biological_process | metabolic process                | 1  | 252 | 1   | 24363 | 1          | 0.01034355 | 0.11055128 |
| GO:0071384 | cellular response to corticosteroid stimulus               | biological_process | response to stimulus             | 1  | 252 | 1   | 24363 | 1          | 0.01034355 | 0.11055128 |
| GO:0071470 | cellular response to osmotic stress                        | biological_process | response to stimulus             | 2  | 252 | 14  | 24363 | 0.14285714 | 0.00893428 | 0.11055128 |
| GO:0071544 | diphosphoinositol polyphosphate catabolic process          | biological_process | metabolic process                | 1  | 252 | 1   | 24363 | 1          | 0.01034355 | 0.11055128 |
| GO:0085018 | maintenance of symbiont-containing vacuole by host         | biological_process | multi-organism process           | 1  | 252 | 1   | 24363 | 1          | 0.01034355 | 0.11055128 |
| GO:0097017 | renal protein absorption                                   | biological_process | multicellular organismal process | 1  | 252 | 1   | 24363 | 1          | 0.01034355 | 0.11055128 |
| GO:0098743 | cell aggregation                                           | biological_process | cell aggregation                 | 1  | 252 | 1   | 24363 | 1          | 0.01034355 | 0.11055128 |
| GO:0098746 | fast, calcium ion-dependent exocytosis of neurotransmitter | biological_process | signaling                        | 1  | 252 | 1   | 24363 | 1          | 0.01034355 | 0.11055128 |
| GO:0099148 | regulation of synaptic vesicle docking                     | biological_process | regulation of biological process | 1  | 252 | 1   | 24363 | 1          | 0.01034355 | 0.11055128 |
| GO:1900053 | negative regulation of retinoic acid biosynthetic process  | biological_process | metabolic process                | 1  | 252 | 1   | 24363 | 1          | 0.01034355 | 0.11055128 |
| GO:1901624 | negative regulation of lymphocyte chemotaxis               | biological_process | regulation of biological process | 1  | 252 | 1   | 24363 | 1          | 0.01034355 | 0.11055128 |
| GO:1901698 | response to nitrogen compound                              | biological_process | response to stimulus             | 1  | 252 | 1   | 24363 | 1          | 0.01034355 | 0.11055128 |
| GO:1902915 | negative regulation of protein polyubiquitination          | biological_process | metabolic process                | 1  | 252 | 1   | 24363 | 1          | 0.01034355 | 0.11055128 |
| GO:1903720 | negative regulation of I-kappaB phosphorylation            | biological_process | metabolic process                | 1  | 252 | 1   | 24363 | 1          | 0.01034355 | 0.11055128 |
| GO:1903801 | L-leucine import across plasma membrane                    | biological_process | localization                     | 1  | 252 | 1   | 24363 | 1          | 0.01034355 | 0.11055128 |
| GO:1903903 | regulation of establishment of T cell polarity             | biological_process | regulation of biological process | 1  | 252 | 1   | 24363 | 1          | 0.01034355 | 0.11055128 |

|            |                                                                                   |                    |                                  |   |     |     |       |            |            |            |
|------------|-----------------------------------------------------------------------------------|--------------------|----------------------------------|---|-----|-----|-------|------------|------------|------------|
| GO:1903906 | regulation of plasma membrane raft polarization                                   | biological_process | regulation of biological process | 1 | 252 | 1   | 24363 | 1          | 0.01034355 | 0.11055128 |
| GO:1903909 | regulation of receptor clustering                                                 | biological_process | regulation of biological process | 1 | 252 | 1   | 24363 | 1          | 0.01034355 | 0.11055128 |
| GO:1904240 | negative regulation of VCP-NPL4-UFD1 AAA ATPase complex assembly                  | biological_process | regulation of biological process | 1 | 252 | 1   | 24363 | 1          | 0.01034355 | 0.11055128 |
| GO:1904880 | response to hydrogen sulfide                                                      | biological_process | response to stimulus             | 1 | 252 | 1   | 24363 | 1          | 0.01034355 | 0.11055128 |
| GO:1990443 | peptidyl-threonine autophosphorylation                                            | biological_process | metabolic process                | 1 | 252 | 1   | 24363 | 1          | 0.01034355 | 0.11055128 |
| GO:2000224 | regulation of testosterone biosynthetic process                                   | biological_process | metabolic process                | 1 | 252 | 1   | 24363 | 1          | 0.01034355 | 0.11055128 |
| GO:0006626 | protein targeting to mitochondrion                                                | biological_process | localization                     | 3 | 252 | 45  | 24363 | 0.06666667 | 0.01126974 | 0.11876572 |
| GO:0007269 | neurotransmitter secretion                                                        | biological_process | signaling                        | 3 | 252 | 45  | 24363 | 0.06666667 | 0.01126974 | 0.11876572 |
| GO:0019953 | sexual reproduction                                                               | biological_process | reproduction                     | 2 | 252 | 16  | 24363 | 0.125      | 0.01162248 | 0.12079364 |
| GO:0098742 | cell-cell adhesion via plasma-membrane adhesion molecules                         | biological_process | biological adhesion              | 2 | 252 | 16  | 24363 | 0.125      | 0.01162248 | 0.12079364 |
| GO:0009060 | aerobic respiration                                                               | biological_process | metabolic process                | 3 | 252 | 46  | 24363 | 0.06521739 | 0.01196553 | 0.12102049 |
| GO:0019886 | antigen processing and presentation of exogenous peptide antigen via MHC class II | biological_process | immune system process            | 6 | 252 | 182 | 24363 | 0.03296703 | 0.0118664  | 0.12102049 |
| GO:0051592 | response to calcium ion                                                           | biological_process | response to stimulus             | 4 | 252 | 85  | 24363 | 0.04705882 | 0.01177197 | 0.12102049 |
| GO:0090501 | RNA phosphodiester bond hydrolysis                                                | biological_process | metabolic process                | 3 | 252 | 46  | 24363 | 0.06521739 | 0.01196553 | 0.12102049 |
| GO:0050790 | regulation of catalytic activity                                                  | biological_process | biological regulation            | 4 | 252 | 86  | 24363 | 0.04651163 | 0.01224839 | 0.12305549 |
| GO:0007568 | aging                                                                             | biological_process | developmental process            | 7 | 252 | 240 | 24363 | 0.02916667 | 0.01275501 | 0.12645921 |
| GO:1903779 | regulation of cardiac conduction                                                  | biological_process | regulation of biological process | 3 | 252 | 47  | 24363 | 0.06382979 | 0.01268549 | 0.12645921 |
| GO:0006122 | mitochondrial electron transport, ubiquinol to cytochrome c                       | biological_process | metabolic process                | 2 | 252 | 17  | 24363 | 0.11764706 | 0.01308309 | 0.1272014  |
| GO:0036444 | calcium import into the mitochondrion                                             | biological_process | localization                     | 2 | 252 | 17  | 24363 | 0.11764706 | 0.01308309 | 0.1272014  |
| GO:0071305 | cellular response to vitamin D                                                    | biological_process | response to stimulus             | 2 | 252 | 17  | 24363 | 0.11764706 | 0.01308309 | 0.1272014  |
| GO:0000165 | MAPK cascade                                                                      | biological_process | metabolic process                | 8 | 252 | 320 | 24363 | 0.025      | 0.01873911 | 0.13484728 |
| GO:0003011 | involuntary skeletal muscle contraction                                           | biological_process | multicellular organismal process | 1 | 252 | 2   | 24363 | 0.5        | 0.02058054 | 0.13484728 |
| GO:0003097 | renal water transport                                                             | biological_process | localization                     | 1 | 252 | 2   | 24363 | 0.5        | 0.02058054 | 0.13484728 |
| GO:0006051 | N-acetylmannosamine metabolic process                                             | biological_process | metabolic process                | 1 | 252 | 2   | 24363 | 0.5        | 0.02058054 | 0.13484728 |
| GO:0006119 | oxidative phosphorylation                                                         | biological_process | metabolic process                | 2 | 252 | 19  | 24363 | 0.10526316 | 0.01622865 | 0.13484728 |
| GO:0006123 | mitochondrial electron transport, cytochrome c to oxygen                          | biological_process | metabolic process                | 2 | 252 | 18  | 24363 | 0.11111111 | 0.01461905 | 0.13484728 |
| GO:0006175 | dATP biosynthetic process                                                         | biological_process | metabolic process                | 1 | 252 | 2   | 24363 | 0.5        | 0.02058054 | 0.13484728 |
| GO:0006178 | guanine salvage                                                                   | biological_process | metabolic process                | 1 | 252 | 2   | 24363 | 0.5        | 0.02058054 | 0.13484728 |
| GO:0006433 | prolyl-tRNA aminoacylation                                                        | biological_process | metabolic process                | 1 | 252 | 2   | 24363 | 0.5        | 0.02058054 | 0.13484728 |
| GO:0006678 | glucosylceramide metabolic process                                                | biological_process | metabolic process                | 1 | 252 | 2   | 24363 | 0.5        | 0.02058054 | 0.13484728 |
| GO:0006681 | galactosylceramide metabolic process                                              | biological_process | metabolic process                | 1 | 252 | 2   | 24363 | 0.5        | 0.02058054 | 0.13484728 |
| GO:0006750 | glutathione biosynthetic process                                                  | biological_process | metabolic process                | 2 | 252 | 19  | 24363 | 0.10526316 | 0.01622865 | 0.13484728 |
| GO:0006869 | lipid transport                                                                   | biological_process | localization                     | 5 | 252 | 149 | 24363 | 0.03355705 | 0.01956986 | 0.13484728 |
| GO:0006878 | cellular copper ion homeostasis                                                   | biological_process | cellular process                 | 2 | 252 | 19  | 24363 | 0.10526316 | 0.01622865 | 0.13484728 |
| GO:0006883 | cellular sodium ion homeostasis                                                   | biological_process | cellular process                 | 2 | 252 | 21  | 24363 | 0.0952381  | 0.01966214 | 0.13484728 |

|            |                                                                        |                    |                                  |    |     |     |       |            |            |            |
|------------|------------------------------------------------------------------------|--------------------|----------------------------------|----|-----|-----|-------|------------|------------|------------|
| GO:0008617 | guanosine metabolic process                                            | biological_process | metabolic process                | 1  | 252 | 2   | 24363 | 0.5        | 0.02058054 | 0.13484728 |
| GO:0009438 | methylglyoxal metabolic process                                        | biological_process | metabolic process                | 1  | 252 | 2   | 24363 | 0.5        | 0.02058054 | 0.13484728 |
| GO:0010848 | regulation of chromatin disassembly                                    | biological_process | regulation of biological process | 1  | 252 | 2   | 24363 | 0.5        | 0.02058054 | 0.13484728 |
| GO:0014823 | response to activity                                                   | biological_process | response to stimulus             | 3  | 252 | 55  | 24363 | 0.05454545 | 0.01932756 | 0.13484728 |
| GO:0014891 | striated muscle atrophy                                                | biological_process | response to stimulus             | 1  | 252 | 2   | 24363 | 0.5        | 0.02058054 | 0.13484728 |
| GO:0016310 | phosphorylation                                                        | biological_process | metabolic process                | 14 | 252 | 718 | 24363 | 0.01949861 | 0.01788315 | 0.13484728 |
| GO:0016488 | farnesol catabolic process                                             | biological_process | metabolic process                | 1  | 252 | 2   | 24363 | 0.5        | 0.02058054 | 0.13484728 |
| GO:0019242 | methylglyoxal biosynthetic process                                     | biological_process | metabolic process                | 1  | 252 | 2   | 24363 | 0.5        | 0.02058054 | 0.13484728 |
| GO:0021933 | radial glia guided migration of cerebellar granule cell                | biological_process | developmental process            | 1  | 252 | 2   | 24363 | 0.5        | 0.02058054 | 0.13484728 |
| GO:0021941 | negative regulation of cerebellar granule cell precursor proliferation | biological_process | developmental process            | 1  | 252 | 2   | 24363 | 0.5        | 0.02058054 | 0.13484728 |
| GO:0030890 | positive regulation of B cell proliferation                            | biological_process | regulation of biological process | 3  | 252 | 55  | 24363 | 0.05454545 | 0.01932756 | 0.13484728 |
| GO:0032781 | positive regulation of ATPase activity                                 | biological_process | biological regulation            | 3  | 252 | 51  | 24363 | 0.05882353 | 0.01580935 | 0.13484728 |
| GO:0035377 | transepithelial water transport                                        | biological_process | localization                     | 1  | 252 | 2   | 24363 | 0.5        | 0.02058054 | 0.13484728 |
| GO:0035378 | carbon dioxide transmembrane transport                                 | biological_process | response to stimulus             | 1  | 252 | 2   | 24363 | 0.5        | 0.02058054 | 0.13484728 |
| GO:0035743 | CD4-positive, alpha-beta T cell cytokine production                    | biological_process | immune system process            | 1  | 252 | 2   | 24363 | 0.5        | 0.02058054 | 0.13484728 |
| GO:0036413 | histone H3-R26 citrullination                                          | biological_process | metabolic process                | 1  | 252 | 2   | 24363 | 0.5        | 0.02058054 | 0.13484728 |
| GO:0042309 | homiothermy                                                            | biological_process | multicellular organismal process | 1  | 252 | 2   | 24363 | 0.5        | 0.02058054 | 0.13484728 |
| GO:0042361 | menaquinone catabolic process                                          | biological_process | metabolic process                | 1  | 252 | 2   | 24363 | 0.5        | 0.02058054 | 0.13484728 |
| GO:0042377 | vitamin K catabolic process                                            | biological_process | metabolic process                | 1  | 252 | 2   | 24363 | 0.5        | 0.02058054 | 0.13484728 |
| GO:0042593 | glucose homeostasis                                                    | biological_process | biological regulation            | 5  | 252 | 149 | 24363 | 0.03355705 | 0.01956986 | 0.13484728 |
| GO:0042745 | circadian sleep/wake cycle                                             | biological_process | behavior                         | 1  | 252 | 2   | 24363 | 0.5        | 0.02058054 | 0.13484728 |
| GO:0042773 | ATP synthesis coupled electron transport                               | biological_process | metabolic process                | 1  | 252 | 2   | 24363 | 0.5        | 0.02058054 | 0.13484728 |
| GO:0043101 | purine-containing compound salvage                                     | biological_process | metabolic process                | 2  | 252 | 18  | 24363 | 0.11111111 | 0.01461905 | 0.13484728 |
| GO:0043128 | positive regulation of 1-phosphatidylinositol 4-kinase activity        | biological_process | metabolic process                | 1  | 252 | 2   | 24363 | 0.5        | 0.02058054 | 0.13484728 |
| GO:0043602 | nitrate catabolic process                                              | biological_process | metabolic process                | 1  | 252 | 2   | 24363 | 0.5        | 0.02058054 | 0.13484728 |
| GO:0045795 | positive regulation of cell volume                                     | biological_process | cellular process                 | 1  | 252 | 2   | 24363 | 0.5        | 0.02058054 | 0.13484728 |
| GO:0046038 | GMP catabolic process                                                  | biological_process | metabolic process                | 1  | 252 | 2   | 24363 | 0.5        | 0.02058054 | 0.13484728 |
| GO:0046070 | dGTP metabolic process                                                 | biological_process | metabolic process                | 1  | 252 | 2   | 24363 | 0.5        | 0.02058054 | 0.13484728 |
| GO:0046122 | purine deoxyribonucleoside metabolic process                           | biological_process | metabolic process                | 1  | 252 | 2   | 24363 | 0.5        | 0.02058054 | 0.13484728 |
| GO:0046210 | nitric oxide catabolic process                                         | biological_process | metabolic process                | 1  | 252 | 2   | 24363 | 0.5        | 0.02058054 | 0.13484728 |
| GO:0046449 | creatinine metabolic process                                           | biological_process | metabolic process                | 1  | 252 | 2   | 24363 | 0.5        | 0.02058054 | 0.13484728 |
| GO:0046459 | short-chain fatty acid metabolic process                               | biological_process | metabolic process                | 1  | 252 | 2   | 24363 | 0.5        | 0.02058054 | 0.13484728 |
| GO:0046473 | phosphatidic acid metabolic process                                    | biological_process | metabolic process                | 1  | 252 | 2   | 24363 | 0.5        | 0.02058054 | 0.13484728 |
| GO:0048936 | peripheral nervous system neuron axonogenesis                          | biological_process | developmental process            | 1  | 252 | 2   | 24363 | 0.5        | 0.02058054 | 0.13484728 |
| GO:0050765 | negative regulation of phagocytosis                                    | biological_process | regulation of biological process | 2  | 252 | 19  | 24363 | 0.10526316 | 0.01622865 | 0.13484728 |

|            |                                                                          |                    |                                  |   |     |    |       |            |            |            |
|------------|--------------------------------------------------------------------------|--------------------|----------------------------------|---|-----|----|-------|------------|------------|------------|
| GO:0051083 | 'de novo' cotranslational protein folding                                | biological_process | cellular process                 | 1 | 252 | 2  | 24363 | 0.5        | 0.02058054 | 0.13484728 |
| GO:0051560 | mitochondrial calcium ion homeostasis                                    | biological_process | cellular process                 | 2 | 252 | 20 | 24363 | 0.1        | 0.01791023 | 0.13484728 |
| GO:0051561 | positive regulation of mitochondrial calcium ion concentration           | biological_process | cellular process                 | 2 | 252 | 18 | 24363 | 0.11111111 | 0.01461905 | 0.13484728 |
| GO:0052314 | phytoalexin metabolic process                                            | biological_process | metabolic process                | 1 | 252 | 2  | 24363 | 0.5        | 0.02058054 | 0.13484728 |
| GO:0060327 | cytoplasmic actin-based contraction involved in cell motility            | biological_process | locomotion                       | 1 | 252 | 2  | 24363 | 0.5        | 0.02058054 | 0.13484728 |
| GO:0060370 | susceptibility to T cell mediated cytotoxicity                           | biological_process | regulation of biological process | 1 | 252 | 2  | 24363 | 0.5        | 0.02058054 | 0.13484728 |
| GO:0060681 | branch elongation involved in ureteric bud branching                     | biological_process | developmental process            | 1 | 252 | 2  | 24363 | 0.5        | 0.02058054 | 0.13484728 |
| GO:0071231 | cellular response to folic acid                                          | biological_process | response to stimulus             | 1 | 252 | 2  | 24363 | 0.5        | 0.02058054 | 0.13484728 |
| GO:0071288 | cellular response to mercury ion                                         | biological_process | response to stimulus             | 1 | 252 | 2  | 24363 | 0.5        | 0.02058054 | 0.13484728 |
| GO:0071349 | cellular response to interleukin-12                                      | biological_process | response to stimulus             | 1 | 252 | 2  | 24363 | 0.5        | 0.02058054 | 0.13484728 |
| GO:0072163 | mesonephric epithelium development                                       | biological_process | developmental process            | 1 | 252 | 2  | 24363 | 0.5        | 0.02058054 | 0.13484728 |
| GO:0090031 | positive regulation of steroid hormone biosynthetic process              | biological_process | metabolic process                | 1 | 252 | 2  | 24363 | 0.5        | 0.02058054 | 0.13484728 |
| GO:0090346 | cellular organofluorine metabolic process                                | biological_process | metabolic process                | 1 | 252 | 2  | 24363 | 0.5        | 0.02058054 | 0.13484728 |
| GO:0097178 | ruffle assembly                                                          | biological_process | cellular process                 | 2 | 252 | 19 | 24363 | 0.10526316 | 0.01622865 | 0.13484728 |
| GO:1901379 | regulation of potassium ion transmembrane transport                      | biological_process | regulation of biological process | 2 | 252 | 20 | 24363 | 0.1        | 0.01791023 | 0.13484728 |
| GO:1903305 | regulation of regulated secretory pathway                                | biological_process | regulation of biological process | 1 | 252 | 2  | 24363 | 0.5        | 0.02058054 | 0.13484728 |
| GO:1903946 | negative regulation of ventricular cardiac muscle cell action potential  | biological_process | regulation of biological process | 1 | 252 | 2  | 24363 | 0.5        | 0.02058054 | 0.13484728 |
| GO:1904024 | negative regulation of glucose catabolic process to lactate via pyruvate | biological_process | metabolic process                | 1 | 252 | 2  | 24363 | 0.5        | 0.02058054 | 0.13484728 |
| GO:1904389 | rod bipolar cell differentiation                                         | biological_process | developmental process            | 1 | 252 | 2  | 24363 | 0.5        | 0.02058054 | 0.13484728 |
| GO:1904391 | response to ciliary neurotrophic factor                                  | biological_process | response to stimulus             | 1 | 252 | 2  | 24363 | 0.5        | 0.02058054 | 0.13484728 |
| GO:1904397 | negative regulation of neuromuscular junction development                | biological_process | regulation of biological process | 1 | 252 | 2  | 24363 | 0.5        | 0.02058054 | 0.13484728 |
| GO:1905709 | negative regulation of membrane permeability                             | biological_process | biological regulation            | 1 | 252 | 2  | 24363 | 0.5        | 0.02058054 | 0.13484728 |
| GO:2000474 | regulation of opioid receptor signaling pathway                          | biological_process | regulation of biological process | 1 | 252 | 2  | 24363 | 0.5        | 0.02058054 | 0.13484728 |
| GO:2000516 | positive regulation of CD4-positive, alpha-beta T cell activation        | biological_process | biological adhesion              | 1 | 252 | 2  | 24363 | 0.5        | 0.02058054 | 0.13484728 |
| GO:2000984 | negative regulation of ATP citrate synthase activity                     | biological_process | biological regulation            | 1 | 252 | 2  | 24363 | 0.5        | 0.02058054 | 0.13484728 |
| GO:0006520 | cellular amino acid metabolic process                                    | biological_process | metabolic process                | 3 | 252 | 57 | 24363 | 0.05263158 | 0.0212356  | 0.13853701 |

|            |                                                                           |                    |                                  |    |     |     |       |            |            |            |
|------------|---------------------------------------------------------------------------|--------------------|----------------------------------|----|-----|-----|-------|------------|------------|------------|
| GO:0015986 | ATP synthesis coupled proton transport                                    | biological_process | metabolic process                | 2  | 252 | 22  | 24363 | 0.09090909 | 0.02148275 | 0.13894637 |
| GO:0048168 | regulation of neuronal synaptic plasticity                                | biological_process | regulation of biological process | 2  | 252 | 22  | 24363 | 0.09090909 | 0.02148275 | 0.13894637 |
| GO:0016032 | viral process                                                             | biological_process | multi-organism process           | 13 | 252 | 665 | 24363 | 0.01954887 | 0.02164354 | 0.1393881  |
| GO:0008652 | cellular amino acid biosynthetic process                                  | biological_process | metabolic process                | 3  | 252 | 58  | 24363 | 0.05172414 | 0.02222694 | 0.1419322  |
| GO:0034332 | adherens junction organization                                            | biological_process | cellular process                 | 3  | 252 | 58  | 24363 | 0.05172414 | 0.02222694 | 0.1419322  |
| GO:0002503 | peptide antigen assembly with MHC class II protein complex                | biological_process | immune system process            | 2  | 252 | 23  | 24363 | 0.08695652 | 0.02337047 | 0.14674708 |
| GO:0006103 | 2-oxoglutarate metabolic process                                          | biological_process | metabolic process                | 2  | 252 | 23  | 24363 | 0.08695652 | 0.02337047 | 0.14674708 |
| GO:0051412 | response to corticosterone                                                | biological_process | response to stimulus             | 2  | 252 | 23  | 24363 | 0.08695652 | 0.02337047 | 0.14674708 |
| GO:1903861 | positive regulation of dendrite extension                                 | biological_process | developmental process            | 2  | 252 | 23  | 24363 | 0.08695652 | 0.02337047 | 0.14674708 |
| GO:0001676 | long-chain fatty acid metabolic process                                   | biological_process | metabolic process                | 2  | 252 | 26  | 24363 | 0.07692308 | 0.02942067 | 0.15026967 |
| GO:0001678 | cellular glucose homeostasis                                              | biological_process | cellular process                 | 2  | 252 | 26  | 24363 | 0.07692308 | 0.02942067 | 0.15026967 |
| GO:0002891 | positive regulation of immunoglobulin mediated immune response            | biological_process | regulation of biological process | 1  | 252 | 3   | 24363 | 0.33333333 | 0.03071205 | 0.15026967 |
| GO:0003420 | regulation of growth plate cartilage chondrocyte proliferation            | biological_process | developmental process            | 1  | 252 | 3   | 24363 | 0.33333333 | 0.03071205 | 0.15026967 |
| GO:0006408 | snRNA export from nucleus                                                 | biological_process | localization                     | 1  | 252 | 3   | 24363 | 0.33333333 | 0.03071205 | 0.15026967 |
| GO:0006576 | cellular biogenic amine metabolic process                                 | biological_process | metabolic process                | 1  | 252 | 3   | 24363 | 0.33333333 | 0.03071205 | 0.15026967 |
| GO:0006589 | octopamine biosynthetic process                                           | biological_process | metabolic process                | 1  | 252 | 3   | 24363 | 0.33333333 | 0.03071205 | 0.15026967 |
| GO:0007188 | adenylate cyclase-modulating G protein-coupled receptor signaling pathway | biological_process | regulation of biological process | 3  | 252 | 64  | 24363 | 0.046875   | 0.02869706 | 0.15026967 |
| GO:0007271 | synaptic transmission, cholinergic                                        | biological_process | signaling                        | 2  | 252 | 26  | 24363 | 0.07692308 | 0.02942067 | 0.15026967 |
| GO:0008053 | mitochondrial fusion                                                      | biological_process | cellular process                 | 2  | 252 | 24  | 24363 | 0.08333333 | 0.02532372 | 0.15026967 |
| GO:0009157 | deoxyribonucleoside monophosphate biosynthetic process                    | biological_process | metabolic process                | 1  | 252 | 3   | 24363 | 0.33333333 | 0.03071205 | 0.15026967 |
| GO:0009448 | gamma-aminobutyric acid metabolic process                                 | biological_process | metabolic process                | 1  | 252 | 3   | 24363 | 0.33333333 | 0.03071205 | 0.15026967 |
| GO:0009450 | gamma-aminobutyric acid catabolic process                                 | biological_process | metabolic process                | 1  | 252 | 3   | 24363 | 0.33333333 | 0.03071205 | 0.15026967 |
| GO:0009611 | response to wounding                                                      | biological_process | response to stimulus             | 4  | 252 | 112 | 24363 | 0.03571429 | 0.02916076 | 0.15026967 |
| GO:0015680 | protein maturation by copper ion transfer                                 | biological_process | metabolic process                | 1  | 252 | 3   | 24363 | 0.33333333 | 0.03071205 | 0.15026967 |
| GO:0016236 | macroautophagy                                                            | biological_process | metabolic process                | 4  | 252 | 108 | 24363 | 0.03703704 | 0.02596755 | 0.15026967 |
| GO:0021692 | cerebellar Purkinje cell layer morphogenesis                              | biological_process | developmental process            | 1  | 252 | 3   | 24363 | 0.33333333 | 0.03071205 | 0.15026967 |
| GO:0030031 | cell projection assembly                                                  | biological_process | cellular process                 | 2  | 252 | 24  | 24363 | 0.08333333 | 0.02532372 | 0.15026967 |
| GO:0030185 | nitric oxide transport                                                    | biological_process | response to stimulus             | 1  | 252 | 3   | 24363 | 0.33333333 | 0.03071205 | 0.15026967 |
| GO:0030382 | sperm mitochondrion organization                                          | biological_process | cellular process                 | 1  | 252 | 3   | 24363 | 0.33333333 | 0.03071205 | 0.15026967 |
| GO:0031947 | negative regulation of glucocorticoid biosynthetic process                | biological_process | metabolic process                | 1  | 252 | 3   | 24363 | 0.33333333 | 0.03071205 | 0.15026967 |
| GO:0032620 | interleukin-17 production                                                 | biological_process | multicellular organismal process | 1  | 252 | 3   | 24363 | 0.33333333 | 0.03071205 | 0.15026967 |



|            |                                                                                          |                    |                                           |    |     |     |       |            |            |            |
|------------|------------------------------------------------------------------------------------------|--------------------|-------------------------------------------|----|-----|-----|-------|------------|------------|------------|
| GO:0032707 | negative regulation of interleukin-23 production                                         | biological_process | regulation of biological process          | 1  | 252 | 3   | 24363 | 0.33333333 | 0.03071205 | 0.15026967 |
| GO:0032770 | positive regulation of monooxygenase activity                                            | biological_process | metabolic process                         | 1  | 252 | 3   | 24363 | 0.33333333 | 0.03071205 | 0.15026967 |
| GO:0035696 | monocyte extravasation                                                                   | biological_process | immune system process                     | 1  | 252 | 3   | 24363 | 0.33333333 | 0.03071205 | 0.15026967 |
| GO:0036245 | cellular response to menadione                                                           | biological_process | response to stimulus                      | 1  | 252 | 3   | 24363 | 0.33333333 | 0.03071205 | 0.15026967 |
| GO:0042418 | epinephrine biosynthetic process                                                         | biological_process | metabolic process                         | 1  | 252 | 3   | 24363 | 0.33333333 | 0.03071205 | 0.15026967 |
| GO:0045721 | negative regulation of gluconeogenesis                                                   | biological_process | metabolic process                         | 2  | 252 | 24  | 24363 | 0.08333333 | 0.02532372 | 0.15026967 |
| GO:0045989 | positive regulation of striated muscle contraction                                       | biological_process | regulation of biological process          | 1  | 252 | 3   | 24363 | 0.33333333 | 0.03071205 | 0.15026967 |
| GO:0046501 | protoporphyrinogen IX metabolic process                                                  | biological_process | metabolic process                         | 1  | 252 | 3   | 24363 | 0.33333333 | 0.03071205 | 0.15026967 |
| GO:0046878 | positive regulation of saliva secretion                                                  | biological_process | regulation of biological process          | 1  | 252 | 3   | 24363 | 0.33333333 | 0.03071205 | 0.15026967 |
| GO:0051654 | establishment of mitochondrion localization                                              | biological_process | localization                              | 1  | 252 | 3   | 24363 | 0.33333333 | 0.03071205 | 0.15026967 |
| GO:0052746 | inositol phosphorylation                                                                 | biological_process | metabolic process                         | 1  | 252 | 3   | 24363 | 0.33333333 | 0.03071205 | 0.15026967 |
| GO:0055085 | transmembrane transport                                                                  | biological_process | localization                              | 12 | 252 | 625 | 24363 | 0.0192     | 0.03012678 | 0.15026967 |
| GO:0060003 | copper ion export                                                                        | biological_process | localization                              | 1  | 252 | 3   | 24363 | 0.33333333 | 0.03071205 | 0.15026967 |
| GO:0060621 | negative regulation of cholesterol import                                                | biological_process | negative regulation of biological process | 1  | 252 | 3   | 24363 | 0.33333333 | 0.03071205 | 0.15026967 |
| GO:0061078 | positive regulation of prostaglandin secretion involved in immune response               | biological_process | regulation of biological process          | 1  | 252 | 3   | 24363 | 0.33333333 | 0.03071205 | 0.15026967 |
| GO:0061081 | positive regulation of myeloid leukocyte cytokine production involved in immune response | biological_process | regulation of biological process          | 1  | 252 | 3   | 24363 | 0.33333333 | 0.03071205 | 0.15026967 |
| GO:0061564 | axon development                                                                         | biological_process | developmental process                     | 2  | 252 | 25  | 24363 | 0.08       | 0.02734096 | 0.15026967 |
| GO:0061615 | glycolytic process through fructose-6-phosphate                                          | biological_process | metabolic process                         | 1  | 252 | 3   | 24363 | 0.33333333 | 0.03071205 | 0.15026967 |
| GO:0070165 | positive regulation of adiponectin secretion                                             | biological_process | regulation of biological process          | 1  | 252 | 3   | 24363 | 0.33333333 | 0.03071205 | 0.15026967 |
| GO:0070541 | response to platinum ion                                                                 | biological_process | response to stimulus                      | 1  | 252 | 3   | 24363 | 0.33333333 | 0.03071205 | 0.15026967 |
| GO:0070584 | mitochondrion morphogenesis                                                              | biological_process | developmental process                     | 2  | 252 | 26  | 24363 | 0.07692308 | 0.02942067 | 0.15026967 |
| GO:0071241 | cellular response to inorganic substance                                                 | biological_process | response to stimulus                      | 1  | 252 | 3   | 24363 | 0.33333333 | 0.03071205 | 0.15026967 |
| GO:0071277 | cellular response to calcium ion                                                         | biological_process | response to stimulus                      | 4  | 252 | 109 | 24363 | 0.03669725 | 0.02674507 | 0.15026967 |
| GO:0071379 | cellular response to prostaglandin stimulus                                              | biological_process | response to stimulus                      | 1  | 252 | 3   | 24363 | 0.33333333 | 0.03071205 | 0.15026967 |
| GO:0071461 | cellular response to redox state                                                         | biological_process | response to stimulus                      | 1  | 252 | 3   | 24363 | 0.33333333 | 0.03071205 | 0.15026967 |
| GO:0071472 | cellular response to salt stress                                                         | biological_process | response to stimulus                      | 1  | 252 | 3   | 24363 | 0.33333333 | 0.03071205 | 0.15026967 |
| GO:0071641 | negative regulation of macrophage inflammatory protein 1 alpha production                | biological_process | regulation of biological process          | 1  | 252 | 3   | 24363 | 0.33333333 | 0.03071205 | 0.15026967 |
| GO:0090662 | ATP hydrolysis coupled transmembrane transport                                           | biological_process | localization                              | 1  | 252 | 3   | 24363 | 0.33333333 | 0.03071205 | 0.15026967 |
| GO:0099185 | postsynaptic intermediate filament cytoskeleton organization                             | biological_process | cellular process                          | 1  | 252 | 3   | 24363 | 0.33333333 | 0.03071205 | 0.15026967 |
| GO:0099502 | calcium-dependent activation of synaptic vesicle fusion                                  | biological_process | regulation of biological process          | 1  | 252 | 3   | 24363 | 0.33333333 | 0.03071205 | 0.15026967 |
| GO:0101030 | tRNA-guanine transglycosylation                                                          | biological_process | metabolic process                         | 1  | 252 | 3   | 24363 | 0.33333333 | 0.03071205 | 0.15026967 |

|            |                                                                                                   |                    |                                  |   |     |     |       |            |            |            |
|------------|---------------------------------------------------------------------------------------------------|--------------------|----------------------------------|---|-----|-----|-------|------------|------------|------------|
| GO:1900363 | regulation of mRNA polyadenylation                                                                | biological_process | metabolic process                | 1 | 252 | 3   | 24363 | 0.33333333 | 0.03071205 | 0.15026967 |
| GO:1901687 | glutathione derivative biosynthetic process                                                       | biological_process | metabolic process                | 2 | 252 | 24  | 24363 | 0.08333333 | 0.02532372 | 0.15026967 |
| GO:1901897 | regulation of relaxation of cardiac muscle                                                        | biological_process | regulation of biological process | 1 | 252 | 3   | 24363 | 0.33333333 | 0.03071205 | 0.15026967 |
| GO:1902174 | positive regulation of keratinocyte apoptotic process                                             | biological_process | regulation of biological process | 1 | 252 | 3   | 24363 | 0.33333333 | 0.03071205 | 0.15026967 |
| GO:1903070 | negative regulation of ER-associated ubiquitin-dependent protein catabolic process                | biological_process | metabolic process                | 1 | 252 | 3   | 24363 | 0.33333333 | 0.03071205 | 0.15026967 |
| GO:1903923 | positive regulation of protein processing in phagocytic vesicle                                   | biological_process | metabolic process                | 1 | 252 | 3   | 24363 | 0.33333333 | 0.03071205 | 0.15026967 |
| GO:1904219 | positive regulation of CDP-diacylglycerol-serine O-phosphatidyltransferase activity               | biological_process | biological regulation            | 1 | 252 | 3   | 24363 | 0.33333333 | 0.03071205 | 0.15026967 |
| GO:1904222 | positive regulation of serine C-palmitoyltransferase activity                                     | biological_process | biological regulation            | 1 | 252 | 3   | 24363 | 0.33333333 | 0.03071205 | 0.15026967 |
| GO:1904251 | regulation of bile acid metabolic process                                                         | biological_process | metabolic process                | 1 | 252 | 3   | 24363 | 0.33333333 | 0.03071205 | 0.15026967 |
| GO:1904352 | positive regulation of protein catabolic process in the vacuole                                   | biological_process | metabolic process                | 1 | 252 | 3   | 24363 | 0.33333333 | 0.03071205 | 0.15026967 |
| GO:1904878 | negative regulation of calcium ion transmembrane transport via high voltage-gated calcium channel | biological_process | regulation of biological process | 1 | 252 | 3   | 24363 | 0.33333333 | 0.03071205 | 0.15026967 |
| GO:1905867 | epididymis development                                                                            | biological_process | reproduction                     | 1 | 252 | 3   | 24363 | 0.33333333 | 0.03071205 | 0.15026967 |
| GO:2000299 | negative regulation of Rho-dependent protein serine/threonine kinase activity                     | biological_process | metabolic process                | 1 | 252 | 3   | 24363 | 0.33333333 | 0.03071205 | 0.15026967 |
| GO:2000582 | positive regulation of ATP-dependent microtubule motor activity, plus-end-directed                | biological_process | biological regulation            | 1 | 252 | 3   | 24363 | 0.33333333 | 0.03071205 | 0.15026967 |
| GO:2001179 | regulation of interleukin-10 secretion                                                            | biological_process | regulation of biological process | 1 | 252 | 3   | 24363 | 0.33333333 | 0.03071205 | 0.15026967 |
| GO:0002026 | regulation of the force of heart contraction                                                      | biological_process | regulation of biological process | 2 | 252 | 27  | 24363 | 0.07407407 | 0.03156134 | 0.15051563 |
| GO:0006094 | gluconeogenesis                                                                                   | biological_process | metabolic process                | 3 | 252 | 66  | 24363 | 0.04545455 | 0.03105196 | 0.15051563 |
| GO:0006820 | anion transport                                                                                   | biological_process | localization                     | 2 | 252 | 27  | 24363 | 0.07407407 | 0.03156134 | 0.15051563 |
| GO:0007263 | nitric oxide mediated signal transduction                                                         | biological_process | regulation of biological process | 2 | 252 | 27  | 24363 | 0.07407407 | 0.03156134 | 0.15051563 |
| GO:0015698 | inorganic anion transport                                                                         | biological_process | localization                     | 2 | 252 | 27  | 24363 | 0.07407407 | 0.03156134 | 0.15051563 |
| GO:0043086 | negative regulation of catalytic activity                                                         | biological_process | biological regulation            | 3 | 252 | 66  | 24363 | 0.04545455 | 0.03105196 | 0.15051563 |
| GO:0046835 | carbohydrate phosphorylation                                                                      | biological_process | metabolic process                | 2 | 252 | 27  | 24363 | 0.07407407 | 0.03156134 | 0.15051563 |
| GO:0070266 | necroptotic process                                                                               | biological_process | cellular process                 | 2 | 252 | 27  | 24363 | 0.07407407 | 0.03156134 | 0.15051563 |
| GO:0021549 | cerebellum development                                                                            | biological_process | developmental process            | 3 | 252 | 67  | 24363 | 0.04477612 | 0.03226635 | 0.1533924  |
| GO:0051781 | positive regulation of cell division                                                              | biological_process | regulation of biological process | 3 | 252 | 68  | 24363 | 0.04411765 | 0.03350528 | 0.15878131 |
| GO:0007268 | chemical synaptic transmission                                                                    | biological_process | signaling                        | 7 | 252 | 294 | 24363 | 0.02380952 | 0.03388437 | 0.16007444 |
| GO:0006099 | tricarboxylic acid cycle                                                                          | biological_process | metabolic process                | 3 | 252 | 69  | 24363 | 0.04347826 | 0.03476867 | 0.16373871 |
| GO:0001573 | ganglioside metabolic process                                                                     | biological_process | metabolic process                | 1 | 252 | 4   | 24363 | 0.25       | 0.04073916 | 0.16459494 |
| GO:0002367 | cytokine production involved in immune response                                                   | biological_process | response to stimulus             | 1 | 252 | 4   | 24363 | 0.25       | 0.04073916 | 0.16459494 |

|            |                                                                         |                    |                                  |   |     |    |       |            |            |            |
|------------|-------------------------------------------------------------------------|--------------------|----------------------------------|---|-----|----|-------|------------|------------|------------|
| GO:0006400 | tRNA modification                                                       | biological_process | metabolic process                | 2 | 252 | 29 | 24363 | 0.06896552 | 0.03601974 | 0.16459494 |
| GO:0006409 | tRNA export from nucleus                                                | biological_process | localization                     | 1 | 252 | 4  | 24363 | 0.25       | 0.04073916 | 0.16459494 |
| GO:0006884 | cell volume homeostasis                                                 | biological_process | cellular process                 | 2 | 252 | 31 | 24363 | 0.06451613 | 0.04070465 | 0.16459494 |
| GO:0010107 | potassium ion import                                                    | biological_process | localization                     | 1 | 252 | 4  | 24363 | 0.25       | 0.04073916 | 0.16459494 |
| GO:0010897 | negative regulation of triglyceride catabolic process                   | biological_process | metabolic process                | 1 | 252 | 4  | 24363 | 0.25       | 0.04073916 | 0.16459494 |
| GO:0010903 | negative regulation of very-low-density lipoprotein particle remodeling | biological_process | multicellular organismal process | 1 | 252 | 4  | 24363 | 0.25       | 0.04073916 | 0.16459494 |
| GO:0010916 | negative regulation of very-low-density lipoprotein particle clearance  | biological_process | regulation of biological process | 1 | 252 | 4  | 24363 | 0.25       | 0.04073916 | 0.16459494 |
| GO:0014003 | oligodendrocyte development                                             | biological_process | developmental process            | 2 | 252 | 29 | 24363 | 0.06896552 | 0.03601974 | 0.16459494 |
| GO:0015827 | tryptophan transport                                                    | biological_process | localization                     | 1 | 252 | 4  | 24363 | 0.25       | 0.04073916 | 0.16459494 |
| GO:0015842 | aminergic neurotransmitter loading into synaptic vesicle                | biological_process | localization                     | 1 | 252 | 4  | 24363 | 0.25       | 0.04073916 | 0.16459494 |
| GO:0018963 | phthalate metabolic process                                             | biological_process | metabolic process                | 1 | 252 | 4  | 24363 | 0.25       | 0.04073916 | 0.16459494 |
| GO:0019243 | methylglyoxal catabolic process to D-lactate via S-lactoyl-glutathione  | biological_process | cellular process                 | 1 | 252 | 4  | 24363 | 0.25       | 0.04073916 | 0.16459494 |
| GO:0019550 | glutamate catabolic process to aspartate                                | biological_process | metabolic process                | 1 | 252 | 4  | 24363 | 0.25       | 0.04073916 | 0.16459494 |
| GO:0019551 | glutamate catabolic process to 2-oxoglutarate                           | biological_process | metabolic process                | 1 | 252 | 4  | 24363 | 0.25       | 0.04073916 | 0.16459494 |
| GO:0021762 | substantia nigra development                                            | biological_process | developmental process            | 3 | 252 | 70 | 24363 | 0.04285714 | 0.03605644 | 0.16459494 |
| GO:0032225 | regulation of synaptic transmission, dopaminergic                       | biological_process | signaling                        | 1 | 252 | 4  | 24363 | 0.25       | 0.04073916 | 0.16459494 |
| GO:0032673 | regulation of interleukin-4 production                                  | biological_process | regulation of biological process | 1 | 252 | 4  | 24363 | 0.25       | 0.04073916 | 0.16459494 |
| GO:0032957 | inositol trisphosphate metabolic process                                | biological_process | metabolic process                | 1 | 252 | 4  | 24363 | 0.25       | 0.04073916 | 0.16459494 |
| GO:0033005 | positive regulation of mast cell activation                             | biological_process | cellular process                 | 1 | 252 | 4  | 24363 | 0.25       | 0.04073916 | 0.16459494 |
| GO:0033326 | cerebrospinal fluid secretion                                           | biological_process | localization                     | 1 | 252 | 4  | 24363 | 0.25       | 0.04073916 | 0.16459494 |
| GO:0033499 | galactose catabolic process via UDP-galactose                           | biological_process | metabolic process                | 1 | 252 | 4  | 24363 | 0.25       | 0.04073916 | 0.16459494 |
| GO:0033623 | regulation of integrin activation                                       | biological_process | regulation of biological process | 1 | 252 | 4  | 24363 | 0.25       | 0.04073916 | 0.16459494 |
| GO:0034394 | protein localization to cell surface                                    | biological_process | localization                     | 2 | 252 | 31 | 24363 | 0.06451613 | 0.04070465 | 0.16459494 |
| GO:0042133 | neurotransmitter metabolic process                                      | biological_process | metabolic process                | 1 | 252 | 4  | 24363 | 0.25       | 0.04073916 | 0.16459494 |
| GO:0043490 | malate-aspartate shuttle                                                | biological_process | metabolic process                | 1 | 252 | 4  | 24363 | 0.25       | 0.04073916 | 0.16459494 |
| GO:0043648 | dicarboxylic acid metabolic process                                     | biological_process | metabolic process                | 1 | 252 | 4  | 24363 | 0.25       | 0.04073916 | 0.16459494 |
| GO:0044209 | AMP salvage                                                             | biological_process | metabolic process                | 1 | 252 | 4  | 24363 | 0.25       | 0.04073916 | 0.16459494 |
| GO:0045292 | mRNA cis splicing, via spliceosome                                      | biological_process | metabolic process                | 2 | 252 | 30 | 24363 | 0.06666667 | 0.03833458 | 0.16459494 |
| GO:0045453 | bone resorption                                                         | biological_process | multicellular organismal process | 2 | 252 | 31 | 24363 | 0.06451613 | 0.04070465 | 0.16459494 |
| GO:0045472 | response to ether                                                       | biological_process | response to stimulus             | 1 | 252 | 4  | 24363 | 0.25       | 0.04073916 | 0.16459494 |
| GO:0045833 | negative regulation of lipid metabolic process                          | biological_process | metabolic process                | 1 | 252 | 4  | 24363 | 0.25       | 0.04073916 | 0.16459494 |
| GO:0046732 | active induction of host immune response by virus                       | biological_process | regulation of biological process | 1 | 252 | 4  | 24363 | 0.25       | 0.04073916 | 0.16459494 |

|            |                                                                                                                     |                    |                                  |   |     |     |       |            |            |            |
|------------|---------------------------------------------------------------------------------------------------------------------|--------------------|----------------------------------|---|-----|-----|-------|------------|------------|------------|
| GO:0048499 | synaptic vesicle membrane organization                                                                              | biological_process | cellular process                 | 1 | 252 | 4   | 24363 | 0.25       | 0.04073916 | 0.16459494 |
| GO:0050851 | antigen receptor-mediated signaling pathway                                                                         | biological_process | regulation of biological process | 1 | 252 | 4   | 24363 | 0.25       | 0.04073916 | 0.16459494 |
| GO:0060221 | retinal rod cell differentiation                                                                                    | biological_process | developmental process            | 1 | 252 | 4   | 24363 | 0.25       | 0.04073916 | 0.16459494 |
| GO:0060263 | regulation of respiratory burst                                                                                     | biological_process | metabolic process                | 1 | 252 | 4   | 24363 | 0.25       | 0.04073916 | 0.16459494 |
| GO:0060414 | aorta smooth muscle tissue morphogenesis                                                                            | biological_process | developmental process            | 1 | 252 | 4   | 24363 | 0.25       | 0.04073916 | 0.16459494 |
| GO:0060988 | lipid tube assembly                                                                                                 | biological_process | cellular process                 | 1 | 252 | 4   | 24363 | 0.25       | 0.04073916 | 0.16459494 |
| GO:0071395 | cellular response to jasmonic acid stimulus                                                                         | biological_process | response to stimulus             | 1 | 252 | 4   | 24363 | 0.25       | 0.04073916 | 0.16459494 |
| GO:0071801 | regulation of podosome assembly                                                                                     | biological_process | regulation of biological process | 1 | 252 | 4   | 24363 | 0.25       | 0.04073916 | 0.16459494 |
| GO:0086016 | AV node cell action potential                                                                                       | biological_process | regulation of biological process | 1 | 252 | 4   | 24363 | 0.25       | 0.04073916 | 0.16459494 |
| GO:0086053 | AV node cell to bundle of His cell communication by electrical coupling                                             | biological_process | regulation of biological process | 1 | 252 | 4   | 24363 | 0.25       | 0.04073916 | 0.16459494 |
| GO:0090023 | positive regulation of neutrophil chemotaxis                                                                        | biological_process | regulation of biological process | 2 | 252 | 30  | 24363 | 0.06666667 | 0.03833458 | 0.16459494 |
| GO:0097494 | regulation of vesicle size                                                                                          | biological_process | cellular process                 | 1 | 252 | 4   | 24363 | 0.25       | 0.04073916 | 0.16459494 |
| GO:0099132 | ATP hydrolysis coupled cation transmembrane transport                                                               | biological_process | localization                     | 2 | 252 | 31  | 24363 | 0.06451613 | 0.04070465 | 0.16459494 |
| GO:1900038 | negative regulation of cellular response to hypoxia                                                                 | biological_process | regulation of biological process | 1 | 252 | 4   | 24363 | 0.25       | 0.04073916 | 0.16459494 |
| GO:1902960 | negative regulation of aspartic-type endopeptidase activity involved in amyloid precursor protein catabolic process | biological_process | metabolic process                | 1 | 252 | 4   | 24363 | 0.25       | 0.04073916 | 0.16459494 |
| GO:1904373 | response to kainic acid                                                                                             | biological_process | response to stimulus             | 1 | 252 | 4   | 24363 | 0.25       | 0.04073916 | 0.16459494 |
| GO:1904395 | positive regulation of skeletal muscle acetylcholine-gated channel clustering                                       | biological_process | regulation of biological process | 1 | 252 | 4   | 24363 | 0.25       | 0.04073916 | 0.16459494 |
| GO:1990089 | response to nerve growth factor                                                                                     | biological_process | response to stimulus             | 1 | 252 | 4   | 24363 | 0.25       | 0.04073916 | 0.16459494 |
| GO:2001234 | negative regulation of apoptotic signaling pathway                                                                  | biological_process | regulation of biological process | 2 | 252 | 31  | 24363 | 0.06451613 | 0.04070465 | 0.16459494 |
| GO:0006805 | xenobiotic metabolic process                                                                                        | biological_process | metabolic process                | 4 | 252 | 126 | 24363 | 0.03174603 | 0.04210224 | 0.16964726 |
| GO:0035725 | sodium ion transmembrane transport                                                                                  | biological_process | localization                     | 3 | 252 | 75  | 24363 | 0.04       | 0.04285758 | 0.17131664 |
| GO:0050890 | cognition                                                                                                           | biological_process | multicellular organismal process | 3 | 252 | 75  | 24363 | 0.04       | 0.04285758 | 0.17131664 |
| GO:0072659 | protein localization to plasma membrane                                                                             | biological_process | localization                     | 5 | 252 | 184 | 24363 | 0.02717391 | 0.04281277 | 0.17131664 |
| GO:0006090 | pyruvate metabolic process                                                                                          | biological_process | metabolic process                | 2 | 252 | 32  | 24363 | 0.0625     | 0.04312855 | 0.17149004 |
| GO:0051966 | regulation of synaptic transmission, glutamatergic                                                                  | biological_process | regulation of biological process | 2 | 252 | 32  | 24363 | 0.0625     | 0.04312855 | 0.17149004 |
| GO:0007005 | mitochondrion organization                                                                                          | biological_process | cellular process                 | 4 | 252 | 128 | 24363 | 0.03125    | 0.04417679 | 0.17518191 |
| GO:0034097 | response to cytokine                                                                                                | biological_process | response to stimulus             | 3 | 252 | 76  | 24363 | 0.03947368 | 0.04428952 | 0.17518191 |
| GO:0006754 | ATP biosynthetic process                                                                                            | biological_process | metabolic process                | 2 | 252 | 34  | 24363 | 0.05882353 | 0.04813246 | 0.17527457 |
| GO:0016311 | dephosphorylation                                                                                                   | biological_process | metabolic process                | 5 | 252 | 190 | 24363 | 0.02631579 | 0.04796427 | 0.17527457 |
| GO:0032355 | response to estradiol                                                                                               | biological_process | response to stimulus             | 4 | 252 | 131 | 24363 | 0.03053435 | 0.0473945  | 0.17527457 |
| GO:0035025 | positive regulation of Rho protein signal transduction                                                              | biological_process | regulation of biological process | 2 | 252 | 34  | 24363 | 0.05882353 | 0.04813246 | 0.17527457 |
| GO:0043278 | response to morphine                                                                                                | biological_process | response to stimulus             | 2 | 252 | 34  | 24363 | 0.05882353 | 0.04813246 | 0.17527457 |

|            |                                                              |                    |                                  |   |     |     |       |            |            |            |
|------------|--------------------------------------------------------------|--------------------|----------------------------------|---|-----|-----|-------|------------|------------|------------|
| GO:0045766 | positive regulation of angiogenesis                          | biological_process | developmental process            | 5 | 252 | 190 | 24363 | 0.02631579 | 0.04796427 | 0.17527457 |
| GO:0070301 | cellular response to hydrogen peroxide                       | biological_process | response to stimulus             | 3 | 252 | 78  | 24363 | 0.03846154 | 0.04722413 | 0.17527457 |
| GO:0086002 | cardiac muscle cell action potential involved in contraction | biological_process | multicellular organismal process | 2 | 252 | 33  | 24363 | 0.06060606 | 0.04560493 | 0.17527457 |
| GO:1901223 | negative regulation of NIK/NF-kappaB signaling               | biological_process | regulation of biological process | 2 | 252 | 34  | 24363 | 0.05882353 | 0.04813246 | 0.17527457 |

---
