# Supplementary material for: The circ_0002538/miR-138-5p/plasmolipin axis regulates Schwann cell migration and myelination in diabetic peripheral neuropathy
Source: PubMed Central journal article supplement — Neural Regen Res. 2022 Oct 11;18(7):1591–600. doi: 10.4103/1673-5374.355979 (PMC10075099; doi:10.4103/1673-5374.355979), 2022-10-11
Supplement: NRR-18-1591_Suppl4.pdf [file NRR-18-1591_Suppl4.pdf]

**Additional Table 10 The differentially expressed mRNAs analyzed in this study were selected from the results of mRNA sequencing analysis**

| EnsemblID       | GeneName   | Description                                          | start     | end       | strand | GeneID    | chromosom | PLP  | PLP_NC | log2FC       | Pvalue     | padj       |
|-----------------|------------|------------------------------------------------------|-----------|-----------|--------|-----------|-----------|------|--------|--------------|------------|------------|
| ENSG00000156509 | FBXO43     | F-box protein 43                                     | 100133360 | 100145800 | -      | 286151    | 8         | 32   | 9      | 1.792929977  | 0.00127928 | 0.14621903 |
| ENSG00000281021 | AL078581.3 | NA                                                   | 149576089 | 149590864 | -      | NA        | 6         | 9    | 1      | 2.998267012  | 0.02463495 | 0.74193929 |
| ENSG00000145248 | SLC10A4    | solute carrier family 10 member 4                    | 48483343  | 48489196  | +      | 201780    | 4         | 0    | 8      | -6.033772917 | 0.00894141 | 0.44242407 |
| ENSG00000258839 | MC1R       | melanocortin 1 receptor                              | 89912119  | 89920977  | +      | 4157      | 16        | 5    | 18     | -1.845069119 | 0.01534811 | 0.5958645  |
| ENSG00000169495 | HTRA4      | HtrA serine peptidase 4                              | 38974164  | 38988662  | +      | 203100    | 8         | 7    | 0      | 5.821602045  | 0.01729787 | 0.5958645  |
| ENSG00000433555 | ZIC2       | Zic family member 2                                  | 99981772  | 99986773  | +      | 7546      | 13        | 23   | 5      | 2.151100271  | 0.00182283 | 0.18408612 |
| ENSG00000255326 | AP001922.5 | NA                                                   | 75583196  | 75594665  | +      | 105369391 | 11        | 10   | 2      | 2.230135398  | 0.04430615 | 0.96117306 |
| ENSG00000211448 | DIO2       | iodothyronine deiodinase 2                           | 80197527  | 80387757  | -      | 1734      | 14        | 18   | 38     | -1.0957119   | 0.02339332 | 0.72981751 |
| ENSG00000235806 | AF241728.1 | NA                                                   | 38770331  | 38799658  | +      | NA        | X         | 29   | 8      | 1.818972394  | 0.00188854 | 0.18640307 |
| ENSG00000187955 | COL14A1    | collagen type XIV alpha 1 chain                      | 120059780 | 120372036 | +      | 7373      | 8         | 8    | 21     | -1.401338831 | 0.03484493 | 0.84532906 |
| ENSG00000270133 | AC025766.1 | NA                                                   | 94611906  | 94618122  | -      | NA        | 5         | 2    | 14     | -2.755008525 | 0.00572059 | 0.35537281 |
| ENSG00000249252 | AC098829.1 | NA                                                   | 15004942  | 15427914  | -      | 101929095 | 4         | 22   | 2      | 3.357813705  | 8.47E-05   | 0.02652295 |
| ENSG00000198590 | C3orf35    | NA                                                   | 37386269  | 37435497  | +      | 339883    | 3         | 6    | 18     | -1.58795721  | 0.0310526  | 0.8324078  |
| ENSG00000163632 | C3orf49    | chromosome 3 open reading frame 49                   | 63819362  | 63848636  | +      | 132200    | 3         | 0    | 10     | -6.351290168 | 0.00242129 | 0.21443156 |
| ENSG00000125730 | C3         | complement C3                                        | 6677704   | 6730562   | -      | 718       | 19        | 2904 | 1319   | 1.115450921  | 1.39E-07   | 0.00022456 |
| ENSG00000039537 | C6         | complement C6                                        | 41142234  | 41261438  | -      | 729       | 5         | 0    | 7      | -5.844270205 | 0.01729787 | 0.5958645  |
| ENSG00000112936 | C7         | complement C7                                        | 40909252  | 40982939  | +      | 730       | 5         | 19   | 125    | -2.732824433 | 2.95E-13   | 2.28E-09   |
| ENSG00000201457 | SNORA55    | NA                                                   | 39567374  | 39567508  | -      | 677834    | 1         | 13   | 0      | 6.702865037  | 0.00035249 | 0.06443635 |
| ENSG00000207523 | SNORA66    | NA                                                   | 92840719  | 92840851  | +      | 26782     | 1         | 8    | 1      | 2.830829713  | 0.04333145 | 0.95821355 |
| ENSG00000264176 | MAGOH2P    | NA                                                   | 10716002  | 10716511  | -      | NA        | 17        | 11   | 1      | 3.284147477  | 0.00788025 | 0.42560136 |
| ENSG00000243296 | AC078828.1 | NA                                                   | 99500347  | 99505508  | +      | NA        | 3         | 9    | 1      | 2.998267012  | 0.02463495 | 0.74193929 |
| ENSG00000125246 | CLYBL      | citrate lyase beta like                              | 99606669  | 99897134  | +      | 171425    | 13        | 21   | 44     | -1.085616936 | 0.01657789 | 0.5958645  |
| ENSG00000225963 | AC009950.1 | NA                                                   | 230121370 | 230174223 | +      | NA        | 2         | 17   | 2      | 2.988259266  | 0.00118753 | 0.14474367 |
| ENSG00000278434 | AC023830.3 | NA                                                   | 4532216   | 4533670   | -      | NA        | 16        | 6    | 0      | 5.603454913  | 0.03361661 | 0.8324078  |
| ENSG00000047597 | XK         | X-linked Kx blood group                              | 37685759  | 37732130  | +      | 7504      | X         | 12   | 1      | 3.408316198  | 0.00444385 | 0.30691904 |
| ENSG00000272263 | AC034198.2 | NA                                                   | 12832219  | 12832728  | -      | NA        | 3         | 10   | 2      | 2.230135398  | 0.04430615 | 0.96117306 |
| ENSG00000182584 | ACTL10     | actin like 10                                        | 33666498  | 33668525  | +      | 170487    | 20        | 14   | 37     | -1.417072169 | 0.005121   | 0.33119861 |
| ENSG00000250461 | AC122718.1 | NA                                                   | 61375112  | 61375855  | +      | NA        | 5         | 91   | 44     | 1.023226197  | 0.00229438 | 0.21443156 |
| ENSG00000124731 | TREM1      | triggering receptor expressed on myeloid cells 1     | 41267926  | 41286719  | -      | 54210     | 6         | 7    | 0      | 5.821602045  | 0.01729787 | 0.5958645  |
| ENSG00000224132 | AC112715.1 | NA                                                   | 237257091 | 237257676 | +      | NA        | 2         | 6    | 0      | 5.603454913  | 0.03361661 | 0.8324078  |
| ENSG00000268030 | AC005253.1 | NA                                                   | 18557775  | 18561560  | -      | NA        | 19        | 39   | 11     | 1.791378959  | 0.00043    | 0.07427378 |
| ENSG00000279923 | AC022417.1 | NA                                                   | 31558573  | 31559875  | +      | NA        | 5         | 13   | 1      | 3.522639813  | 0.00250381 | 0.21723364 |
| ENSG00000188211 | NCR3LG1    | natural killer cell cytotoxicity receptor 3 ligand 1 | 17351726  | 17377341  | +      | 374383    | 11        | 274  | 128    | 1.074225478  | 2.91E-05   | 0.01270536 |
| ENSG00000265394 | AC104984.2 | NA                                                   | 30090366  | 30117497  | -      | NA        | 17        | 0    | 8      | -6.033772917 | 0.00894141 | 0.44242407 |
| ENSG00000171462 | DLK2       | delta like non-canonical Notch ligand 2              | 43450352  | 43456632  | -      | 65989     | 6         | 34   | 80     | -1.254436092 | 0.00049319 | 0.08105351 |
| ENSG00000253406 | AC012613.2 | NA                                                   | 149216523 | 149276805 | -      | NA        | 5         | 13   | 2      | 2.604498362  | 0.00961124 | 0.45874658 |
| ENSG00000003989 | SLC7A2     | solute carrier family 7 member 2                     | 17497088  | 17570573  | +      | 6542      | 8         | 2276 | 1096   | 1.031096469  | 1.25E-06   | 0.001307   |
| ENSG00000065618 | COL17A1    | collagen type XVII alpha 1 chain                     | 104031286 | 104086002 | -      | 1308      | 10        | 23   | 7      | 1.675683267  | 0.00903825 | 0.44449827 |
| ENSG00000248858 | FLJ46284   | NA                                                   | 92699742  | 92879502  | -      | 441369    | 8         | 0    | 9      | -6.201249115 | 0.00464266 | 0.30691904 |
| ENSG00000173334 | TRIB1      | tribbles pseudokinase 1                              | 125430321 | 125438405 | +      | 10221     | 8         | 247  | 106    | 1.196422895  | 6.48E-06   | 0.00426639 |
| ENSG00000244480 | AC005154.3 | NA                                                   | 30523143  | 30524535  | -      | NA        | 7         | 8    | 0      | 6.011054937  | 0.00894141 | 0.44242407 |
| ENSG00000143882 | ATP6V1C2   | ATPase H+ transporting V1 subunit C2                 | 10721649  | 10785110  | +      | 245973    | 2         | 21   | 7      | 1.545187146  | 0.01916925 | 0.63844355 |
| ENSG00000279118 | AC093535.2 | NA                                                   | 126496279 | 126498604 | +      | NA        | 5         | 45   | 104    | -1.229344794 | 0.00020244 | 0.04606088 |
| ENSG00000185669 | SNAI3      | snail family transcriptional repressor 3             | 88677682  | 88686493  | -      | 333929    | 16        | 0    | 8      | -6.033772917 | 0.00894141 | 0.44242407 |
| ENSG00000250067 | YJEFN3     | YjeF N-terminal domain containing 3                  | 19528861  | 19537581  | +      | 374887    | 19        | 45   | 22     | 1.005273671  | 0.01879946 | 0.63022679 |
| ENSG00000243055 | GK-AS1     | NA                                                   | 30699998  | 30724174  | -      | NA        | X         | 9    | 1      | 2.998267012  | 0.02463495 | 0.74193929 |
| ENSG00000246985 | SOCS2-AS1  | NA                                                   | 93542463  | 93571768  | -      | 144481    | 12        | 12   | 28     | -1.236771091 | 0.02851606 | 0.80657876 |
| ENSG00000158856 | DMTN       | dematin actin binding protein                        | 22048995  | 22082527  | +      | 2039      | 8         | 16   | 2      | 2.90145966   | 0.00200946 | 0.19394578 |
| ENSG00000251257 | AC010457.1 | NA                                                   | 38460925  | 38468339  | -      | NA        | 5         | 22   | 7      | 1.611910175  | 0.01319757 | 0.55984925 |
| ENSG00000172780 | RAB43      | RAB43, member RAS oncogene family                    | 129087569 | 129122801 | -      | 339122    | 3         | 14   | 37     | -1.417072169 | 0.005121   | 0.33119861 |
| ENSG00000188060 | RAB42      | RAB42, member RAS oncogene family                    | 28592200  | 28595443  | +      | 115273    | 1         | 8    | 20     | -1.33137288  | 0.04895303 | 1          |
| ENSG00000236453 | AC003092.1 | NA                                                   | 94022833  | 94066661  | +      | NA        | 7         | 276  | 129    | 1.073496615  | 2.87E-05   | 0.01270536 |
| ENSG00000123892 | RAB38      | RAB38, member RAS oncogene family                    | 88113242  | 88175467  | -      | 23682     | 11        | 37   | 4      | 3.147240528  | 9.44E-07   | 0.00106956 |
| ENSG00000127585 | FBXL16     | F-box and leucine rich repeat protein 16             | 692498    | 705829    | -      | 146330    | 16        | 47   | 17     | 1.437430498  | 0.001266   | 0.14621903 |
| ENSG00000169885 | CALML6     | calmodulin like 6                                    | 1914827   | 1917296   | +      | 163688    | 1         | 16   | 2      | 2.90145966   | 0.00200946 | 0.19394578 |
| ENSG00000223573 | TINCR      | TINCR ubiquitin domain containing                    | 5558167   | 5568034   | -      | 257000    | 19        | 18   | 1      | 3.988273079  | 0.00014282 | 0.03734573 |
| ENSG00000225399 | AC121247.1 | NA                                                   | 49260085  | 49261316  | +      | NA        | 3         | 1    | 9      | -3.041533225 | 0.02463495 | 0.74193929 |
| ENSG00000278789 | AL391988.1 | NA                                                   | 117267116 | 117268668 | -      | NA        | 10        | 13   | 29     | -1.17285419  | 0.03350994 | 0.8324078  |
| ENSG00000140511 | HAPLN3     | hyaluronan and proteoglycan link protein 3           | 88877288  | 88895626  | -      | 145864    | 15        | 32   | 79     | -1.323446968 | 0.00028091 | 0.05673573 |
| ENSG00000213221 | DNLZ       | DNL-type zinc finger                                 | 136359480 | 136363789 | -      | 728489    | 9         | 6    | 0      | 5.603454913  | 0.03361661 | 0.8324078  |
| ENSG00000272791 | AC073389.3 | NA                                                   | 73630556  | 73631490  | +      | NA        | 10        | 1    | 8      | -2.874057027 | 0.04333145 | 0.95821355 |
| ENSG00000272420 | AL513477.2 | NA                                                   | 2363061   | 2363628   | -      | NA        | 1         | 0    | 16     | -7.02272042  | 5.33E-05   | 0.0193511  |
| ENSG00000269896 | AL513477.1 | NA                                                   | 2350414   | 2352820   | -      | 100129534 | 1         | 2    | 23     | -3.466250758 | 5.00E-05   | 0.01913526 |
| ENSG00000270048 | AC068790.4 | NA                                                   | 123962555 | 123962817 | -      | NA        | 12        | 8    | 0      | 6.011054937  | 0.00894141 | 0.44242407 |
| ENSG00000270130 | AC068790.7 | NA                                                   | 123960717 | 123961244 | -      | NA        | 12        | 9    | 1      | 2.998267012  | 0.02463495 | 0.74193929 |
| ENSG00000202314 | SNORD6     | NA                                                   | 93731502  | 93731574  | -      | 692075    | 11        | 10   | 2      | 2.230135398  | 0.04430615 | 0.96117306 |
| ENSG00000272356 | AL080317.3 | NA                                                   | 111309203 | 111313517 | +      | NA        | 6         | 2    | 18     | -3.114761185 | 0.00070095 | 0.10003166 |
| ENSG00000235016 | SEMA3F-AS1 | NA                                                   | 50116022  | 50156085  | -      | 100129060 | 3         | 2    | 11     | -2.410535462 | 0.02678048 | 0.77212427 |
| ENSG00000178623 | GPR35      | G protein-coupled receptor 35                        | 240605431 | 240631259 | +      | 2859      | 2         | 6    | 0      | 5.603454913  | 0.03361661 | 0.8324078  |
| ENSG00000261526 | AC012615.1 | NA                                                   | 1874871   | 1876169   | -      | NA        | 19        | 9    | 1      | 2.998267012  | 0.02463495 | 0.74193929 |
| ENSG00000162073 | PAQR4      | progesterone and adipoQ receptor family member 4     | 2969245   | 2973489   | +      | 124222    | 16        | 69   | 23     | 1.55676449   | 6.47E-05   | 0.02231598 |
| ENSG00000137819 | PAQR5      | progesterone and adipoQ receptor family member 5     | 69298947  | 69407780  | +      | 54852     | 15        | 23   | 9      | 1.318704357  | 0.03063511 | 0.8324078  |
| ENSG00000260190 | AL807752.5 | NA                                                   | 136937169 | 136937988 | -      | NA        | 9         | 18   | 1      | 3.988273079  | 0.00014282 | 0.03734573 |
| ENSG00000223820 | CFL1P1     | NA                                                   | 87817928  | 87845612  | +      | 142913    | 10        | 0    | 9      | -6.201249115 | 0.00464266 | 0.30691904 |
| ENSG00000082293 | COL19A1    | collagen type XIX alpha 1 chain                      | 69866571  | 70209976  | +      | 1310      | 6         | 18   | 3      | 2.51352      |            |            |

|                 |             |                                                                  |           |           |   |           |    |     |     |              |            |            |
|-----------------|-------------|------------------------------------------------------------------|-----------|-----------|---|-----------|----|-----|-----|--------------|------------|------------|
| ENSG00000260448 | LCMT1-AS1   | NA                                                               | 25085592  | 25111555  | - | NA        | 16 | 49  | 24  | 1.002944653  | 0.01513057 | 0.5958645  |
| ENSG00000256195 | AP002518.1  | NA                                                               | 114360635 | 114380045 | - | 101928940 | 11 | 7   | 0   | 5.821602045  | 0.01729787 | 0.5958645  |
| ENSG00000211714 | TRBV7-3     | T cell receptor beta variable 7-3                                | 142384329 | 142384841 | + | NA        | 7  | 6   | 0   | 5.603454913  | 0.03361661 | 0.8324078  |
| ENSG00000111863 | ADTRP       | androgen dependent TFPI regulating protein                       | 11712054  | 11807046  | - | 84830     | 6  | 93  | 37  | 1.303758882  | 0.00015061 | 0.03862803 |
| ENSG00000169116 | PARM1       | prostate androgen-regulated mucin-like protein 1                 | 74933095  | 75050115  | + | 25849     | 4  | 21  | 3   | 2.734480089  | 0.00055646 | 0.08847317 |
| ENSG00000169067 | ACTBL2      | actin, beta like 2                                               | 57480016  | 57482809  | - | 345651    | 5  | 32  | 11  | 1.506992692  | 0.00474403 | 0.31072044 |
| ENSG00000227214 | HCG15       | NA                                                               | 28986203  | 28987484  | + | NA        | 6  | 10  | 0   | 6.328502073  | 0.00242129 | 0.21443156 |
| ENSG00000185885 | IFITM1      | interferon induced transmembrane protein 1                       | 313506    | 315272    | + | 8519      | 11 | 93  | 192 | -1.067854784 | 0.00010541 | 0.02940749 |
| ENSG00000171004 | HS6ST2      | heparan sulfate 6-O-sulfotransferase 2                           | 132626016 | 132961395 | - | 90161     | X  | 23  | 2   | 3.421586797  | 5.00E-05   | 0.01913526 |
| ENSG00000185352 | HS6ST3      | heparan sulfate 6-O-sulfotransferase 3                           | 96090839  | 96839562  | + | 266722    | 13 | 20  | 8   | 1.285725268  | 0.04895303 | 1          |
| ENSG00000204622 | HLA-J       | NA                                                               | 30005971  | 30009956  | + | 3137      | 6  | 9   | 0   | 6.178492236  | 0.00464266 | 0.30691904 |
| ENSG00000226763 | SRRM5       | serine/arginine repetitive matrix 5                              | 43596617  | 43614497  | + | 100170229 | 19 | 12  | 3   | 1.93356416   | 0.04197539 | 0.95430001 |
| ENSG00000125895 | TMEM74B     | transmembrane protein 74B                                        | 1180561   | 1185415   | - | 55321     | 20 | 32  | 4   | 2.938552002  | 9.87E-06   | 0.0055895  |
| ENSG00000263345 | AC006435.2  | NA                                                               | 2375061   | 2379306   | - | NA        | 17 | 28  | 13  | 1.076623878  | 0.04444927 | 0.96117306 |
| ENSG00000139211 | AMIGO2      | adhesion molecule with Ig like domain 2                          | 47075707  | 47079951  | - | 347902    | 12 | 716 | 352 | 1.001056943  | 1.01E-05   | 0.00567852 |
| ENSG00000138161 | CUZD1       | CUB and zona pellucida like domains 1                            | 122832149 | 122850793 | - | 50624     | 10 | 17  | 34  | -1.017671537 | 0.04382563 | 0.96117306 |
| ENSG00000244357 | RN7SL145P   | NA                                                               | 45742675  | 45742970  | + | NA        | 3  | 8   | 0   | 6.011054937  | 0.00894141 | 0.44242407 |
| ENSG00000134755 | DSC2        | desmocollin 2                                                    | 31058840  | 31102415  | + | 1824      | 18 | 11  | 0   | 6.464372701  | 0.00126829 | 0.14621903 |
| ENSG00000134762 | DSC3        | desmocollin 3                                                    | 30990008  | 31042815  | - | 1825      | 18 | 24  | 58  | -1.291618228 | 0.00178899 | 0.18307847 |
| ENSG00000169248 | CXCL11      | C-X-C motif chemokine ligand 11                                  | 76033682  | 76041415  | - | 6373      | 4  | 15  | 3   | 2.252490968  | 0.0103193  | 0.47399509 |
| ENSG00000224746 | AC015987.1  | NA                                                               | 135926455 | 135932881 | + | NA        | 7  | 8   | 1   | 2.830829713  | 0.04333145 | 0.95821355 |
| ENSG00000272301 | AP002360.4  | NA                                                               | 76389648  | 76390128  | + | NA        | 11 | 6   | 0   | 5.603454913  | 0.03361661 | 0.8324078  |
| ENSG00000233767 | PSMA6P3     | NA                                                               | 46072085  | 46072248  | - | NA        | 21 | 6   | 0   | 5.603454913  | 0.03361661 | 0.8324078  |
| ENSG00000149968 | MMP3        | matrix metalloproteinase 3                                       | 102835801 | 102843803 | - | 4314      | 11 | 64  | 11  | 2.504160758  | 5.09E-08   | 0.00010303 |
| ENSG00000118113 | MMP8        | matrix metalloproteinase 8                                       | 102711795 | 102727050 | - | 4317      | 11 | 11  | 1   | 3.284147477  | 0.00788025 | 0.42560136 |
| ENSG00000176928 | GCNT4       | glucosaminyl (N-acetyl) transferase 4, core 2                    | 75025346  | 75030899  | - | NA        | 5  | 31  | 81  | -1.405081571 | 0.00011731 | 0.03210755 |
| ENSG00000124091 | GCNT7       | glucosaminyl (N-acetyl) transferase family member 7              | 56491492  | 56525925  | - | 140687    | 20 | 6   | 0   | 5.603454913  | 0.03361661 | 0.8324078  |
| ENSG00000225166 | AC012462.1  | NA                                                               | 215453707 | 215463871 | + | 102724849 | 2  | 0   | 8   | -6.033772917 | 0.00894141 | 0.44242407 |
| ENSG00000228192 | AL512353.1  | NA                                                               | 42834681  | 42846422  | - | NA        | 1  | 15  | 0   | 6.90746823   | 9.96E-05   | 0.02829695 |
| ENSG00000229474 | PATL2       | PAT1 homolog 2                                                   | 44665732  | 44711316  | - | 197135    | 15 | 23  | 8   | 1.486180555  | 0.01731168 | 0.5958645  |
| ENSG00000233818 | AP000695.2  | NA                                                               | 36445731  | 36532408  | + | NA        | 21 | 23  | 9   | 1.318704357  | 0.03063511 | 0.8324078  |
| ENSG00000279365 | AP000695.3  | NA                                                               | 36485867  | 36487760  | + | NA        | 21 | 0   | 12  | -6.611376502 | 0.00066721 | 0.09763777 |
| ENSG00000234773 | AC012618.3  | NA                                                               | 12195015  | 12237767  | + | NA        | 19 | 6   | 0   | 5.603454913  | 0.03361661 | 0.8324078  |
| ENSG00000188693 | CYP51A1-AS1 | NA                                                               | 92134604  | 92180725  | + | 613126    | 7  | 6   | 0   | 5.603454913  | 0.03361661 | 0.8324078  |
| ENSG00000237310 | GS1-124K5.4 | NA                                                               | 66493706  | 66495474  | + | 100289098 | 7  | 1   | 15  | -3.770634598 | 0.00079462 | 0.10718826 |
| ENSG00000253616 | AC107959.3  | NA                                                               | 23071377  | 23074488  | - | NA        | 8  | 22  | 8   | 1.422407463  | 0.02463569 | 0.74193929 |
| ENSG00000214357 | NEURL1B     | neuronal E3 ubiquitin protein ligase 1B                          | 172641266 | 172691540 | + | 54492     | 5  | 44  | 19  | 1.183171673  | 0.00749061 | 0.41981461 |
| ENSG00000269906 | AL606834.2  | NA                                                               | 50662511  | 50663178  | - | NA        | 14 | 28  | 12  | 1.190965615  | 0.02851606 | 0.80657876 |
| ENSG00000179044 | EXOC3L1     | exocyst complex component 3 like 1                               | 67184366  | 67190204  | - | 283849    | 16 | 6   | 26  | -2.115431616 | 0.00124544 | 0.14621903 |
| ENSG00000205436 | EXOC3L4     | exocyst complex component 3 like 4                               | 103100144 | 103110559 | + | 91828     | 14 | 6   | 0   | 5.603454913  | 0.03361661 | 0.8324078  |
| ENSG00000236098 | AC097059.2  | NA                                                               | 94318479  | 94324569  | - | NA        | 1  | 8   | 0   | 6.011054937  | 0.00894141 | 0.44242407 |
| ENSG00000156875 | MFS14A      | major facilitator superfamily domain containing 14A              | 100038097 | 100083377 | + | 64645     | 1  | 3   | 16  | -2.3898932   | 0.00639309 | 0.38046285 |
| ENSG00000241316 | SUCLG2-AS1  | NA                                                               | 67654697  | 67947713  | + | 101927111 | 3  | 7   | 24  | -1.782377813 | 0.00616054 | 0.37408912 |
| ENSG00000167912 | AC090152.1  | NA                                                               | 59119040  | 59121346  | + | NA        | 8  | 27  | 5   | 2.381260848  | 0.00031333 | 0.06121336 |
| ENSG00000129749 | CHRNA10     | cholinergic receptor nicotinic alpha 10 subunit                  | 3665587   | 3671384   | - | 57053     | 11 | 24  | 2   | 3.482659789  | 2.95E-05   | 0.01276152 |
| ENSG00000279288 | AC073346.2  | NA                                                               | 113075124 | 113077181 | - | NA        | 7  | 2   | 11  | -2.410535462 | 0.02678048 | 0.77212427 |
| ENSG00000242950 | ERVW-1      | endogenous retrovirus group W member 1, envelope                 | 92468380  | 92477986  | - | 30816     | 7  | 14  | 2   | 2.710424029  | 0.00572059 | 0.35537281 |
| ENSG00000126500 | FLRT1       | fibronectin leucine rich transmembrane protein 1                 | 64103188  | 64119173  | + | 23769     | 11 | 3   | 15  | -2.297523269 | 0.0103193  | 0.47399509 |
| ENSG00000263982 | AC009716.1  | NA                                                               | 76372717  | 76378275  | + | NA        | 18 | 20  | 7   | 1.47522798   | 0.0276789  | 0.78920399 |
| ENSG00000100867 | DHRS2       | dehydrogenase/reductase 2                                        | 23630115  | 23645639  | + | 10202     | 14 | 25  | 6   | 2.013561752  | 0.00188767 | 0.18640307 |
| ENSG00000273958 | AC009560.1  | NA                                                               | 60593027  | 60593460  | + | NA        | 15 | 0   | 6   | -5.626056987 | 0.03361661 | 0.8324078  |
| ENSG00000259287 | AC010809.1  | NA                                                               | 33858602  | 33864825  | - | NA        | 15 | 17  | 5   | 1.717772741  | 0.02315658 | 0.72522737 |
| ENSG00000261101 | AC234775.3  | NA                                                               | 101627868 | 101628523 | + | NA        | X  | 6   | 18  | -1.58795721  | 0.0310526  | 0.8324078  |
| ENSG00000133107 | TRPC4       | transient receptor potential cation channel subfamily C member 4 | 37636636  | 37870425  | - | 7223      | 13 | 66  | 21  | 1.623261607  | 4.93E-05   | 0.01913526 |
| ENSG00000284070 | AP000356.2  | NA                                                               | 24645171  | 24651657  | - | NA        | 22 | 0   | 6   | -5.626056987 | 0.03361661 | 0.8324078  |
| ENSG00000258303 | AC012464.2  | NA                                                               | 93836167  | 93838038  | + | NA        | 12 | 6   | 0   | 5.603454913  | 0.03361661 | 0.8324078  |
| ENSG00000273010 | AL360270.3  | NA                                                               | 110963302 | 110964649 | + | NA        | 1  | 6   | 0   | 5.603454913  | 0.03361661 | 0.8324078  |
| ENSG00000232811 | AL360270.1  | NA                                                               | 110943467 | 110952848 | + | NA        | 1  | 26  | 4   | 2.640296894  | 0.00016562 | 0.04097549 |
| ENSG00000506628 | PTGER3      | prostaglandin E receptor 3                                       | 70852353  | 71047808  | - | 5733      | 1  | 8   | 0   | 6.011054937  | 0.00894141 | 0.44242407 |
| ENSG00000243176 | AC092944.1  | NA                                                               | 157175223 | 157381265 | + | NA        | 3  | 5   | 16  | -1.676377416 | 0.03470407 | 0.84532906 |
| ENSG00000123444 | KBTBD4      | kelch repeat and BTB domain containing 4                         | 47572197  | 47579015  | - | 55709     | 11 | 34  | 84  | -1.324719096 | 0.00020792 | 0.04674538 |
| ENSG00000163376 | KBTBD8      | kelch repeat and BTB domain containing 8                         | 66998307  | 67011210  | + | 84541     | 3  | 267 | 111 | 1.242277019  | 2.12E-06   | 0.00196704 |
| ENSG00000271553 | AC018638.7  | NA                                                               | 128667043 | 128668156 | + | NA        | 7  | 3   | 14  | -2.198832243 | 0.01657597 | 0.5958645  |
| ENSG00000111199 | TRPV4       | transient receptor potential cation channel subfamily V member 4 | 109783085 | 109833401 | - | 59341     | 12 | 12  | 41  | -1.784949881 | 0.0004292  | 0.07427378 |
| ENSG00000261105 | LMO7-AS1    | NA                                                               | 75604700  | 75635994  | - | 101927155 | 13 | 35  | 75  | -1.119807552 | 0.00199822 | 0.19394578 |
| ENSG00000273186 | AL359091.4  | NA                                                               | 128431598 | 128432006 | + | NA        | 9  | 20  | 4   | 2.263871095  | 0.00268218 | 0.22748379 |
| ENSG00000174529 | TMEM81      | transmembrane protein 81                                         | 205083129 | 205084460 | - | 388730    | 1  | 31  | 13  | 1.222839677  | 0.01875381 | 0.62906886 |
| ENSG00000148057 | IDNK        | IDNK, gluconokinase                                              | 83623049  | 83644130  | + | 414328    | 9  | 46  | 15  | 1.585667436  | 0.00056074 | 0.08849285 |
| ENSG00000186976 | EFCAB6      | EF-hand calcium binding domain 6                                 | 43528744  | 43812337  | - | 64800     | 22 | 34  | 16  | 1.058588633  | 0.02990678 | 0.8324078  |
| ENSG00000034239 | EFCAB1      | EF-hand calcium binding domain 1                                 | 48710789  | 48735311  | - | 79645     | 8  | 3   | 16  | -2.3898932   | 0.00639309 | 0.38046285 |
| ENSG00000165071 | TMEM71      | transmembrane protein 71                                         | 132685007 | 132760712 | - | 137835    | 8  | 20  | 7   | 1.47522798   | 0.0276789  | 0.78920399 |
| ENSG00000277369 | AC010654.1  | NA                                                               | 11797468  | 11798275  | + | NA        | 16 | 1   | 9   | -3.041533225 | 0.02463495 | 0.74193929 |
| ENSG00000121900 | TMEM54      | transmembrane protein 54                                         | 32894594  | 32901438  | - | 113452    | 1  | 41  | 86  | -1.089437531 | 0.00161991 | 0.17090462 |
| ENSG00000265982 | AC103810.3  | NA                                                               | 64778842  | 64778937  | - | NA        | 17 | 4   | 20  | -2.309174503 | 0.00268218 | 0.22748379 |
| ENSG00000196932 | TMEM26      | transmembrane protein 26                                         | 61406643  | 61453450  | - | 219623    | 10 | 0   | 6   | -5.626056987 | 0.03361661 | 0.8324078  |
| ENSG00000240602 | AAADACP1    | NA                                                               | 151770428 | 151784894 | + | 201651    | 3  | 33  | 8   | 2.00462882   | 0.00040416 | 0.07164054 |
| ENSG00000132329 | RAMP1       | receptor activity modifying protein 1                            | 237858893 | 237912114 | + | 10267     | 2  | 0   | 27  | -7.773080664 | 7.04E-08   | 0.00012092 |
| ENSG00000274425 | AC114271.1  | NA                                                               | 10333436  | 10336248  | + | NA        | 19 | 1   | 8   | -2.874057027 | 0.04333145 | 0.95821355 |
| ENSG00000272892 | AL133551.1  | NA                                                               | 67849525  | 67850746  | + | NA        | 10 | 0   | 8   | -6.033772917 | 0.00894141 | 0.44242407 |
| ENSG00000227959 | AL451042.2  | NA                                                               | 16155211  | 16157329  | + | NA        | 1  | 0   | 12  | -6.611376502 | 0.00066721 | 0.09763777 |
| ENSG00000174500 | GCSAM       | germinal center associated signaling and motility sulfiredoxin 1 | 112120841 | 112133305 | - | 257144    | 3  | 33  | 9   | 1.837152622  | 0.00088348 | 0.11613368 |
| ENSG00000271303 | SRXN1       | sulfiredoxin 1                                                   | 646615    | 653370    | - | 140809    | 20 | 3   | 14  | -2.198832243 | 0.01657597 | 0.5958645  |
| ENSG00000140749 | IGSF6       | immunoglobulin superfamily member 6                              | 21639537  | 21652660  | - | 10261     | 16 | 24  | 9   | 1.379777349  | 0.02192    |            |

|                 |            |                                                     |           |           |   |           |    |     |     |              |            |            |
|-----------------|------------|-----------------------------------------------------|-----------|-----------|---|-----------|----|-----|-----|--------------|------------|------------|
| ENSG0000064692  | SNCAIP     | synuclein alpha interacting protein                 | 122311354 | 122464219 | + | 9627      | 5  | 29  | 11  | 1.365558911  | 0.01266414 | 0.54624477 |
| ENSG00000256674 | AC020549.1 | NA                                                  | 114583253 | 114584692 | + | NA        | 11 | 7   | 0   | 5.821602045  | 0.01729787 | 0.5958645  |
| ENSG00000253667 | AC100821.1 | NA                                                  | 53971231  | 53974210  | + | NA        | 8  | 6   | 0   | 5.603454913  | 0.03361661 | 0.8324078  |
| ENSG00000234477 | AC004231.1 | NA                                                  | 40921430  | 40975926  | + | NA        | 17 | 6   | 0   | 5.603454913  | 0.03361661 | 0.8324078  |
| ENSG00000112299 | VNN1       | vanin 1                                             | 132681590 | 132714049 | - | 8876      | 6  | 73  | 28  | 1.355509676  | 0.0003331  | 0.06443635 |
| ENSG00000232818 | RPS2P32    | NA                                                  | 23490473  | 23491364  | + | 256355    | 7  | 12  | 2   | 2.490174747  | 0.01608407 | 0.5958645  |
| ENSG00000232499 | AL391058.1 | NA                                                  | 11344970  | 113450728 | + | NA        | 1  | 12  | 31  | -1.382996774 | 0.01141827 | 0.51219505 |
| ENSG00000166432 | ZMAT1      | zinc finger matrin-type 1                           | 101882288 | 101932031 | - | 84460     | X  | 24  | 9   | 1.379777349  | 0.02192594 | 0.70005671 |
| ENSG00000138207 | RBP4       | retinol binding protein 4                           | 93591687  | 93601744  | - | 5950      | 10 | 4   | 16  | -1.989467105 | 0.0161862  | 0.5958645  |
| ENSG00000114115 | RBP1       | retinol binding protein 1                           | 139517434 | 139539829 | - | 5947      | 3  | 14  | 31  | -1.162747492 | 0.02943072 | 0.82585301 |
| ENSG00000231393 | AL357874.2 | NA                                                  | 35642514  | 35643517  | + | NA        | 9  | 0   | 6   | -5.626056987 | 0.03361661 | 0.8324078  |
| ENSG00000183066 | WBP2NL     | WBP2 N-terminal like                                | 41998725  | 42058456  | + | 164684    | 22 | 2   | 12  | -2.534725564 | 0.01608407 | 0.5958645  |
| ENSG00000227456 | LINC00310  | NA                                                  | 34157724  | 34190244  | + | 114036    | 21 | 1   | 8   | -2.874057027 | 0.04333145 | 0.95821355 |
| ENSG00000180422 | LINC00304  | NA                                                  | 89159146  | 89164245  | + | 283860    | 16 | 48  | 19  | 1.308359219  | 0.00257631 | 0.22216267 |
| ENSG00000259318 | AL356801.1 | NA                                                  | 55394940  | 55395233  | - | NA        | 14 | 23  | 4   | 2.464326383  | 0.00067212 | 0.09763777 |
| ENSG00000233858 | AC026904.1 | NA                                                  | 48590401  | 48594621  | + | NA        | 8  | 2   | 11  | -2.410535462 | 0.02678048 | 0.77212427 |
| ENSG00000232977 | LINC00327  | NA                                                  | 23466571  | 23487464  | + | 100506697 | 13 | 24  | 59  | -1.316228115 | 0.00139668 | 0.15453355 |
| ENSG00000178977 | LINC00324  | NA                                                  | 8220642   | 8224043   | - | 284029    | 17 | 0   | 6   | -5.626056987 | 0.03361661 | 0.8324078  |
| ENSG00000255874 | LINC00346  | NA                                                  | 110863987 | 110870251 | - | 283487    | 13 | 16  | 3   | 2.344849074  | 0.00639309 | 0.38046285 |
| ENSG00000255836 | AC131206.1 | NA                                                  | 7438780   | 7439990   | - | NA        | 12 | 70  | 28  | 1.295074666  | 0.0006773  | 0.09813928 |
| ENSG00000258284 | POLR2KP1   | NA                                                  | 49594091  | 49594258  | + | NA        | 12 | 0   | 6   | -5.626056987 | 0.03361661 | 0.8324078  |
| ENSG00000152128 | TMEM163    | transmembrane protein 163                           | 134455759 | 134719000 | - | 81615     | 2  | 7   | 0   | 5.821602045  | 0.01729787 | 0.5958645  |
| ENSG00000164112 | TMEM155    | transmembrane protein 155                           | 121758933 | 121765427 | - | 132332    | 4  | 0   | 8   | -6.033772917 | 0.00894141 | 0.44242407 |
| ENSG00000198711 | SSBP3-AS1  | NA                                                  | 54236440  | 54239063  | + | 619518    | 1  | 25  | 5   | 2.270765538  | 0.00075899 | 0.10617391 |
| ENSG00000280143 | AP000892.3 | NA                                                  | 117204967 | 117210292 | + | NA        | 11 | 4   | 16  | -1.989467105 | 0.0161862  | 0.5958645  |
| ENSG00000277142 | LINC00235  | NA                                                  | 525155    | 527407    | - | NA        | 16 | 24  | 8   | 1.547253547  | 0.01209816 | 0.53423305 |
| ENSG00000254363 | AC011379.2 | NA                                                  | 140157319 | 140173051 | + | 101929719 | 5  | 1   | 14  | -3.671943573 | 0.00141036 | 0.15453355 |
| ENSG00000221540 | MIR1180    | NA                                                  | 19344506  | 19344574  | - | 100302256 | 17 | 0   | 8   | -6.033772917 | 0.00894141 | 0.44242407 |
| ENSG00000254612 | AP001000.1 | NA                                                  | 127940913 | 127941654 | - | NA        | 11 | 82  | 36  | 1.161808415  | 0.00101686 | 0.12917106 |
| ENSG00000224939 | LINC00184  | NA                                                  | 234629311 | 234634780 | + | 100302691 | 1  | 20  | 7   | 1.47522798   | 0.0276789  | 0.78920399 |
| ENSG00000240038 | AMY2B      | amylase, alpha 2B (pancreatic)                      | 103553815 | 103579534 | + | 280       | 1  | 29  | 62  | -1.115916114 | 0.00483422 | 0.3155329  |
| ENSG00000166448 | TMEM130    | transmembrane protein 130                           | 98846488  | 98870771  | - | 222865    | 7  | 2   | 11  | -2.410535462 | 0.02678048 | 0.77212427 |
| ENSG00000183160 | TMEM119    | transmembrane protein 119                           | 108589846 | 108598320 | - | 338773    | 12 | 190 | 494 | -1.400990239 | 5.05E-09   | 1.21E-05   |
| ENSG00000196361 | ELAVL3     | ELAV like RNA binding protein 3                     | 11451326  | 11481046  | - | 1995      | 19 | 6   | 0   | 5.603454913  | 0.03361661 | 0.8324078  |
| ENSG00000181284 | TMEM102    | transmembrane protein 102                           | 7435443   | 7437679   | + | 284114    | 17 | 14  | 40  | -1.529185439 | 0.00203931 | 0.19615799 |
| ENSG00000144868 | TMEM108    | transmembrane protein 108                           | 133038391 | 133397792 | + | 66000     | 3  | 32  | 15  | 1.063828603  | 0.03399614 | 0.83595983 |
| ENSG00000271580 | AL583832.1 | NA                                                  | 205091163 | 205091946 | + | NA        | 1  | 1   | 10  | -3.191574278 | 0.01395124 | 0.57317426 |
| ENSG00000276337 | AC105429.1 | NA                                                  | 87470370  | 87474370  | - | NA        | 16 | 7   | 0   | 5.821602045  | 0.01729787 | 0.5958645  |
| ENSG00000267121 | AC008105.3 | NA                                                  | 45190931  | 45222222  | - | 339192    | 17 | 9   | 1   | 2.998267012  | 0.02463495 | 0.74193929 |
| ENSG00000261360 | AC010491.1 | NA                                                  | 14661808  | 14664604  | - | NA        | 5  | 24  | 4   | 2.525399375  | 0.00042196 | 0.07378461 |
| ENSG00000243368 | MCCC1-AS1  | NA                                                  | 183016255 | 183017808 | + | NA        | 3  | 0   | 11  | -6.4871864   | 0.00126829 | 0.14621903 |
| ENSG00000137463 | MGARP      | mitochondria localized glutamic acid rich protein   | 139266163 | 139280338 | - | 84709     | 4  | 12  | 27  | -1.184539242 | 0.03830181 | 0.90546426 |
| ENSG00000064547 | LPAR2      | lysophosphatidic acid receptor 2                    | 19623668  | 19628930  | - | 9170      | 19 | 17  | 4   | 2.030998852  | 0.01039936 | 0.47399509 |
| ENSG00000115008 | IL1A       | interleukin 1 alpha                                 | 112773915 | 112784590 | - | 3552      | 2  | 87  | 30  | 1.50911699   | 2.92E-05   | 0.01270536 |
| ENSG00000125538 | IL1B       | interleukin 1 beta                                  | 112829751 | 112836903 | - | 3553      | 2  | 194 | 38  | 2.325148994  | 8.64E-14   | 8.15E-10   |
| ENSG00000139890 | REM2       | RRAD and GEM like GTPase 2                          | 22883165  | 22887686  | + | 161253    | 14 | 6   | 0   | 5.603454913  | 0.03361661 | 0.8324078  |
| ENSG00000205544 | TMEM256    | transmembrane protein 256                           | 7402975   | 7404137   | - | 254863    | 17 | 5   | 25  | -2.316233887 | 0.00075899 | 0.10617391 |
| ENSG00000259984 | AL928711.1 | NA                                                  | 25336429  | 25337465  | - | NA        | 1  | 15  | 0   | 6.90746823   | 9.96E-05   | 0.02829695 |
| ENSG00000227344 | HAAUSP1    | NA                                                  | 53187388  | 53188938  | + | NA        | 7  | 6   | 0   | 5.603454913  | 0.03361661 | 0.8324078  |
| ENSG00000241764 | AC002467.1 | NA                                                  | 107742817 | 107744581 | - | 101927974 | 7  | 13  | 2   | 2.604498362  | 0.00961124 | 0.45874658 |
| ENSG00000189376 | Cborf76    | chromosome 8 open reading frame 76                  | 123219957 | 123241398 | - | 84933     | 8  | 16  | 4   | 1.944199246  | 0.0161862  | 0.5958645  |
| ENSG00000205978 | NYNRIN     | NYN domain and retroviral integrase containing      | 24398786  | 24419288  | + | 57523     | 14 | 206 | 409 | -1.012084623 | 2.46E-05   | 0.01141042 |
| ENSG00000275198 | AL512791.2 | NA                                                  | 90383365  | 90387973  | + | NA        | 14 | 3   | 12  | -1.978549282 | 0.04197539 | 0.95430001 |
| ENSG00000165821 | SALL2      | spalt like transcription factor 2                   | 21521081  | 21537216  | - | 6297      | 14 | 42  | 108 | -1.382976913 | 3.18E-05   | 0.0134579  |
| ENSG00000187510 | PLEKHG7    | pleckstrin homology and RhoGEF domain containing G7 | 92721462  | 92772455  | + | 440107    | 12 | 8   | 0   | 6.011054937  | 0.00894141 | 0.44242407 |
| ENSG00000240338 | AC009078.2 | NA                                                  | 75226074  | 75228197  | + | 100506281 | 16 | 56  | 17  | 1.689576513  | 8.63E-05   | 0.02652668 |
| ENSG00000253270 | AC090541.1 | NA                                                  | 19678572  | 19688934  | + | NA        | 8  | 13  | 2   | 2.604498362  | 0.00961124 | 0.45874658 |
| ENSG00000263786 | AC022211.1 | NA                                                  | 75145261  | 75146546  | - | NA        | 17 | 7   | 0   | 5.821602045  | 0.01729787 | 0.5958645  |
| ENSG00000273901 | AC012313.9 | NA                                                  | 58500505  | 58501137  | + | NA        | 19 | 6   | 0   | 5.603454913  | 0.03361661 | 0.8324078  |
| ENSG00000268543 | AC012313.4 | NA                                                  | 58418560  | 58419310  | + | NA        | 19 | 15  | 3   | 2.252490968  | 0.0103193  | 0.47399509 |
| ENSG00000182107 | TMEM30B    | transmembrane protein 30B                           | 61277370  | 61281840  | - | 161291    | 14 | 7   | 23  | -1.721299651 | 0.00903825 | 0.44449827 |
| ENSG00000224855 | OPA1-AS1   | NA                                                  | 193618609 | 193627337 | - | 100873941 | 3  | 6   | 0   | 5.603454913  | 0.03361661 | 0.8324078  |
| ENSG00000117594 | HSD11B1    | hydroxysteroid 11-beta dehydrogenase 1              | 209686178 | 209734950 | + | 3290      | 1  | 53  | 26  | 1.000969301  | 0.01230527 | 0.53917642 |
| ENSG00000176387 | HSD11B2    | hydroxysteroid 11-beta dehydrogenase 2              | 67430652  | 67437553  | + | 3291      | 16 | 11  | 0   | 6.464372701  | 0.00126829 | 0.14621903 |
| ENSG00000102760 | RGCC       | regulator of cell cycle                             | 41457559  | 41470882  | + | 28984     | 13 | 149 | 298 | -1.022453656 | 5.26E-05   | 0.0193511  |
| ENSG00000257337 | AC068888.1 | NA                                                  | 53014596  | 53054438  | - | 283335    | 12 | 37  | 16  | 1.180147198  | 0.0133442  | 0.56335009 |
| ENSG00000273173 | SNURF      | SNRPN upstream reading frame                        | 24954986  | 24977850  | + | 8926      | 15 | 16  | 5   | 1.630973135  | 0.03470407 | 0.84532906 |
| ENSG00000256084 | AC092112.1 | NA                                                  | 14216590  | 14221297  | + | NA        | 12 | 0   | 7   | -5.844270205 | 0.01729787 | 0.5958645  |
| ENSG00000167397 | VKORC1     | vitamin K epoxide reductase complex subunit 1       | 31090842  | 31095980  | - | 79001     | 16 | 12  | 30  | -1.33588264  | 0.01556371 | 0.5958645  |
| ENSG00000143850 | PLEKHA6    | pleckstrin homology domain containing A6            | 204218851 | 204377665 | - | 22874     | 1  | 38  | 91  | -1.280128864 | 0.0002196  | 0.04859947 |
| ENSG00000116741 | RGS2       | regulator of G protein signaling 2                  | 192809039 | 192812283 | + | 5997      | 1  | 90  | 34  | 1.378083626  | 8.65E-05   | 0.02652668 |
| ENSG00000256591 | AP003108.2 | novel transcript                                    | 61429220  | 61485822  | + | NA        | 11 | 4   | 14  | -1.798406149 | 0.03847433 | 0.90546426 |
| ENSG00000160325 | CACFD1     | calcium channel flower domain containing 1          | 133459965 | 133470848 | + | 11094     | 9  | 73  | 159 | -1.144768047 | 7.23E-05   | 0.0239478  |
| ENSG00000151715 | TMEM45B    | transmembrane protein 45B                           | 129815819 | 129860003 | + | 120224    | 11 | 2   | 13  | -2.649067302 | 0.00961124 | 0.45874658 |
| ENSG00000261879 | AC087500.1 | NA                                                  | 5192084   | 5248069   | + | NA        | 17 | 4   | 16  | -1.989467105 | 0.0161862  | 0.5958645  |
| ENSG00000254418 | SPON1-AS1  | NA                                                  | 14262846  | 1427      |   |           |    |     |     |              |            |            |



|                 |             |                                                                  |           |           |   |           |    |     |     |              |            |            |
|-----------------|-------------|------------------------------------------------------------------|-----------|-----------|---|-----------|----|-----|-----|--------------|------------|------------|
| ENSG00000225507 | AC069282.1  | NA                                                               | 47956793  | 47957318  | + | NA        | 7  | 17  | 40  | -1.251350202 | 0.00913405 | 0.44611156 |
| ENSG00000123453 | SARDH       | sarcosine dehydrogenase                                          | 133663560 | 133739955 | - | 1757      | 9  | 74  | 31  | 1.228879207  | 0.00089935 | 0.11726934 |
| ENSG00000166492 | FAM86GP     | NA                                                               | 3410352   | 3422496   | - | NA        | 11 | 13  | 0   | 6.702865037  | 0.00035249 | 0.06443635 |
| ENSG00000205790 | DPP9-AS1    | NA                                                               | 4679282   | 4685948   | + | NA        | 19 | 13  | 2   | 2.604498362  | 0.00961124 | 0.45874658 |
| ENSG00000268499 | AC011479.2  | NA                                                               | 38199836  | 38200934  | + | NA        | 19 | 9   | 0   | 6.178492236  | 0.00464266 | 0.30691904 |
| ENSG00000078401 | EDN1        | endothelin 1                                                     | 12290363  | 12297194  | + | 1906      | 6  | 855 | 384 | 1.131491963  | 4.71E-07   | 0.00060606 |
| ENSG00000167992 | VWCE        | von Willebrand factor C and EGF domains                          | 61258286  | 61295424  | - | 220001    | 11 | 18  | 36  | -1.017970056 | 0.03848483 | 0.90546426 |
| ENSG00000227374 | AL157832.1  | NA                                                               | 129768844 | 129769435 | + | NA        | 10 | 0   | 9   | -6.201249115 | 0.00464266 | 0.30691904 |
| ENSG00000179046 | TRIML2      | tripartite motif family like 2                                   | 188091273 | 188109603 | - | 205860    | 4  | 17  | 1   | 3.906400717  | 0.00025279 | 0.0532408  |
| ENSG00000264107 | AC138207.2  | NA                                                               | 31090787  | 31095450  | - | NA        | 17 | 2   | 18  | -3.114761185 | 0.00070095 | 0.10003166 |
| ENSG00000269386 | RAB11B-AS1  | NA                                                               | 8374373   | 8390685   | - | 100507567 | 19 | 3   | 15  | -2.297523269 | 0.0103193  | 0.47399509 |
| ENSG00000233602 | ERI3-IT1    | NA                                                               | 44243408  | 44244273  | - | 100874278 | 1  | 0   | 8   | -6.033772917 | 0.00894141 | 0.44242407 |
| ENSG00000189367 | KIAA0408    | KIAA0408                                                         | 127440343 | 127459391 | - | 9729      | 6  | 12  | 3   | 1.93356416   | 0.04197539 | 0.95430001 |
| ENSG00000166546 | BEAN1       | brain expressed associated with NEDD4 1                          | 66427297  | 66493529  | + | 146227    | 16 | 20  | 2   | 3.22113151   | 0.00024375 | 0.05305877 |
| ENSG00000104415 | WISP1       | WNT1 inducible signaling pathway protein 1                       | 133191039 | 133230344 | + | 8840      | 8  | 336 | 670 | -1.018498878 | 7.60E-06   | 0.00481643 |
| ENSG00000268873 | AC022601.1  | NA                                                               | 34737795  | 34767663  | - | NA        | 18 | 8   | 1   | 2.830829713  | 0.04333145 | 0.95821355 |
| ENSG00000255337 | AP001830.1  | NA                                                               | 102452919 | 102462008 | + | 101928424 | 11 | 0   | 6   | -5.626056987 | 0.03361661 | 0.8324078  |
| ENSG00000233885 | YEATS2-AS1  | NA                                                               | 183806457 | 183810783 | - | NA        | 3  | 12  | 33  | -1.472846189 | 0.00607118 | 0.37185167 |
| ENSG00000254909 | AP003392.2  | NA                                                               | 119005727 | 119005934 | - | NA        | 11 | 6   | 20  | -1.738972905 | 0.01430617 | 0.58310523 |
| ENSG00000255121 | AP003392.4  | NA                                                               | 118994824 | 118998004 | - | NA        | 11 | 27  | 11  | 1.262927649  | 0.02384497 | 0.73821694 |
| ENSG00000260339 | HEXA-AS1    | NA                                                               | 72376113  | 72378788  | + | 80072     | 15 | 0   | 7   | -5.844270205 | 0.01729787 | 0.5958645  |
| ENSG00000258130 | AC106782.1  | NA                                                               | 30204316  | 30209071  | - | 613038    | 16 | 2   | 15  | -2.85369955  | 0.00339444 | 0.27265605 |
| ENSG00000157578 | LCA5L       | LCA5L, lebercilin like                                           | 39405844  | 39445805  | - | 150082    | 21 | 52  | 21  | 1.280047125  | 0.00222023 | 0.20964481 |
| ENSG00000266124 | MIR5587     | NA                                                               | 535316    | 535368    | + | 100847028 | 16 | 7   | 0   | 5.821602045  | 0.01729787 | 0.5958645  |
| ENSG00000267776 | AC006116.10 | NA                                                               | 56376704  | 56377284  | - | NA        | 19 | 9   | 1   | 2.998267012  | 0.02463495 | 0.74193929 |
| ENSG00000237410 | AP001092.1  | NA                                                               | 64646399  | 64659681  | + | NA        | 11 | 0   | 6   | -5.626056987 | 0.03361661 | 0.8324078  |
| ENSG00000235033 | AL590999.1  | NA                                                               | 39881804  | 39900071  | - | 100505635 | 6  | 12  | 36  | -1.597926937 | 0.0022933  | 0.21443156 |
| ENSG00000231064 | AC234582.1  | NA                                                               | 155195004 | 155205495 | + | NA        | 1  | 4   | 18  | -2.158158808 | 0.00664724 | 0.38704964 |
| ENSG00000161265 | U2AF1L4     | U2 small nuclear RNA auxiliary factor 1 like 4                   | 35742464  | 35745445  | - | 199746    | 19 | 0   | 7   | -5.844270205 | 0.01729787 | 0.5958645  |
| ENSG00000129009 | ISLR        | immunoglobulin superfamily containing leucine rich repeat        | 74173671  | 74176872  | + | 3671      | 15 | 40  | 12  | 1.703598578  | 0.00060271 | 0.09279021 |
| ENSG00000186529 | CYP4F3      | cytochrome P450 family 4 subfamily F member 3                    | 15640897  | 15662825  | + | 4051      | 19 | 14  | 3   | 2.153813442  | 0.01657597 | 0.5958645  |
| ENSG00000251127 | AC091173.1  | NA                                                               | 61759094  | 61765969  | - | NA        | 8  | 38  | 6   | 2.615155924  | 7.46E-06   | 0.00480171 |
| ENSG00000228049 | POLR2J2     | RNA polymerase II subunit J2                                     | 102665368 | 102671629 | - | NA        | 7  | 14  | 0   | 6.808790704  | 0.000187   | 0.04333935 |
| ENSG00000187942 | LDLRAD2     | low density lipoprotein receptor class A domain containing 2     | 21812265  | 21825221  | + | 401944    | 1  | 6   | 0   | 5.603454913  | 0.03361661 | 0.8324078  |
| ENSG00000274419 | TBC1D3D     | TBC1 domain family member 3D                                     | 38003976  | 38014902  | + | 101060389 | 17 | 15  | 42  | -1.500684914 | 0.00191784 | 0.18831051 |
| ENSG00000162482 | AKR7A3      | aldo-keto reductase family 7 member A3                           | 19282558  | 19289250  | - | 22977     | 1  | 11  | 2   | 2.366006025  | 0.02678048 | 0.77212427 |
| ENSG00000260669 | AL096870.2  | NA                                                               | 24209646  | 24215987  | - | NA        | 14 | 7   | 0   | 5.821602045  | 0.01729787 | 0.5958645  |
| ENSG00000204959 | ARHGEF34P   | NA                                                               | 144272445 | 144286966 | - | NA        | 7  | 19  | 39  | -1.055591689 | 0.02660856 | 0.77212427 |
| ENSG00000280046 | AC104581.4  | NA                                                               | 7858943   | 7866083   | + | NA        | 17 | 34  | 16  | 1.058588633  | 0.02990678 | 0.8324078  |
| ENSG00000261732 | AL031708.1  | novel transcript                                                 | 1632259   | 1686715   | + | NA        | 16 | 3   | 12  | -1.978549282 | 0.04197539 | 0.95430001 |
| ENSG00000221539 | SNORD99     | NA                                                               | 28578749  | 28578822  | - | 692212    | 1  | 6   | 0   | 5.603454913  | 0.03361661 | 0.8324078  |
| ENSG00000221740 | SNORD93     | NA                                                               | 22856613  | 22856686  | + | 692210    | 7  | 0   | 7   | -5.844270205 | 0.01729787 | 0.5958645  |
| ENSG00000274751 | AC120498.9  | NA                                                               | 1305547   | 1309413   | - | NA        | 16 | 6   | 0   | 5.603454913  | 0.03361661 | 0.8324078  |
| ENSG00000259349 | AC011921.1  | NA                                                               | 60526293  | 60550798  | + | NA        | 17 | 0   | 6   | -5.626056987 | 0.03361661 | 0.8324078  |
| ENSG00000234377 | RNF219-AS1  | NA                                                               | 77919689  | 78617328  | + | 100874222 | 13 | 0   | 6   | -5.626056987 | 0.03361661 | 0.8324078  |
| ENSG00000269940 | AL049840.3  | NA                                                               | 103694560 | 103695170 | + | NA        | 14 | 3   | 15  | -2.297523269 | 0.0103193  | 0.47399509 |
| ENSG00000225790 | AC007953.1  | NA                                                               | 177934823 | 177937662 | + | NA        | 3  | 3   | 17  | -2.47670325  | 0.00394482 | 0.29823018 |
| ENSG00000267040 | AC027097.1  | NA                                                               | 57630302  | 57669296  | + | NA        | 18 | 3   | 12  | -1.978549282 | 0.04197539 | 0.95430001 |
| ENSG00000073067 | CYP2W1      | cytochrome P450 family 2 subfamily W member 1                    | 983199    | 989640    | + | 54905     | 7  | 8   | 0   | 6.011054937  | 0.00894141 | 0.44242407 |
| ENSG00000278989 | AP001148.1  | NA                                                               | 86434924  | 86437282  | - | NA        | 11 | 8   | 24  | -1.59292492  | 0.01209816 | 0.53423305 |
| ENSG00000128262 | POM121L9P   | NA                                                               | 24251828  | 24265525  | + | 29774     | 22 | 149 | 340 | -1.212601944 | 1.24E-06   | 0.001307   |
| ENSG00000265437 | AP005212.2  | NA                                                               | 14361434  | 14361943  | - | NA        | 18 | 6   | 0   | 5.603454913  | 0.03361661 | 0.8324078  |
| ENSG00000226049 | TLK2P1      | NA                                                               | 34036681  | 34039872  | - | NA        | 17 | 40  | 17  | 1.205444611  | 0.00913405 | 0.44611156 |
| ENSG00000149489 | ROM1        | retinal outer segment membrane protein 1                         | 62611722  | 62615120  | + | 6094      | 11 | 16  | 39  | -1.301738249 | 0.00764597 | 0.42552295 |
| ENSG00000166634 | SERPINB12   | serpin family B member 12                                        | 63556160  | 63567011  | + | 89777     | 18 | 0   | 6   | -5.626056987 | 0.03361661 | 0.8324078  |
| ENSG00000198963 | RORB        | RAR related orphan receptor B                                    | 74491365  | 74693177  | + | 6096      | 9  | 14  | 14  | -3.671943573 | 0.00141036 | 0.15455355 |
| ENSG00000047936 | ROS1        | ROS proto-oncogene 1, receptor tyrosine kinase                   | 117288300 | 117425855 | - | 6098      | 6  | 23  | 4   | 2.464326383  | 0.00067212 | 0.09763777 |
| ENSG00000023445 | BIRC3       | baculoviral IAP repeat containing 3                              | 102317450 | 102339403 | + | 330       | 11 | 515 | 253 | 1.002008112  | 1.82E-05   | 0.00875043 |
| ENSG00000239280 | AC108693.1  | NA                                                               | 113740823 | 113741254 | - | NA        | 3  | 8   | 0   | 6.011054937  | 0.00894141 | 0.44242407 |
| ENSG00000261342 | AC006538.1  | NA                                                               | 2727743   | 2729327   | - | NA        | 19 | 12  | 3   | 1.93356416   | 0.04197539 | 0.95430001 |
| ENSG00000080007 | DDX43       | DEAD-box helicase 43                                             | 73394748  | 73417569  | + | 55510     | 6  | 2   | 14  | -2.755008525 | 0.00572059 | 0.35537281 |
| ENSG00000227954 | TARID       | NA                                                               | 133502252 | 133892802 | - | 100507308 | 6  | 66  | 28  | 1.210342861  | 0.00136121 | 0.15301506 |
| ENSG00000135917 | SLC19A3     | solute carrier family 19 member 3                                | 227685210 | 227718012 | - | 80704     | 2  | 15  | 3   | 2.252490968  | 0.0103193  | 0.47399509 |
| ENSG00000259891 | AC107375.1  | NA                                                               | 140505813 | 140508043 | - | NA        | 8  | 14  | 41  | -1.5647006   | 0.00149235 | 0.15991045 |
| ENSG00000231993 | EP300-AS1   | NA                                                               | 41174591  | 41197456  | - | NA        | 22 | 2   | 13  | -2.649067302 | 0.00961124 | 0.45874658 |
| ENSG00000263327 | TAP1-AS1    | NA                                                               | 16226685  | 16320140  | + | 202020    | 4  | 9   | 22  | -1.300630732 | 0.04253884 | 0.95821355 |
| ENSG00000240093 | AC093627.3  | NA                                                               | 182935    | 194180    | - | NA        | 7  | 26  | 7   | 1.851653778  | 0.00282728 | 0.23551614 |
| ENSG00000163815 | CLEC3B      | C-type lectin domain family 3 member B                           | 45001548  | 45036071  | + | 7123      | 3  | 1   | 13  | -3.56600235  | 0.00250381 | 0.21723364 |
| ENSG00000272084 | AL137127.1  | NA                                                               | 19072110  | 19075511  | - | NA        | 1  | 22  | 3   | 2.801203118  | 0.00033955 | 0.06443635 |
| ENSG00000258900 | HNRNP112    | NA                                                               | 58521223  | 58521988  | + | NA        | 14 | 21  | 7   | 1.545187146  | 0.01916925 | 0.63844355 |
| ENSG00000206712 | RNU6-26P    | NA                                                               | 98804978  | 98805084  | - | NA        | 3  | 82  | 40  | 1.010300631  | 0.00365246 | 0.28542107 |
| ENSG00000205670 | SMIM11A     | small integral membrane protein 11A                              | 34375480  | 34407866  | + | 54065     | 21 | 34  | 8   | 2.047536136  | 0.00027344 | 0.05612867 |
| ENSG00000186377 | CYP4X1      | cytochrome P450 family 4 subfamily X member 1                    | 47023568  | 47050751  | + | 260293    | 1  | 2   | 11  | -2.410535462 | 0.02678048 | 0.77212427 |
| ENSG00000278918 | AC080112.3  | NA                                                               | 40348049  | 40350539  | - | NA        | 17 | 0   | 10  | -6.351290168 | 0.00242129 | 0.21443156 |
| ENSG00000183977 | PP2D1       | protein phosphatase 2C like domain containing 1                  | 19979961  | 20012330  | - | 151649    | 3  | 24  | 8   | 1.547253547  | 0.01209816 | 0.53423305 |
| ENSG00000233025 | CRYZP1      | NA                                                               | 103088664 | 103089610 | - | NA        | 7  | 14  | 3   | 2.153813442  | 0.01657597 | 0.5958645  |
| ENSG00000230565 | ZNF32-AS2   | NA                                                               | 43645942  | 43648019  | + | 414208    | 10 | 23  | 5   | 2.151100271  | 0.00182283 | 0.18408612 |
| ENSG00000102057 | KCND1       | potassium voltage-gated channel subfamily D member 1             | 48961378  | 48971569  | - | 3750      | X  | 42  | 108 | -1.382976913 | 3.18E-05   | 0.0134579  |
| ENSG00000178342 | KCNG2       | potassium voltage-gated channel modifier subfamily G member 2    | 79863668  | 79900184  | + | 26251     | 18 | 39  | 15  | 1.34821487   | 0.00470459 | 0.31023948 |
| ENSG00000175538 | KCNE3       | potassium voltage-gated channel subfamily E regulatory subunit 3 | 74454841  | 74467729  | - | 10008     | 11 | 0   | 7   | -5.844270205 | 0.01729787 | 0.5958645  |
| ENSG00000049249 | TNFRSF9     | TNF receptor superfamily member 9                                | 7915894   | 7943165   | - | 3604      | 1  | 8   | 0   | 6.011054937  | 0.00894141 | 0.44242407 |
| ENSG00000185760 | KCNQ5       | potassium voltage-gated channel subfamily Q member 5             | 72621792  | 73198851  | + | 56479     | 6  | 51  | 23  | 1.121593197  | 0.00657299 | 0.38704964 |
| ENSG00000262663 | AC087222.1  | NA                                                               | 82918282  | 82918785  | + | NA        | 17 | 10  | 2   | 2.230135398  | 0.04430615 | 0.96117306 |
| ENSG00000198286 | CARD11      | caspase                                                          |           |           |   |           |    |     |     |              |            |            |

|                 |              |                                                          |           |           |   |           |    |     |     |              |            |            |
|-----------------|--------------|----------------------------------------------------------|-----------|-----------|---|-----------|----|-----|-----|--------------|------------|------------|
| ENSG00000233626 | AC092814.1   | NA                                                       | 211936249 | 211936634 | + | NA        | 1  | 9   | 0   | 6.178492236  | 0.00464266 | 0.30691904 |
| ENSG00000255866 | AC090023.1   | NA                                                       | 65559591  | 65560889  | + | NA        | 12 | 4   | 17  | -2.07627155  | 0.01039936 | 0.47399509 |
| ENSG00000272277 | AL031963.3   | NA                                                       | 3068045   | 3068894   | - | NA        | 6  | 0   | 10  | -6.351290168 | 0.00242129 | 0.21443156 |
| ENSG00000249740 | OSMR-AS1     | NA                                                       | 38710367  | 38845829  | - | 101926904 | 5  | 31  | 15  | 1.018207428  | 0.04433348 | 0.96117306 |
| ENSG00000255561 | FDXACB1      | ferredoxin-fold anticodon binding domain containing 1    | 111874056 | 111881243 | - | 91893     | 11 | 19  | 7   | 1.401702691  | 0.03970312 | 0.92328994 |
| ENSG00000132938 | MTUS2        | microtubule associated scaffold protein 2                | 28820348  | 29505947  | + | 23281     | 13 | 0   | 8   | -6.033772917 | 0.00894141 | 0.44242407 |
| ENSG00000214796 | AC098934.1   | NA                                                       | 202851828 | 202861620 | - | NA        | 1  | 11  | 2   | 2.366006025  | 0.02678048 | 0.77212427 |
| ENSG00000240395 | RPL5P23      | NA                                                       | 42341767  | 42342634  | - | NA        | 8  | 7   | 0   | 5.821602045  | 0.01729787 | 0.5958645  |
| ENSG00000255282 | WTAPP1       | NA                                                       | 102746968 | 102836766 | + | 100288077 | 11 | 22  | 9   | 1.254931265  | 0.04253884 | 0.95821355 |
| ENSG00000213707 | HMGB1P10     | NA                                                       | 26560526  | 26561088  | + | NA        | 22 | 14  | 30  | -1.115633358 | 0.03879354 | 0.90953385 |
| ENSG00000244668 | SNRPP3       | NA                                                       | 150719997 | 150720836 | - | NA        | 3  | 0   | 12  | -6.611376502 | 0.00066721 | 0.09763777 |
| ENSG00000270344 | POC1B-AS1    | NA                                                       | 89525654  | 89548005  | + | NA        | 12 | 23  | 6   | 1.893896485  | 0.00429585 | 0.30691904 |
| ENSG00000284052 | AC006460.2   | NA                                                       | 190607660 | 190649840 | - | NA        | 2  | 46  | 12  | 1.904641422  | 7.67E-05   | 0.02458115 |
| ENSG00000230519 | HMGB1P49     | NA                                                       | 27702338  | 27702906  | + | NA        | 12 | 2   | 10  | -2.27463923  | 0.04430615 | 0.96117306 |
| ENSG00000235587 | GAPDHP65     | NA                                                       | 46439709  | 46440714  | - | NA        | X  | 4   | 17  | -2.07627155  | 0.01039936 | 0.47399509 |
| ENSG00000014257 | ACPP         | acid phosphatase, prostate                               | 132317367 | 132368298 | + | 55        | 3  | 10  | 2   | 2.230135398  | 0.04430615 | 0.96117306 |
| ENSG00000237943 | PRKCO-AS1    | NA                                                       | 6580419   | 6616452   | + | NA        | 10 | 13  | 3   | 2.047887775  | 0.0264707  | 0.77212427 |
| ENSG00000258949 | AL049870.3   | NA                                                       | 44898908  | 44911863  | - | 101927418 | 14 | 7   | 0   | 5.821602045  | 0.01729787 | 0.5958645  |
| ENSG00000231995 | AL590399.4   | NA                                                       | 62266319  | 62266919  | + | NA        | 9  | 1   | 10  | -3.191574278 | 0.01395124 | 0.57317426 |
| ENSG00000093072 | ADA2         | adenosine deaminase 2                                    | 17178790  | 17221989  | - | 51816     | 22 | 0   | 8   | -6.033772917 | 0.00894141 | 0.44242407 |
| ENSG00000179133 | C10orf67     | chromosome 10 open reading frame 67                      | 23201916  | 23344845  | - | 256815    | 10 | 0   | 6   | -5.626056987 | 0.03361661 | 0.8324078  |
| ENSG00000282034 | AC106886.5   | novel transcript                                         | 30704067  | 30745169  | + | NA        | 16 | 10  | 2   | 2.230135398  | 0.04430615 | 0.96117306 |
| ENSG00000273218 | AC005776.2   | NA                                                       | 15346068  | 15348417  | - | NA        | 19 | 12  | 1   | 3.408316198  | 0.00444385 | 0.30691904 |
| ENSG00000280211 | AC106886.4   | NA                                                       | 30773532  | 30776033  | - | NA        | 16 | 0   | 7   | -5.844270205 | 0.01729787 | 0.5958645  |
| ENSG00000255399 | TBX5-AS1     | NA                                                       | 114408191 | 114412831 | + | NA        | 12 | 26  | 8   | 1.662151066  | 0.00582377 | 0.3607372  |
| ENSG00000278916 | CEP83-AS1    | NA                                                       | 94460003  | 94462484  | + | 144486    | 12 | 0   | 6   | -5.626056987 | 0.03361661 | 0.8324078  |
| ENSG00000273055 | AC005046.1   | NA                                                       | 107942116 | 107942740 | + | NA        | 7  | 48  | 21  | 1.164860486  | 0.00619366 | 0.3744952  |
| ENSG00000260686 | AC008669.1   | NA                                                       | 122832356 | 122834533 | + | NA        | 5  | 36  | 17  | 1.053944785  | 0.02640494 | 0.77212427 |
| ENSG00000278396 | AL122023.1   | NA                                                       | 93334528  | 93335057  | + | NA        | 14 | 11  | 0   | 6.464372701  | 0.00126829 | 0.14621903 |
| ENSG00000233270 | SNRPEP4      | NA                                                       | 5576660   | 5576938   | - | NA        | 19 | 8   | 21  | -1.401338831 | 0.03484493 | 0.84532906 |
| ENSG00000167220 | HDHD2        | haloacid dehalogenase like hydrolase domain containing 2 | 47107403  | 47150520  | - | 84064     | 18 | 7   | 21  | -1.590791723 | 0.01916925 | 0.63844355 |
| ENSG00000078814 | MYH7B        | myosin heavy chain 7B                                    | 34975403  | 35002437  | + | 57644     | 20 | 72  | 16  | 2.138236737  | 2.80E-07   | 0.00039591 |
| ENSG00000171757 | LRRC34       | leucine rich repeat containing 34                        | 169793428 | 169812986 | - | 151827    | 3  | 20  | 53  | -1.423376297 | 0.00106592 | 0.13364727 |
| ENSG00000238271 | IFNWP19      | NA                                                       | 21455484  | 21456049  | + | NA        | 9  | 23  | 4   | 2.464326383  | 0.00067212 | 0.09763777 |
| ENSG00000278616 | BEND3P3      | NA                                                       | 79682997  | 79685436  | + | NA        | 10 | 8   | 20  | -1.33137288  | 0.04895303 | 1          |
| ENSG00000160838 | LRRC71       | leucine rich repeat containing 71                        | 156920650 | 156933094 | + | 149499    | 1  | 19  | 3   | 2.590995634  | 0.00148807 | 0.15991045 |
| ENSG00000237276 | ANO7L1       | NA                                                       | 16215909  | 16228027  | - | NA        | 1  | 21  | 2   | 3.291090676  | 0.0001437  | 0.03734573 |
| ENSG00000226149 | AL356124.1   | NA                                                       | 129526626 | 129552587 | - | NA        | 6  | 2   | 11  | -2.410535462 | 0.02678048 | 0.77212427 |
| ENSG00000224152 | AC009506.1   | NA                                                       | 159615296 | 159617082 | + | NA        | 2  | 12  | 3   | 1.93356416   | 0.04197539 | 0.95430001 |
| ENSG00000231172 | AC007099.1   | NA                                                       | 75524068  | 75542706  | + | 101927884 | 2  | 7   | 0   | 5.821602045  | 0.01729787 | 0.5958645  |
| ENSG00000171017 | LRRC8E       | leucine rich repeat containing 8 VRAC subunit E          | 7888505   | 7902021   | + | 80131     | 19 | 8   | 0   | 6.011054937  | 0.00894141 | 0.44242407 |
| ENSG00000178752 | ERFE         | erythroferrone                                           | 238158982 | 238168900 | + | 151176    | 2  | 53  | 26  | 1.000969301  | 0.01230527 | 0.53917642 |
| ENSG00000124882 | EREG         | epiregulin                                               | 74365143  | 74388751  | + | 2069      | 4  | 434 | 183 | 1.222220002  | 4.62E-07   | 0.00060606 |
| ENSG00000187045 | TMPRSS6      | transmembrane serine protease 6                          | 37065436  | 37109563  | - | 164656    | 22 | 7   | 0   | 5.821602045  | 0.01729787 | 0.5958645  |
| ENSG00000235946 | AC234783.1   | NA                                                       | 104062542 | 104063037 | - | NA        | X  | 0   | 7   | -5.844270205 | 0.01729787 | 0.5958645  |
| ENSG00000164929 | BAAALC       | BAAALC, MAP3K1 and KLF4 binding                          | 103140710 | 103230305 | + | 79870     | 8  | 7   | 28  | -2.003710468 | 0.00128011 | 0.14621903 |
| ENSG00000239407 | Z68871.1     | NA                                                       | 102884414 | 102906158 | + | NA        | X  | 46  | 19  | 1.247122889  | 0.00441553 | 0.30691904 |
| ENSG00000155966 | AF2          | AF4/FMR2 family member 2                                 | 148500619 | 149000663 | + | 2334      | X  | 62  | 21  | 1.53324114   | 0.00015003 | 0.03862803 |
| ENSG00000087494 | PTH1LH       | parathyroid hormone like hormone                         | 27958084  | 27972705  | - | 5744      | 12 | 0   | 6   | -5.626056987 | 0.03361661 | 0.8324078  |
| ENSG00000133105 | RXFP2        | relaxin family peptide receptor 2                        | 31739542  | 31803388  | + | 122042    | 13 | 7   | 0   | 5.821602045  | 0.01729787 | 0.5958645  |
| ENSG00000182631 | RXFP3        | relaxin family peptide receptor 3                        | 33936386  | 33938237  | + | 51289     | 5  | 0   | 8   | -6.033772917 | 0.00894141 | 0.44242407 |
| ENSG00000278834 | AC073508.3   | NA                                                       | 40648300  | 40649718  | + | NA        | 17 | 11  | 1   | 3.284147477  | 0.00788025 | 0.42560136 |
| ENSG00000245156 | AP001107.1   | NA                                                       | 66269832  | 66278525  | - | NA        | 11 | 13  | 0   | 6.702865037  | 0.00035249 | 0.06443635 |
| ENSG00000254756 | AP001107.6   | NA                                                       | 66334494  | 66339875  | + | NA        | 11 | 11  | 1   | 3.284147477  | 0.00788025 | 0.42560136 |
| ENSG00000235159 | AL121672.2   | NA                                                       | 46067356  | 46069891  | - | NA        | 22 | 13  | 2   | 2.604498362  | 0.00961124 | 0.45874658 |
| ENSG00000258315 | C17orf49     | chromosome 17 open reading frame 49                      | 7014495   | 7017525   | + | 124944    | 17 | 1   | 11  | -3.32747051  | 0.00788025 | 0.42560136 |
| ENSG00000214226 | C17orf67     | chromosome 17 open reading frame 67                      | 56791913  | 56838773  | - | 339210    | 17 | 43  | 19  | 1.150100609  | 0.00971496 | 0.46097241 |
| ENSG00000258902 | AL049775.2   | NA                                                       | 85362457  | 85516934  | - | NA        | 14 | 45  | 18  | 1.292984515  | 0.00366341 | 0.28588237 |
| ENSG00000242798 | AC073842.2   | NA                                                       | 100115214 | 100127139 | - | NA        | 7  | 2   | 14  | -2.755008525 | 0.00572059 | 0.35537281 |
| ENSG00000214338 | SOGA3        | SOGA family member 3                                     | 127472794 | 127519191 | - | NA        | 6  | 0   | 8   | -6.033772917 | 0.00894141 | 0.44242407 |
| ENSG00000168229 | PTGDR        | prostaglandin D2 receptor                                | 52267713  | 52276724  | + | 5729      | 14 | 8   | 0   | 6.011054937  | 0.00894141 | 0.44242407 |
| ENSG00000073350 | LLGL2        | LLGL2, scribble cell polarity complex component          | 75525080  | 75575208  | + | 3993      | 17 | 8   | 0   | 6.011054937  | 0.00894141 | 0.44242407 |
| ENSG00000117507 | FMO6P        | NA                                                       | 171137740 | 171161568 | + | 388714    | 1  | 4   | 21  | -2.379140453 | 0.00169524 | 0.17655137 |
| ENSG00000284652 | BX323043.1   | NA                                                       | 9421098   | 9422862   | - | NA        | 1  | 1   | 9   | -3.041533225 | 0.02463495 | 0.74193929 |
| ENSG00000187017 | ESPN         | espin                                                    | 6424788   | 6461370   | + | 83715     | 1  | 1   | 8   | -2.874057027 | 0.04333145 | 0.95821355 |
| ENSG00000091831 | ESR1         | estrogen receptor 1                                      | 151656691 | 152129619 | + | 2099      | 6  | 12  | 1   | 3.408316198  | 0.00444385 | 0.30691904 |
| ENSG00000282840 | AC004554.2   | NA                                                       | 11668401  | 11757718  | - | NA        | X  | 0   | 9   | -6.201249115 | 0.00464266 | 0.30691904 |
| ENSG00000270808 | AC022400.4   | NA                                                       | 73740538  | 73740823  | - | NA        | 10 | 7   | 0   | 5.821602045  | 0.01729787 | 0.5958645  |
| ENSG00000120215 | MLANA        | melan-A                                                  | 5910606   | 5910606   | + | 2315      | 9  | 10  | 26  | -1.390384455 | 0.01953014 | 0.64560355 |
| ENSG00000253829 | AC067817.2   | NA                                                       | 38844866  | 38846439  | - | NA        | 8  | 7   | 0   | 5.821602045  | 0.01729787 | 0.5958645  |
| ENSG00000187546 | AGMO         | alkylglycerol monoxygenase                               | 15200318  | 15562015  | - | 392636    | 7  | 44  | 91  | -1.069275066 | 0.00160508 | 0.16965643 |
| ENSG00000262075 | DKFZP434A062 | NA                                                       | 136322303 | 136327323 | - | 26102     | 9  | 7   | 0   | 5.821602045  | 0.01729787 | 0.5958645  |
| ENSG00000201579 | RNU6-343P    | NA                                                       | 56588518  | 56588621  | + | NA        | 12 | 8   | 0   | 6.011054937  | 0.00894141 | 0.44242407 |
| ENSG00000279179 | AL662907.2   | NA                                                       | 33162851  | 33166298  | + | NA        | 1  | 12  | 27  | -1.184539242 | 0.03830181 | 0.90546426 |
| ENSG00000229589 | ACVR2B-AS1   | NA                                                       | 38451027  | 38454820  | - | 100128640 | 3  | 6   | 0   | 5.603454913  | 0.03361661 | 0.8324078  |
| ENSG00000155761 | SPAG17       | sperm associated antigen 17                              | 117953861 | 118185223 | - | 200162    | 1  | 8   | 0   | 6.011054937  | 0.00894141 | 0.44242407 |
| ENSG00000160284 | SPATC1L      | spermatogenesis and centriole associated 1 like          | 46161148  | 46184476  | - | 84221     | 21 | 39  | 109 | -1.502841866 | 7.67E-06   | 0.00481643 |
| ENSG00000197261 | C6orf141     | chromosome 6 open reading frame 141                      | 49550646  | 49561907  | + | 135398    | 6  | 7   | 25  | -1.840974846 | 0.00418133 | 0.30691904 |
| ENSG00000075275 | CELSR1       | cadherin EGF LAG seven-pass G-type receptor 1            | 46360834  | 46537170  | - | 9620      | 22 | 10  | 0   | 6.328502073  | 0.00242129 | 0.21443156 |
| ENSG00000154760 | SLFN13       | schlafen family member 13                                | 35435096  | 35448837  | - | 146857    | 17 | 24  | 6   | 1.954969477  | 0.00285251 | 0.23661633 |
| ENSG00000247982 | LINC00926    | NA                                                       | 57300365  | 57307769  | + | 283663    | 15 | 16  | 34  | -1.104471142 | 0.02990678 | 0.8324078  |
| ENSG00000281005 | LINC00921    | NA                                                       | 3263743   | 3267567   | + | 283876    | 16 | 0   | 13  | -6.72571824  | 0.00035249 | 0.06443635 |
| ENSG00000189238 | LINC00943    | NA                                                       | 126726270 | 126746252 | + | NA        | 12 | 11  | 1   | 3.284147477  | 0.00788025 | 0.42560136 |
| ENSG00000100300 | ETV7         | ETS variant 7                                            | 36354091  | 36387800  | - | 51513     | 6  | 2   | 14  | -2.755008525 |            |            |

|                  |            |                                                   |           |           |   |           |    |      |      |              |            |            |
|------------------|------------|---------------------------------------------------|-----------|-----------|---|-----------|----|------|------|--------------|------------|------------|
| ENSG00000242294  | STAG3L5P   | NA                                                | 100336079 | 100351900 | + | 101735302 | 7  | 14   | 34   | -1.295506774 | 0.01249671 | 0.54336246 |
| ENSG00000145423  | SFRP2      | secreted frizzled related protein 2               | 153780592 | 153789120 | - | 6423      | 4  | 88   | 240  | -1.469212928 | 5.85E-08   | 0.00011054 |
| ENSG00000231672  | DIRC3      | NA                                                | 217284019 | 217756593 | - | NA        | 2  | 7    | 0    | 5.821602045  | 0.01729787 | 0.5958645  |
| ENSG00000172673  | THEMIS     | thymocyte selection associated                    | 127708072 | 127918631 | - | 387357    | 6  | 4    | 15   | -1.897097174 | 0.02504257 | 0.74870021 |
| ENSG00000223653  | AL078459.1 | NA                                                | 85276715  | 85448124  | + | NA        | 1  | 4    | 17   | -2.076277155 | 0.01039936 | 0.47399509 |
| ENSG00000163694  | RBM47      | RNA binding motif protein 47                      | 40423267  | 40630875  | - | 54502     | 4  | 6    | 20   | -1.738972905 | 0.01430617 | 0.58310523 |
| ENSG00000227256  | MIS18A-AS1 | NA                                                | 32277863  | 32280988  | + | NA        | 21 | 0    | 6    | -5.626056987 | 0.03361661 | 0.8324078  |
| ENSG00000103888  | CEMIP      | cell migration inducing hyaluronidase 1           | 80779343  | 80951776  | + | 57214     | 15 | 2793 | 7366 | -1.422097968 | 1.38E-11   | 6.49E-08   |
| ENSG00000181031  | RPH3AL     | rabphilin 3A like (without C2 domains)            | 212389    | 386254    | - | 9501      | 17 | 7    | 22   | -1.657520922 | 0.01319757 | 0.55984925 |
| ENSG00000165874  | FAM35BP    | NA                                                | 46610474  | 46652025  | - | 414241    | 10 | 10   | 26   | -1.390384455 | 0.01953014 | 0.64560355 |
| ENSG00000265912  | AC037487.1 | NA                                                | 64943262  | 64951054  | + | NA        | 17 | 0    | 7    | -5.844270205 | 0.01729787 | 0.5958645  |
| ENSG00000278876  | AC145207.9 | NA                                                | 81862778  | 81863102  | + | NA        | 17 | 2    | 15   | -2.85369955  | 0.00339444 | 0.27265605 |
| ENSG00000263731  | AC145207.5 | NA                                                | 81878425  | 81881106  | - | NA        | 17 | 14   | 31   | -1.162747492 | 0.02943072 | 0.82585301 |
| ENSG00000241218  | AC063944.2 | NA                                                | 107327830 | 107329197 | - | NA        | 3  | 1    | 11   | -3.32747051  | 0.00788025 | 0.42560136 |
| ENSG00000239828  | AC063944.1 | NA                                                | 107272611 | 107421304 | - | NA        | 3  | 11   | 2    | 2.366006025  | 0.02678048 | 0.77212427 |
| ENSG00000273368  | AC006566.1 | NA                                                | 8154558   | 8155070   | + | NA        | 18 | 6    | 0    | 5.603454913  | 0.03361661 | 0.8324078  |
| ENSG00000253210  | AC040970.1 | NA                                                | 141126044 | 141129961 | - | NA        | 8  | 21   | 8    | 1.355684435  | 0.03484493 | 0.84532906 |
| ENSG00000264575  | LINC00526  | NA                                                | 5236724   | 5238598   | - | NA        | 18 | 4    | 15   | -1.897097174 | 0.02504257 | 0.74870021 |
| ENSG00000258791  | LINC00520  | NA                                                | 55781135  | 55796688  | - | 645687    | 14 | 16   | 4    | 1.944199246  | 0.0161862  | 0.5958645  |
| ENSG00000123329  | ARHGAP9    | Rho GTPase activating protein 9                   | 57472255  | 57488814  | - | 64333     | 12 | 1    | 8    | -2.874057027 | 0.04333145 | 0.95821355 |
| ENSG00000279331  | RBM12B-AS1 | NA                                                | 93740121  | 93740773  | + | 55472     | 8  | 18   | 5    | 1.799645102  | 0.01534811 | 0.5958645  |
| ENSG00000235410  | AL157896.1 | NA                                                | 14074284  | 14087605  | + | NA        | 10 | 9    | 0    | 6.178492236  | 0.00464266 | 0.30691904 |
| ENSG00000223685  | LINC00571  | NA                                                | 38050817  | 38143232  | - | 100874188 | 13 | 23   | 4    | 2.464326383  | 0.00067212 | 0.09763777 |
| ENSG00000157168  | NRG1       | neuregulin 1                                      | 31639386  | 32767959  | + | 3084      | 8  | 98   | 32   | 1.587910939  | 5.65E-06   | 0.00376421 |
| ENSG00000158458  | NRG2       | neuregulin 2                                      | 139846779 | 140043299 | + | 9542      | 5  | 0    | 11   | -6.4871864   | 0.00126829 | 0.14621903 |
| ENSG00000169752  | NRG4       | neuregulin 4                                      | 75935969  | 76059795  | - | 145957    | 15 | 21   | 3    | 2.734480089  | 0.00055646 | 0.08847317 |
| ENSG00000251191  | LINC00589  | NA                                                | 29673922  | 29748109  | - | 619351    | 8  | 8    | 0    | 6.011054937  | 0.00894141 | 0.44242407 |
| ENSG00000135298  | ADGRB3     | adhesion G protein-coupled receptor B3            | 68635367  | 69389511  | + | 577       | 6  | 18   | 6    | 1.542441316  | 0.0310526  | 0.8324078  |
| ENSG00000178662  | CSRNP3     | cysteine and serine rich nuclear protein 3        | 165469647 | 165689407 | + | 80034     | 2  | 16   | 33   | -1.061561275 | 0.03880228 | 0.90953385 |
| ENSG00000243953  | AC073359.1 | NA                                                | 154969283 | 154970223 | - | 105374171 | 3  | 12   | 1    | 3.408316198  | 0.00444385 | 0.30691904 |
| ENSG00000203724  | C1orf53    | chromosome 1 open reading frame 53                | 197902647 | 197907367 | + | 388722    | 1  | 29   | 86   | -1.587180714 | 1.41E-05   | 0.00732216 |
| ENSG00000153294  | ADGRF4     | adhesion G protein-coupled receptor F4            | 47685864  | 47722021  | + | 221393    | 6  | 39   | 9    | 2.077316244  | 9.19E-05   | 0.0277068  |
| ENSG00000069122  | ADGRF5     | adhesion G protein-coupled receptor F5            | 46852512  | 46954943  | - | 221395    | 6  | 8    | 1    | 2.830829713  | 0.04333145 | 0.95821355 |
| ENSG00000039139  | DNAH5      | dynein axonemal heavy chain 5                     | 13690331  | 13944543  | - | 1767      | 5  | 45   | 13   | 1.758678398  | 0.00021875 | 0.04859947 |
| ENSG00000203327  | AC012358.1 | NA                                                | 55214387  | 55216126  | - | NA        | 2  | 4    | 16   | -1.989467105 | 0.0161862  | 0.5958645  |
| ENSG00000235532  | LINC00402  | NA                                                | 74231457  | 74259976  | - | 100507612 | 13 | 11   | 2    | 2.366006025  | 0.02678048 | 0.77212427 |
| ENSG00000239472  | RN7SL221P  | NA                                                | 5918564   | 5918844   | - | NA        | 6  | 0    | 6    | -5.626056987 | 0.03361661 | 0.8324078  |
| ENSG00000201499  | RNU6-312P  | NA                                                | 200881715 | 200881821 | - | NA        | 2  | 0    | 6    | -5.626056987 | 0.03361661 | 0.8324078  |
| ENSG00000178093  | TSSK6      | testis specific serine kinase 6                   | 19512418  | 19515685  | - | 83983     | 19 | 14   | 32   | -1.208371551 | 0.02221906 | 0.70640908 |
| ENSG00000139908  | TSSK4      | testis specific serine kinase 4                   | 24205697  | 24208362  | + | 283629    | 14 | 52   | 24   | 1.088461035  | 0.00758323 | 0.42411433 |
| ENSG00000181029  | TRAPP5     | trafficking protein particle complex 5            | 7680843   | 7687703   | + | 126003    | 19 | 1    | 9    | -3.041533225 | 0.02463495 | 0.74193929 |
| ENSG00000198624  | CCDC69     | coiled-coil domain containing 69                  | 151181052 | 151224145 | - | 26112     | 5  | 27   | 77   | -1.530576528 | 4.84E-05   | 0.01913526 |
| ENSG00000225511  | LINC00475  | NA                                                | 92141298  | 92160114  | + | NA        | 9  | 9    | 31   | -1.79304596  | 0.0018476  | 0.18493969 |
| ENSG00000181798  | LINC00471  | NA                                                | 231508426 | 231514339 | - | 151477    | 2  | 0    | 8    | -6.033772917 | 0.00894141 | 0.44242407 |
| ENSG00000138759  | FRAS1      | Fraser extracellular matrix complex subunit 1     | 78057570  | 78544269  | + | 80144     | 4  | 30   | 71   | -1.262400304 | 0.00076235 | 0.10638227 |
| ENSG00000142102  | PGGHG      | protein-glucosylgalactosylhydroxylase             | 289135    | 296107    | + | 80162     | 11 | 160  | 370  | -1.231874053 | 6.46E-07   | 0.00079572 |
| ENSG00000225556  | C2CD4D     | C2 calcium dependent domain containing 4D         | 151837819 | 151840557 | - | 100191040 | 1  | 1    | 14   | -3.671943573 | 0.00141036 | 0.15455355 |
| ENSG00000232762  | AL355483.3 | NA                                                | 53304536  | 53307462  | + | NA        | 1  | 6    | 0    | 5.603454913  | 0.03361661 | 0.8324078  |
| ENSG00000241081  | AF111169.1 | NA                                                | 76886377  | 76886750  | - | NA        | 14 | 6    | 25   | -2.059121978 | 0.00188767 | 0.18640307 |
| ENSG000000002745 | WNT16      | Wnt family member 16                              | 121325367 | 121341104 | + | 51384     | 7  | 6    | 19   | -1.665440123 | 0.02114381 | 0.68177571 |
| ENSG00000103742  | IGDCC4     | immunoglobulin superfamily DCC subclass member 4  | 65381464  | 65423072  | - | 57722     | 15 | 34   | 15   | 1.150958564  | 0.01970762 | 0.64839435 |
| ENSG00000179715  | PCED1B     | PC-esterase domain containing 1B                  | 47079603  | 47236662  | + | 91523     | 12 | 59   | 27   | 1.101149753  | 0.00459709 | 0.30691904 |
| ENSG00000212259  | RNU6-308P  | NA                                                | 95521369  | 95521475  | + | NA        | 5  | 6    | 0    | 5.603454913  | 0.03361661 | 0.8324078  |
| ENSG00000119698  | PPP4R4     | protein phosphatase 4 regulatory subunit 4        | 94146128  | 94279735  | + | 57718     | 14 | 45   | 9    | 2.283147523  | 9.16E-06   | 0.00534986 |
| ENSG00000162706  | CADM3      | cell adhesion molecule 3                          | 159171609 | 159203313 | + | 57863     | 1  | 8    | 1    | 2.830829713  | 0.04333145 | 0.95821355 |
| ENSG00000175161  | CADM2      | cell adhesion molecule 2                          | 84958981  | 86074429  | + | 253559    | 3  | 19   | 7    | 1.401702691  | 0.03970312 | 0.92328994 |
| ENSG00000253669  | GASAL1     | NA                                                | 102805517 | 102809971 | + | NA        | 8  | 15   | 54   | -1.862310937 | 4.43E-05   | 0.01792154 |
| ENSG00000230510  | PPP5D1     | PPP5 tetratricopeptide repeat domain containing 1 | 46480796  | 46601200  | - | 100506012 | 19 | 2    | 20   | -3.26577688  | 0.00024375 | 0.05305877 |
| ENSG0000029534   | ANK1       | ankyrin 1                                         | 41653220  | 41896762  | - | 286       | 8  | 12   | 27   | -1.184539242 | 0.03830181 | 0.90546426 |
| ENSG00000270427  | NRBF2P5    | NA                                                | 5776071   | 5776858   | + | NA        | 10 | 6    | 0    | 5.603454913  | 0.03361661 | 0.8324078  |
| ENSG00000231167  | YBX1P2     | NA                                                | 105582258 | 105583256 | - | NA        | 7  | 5    | 24   | -2.257636854 | 0.00117769 | 0.14474367 |
| ENSG00000131620  | ANO1       | anoctamin 1                                       | 70078302  | 70189528  | + | 55107     | 11 | 0    | 8    | -6.033772917 | 0.00894141 | 0.44242407 |
| ENSG00000183171  | BX322650.1 | NA                                                | 150114378 | 150116520 | + | NA        | X  | 9    | 1    | 2.998267012  | 0.02463495 | 0.74193929 |
| ENSG00000248927  | AC114284.1 | NA                                                | 120781218 | 120790778 | + | NA        | 5  | 23   | 50   | -1.13905878  | 0.00834948 | 0.44242407 |
| ENSG00000273226  | AL391834.2 | NA                                                | 19375451  | 19375996  | + | NA        | 9  | 17   | 1    | 3.906400717  | 0.00025279 | 0.0532408  |
| ENSG00000243742  | RPLP0P2    | NA                                                | 61615036  | 61639449  | + | 113157    | 11 | 69   | 17   | 1.990135717  | 1.55E-06   | 0.00149041 |
| ENSG00000270300  | PHACTR2P1  | NA                                                | 119793589 | 119816642 | + | NA        | 10 | 0    | 9    | -6.201249115 | 0.00464266 | 0.30691904 |
| ENSG00000204187  | LINC00619  | NA                                                | 43845306  | 43850622  | + | NA        | 10 | 0    | 7    | -5.844270205 | 0.01729787 | 0.5958645  |
| ENSG00000189001  | SBSN       | suprabasin                                        | 35523367  | 35528351  | - | 374897    | 19 | 13   | 1    | 3.522639813  | 0.00250381 | 0.21723364 |
| ENSG00000131480  | AOC2       | amine oxidase, copper containing 2                | 42844600  | 42850707  | + | 314       | 17 | 30   | 10   | 1.55015669   | 0.00510013 | 0.33098241 |
| ENSG00000214676  | RPL9P16    | NA                                                | 168755816 | 168756382 | + | NA        | 4  | 6    | 0    | 5.603454913  | 0.03361661 | 0.8324078  |
| ENSG00000254990  | AP001781.2 | NA                                                | 111768668 | 111778350 | - | NA        | 11 | 1    | 9    | -3.041533225 | 0.02463495 | 0.74193929 |
| ENSG00000260941  | LINC00622  | NA                                                | 119597702 | 119599271 | - | 644242    | 1  | 13   | 1    | 3.522639813  | 0.00250381 | 0.21723364 |
| ENSG00000283103  | AC010642.2 | NA                                                | 58310449  | 58326933  | - | NA        | 19 | 28   | 12   | 1.190965615  | 0.02851606 | 0.80657876 |
| ENSG00000214353  | VAC14-AS1  | NA                                                | 70755098  | 70773251  | + | 100130894 | 16 | 0    | 9    | -6.201249115 | 0.00464266 | 0.30691904 |
| ENSG00000188517  | COL25A1    | collagen type XXV alpha 1 chain                   | 108810721 | 109302657 | - | 84570     | 4  | 37   | 12   | 1.591491116  | 0.00164801 | 0.17322399 |
| ENSG00000248719  | AC021127.1 | NA                                                | 80183280  | 80190169  | - | NA        | 4  | 6    | 0    | 5.603454913  | 0.03361661 | 0.8324078  |
| ENSG00000019102  | VSIG2      | V-set and immunoglobulin domain containing 2      | 124747472 | 124752238 | - | 23584     | 11 | 7    | 0    | 5.821602045  | 0.01729787 | 0.5958645  |
| ENSG00000236194  | AC099811.1 | NA                                                | 42270517  | 42272683  | - | NA        | 17 | 16   | 0    | 6.999826336  | 5.33E-05   | 0.0193511  |
| ENSG00000275964  | AL355001.2 | NA                                                | 19863858  | 19865048  | + | NA        | 13 | 1    | 12   | -3.451660612 | 0.00444385 | 0.30691904 |
| ENSG00000215447  | BX322557.1 | NA                                                | 45288052  | 45291738  | + | NA        | 21 | 283  | 114  | 1.287769074  | 7.26E-07   | 0.00087482 |
| ENSG00000201700  | SNORD113-3 | NA                                                | 100929919 | 100929990 | + | 767563    | 14 | 14   | 3    | 2.153813442  | 0.01657597 | 0.5958645  |
| ENSG00000130489  | SCO2       | SCO2, cytochrome c oxidase assembly protein       | 50523568  | 50525606  | - | 9997      | 22 | 13   | 28   | -1.122447476 | 0.04444927 | 0.96117306 |
| ENSG00000284194  | SCO2       | SCO2, cytochrome c oxidase assembly protein       | 50523568  | 50526439  | - |           |    |      |      |              |            |            |



|                 |             |                                                    |           |           |   |           |    |     |     |              |            |            |
|-----------------|-------------|----------------------------------------------------|-----------|-----------|---|-----------|----|-----|-----|--------------|------------|------------|
| ENSG00000168955 | TM4SF20     | transmembrane 4 L six family member 20             | 227362156 | 227381995 | - | 79853     | 2  | 0   | 6   | -5.626056987 | 0.03361661 | 0.8324078  |
| ENSG00000250644 | AC068580.4  | novel protein                                      | 1734821   | 1763954   | - | NA        | 11 | 0   | 7   | -5.844270205 | 0.01729787 | 0.5958645  |
| ENSG00000280604 | AJ239328.1  | NA                                                 | 45914296  | 45919483  | + | NA        | 21 | 42  | 9   | 2.183899553  | 2.91E-05   | 0.01270536 |
| ENSG00000251455 | AC092611.1  | NA                                                 | 151674483 | 151677893 | + | NA        | 4  | 1   | 8   | -2.874057027 | 0.04333145 | 0.95821355 |
| ENSG00000267710 | EDDM13      | epididymal protein 13                              | 56272769  | 56310450  | + | 100506374 | 19 | 4   | 14  | -1.798406149 | 0.03847433 | 0.90546426 |
| ENSG00000228434 | AC004951.1  | NA                                                 | 44004046  | 44007866  | - | NA        | 7  | 9   | 1   | 2.998267012  | 0.02463495 | 0.74193929 |
| ENSG00000109321 | AREG        | amphiregulin                                       | 74445134  | 74455009  | + | 374       | 4  | 340 | 167 | 1.002077419  | 4.85E-05   | 0.01913526 |
| ENSG00000267345 | AC010632.1  | NA                                                 | 37075113  | 37078605  | - | NA        | 19 | 0   | 6   | -5.626056987 | 0.03361661 | 0.8324078  |
| ENSG00000282556 | AC068733.3  | NA                                                 | 6323554   | 6324023   | + | 101927825 | 11 | 0   | 7   | -5.844270205 | 0.01729787 | 0.5958645  |
| ENSG00000188761 | BCL2L15     | BCL2 like 15                                       | 113878168 | 113887547 | - | 440603    | 1  | 0   | 6   | -5.626056987 | 0.03361661 | 0.8324078  |
| ENSG00000227925 | LINC01655   | NA                                                 | 221827666 | 221840666 | - | 101929771 | 1  | 9   | 0   | 6.178492236  | 0.00464266 | 0.30691904 |
| ENSG00000261584 | AL513548.1  | NA                                                 | 26686241  | 26687964  | + | NA        | 6  | 0   | 13  | -6.72571824  | 0.00035249 | 0.06443635 |
| ENSG00000278727 | AC000403.1  | NA                                                 | 76887551  | 76891135  | - | NA        | 13 | 29  | 10  | 1.501455142  | 0.00718023 | 0.41003926 |
| ENSG00000212128 | TAS2R13     | taste 2 receptor member 13                         | 10907926  | 10909562  | - | 50838     | 12 | 1   | 10  | -3.191574278 | 0.01395124 | 0.57317426 |
| ENSG00000268521 | VN1R83P     | NA                                                 | 21289554  | 21289998  | - | NA        | 19 | 8   | 1   | 2.830829713  | 0.04333145 | 0.95821355 |
| ENSG00000273680 | AC009318.2  | NA                                                 | 29332733  | 29333383  | - | NA        | 12 | 11  | 35  | -1.68159516  | 0.00172226 | 0.1783814  |
| ENSG00000222640 | RNU2-51P    | NA                                                 | 70360892  | 70361088  | + | NA        | 14 | 6   | 0   | 5.603454913  | 0.03361661 | 0.8324078  |
| ENSG00000124743 | KLHL31      | kelch like family member 31                        | 53647901  | 53665708  | - | 401265    | 6  | 8   | 0   | 6.011054937  | 0.00894141 | 0.44242407 |
| ENSG00000223813 | AC007255.1  | NA                                                 | 29514225  | 29563670  | - | NA        | 7  | 11  | 27  | -1.308707964 | 0.02384497 | 0.73821694 |
| ENSG00000268357 | VN1R81P     | NA                                                 | 21123817  | 21124188  | + | NA        | 19 | 11  | 2   | 2.366006025  | 0.02678048 | 0.77212427 |
| ENSG00000269918 | AF131215.6  | NA                                                 | 11104691  | 11106704  | - | NA        | 8  | 9   | 38  | -2.085719968 | 0.00013459 | 0.03613751 |
| ENSG00000271941 | AC104184.1  | NA                                                 | 43346923  | 43347643  | - | NA        | 3  | 6   | 0   | 5.603454913  | 0.03361661 | 0.8324078  |
| ENSG00000102048 | ASB9        | ankyrin repeat and SOCS box containing 9           | 15235288  | 15270467  | - | 140462    | X  | 0   | 12  | -6.611376502 | 0.00066721 | 0.09763777 |
| ENSG00000164512 | ANKRD55     | ankyrin repeat domain 55                           | 56099678  | 56233359  | - | 79722     | 5  | 2   | 10  | -2.27463923  | 0.04430615 | 0.96117306 |
| ENSG00000186352 | ANKRD37     | ankyrin repeat domain 37                           | 185396021 | 185400628 | + | 353322    | 4  | 45  | 92  | -1.052691113 | 0.00179949 | 0.18369351 |
| ENSG00000198483 | ANKRD35     | ankyrin repeat domain 35                           | 145886560 | 145885866 | - | 148741    | 1  | 97  | 247 | -1.370378625 | 2.93E-07   | 0.00040547 |
| ENSG00000253658 | LINC01592   | NA                                                 | 68911803  | 69104190  | - | 100505718 | 8  | 12  | 1   | 3.408316198  | 0.00444385 | 0.30691904 |
| ENSG00000276644 | DACH1       | dachshund family transcription factor 1            | 71437966  | 71867192  | - | 1602      | 13 | 12  | 2   | 2.490174747  | 0.01608407 | 0.5958645  |
| ENSG00000115290 | GRB14       | growth factor receptor bound protein 14            | 164492812 | 164621848 | - | 2888      | 2  | 90  | 32  | 1.465218849  | 3.63E-05   | 0.01513292 |
| ENSG00000145700 | ANKRD31     | ankyrin repeat domain 31                           | 75068275  | 75236878  | - | 256006    | 5  | 2   | 11  | -2.410535462 | 0.02678048 | 0.77212427 |
| ENSG00000271075 | AL139317.4  | NA                                                 | 52871458  | 52872217  | + | NA        | 14 | 10  | 0   | 6.328502073  | 0.00242129 | 0.21443156 |
| ENSG00000261008 | LINC01572   | NA                                                 | 72283301  | 72665009  | - | 101927957 | 16 | 26  | 4   | 2.640296894  | 0.00016562 | 0.04097549 |
| ENSG00000282021 | AC100810.3  | NA                                                 | 1758208   | 1760447   | - | NA        | 8  | 0   | 6   | -5.626056987 | 0.03361661 | 0.8324078  |
| ENSG00000180861 | LINC01559   | NA                                                 | 13731089  | 13387167  | - | 283422    | 12 | 7   | 0   | 5.821602045  | 0.01729787 | 0.5958645  |
| ENSG00000118515 | SGK1        | serum/glucocorticoid regulated kinase 1            | 134169246 | 134318112 | - | 6446      | 6  | 940 | 457 | 1.017195619  | 4.61E-06   | 0.00318851 |
| ENSG00000213199 | ASIC3       | acid sensing ion channel subunit 3                 | 151048292 | 151052756 | + | 9311      | 7  | 0   | 15  | -6.930350488 | 9.96E-05   | 0.02829695 |
| ENSG00000246477 | AF131216.1  | NA                                                 | 11315859  | 11325429  | - | NA        | 8  | 31  | 11  | 1.461371517  | 0.00660661 | 0.38704964 |
| ENSG00000255020 | AF131216.3  | NA                                                 | 11345748  | 11347502  | - | 100129129 | 8  | 0   | 6   | -5.626056987 | 0.03361661 | 0.8324078  |
| ENSG00000280273 | AF131216.4  | NA                                                 | 11283481  | 11285068  | - | NA        | 8  | 0   | 6   | -5.626056987 | 0.03361661 | 0.8324078  |
| ENSG00000162772 | ATF3        | activating transcription factor 3                  | 212565334 | 212620777 | + | 467       | 1  | 391 | 132 | 1.542667943  | 8.06E-10   | 2.28E-06   |
| ENSG00000117242 | PINK1-AS    | NA                                                 | 20642657  | 20652193  | - | 100861548 | 1  | 25  | 54  | -1.130160428 | 0.00690226 | 0.39902814 |
| ENSG00000259030 | FPGT-TNNI3K | FPGT-TNNI3K readthrough                            | 74198235  | 74543982  | + | 100526835 | 1  | 9   | 23  | -1.364409461 | 0.03063511 | 0.8324078  |
| ENSG00000129946 | SHC2        | SHC adaptor protein 2                              | 416583    | 460996    | - | 25759     | 19 | 35  | 72  | -1.061013081 | 0.00364911 | 0.28542107 |
| ENSG00000148082 | SHC3        | SHC adaptor protein 3                              | 89005771  | 89178767  | - | 53358     | 9  | 454 | 213 | 1.068326628  | 7.82E-06   | 0.00481643 |
| ENSG00000205639 | MFSD2B      | major facilitator superfamily domain containing 2B | 24010081  | 24063321  | + | 388931    | 2  | 8   | 24  | -1.59292492  | 0.01209816 | 0.53423305 |
| ENSG00000168389 | MFSD2A      | major facilitator superfamily domain containing 2A | 39955112  | 39969968  | + | 84879     | 1  | 116 | 56  | 1.025928323  | 0.00122568 | 0.14621903 |
| ENSG00000223458 | LMO7DN-IT1  | NA                                                 | 75876886  | 75881127  | + | 104326189 | 13 | 0   | 10  | -6.351290168 | 0.00242129 | 0.21443156 |
| ENSG00000188878 | FBF1        | Fas binding factor 1                               | 75909574  | 75941140  | - | 85302     | 17 | 17  | 39  | -1.214938643 | 0.01197492 | 0.53210919 |
| ENSG00000228889 | UBAC2-AS1   | NA                                                 | 99196377  | 99200710  | - | 100289373 | 13 | 9   | 23  | -1.364409461 | 0.03063511 | 0.8324078  |
| ENSG00000259985 | AC017100.1  | NA                                                 | 31685655  | 31686823  | + | NA        | 18 | 36  | 4   | 3.107848165  | 1.51E-06   | 0.00149041 |
| ENSG00000102796 | DHRS12      | dehydrogenase/reductase 12                         | 51767993  | 51804157  | - | 79758     | 13 | 31  | 63  | -1.043141412 | 0.00764158 | 0.42552295 |
| ENSG00000167536 | DHRS13      | dehydrogenase/reductase 13                         | 28897781  | 28903071  | - | 147015    | 17 | 22  | 54  | -1.313598787 | 0.00206394 | 0.19819111 |
| ENSG00000162997 | PRORS1P     | NA                                                 | 55282319  | 55284522  | + | 344405    | 2  | 13  | 33  | -1.358522574 | 0.01030639 | 0.47399509 |
| ENSG00000185960 | SHOX        | short stature homeobox                             | 624344    | 659411    | + | 6473      | X  | 25  | 9   | 1.438369624  | 0.01560431 | 0.5958645  |
| ENSG00000140876 | NUDT7       | nudix hydrolase 7                                  | 77722492  | 77742260  | + | 283927    | 16 | 15  | 3   | 2.252490968  | 0.0103193  | 0.47399509 |
| ENSG00000167799 | NUDT8       | nudix hydrolase 8                                  | 67627938  | 67629930  | - | 254552    | 11 | 10  | 29  | -1.547217154 | 0.00718023 | 0.41003926 |
| ENSG00000253878 | AC087752.3  | NA                                                 | 94950037  | 94951396  | + | NA        | 8  | 15  | 2   | 2.809101555  | 0.00339444 | 0.27265605 |
| ENSG00000262115 | AC027601.2  | NA                                                 | 81197393  | 81200288  | + | NA        | 17 | 0   | 7   | -5.844270205 | 0.01729787 | 0.5958645  |
| ENSG00000259933 | AC009065.2  | NA                                                 | 2091436   | 2095433   | + | 105371049 | 16 | 1   | 15  | -3.770634598 | 0.00079462 | 0.10718826 |
| ENSG00000267260 | AC020928.1  | NA                                                 | 36773153  | 36777078  | + | NA        | 19 | 6   | 0   | 5.603454913  | 0.03361661 | 0.8324078  |
| ENSG00000225264 | ZNRF2P2     | NA                                                 | 29598795  | 29685255  | - | NA        | 7  | 6   | 0   | 5.603454913  | 0.03361661 | 0.8324078  |
| ENSG00000232712 | KIZ-AS1     | NA                                                 | 21154023  | 21218289  | - | 101929591 | 20 | 1   | 11  | -3.32747051  | 0.00788025 | 0.42560136 |
| ENSG00000282777 | POU2F2      | POU class 2 homeobox 2                             | 42086110  | 42196585  | - | 5452      | 19 | 754 | 309 | 1.26354698   | 3.33E-08   | 6.98E-05   |
| ENSG00000242510 | NDUFB4P1    | NA                                                 | 67513940  | 67514320  | + | NA        | 3  | 2   | 15  | -2.85369955  | 0.00339444 | 0.27265605 |
| ENSG00000278922 | AC002310.6  | NA                                                 | 30526918  | 30528294  | + | NA        | 16 | 9   | 1   | 2.998267012  | 0.02463495 | 0.74193929 |
| ENSG00000149596 | JPH2        | junctophilin 2                                     | 44111695  | 44187578  | - | 57158     | 20 | 15  | 4   | 1.85184114   | 0.02504257 | 0.74870021 |
| ENSG00000229635 | AL137159.1  | NA                                                 | 93384487  | 93384998  | - | NA        | 1  | 7   | 0   | 5.821602045  | 0.01729787 | 0.5958645  |
| ENSG00000276571 | AC002550.2  | NA                                                 | 19694035  | 19694428  | - | NA        | 16 | 0   | 7   | -5.844270205 | 0.01729787 | 0.5958645  |
| ENSG00000279058 | AGAP14P     | NA                                                 | 46337224  | 46358714  | + | NA        | 10 | 16  | 5   | 1.630973135  | 0.03470407 | 0.84532906 |
| ENSG00000228502 | EEF1A1P11   | NA                                                 | 96446930  | 96448318  | + | NA        | 1  | 12  | 1   | -3.451660612 | 0.00444385 | 0.30691904 |
| ENSG00000249855 | EEF1A1P19   | NA                                                 | 43495073  | 43496454  | - | NA        | 5  | 0   | 9   | -6.201249115 | 0.00464266 | 0.30691904 |
| ENSG00000266094 | RASSF5      | Ras association domain family member 5             | 206507530 | 206589448 | + | 83593     | 1  | 12  | 31  | -1.382996774 | 0.01141827 | 0.51219505 |
| ENSG00000251600 | AC139713.2  | NA                                                 | 143559457 | 144188367 | + | 101927636 | 4  | 3   | 15  | -2.297523269 | 0.0103193  | 0.47399509 |
| ENSG00000267272 | LINC01140   | NA                                                 | 87129765  | 87169198  | + | 339524    | 1  | 0   | 10  | -6.351290168 | 0.00242129 | 0.21443156 |
| ENSG00000099958 | DERL3       | derlin 3                                           | 23834503  | 23839128  | - | 91319     | 22 | 12  | 3   | 1.93356416   | 0.04197539 | 0.95430001 |
| ENSG00000280744 | LINC01173   | NA                                                 | 234682668 | 234717764 | + | 106144537 | 2  | 15  | 0   | 6.90746823   |            |            |

|                 |             |                                                                   |           |           |   |           |    |     |     |              |            |            |
|-----------------|-------------|-------------------------------------------------------------------|-----------|-----------|---|-----------|----|-----|-----|--------------|------------|------------|
| ENSG00000188396 | TCTEX1D4    | Tctex1 domain containing 4                                        | 44805913  | 44806675  | - | 343521    | 1  | 6   | 0   | 5.603454913  | 0.03361661 | 0.8324078  |
| ENSG00000182057 | OGFRP1      | NA                                                                | 42269753  | 42275196  | + | 388906    | 22 | 14  | 3   | 2.153813442  | 0.01657597 | 0.5958645  |
| ENSG00000280020 | AC116407.3  | NA                                                                | 32178946  | 32180074  | - | NA        | 17 | 8   | 0   | 6.011054937  | 0.00894141 | 0.44242407 |
| ENSG00000140675 | SLC5A2      | solute carrier family 5 member 2                                  | 31483002  | 31490860  | + | 6524      | 16 | 16  | 4   | 1.944199246  | 0.0161862  | 0.5958645  |
| ENSG00000260588 | AC027702.1  | NA                                                                | 41828165  | 41829934  | - | NA        | 8  | 22  | 4   | 2.400553291  | 0.00106861 | 0.13364727 |
| ENSG00000272156 | AC008280.3  | NA                                                                | 54082554  | 54085066  | + | NA        | 2  | 9   | 1   | 2.998267012  | 0.02463495 | 0.74193929 |
| ENSG00000241489 | AC244197.3  | novel transcript                                                  | 149482543 | 149533935 | - | NA        | X  | 7   | 0   | 5.821602045  | 0.01729787 | 0.5958645  |
| ENSG00000204531 | POU5F1      | POU class 5 homeobox 1                                            | 31164337  | 31180731  | - | 5460      | 6  | 0   | 6   | -5.626056987 | 0.03361661 | 0.8324078  |
| ENSG00000240970 | RPL23AP64   | NA                                                                | 119003012 | 119003446 | - | NA        | 11 | 16  | 3   | 2.344849074  | 0.00639309 | 0.38046285 |
| ENSG00000276404 | MIR6835     | NA                                                                | 34240673  | 34240736  | + | 102465502 | 6  | 9   | 0   | 6.178492236  | 0.00464266 | 0.30691904 |
| ENSG00000276334 | AL133243.2  | NA                                                                | 32521927  | 32523547  | + | NA        | 2  | 13  | 33  | -1.358522574 | 0.01030639 | 0.47399509 |
| ENSG00000214535 | RPS15AP1    | NA                                                                | 21166206  | 21166596  | - | NA        | 20 | 7   | 0   | 5.821602045  | 0.01729787 | 0.5958645  |
| ENSG00000160097 | FNDC5       | fibronectin type III domain containing 5                          | 32862268  | 32872482  | - | 252995    | 1  | 0   | 6   | -5.626056987 | 0.03361661 | 0.8324078  |
| ENSG00000276926 | MIR6797     | NA                                                                | 41869627  | 41869698  | + | 102465478 | 19 | 0   | 6   | -5.626056987 | 0.03361661 | 0.8324078  |
| ENSG00000172346 | CSDC2       | cold shock domain containing C2                                   | 41560763  | 41577741  | + | 27254     | 22 | 11  | 39  | -1.837191884 | 0.00043    | 0.07427378 |
| ENSG00000226833 | AC092164.1  | NA                                                                | 28708953  | 28736205  | - | 100505774 | 2  | 1   | 9   | -3.041533225 | 0.02463495 | 0.74193929 |
| ENSG00000223571 | DHRX-IT1    | NA                                                                | 2334295   | 2336410   | - | NA        | X  | 7   | 0   | 5.821602045  | 0.01729787 | 0.5958645  |
| ENSG00000109610 | SOD3        | superoxide dismutase 3                                            | 24789912  | 24800842  | + | 6649      | 4  | 26  | 63  | -1.295775345 | 0.00122608 | 0.14621903 |
| ENSG00000280062 | AL031719.1  | NA                                                                | 1530715   | 1533301   | + | NA        | 16 | 10  | 2   | 2.230135398  | 0.04430615 | 0.96117306 |
| ENSG00000177685 | CRACR2B     | calcium release activated channel regulator 2B                    | 826144    | 831991    | + | 283229    | 11 | 18  | 5   | 1.799645102  | 0.01534811 | 0.5958645  |
| ENSG00000137841 | PLCB2       | phospholipase C beta 2                                            | 40278176  | 40307935  | - | 5330      | 15 | 12  | 2   | 2.490174747  | 0.01608407 | 0.5958645  |
| ENSG00000277283 | AC004812.2  | NA                                                                | 120116907 | 120119000 | + | NA        | 12 | 18  | 53  | -1.574376179 | 0.00037825 | 0.06846609 |
| ENSG00000258422 | AL160191.1  | NA                                                                | 70187123  | 70230187  | + | NA        | 14 | 6   | 0   | 5.603454913  | 0.03361661 | 0.8324078  |
| ENSG00000181449 | SOX2        | SRY-box 2                                                         | 181711924 | 181714436 | + | 6657      | 3  | 7   | 0   | 5.821602045  | 0.01729787 | 0.5958645  |
| ENSG00000134532 | SOX5        | SRY-box 5                                                         | 23529500  | 23951032  | - | 6660      | 12 | 24  | 9   | 1.379777349  | 0.02192594 | 0.70005671 |
| ENSG00000260179 | AL162741.1  | NA                                                                | 1249777   | 1251334   | - | NA        | 1  | 6   | 0   | 5.603454913  | 0.03361661 | 0.8324078  |
| ENSG00000228839 | PIK3IP1-AS1 | NA                                                                | 31292499  | 31338021  | + | 101929760 | 22 | 1   | 10  | -3.191574278 | 0.01395124 | 0.57317426 |
| ENSG00000259672 | AC087612.1  | NA                                                                | 63098870  | 63110403  | + | NA        | 15 | 0   | 6   | -5.626056987 | 0.03361661 | 0.8324078  |
| ENSG00000267632 | AC067852.6  | NA                                                                | 42509784  | 42511519  | + | NA        | 17 | 3   | 14  | -2.198832243 | 0.01657597 | 0.5958645  |
| ENSG00000207295 | RNU6-851P   | NA                                                                | 38884560  | 38884666  | - | NA        | 2  | 0   | 8   | -6.033772917 | 0.00894141 | 0.44242407 |
| ENSG00000280231 | AL031719.2  | NA                                                                | 1553655   | 1554130   | - | NA        | 16 | 7   | 0   | 5.821602045  | 0.01729787 | 0.5958645  |
| ENSG00000259802 | AC012640.2  | NA                                                                | 10352701  | 10353601  | - | NA        | 5  | 14  | 4   | 1.753163615  | 0.03847433 | 0.90546426 |
| ENSG00000250790 | AC127070.3  | NA                                                                | 132911470 | 132914732 | + | NA        | 12 | 0   | 14  | -6.831659463 | 0.000187   | 0.04333935 |
| ENSG00000278949 | AC127070.5  | NA                                                                | 132865855 | 132867958 | - | NA        | 12 | 1   | 10  | -3.191574278 | 0.01395124 | 0.57317426 |
| ENSG00000254910 | AC136475.2  | NA                                                                | 310139    | 311141    | - | NA        | 11 | 7   | 19  | -1.447292991 | 0.03970312 | 0.92328994 |
| ENSG00000246228 | CASC8       | NA                                                                | 127289817 | 127482139 | - | 727677    | 8  | 51  | 25  | 1.001918003  | 0.01362799 | 0.57317426 |
| ENSG00000244556 | ODCP        | NA                                                                | 129028889 | 129030527 | + | NA        | 7  | 0   | 7   | -5.844270205 | 0.01729787 | 0.5958645  |
| ENSG00000132122 | SPATA6      | spermatogenesis associated 6                                      | 48295372  | 48472208  | - | 54558     | 1  | 87  | 180 | -1.070888157 | 0.00012458 | 0.03393208 |
| ENSG00000259370 | AC103740.1  | NA                                                                | 62827675  | 62884034  | - | 105370854 | 15 | 11  | 2   | 2.366006025  | 0.02678048 | 0.77212427 |
| ENSG00000280355 | AL132656.4  | NA                                                                | 79681973  | 79684094  | - | NA        | 10 | 41  | 17  | 1.240958023  | 0.00694453 | 0.39983963 |
| ENSG00000259562 | AC090607.2  | NA                                                                | 78290527  | 78291221  | - | NA        | 15 | 22  | 4   | 2.400553291  | 0.00106861 | 0.13364727 |
| ENSG00000280010 | AP001350.2  | NA                                                                | 58627435  | 58628528  | + | NA        | 11 | 16  | 4   | 1.944199246  | 0.0161862  | 0.5958645  |
| ENSG00000258520 | AL359317.1  | NA                                                                | 69239166  | 69260567  | - | NA        | 14 | 12  | 0   | 6.588541422  | 0.00066721 | 0.09763777 |
| ENSG00000273891 | AL731566.1  | NA                                                                | 121965764 | 121967700 | + | NA        | 10 | 10  | 1   | 3.148276849  | 0.01395124 | 0.57317426 |
| ENSG00000123338 | NCKAP1L     | NCK associated protein 1 like                                     | 54497711  | 54548238  | + | 3071      | 12 | 6   | 0   | 5.603454913  | 0.03361661 | 0.8324078  |
| ENSG00000100558 | PLEK2       | pleckstrin 2                                                      | 67386983  | 67412200  | - | 26499     | 14 | 38  | 17  | 1.131682441  | 0.01564512 | 0.5958645  |
| ENSG00000158428 | CATIP       | ciliogenesis associated TTC17 interacting protein                 | 218356856 | 218368099 | + | 375307    | 2  | 0   | 6   | -5.626056987 | 0.03361661 | 0.8324078  |
| ENSG00000203321 | C9orf41-AS1 | NA                                                                | 74952968  | 74996293  | + | NA        | 9  | 10  | 1   | 3.148276849  | 0.01395124 | 0.57317426 |
| ENSG00000174640 | SLCO2A1     | solute carrier organic anion transporter family member 2A1        | 133932696 | 134052184 | - | 80111     | 3  | 37  | 87  | -1.253713272 | 0.00034578 | 0.06443635 |
| ENSG00000091106 | NLRC4       | NLR family CARD domain containing 4                               | 32224453  | 32265854  | - | 58484     | 2  | 32  | 10  | 1.642888923  | 0.00254585 | 0.21987096 |
| ENSG00000270681 | AC095055.1  | NA                                                                | 151139991 | 151141103 | + | NA        | 4  | 0   | 7   | -5.844270205 | 0.01729787 | 0.5958645  |
| ENSG00000257740 | AC073896.3  | NA                                                                | 56308868  | 56309449  | + | NA        | 12 | 23  | 9   | 1.318704357  | 0.03063511 | 0.8324078  |
| ENSG00000278075 | AC114341.1  | NA                                                                | 79900555  | 79900903  | - | NA        | 18 | 20  | 0   | 7.319498185  | 4.54E-06   | 0.00317398 |
| ENSG00000235128 | AC013474.1  | NA                                                                | 126679622 | 126680420 | + | NA        | 2  | 6   | 0   | 5.603454913  | 0.03361661 | 0.8324078  |
| ENSG00000144671 | SLC22A14    | solute carrier family 22 member 14                                | 38282294  | 38318575  | + | 9389      | 3  | 13  | 1   | 3.522639813  | 0.00250381 | 0.21723364 |
| ENSG00000162711 | NLRP3       | NLR family pyrin domain containing 3                              | 247416156 | 247449108 | + | 114548    | 1  | 20  | 8   | 1.285725268  | 0.04895303 | 1          |
| ENSG00000270765 | GAS2L2      | growth arrest specific 2 like 2                                   | 35744511  | 35752878  | - | 246176    | 17 | 3   | 20  | -2.709600598 | 0.00091075 | 0.11726934 |
| ENSG00000227992 | AC108463.1  | NA                                                                | 111203964 | 111206215 | - | NA        | 2  | 30  | 14  | 1.069787395  | 0.03879354 | 0.90953385 |
| ENSG00000230499 | AC108463.2  | NA                                                                | 111195963 | 111206494 | + | NA        | 2  | 14  | 4   | 1.753163615  | 0.03847433 | 0.90546426 |
| ENSG00000271590 | AC108463.3  | NA                                                                | 111210995 | 111212476 | - | NA        | 2  | 28  | 11  | 1.315155718  | 0.01741971 | 0.59776732 |
| ENSG00000272505 | AC104964.3  | NA                                                                | 10486807  | 10489666  | + | NA        | 8  | 7   | 0   | 5.821602045  | 0.01729787 | 0.5958645  |
| ENSG00000235209 | AL022318.1  | NA                                                                | 38921227  | 38924708  | + | NA        | 22 | 6   | 0   | 5.603454913  | 0.03361661 | 0.8324078  |
| ENSG00000245248 | USP2-AS1    | NA                                                                | 119381778 | 119526664 | + | NA        | 11 | 0   | 12  | -6.611376502 | 0.00066721 | 0.09763777 |
| ENSG00000115657 | ABCB6       | ATP binding cassette subfamily B member 6 (Langereis blood group) | 219209768 | 219218990 | - | 10058     | 2  | 22  | 9   | 1.254931265  | 0.04253884 | 0.95821355 |
| ENSG00000005471 | ABCB4       | ATP binding cassette subfamily B member 4                         | 87401697  | 87480435  | - | 5244      | 7  | 0   | 14  | -6.831659463 | 0.000187   | 0.04333935 |
| ENSG00000260231 | JHDM1D-AS1  | NA                                                                | 140177261 | 140179640 | + | 100134229 | 7  | 18  | 38  | -1.0957119   | 0.02339332 | 0.72981751 |
| ENSG00000229598 | PRDX3P1     | NA                                                                | 38722743  | 38723505  | - | NA        | 22 | 11  | 1   | 3.284147477  | 0.00788025 | 0.42560136 |
| ENSG00000121769 | FABP3       | fatty acid binding protein 3                                      | 31365625  | 31376850  | - | 2170      | 1  | 114 | 250 | -1.155088941 | 1.06E-05   | 0.00579208 |
| ENSG00000170323 | FABP4       | fatty acid binding protein 4                                      | 81478419  | 81483263  | - | 2167      | 8  | 28  | 76  | -1.459519953 | 9.99E-05   | 0.02829695 |
| ENSG00000232536 | AL365436.2  | NA                                                                | 151540516 | 151561855 | + | NA        | 1  | 0   | 8   | -6.033772917 | 0.00894141 | 0.44242407 |
| ENSG00000258384 | AC068831.2  | NA                                                                | 90952239  | 90955225  | - | NA        | 15 | 1   | 8   | -2.874057027 | 0.04333145 | 0.95821355 |
| ENSG00000136449 | MYCBPAP     | MYCBP associated protein                                          | 50508384  | 50531501  | + | 84073     | 17 | 7   | 0   | 5.821602045  | 0.01729787 | 0.5958645  |
| ENSG00000037280 | FLT4        | fms related tyrosine kinase 4                                     | 180601506 | 180649624 | - | 2324      | 5  | 9   | 0   | 6.178492236  | 0.00464266 | 0.30691904 |
| ENSG00000272579 | AL136370.1  | NA                                                                | 193090866 | 193091556 | - | NA        | 1  | 23  | 46  | -1.019074865 | 0.02115784 | 0.68177571 |
| ENSG00000276529 | AP001505.2  | NA                                                                | 44978832  | 44979274  | + | NA        | 21 | 35  | 8   | 2.089204112  | 0.00018469 | 0.04333935 |
| ENSG00000113532 | ST8SIA4     | ST8 alpha-N-acetylneuraminidase alpha-2,8-sialyltransferase 4     | 100806935 | 100903266 | - | 7903      | 5  | 17  | 39  | -1.214938643 | 0.01197492 | 0.53210919 |
| ENSG00000175899 |             |                                                                   |           |           |   |           |    |     |     |              |            |            |



|                 |            |                                                        |           |           |   |           |    |      |      |              |            |            |
|-----------------|------------|--------------------------------------------------------|-----------|-----------|---|-----------|----|------|------|--------------|------------|------------|
| ENSG00000160396 | HIPK4      | homeodomain interacting protein kinase 4               | 40379271  | 40390187  | - | 147746    | 19 | 0    | 6    | -5.626056987 | 0.03361661 | 0.8324078  |
| ENSG00000104879 | CKM        | creatine kinase, M-type                                | 45306414  | 45322977  | - | 1158      | 19 | 8    | 0    | 6.011054937  | 0.00894141 | 0.44242407 |
| ENSG00000123689 | GOS2       | G0/G1 switch 2                                         | 209675420 | 209676388 | + | 50486     | 1  | 3596 | 1398 | 1.33987831   | 2.66E-10   | 8.38E-07   |
| ENSG00000125740 | FOSB       | FosB proto-oncogene, AP-1 transcription factor subunit | 45467995  | 45475179  | + | 2354      | 19 | 25   | 1    | 4.459393515  | 2.75E-06   | 0.00240045 |
| ENSG00000186193 | SAPCD2     | suppressor APC domain containing 2                     | 137062124 | 137070588 | - | 89958     | 9  | 16   | 35   | -1.146141525 | 0.02294735 | 0.72307126 |
| ENSG00000263823 | AC009831.1 | NA                                                     | 31942575  | 31944156  | + | NA        | 18 | 13   | 2    | 2.604498362  | 0.00961124 | 0.45874658 |
| ENSG00000227210 | AC079145.1 | NA                                                     | 19990217  | 20004210  | + | NA        | 2  | 1    | 10   | -3.191574278 | 0.01395124 | 0.57317426 |
| ENSG00000215790 | SLC35E2    | solute carrier family 35 member E2A                    | 1724838   | 1745992   | - | 9906      | 1  | 31   | 9    | 1.747308802  | 0.0018476  | 0.18493969 |
| ENSG00000214820 | MPRIIP1    | NA                                                     | 44579938  | 44581026  | - | NA        | 3  | 11   | 1    | 3.284147477  | 0.00788025 | 0.42560136 |
| ENSG00000279713 | AC080038.3 | NA                                                     | 62679403  | 62681354  | - | NA        | 17 | 18   | 6    | 1.542441316  | 0.0310526  | 0.8324078  |
| ENSG00000140839 | CLEC18B    | C-type lectin domain family 18 member B                | 74408270  | 74421953  | - | 497190    | 16 | 0    | 16   | -7.02272042  | 5.33E-05   | 0.0193511  |
| ENSG00000187323 | DCC        | DCC netrin 1 receptor                                  | 52340172  | 53535903  | + | 1630      | 18 | 143  | 69   | 1.026954209  | 0.0005575  | 0.08847317 |
| ENSG00000237892 | KLF7-IT1   | NA                                                     | 207120884 | 207122044 | - | NA        | 2  | 24   | 10   | 1.229736296  | 0.03709785 | 0.88907718 |
| ENSG00000131044 | TTL9       | tubulin tyrosine ligase like 9                         | 31870702  | 31944963  | + | 164395    | 20 | 6    | 0    | 5.603454913  | 0.03361661 | 0.8324078  |
| ENSG00000280254 | AC233723.2 | NA                                                     | 4787057   | 4789162   | + | NA        | 17 | 4    | 18   | -2.158158808 | 0.00664724 | 0.38704964 |
| ENSG00000226393 | IFNA20P    | NA                                                     | 21321300  | 21321827  | + | NA        | 9  | 7    | 0    | 5.821602045  | 0.01729787 | 0.5958645  |
| ENSG00000198569 | SLC34A3    | solute carrier family 34 member 3                      | 137230757 | 137236554 | + | 142680    | 9  | 6    | 0    | 5.603454913  | 0.03361661 | 0.8324078  |
| ENSG00000115257 | PCSK4      | proprotein convertase subtilisin/kexin type 4          | 1481428   | 1490752   | - | 54760     | 19 | 16   | 46   | -1.539202002 | 0.00099317 | 0.12655611 |
| ENSG00000266877 | AC007923.4 | NA                                                     | 31583162  | 31637543  | + | NA        | 17 | 0    | 8    | -6.033772917 | 0.00894141 | 0.44242407 |
| ENSG00000259275 | AC087477.2 | NA                                                     | 96354237  | 96403803  | + | NA        | 15 | 22   | 48   | -1.144086886 | 0.00921389 | 0.44713426 |
| ENSG00000123612 | ACVR1C     | activin A receptor type 1C                             | 157526767 | 157629005 | - | 130399    | 2  | 16   | 2    | 2.90145966   | 0.00200946 | 0.19394578 |
| ENSG00000100842 | EFS        | embryonal Fyn-associated substrate                     | 23356402  | 23365752  | - | 10278     | 14 | 16   | 47   | -1.570146372 | 0.00073512 | 0.10360291 |
| ENSG00000135373 | EHF        | ETS homologous factor                                  | 34621093  | 34661057  | + | 26298     | 11 | 103  | 19   | 2.407878912  | 3.18E-10   | 9.49E-07   |
| ENSG00000266967 | AARSD1     | alanyl-tRNA synthetase domain containing 1             | 42950526  | 42964498  | - | 80755     | 17 | 17   | 5    | 1.717772741  | 0.02315658 | 0.72522737 |
| ENSG00000242198 | AC008897.1 | NA                                                     | 75374463  | 75374809  | + | NA        | 5  | 12   | 1    | 3.408316198  | 0.00444385 | 0.30691904 |
| ENSG00000174326 | SLC16A11   | solute carrier family 16 member 11                     | 7041630   | 7043923   | - | 162515    | 17 | 13   | 0    | 6.702865037  | 0.00035249 | 0.06443635 |
| ENSG00000049540 | ELN        | elastin                                                | 74027789  | 74069907  | + | 2006      | 7  | 15   | 72   | -2.27652188  | 1.24E-07   | 0.00020615 |
| ENSG00000184441 | AP001062.1 | NA                                                     | 44331234  | 44335851  | + | NA        | 21 | 16   | 2    | 2.90145966   | 0.00200946 | 0.19394578 |
| ENSG00000157554 | ERG        | ERG, ETS transcription factor                          | 38380027  | 38661780  | - | 2078      | 21 | 16   | 4    | 1.944199246  | 0.0161862  | 0.5958645  |
| ENSG00000204745 | AC083899.1 | NA                                                     | 87125390  | 87196647  | + | NA        | 2  | 14   | 31   | -1.162747492 | 0.02943072 | 0.82585301 |
| ENSG00000133134 | BEX2       | brain expressed X-linked 2                             | 103309346 | 103311046 | - | 84707     | X  | 32   | 10   | 1.642888923  | 0.00254585 | 0.21987096 |
| ENSG00000235903 | CPB2-AS1   | NA                                                     | 46052806  | 46113332  | + | 100509894 | 13 | 7    | 0    | 5.821602045  | 0.01729787 | 0.5958645  |
| ENSG00000271225 | BNIP3P4    | NA                                                     | 64810865  | 64811429  | + | NA        | 9  | 7    | 0    | 5.821602045  | 0.01729787 | 0.5958645  |
| ENSG00000106013 | ANKRD7     | ankyrin repeat domain 7                                | 118214669 | 118496171 | + | 56311     | 7  | 1    | 9    | -3.041533225 | 0.02463495 | 0.74193929 |
| ENSG00000167604 | NFKBID     | NFKB inhibitor delta                                   | 35887653  | 35902303  | - | 84807     | 19 | 13   | 45   | -1.804540628 | 0.00021875 | 0.04859947 |
| ENSG00000143333 | RGS16      | regulator of G protein signaling 16                    | 182598623 | 182604408 | - | 6004      | 1  | 18   | 0    | 7.168498303  | 1.54E-05   | 0.00773539 |
| ENSG00000076344 | RGS11      | regulator of G protein signaling 11                    | 268301    | 275980    | - | 8786      | 16 | 1    | 17   | -3.94981458  | 0.00025279 | 0.0532408  |
| ENSG00000284731 | AC083906.6 | NA                                                     | 130002789 | 130003007 | - | NA        | 3  | 10   | 0    | 6.328502073  | 0.00242129 | 0.21443156 |
| ENSG00000272720 | AL022322.1 | NA                                                     | 38090127  | 38091559  | + | NA        | 22 | 7    | 28   | -2.003710468 | 0.00128011 | 0.14621903 |
| ENSG00000218537 | MIF-AS1    | NA                                                     | 23894426  | 23898930  | - | NA        | 22 | 0    | 10   | -6.351290168 | 0.00242129 | 0.21443156 |
| ENSG00000250909 | AC138956.1 | NA                                                     | 176347941 | 176353584 | + | NA        | 5  | 10   | 1    | 3.148276849  | 0.01395124 | 0.57317426 |
| ENSG00000271452 | AC005034.5 | NA                                                     | 75669989  | 75670454  | + | NA        | 2  | 0    | 9    | -6.201249115 | 0.00464266 | 0.30691904 |
| ENSG00000198312 | BMS1P9     | NA                                                     | 63055641  | 63059217  | + | NA        | 9  | 8    | 0    | 6.011054937  | 0.00894141 | 0.44242407 |
| ENSG00000270025 | BMS1P7     | NA                                                     | 48050282  | 48060016  | - | NA        | 10 | 10   | 0    | 6.328502073  | 0.00242129 | 0.21443156 |
| ENSG00000157152 | SYN2       | synapsin II                                            | 12004402  | 12191400  | + | 6854      | 3  | 13   | 28   | -1.122447476 | 0.04444927 | 0.6117306  |
| ENSG00000119125 | GDA        | guanine deaminase                                      | 72114595  | 72257193  | + | 9615      | 9  | 69   | 30   | 1.175242124  | 0.00149312 | 0.15991045 |
| ENSG00000248564 | AC079140.1 | NA                                                     | 338097    | 338583    | - | NA        | 4  | 6    | 0    | 5.603454913  | 0.03361661 | 0.8324078  |
| ENSG00000241370 | RPP21      | ribonuclease P/MRP subunit p21                         | 30345131  | 30346884  | + | 79897     | 6  | 7    | 30   | -2.102822017 | 0.00057344 | 0.08974658 |
| ENSG00000171772 | SYCE1      | synaptonemal complex central element protein 1         | 133553901 | 133569835 | - | 93426     | 10 | 0    | 6    | -5.626056987 | 0.03361661 | 0.8324078  |
| ENSG00000254166 | CASC19     | NA                                                     | 127072694 | 127227541 | - | 103164619 | 8  | 20   | 5    | 1.950644984  | 0.00662995 | 0.38704964 |
| ENSG00000272168 | CASC15     | NA                                                     | 21664772  | 22368328  | + | NA        | 6  | 19   | 0    | 7.245972896  | 8.35E-06   | 0.00498038 |
| ENSG00000233509 | ZNF197-AS1 | NA                                                     | 44617128  | 44624797  | - | 100874094 | 3  | 6    | 0    | 5.603454913  | 0.03361661 | 0.8324078  |
| ENSG00000278987 | AL031009.1 | NA                                                     | 1688355   | 1690536   | + | NA        | 16 | 34   | 14   | 1.249649589  | 0.01249671 | 0.54336246 |
| ENSG00000160282 | FTCD       | formimidoyltransferase cyclodeaminase                  | 46136262  | 46155567  | - | 10841     | 21 | 45   | 21   | 1.07200287   | 0.01301803 | 0.55621169 |
| ENSG00000245685 | FRG1-DT    | NA                                                     | 189780336 | 189940271 | - | NA        | 4  | 0    | 8    | -6.033772917 | 0.00894141 | 0.44242407 |
| ENSG00000276116 | FUT8-AS1   | NA                                                     | 65411170  | 65412690  | - | NA        | 14 | 2    | 14   | -2.755008525 | 0.00572059 | 0.35537281 |
| ENSG00000189423 | USP32P3    | NA                                                     | 20415547  | 20431008  | + | NA        | 17 | 13   | 0    | 6.702865037  | 0.00035249 | 0.06443635 |
| ENSG00000176912 | TYMSOS     | NA                                                     | 641320    | 658340    | - | NA        | 18 | 1    | 9    | -3.041533225 | 0.02463495 | 0.74193929 |
| ENSG00000135063 | FAM189A2   | family with sequence similarity 189 member A2          | 69324572  | 69392455  | + | 9413      | 9  | 7    | 20   | -1.520825773 | 0.0276789  | 0.78920399 |
| ENSG00000104059 | FAM189A1   | family with sequence similarity 189 member A1          | 29120254  | 29570723  | - | 23359     | 15 | 10   | 1    | 3.148276849  | 0.01395124 | 0.57317426 |
| ENSG00000280083 | AC079777.1 | NA                                                     | 191154118 | 191156070 | - | NA        | 2  | 8    | 0    | 6.011054937  | 0.00894141 | 0.44242407 |
| ENSG00000256060 | TRAPPC2B   | trafficking protein particle complex 2B                | 57363511  | 57365353  | + | 10597     | 19 | 27   | 54   | -1.019665118 | 0.01381579 | 0.57317426 |
| ENSG00000245105 | A2M-AS1    | NA                                                     | 9065177   | 9068060   | - | 144571    | 12 | 0    | 11   | -6.4871864   | 0.00126829 | 0.14621903 |
| ENSG00000262903 | AC027796.4 | NA                                                     | 3655621   | 3658092   | - | NA        | 17 | 3    | 17   | -2.47670325  | 0.00394482 | 0.29823018 |
| ENSG00000261662 | AL359752.1 | NA                                                     | 119909255 | 119910613 | - | NA        | 1  | 10   | 33   | -1.732885538 | 0.00179023 | 0.18307847 |
| ENSG00000262924 | AC008894.2 | NA                                                     | 16123661  | 16139892  | - | NA        | 19 | 2    | 10   | -2.27463923  | 0.04430615 | 0.96117306 |
| ENSG00000219607 | PPP1R3G    | protein phosphatase 1 regulatory subunit 3G            | 5084581   | 5089487   | + | 648791    | 6  | 36   | 73   | -1.040380435 | 0.00410751 | 0.30691904 |
| ENSG00000162148 | PPP1R32    | protein phosphatase 1 regulatory subunit 32            | 61481120  | 61490931  | + | 220004    | 11 | 7    | 0    | 5.821602045  | 0.01729787 | 0.5958645  |
| ENSG00000180071 | ANKRD18A   | ankyrin repeat domain 18A                              | 38571358  | 38620660  | - | 253650    | 9  | 8    | 1    | 2.830829713  | 0.04333145 | 0.95821355 |
| ENSG00000237749 | AL034379.1 | NA                                                     | 37556247  | 37556499  | + | NA        | 1  | 6    | 0    | 5.603454913  | 0.03361661 | 0.8324078  |
| ENSG00000135604 | STX11      | syntaxin 11                                            | 144150526 | 144188370 | + | 8676      | 6  | 21   | 2    | 3.291090676  | 0.0001437  | 0.03734573 |
| ENSG00000239462 | AC091212.1 | NA                                                     | 98902424  | 99018562  | + | NA        | 3  | 10   | 2    | 2.230135398  | 0.04430615 | 0.96117306 |
| ENSG00000155980 | KIF5A      | kinesin family member 5A                               | 57549998  | 57586632  | + | 3798      | 12 | 16   | 4    | 1.944199246  | 0.0161862  | 0.5958645  |
| ENSG00000279342 | AP000866.6 | NA                                                     | 124789240 | 124792818 | - | NA        | 11 | 29   | 11   | 1.365558911  | 0.01266414 | 0.54624477 |
| ENSG00000174951 | FUT1       | fucosyltransferase 1 (H blood group)                   | 48748011  | 48755390  | - | 2523      | 19 | 7    | 0    | 5.821602045  | 0.01729787 | 0.5958645  |
| ENSG00000204173 | LRRC37A5P  | NA                                                     | 111602831 | 111631289 | - | 652972    | 9  | 6    | 17   | -1.506075556 | 0.0452806  | 0.97505595 |
| ENSG00000136244 |            |                                                        |           |           |   |           |    |      |      |              |            |            |

|                 |             |                                                                               |           |           |   |           |    |      |     |              |            |            |
|-----------------|-------------|-------------------------------------------------------------------------------|-----------|-----------|---|-----------|----|------|-----|--------------|------------|------------|
| ENSG00000187775 | DNAH17      | dynein axonemal heavy chain 17                                                | 78423697  | 78577394  | - | 8632      | 17 | 41   | 17  | 1.240958023  | 0.00694453 | 0.39983963 |
| ENSG00000283267 | FAM237B     | family with sequence similarity 237 member B                                  | 90316503  | 90321308  | - | NA        | 7  | 0    | 7   | -5.844270205 | 0.01729787 | 0.5958645  |
| ENSG00000270020 | AC009108.3  | NA                                                                            | 86520383  | 86523897  | - | NA        | 16 | 3    | 14  | -2.198832243 | 0.01657597 | 0.5958645  |
| ENSG00000213261 | EEF1B2P6    | NA                                                                            | 131661952 | 131662624 | - | NA        | 7  | 15   | 1   | 3.727243006  | 0.00079462 | 0.10718826 |
| ENSG00000183691 | NOG         | noggin                                                                        | 56593699  | 56595590  | + | 9241      | 17 | 100  | 46  | 1.095154152  | 0.00083279 | 0.11101532 |
| ENSG00000183010 | SPNS2       | sphingolipid transporter 2                                                    | 4498838   | 4539035   | + | 124976    | 17 | 7    | 0   | 5.821602045  | 0.01729787 | 0.5958645  |
| ENSG00000212242 | RNA5SP219   | NA                                                                            | 136630243 | 136630355 | + | NA        | 6  | 0    | 9   | -6.201249115 | 0.00464266 | 0.30691904 |
| ENSG00000253559 | OSGEPL1-AS1 | NA                                                                            | 189762704 | 189765556 | + | NA        | 2  | 11   | 2   | 2.366006025  | 0.02678048 | 0.77212427 |
| ENSG00000124875 | CXCL6       | C-X-C motif chemokine ligand 6                                                | 73836497  | 73849064  | + | 6372      | 4  | 90   | 37  | 1.256518232  | 0.00028126 | 0.05673573 |
| ENSG00000169429 | CXCL8       | C-X-C motif chemokine ligand 8                                                | 73740506  | 73743716  | + | 3576      | 4  | 1076 | 225 | 2.233982292  | 1.70E-21   | 4.83E-17   |
| ENSG00000163431 | LMOD1       | leiomodrin 1                                                                  | 201896452 | 201946588 | - | 25802     | 1  | 18   | 83  | -2.220277475 | 3.17E-08   | 6.91E-05   |
| ENSG00000163739 | CXCL1       | C-X-C motif chemokine ligand 1                                                | 73869393  | 73871242  | + | 2919      | 4  | 436  | 120 | 1.837147632  | 3.63E-13   | 2.28E-09   |
| ENSG00000163734 | CXCL3       | C-X-C motif chemokine ligand 3                                                | 74036589  | 74038807  | - | 2921      | 4  | 25   | 2   | 3.541252064  | 1.74E-05   | 0.00851439 |
| ENSG00000163735 | CXCL5       | C-X-C motif chemokine ligand 5                                                | 73995642  | 73998779  | - | 6374      | 4  | 166  | 58  | 1.491999033  | 6.18E-07   | 0.0007781  |
| ENSG00000202474 | RNA5SP283   | NA                                                                            | 62802320  | 62802438  | - | NA        | 9  | 17   | 6   | 1.460568955  | 0.0452806  | 0.97505595 |
| ENSG00000239908 | RN7SL75P    | NA                                                                            | 100102559 | 100102839 | + | NA        | 9  | 0    | 6   | -5.626056987 | 0.03361661 | 0.8324078  |
| ENSG00000272017 | AL137784.2  | NA                                                                            | 99568097  | 99569096  | + | NA        | 6  | 6    | 0   | 5.603454913  | 0.03361661 | 0.8324078  |
| ENSG00000267213 | AC007773.1  | NA                                                                            | 32390050  | 32405560  | - | 400684    | 19 | 8    | 21  | -1.401338831 | 0.03484493 | 0.84532906 |
| ENSG00000166153 | DEPDC4      | DEP domain containing 4                                                       | 100203669 | 100267079 | - | 120863    | 12 | 17   | 4   | 2.030998852  | 0.01039936 | 0.47399509 |
| ENSG00000217416 | ISCA1P1     | NA                                                                            | 62776877  | 62777263  | - | NA        | 5  | 6    | 24  | -2.000524945 | 0.00285251 | 0.23661633 |
| ENSG00000241568 | RN7SL338P   | NA                                                                            | 35049271  | 35049563  | + | NA        | 9  | 0    | 6   | -5.626056987 | 0.03361661 | 0.8324078  |
| ENSG00000064886 | CH13L2      | chitinase 3 like 2                                                            | 111200771 | 111243440 | + | 1117      | 1  | 23   | 8   | 1.486180555  | 0.01731168 | 0.5958645  |
| ENSG00000133048 | CH13L1      | chitinase 3 like 1                                                            | 203178931 | 203186749 | - | 1116      | 1  | 79   | 305 | -1.97024488  | 3.52E-13   | 2.28E-09   |
| ENSG00000167524 | SGK494      | uncharacterized serine/threonine-protein kinase Sgk494                        | 28607964  | 28614200  | - | 124923    | 17 | 36   | 17  | 1.053944785  | 0.02640494 | 0.77212427 |
| ENSG00000234546 | LINC01759   | NA                                                                            | 9182004   | 9196284   | + | 102724571 | 1  | 15   | 39  | -1.394096355 | 0.00470459 | 0.31023948 |
| ENSG00000151834 | GABRA2      | gamma-aminobutyric acid type A receptor alpha2 subunit                        | 46248427  | 46475230  | - | 2555      | 4  | 37   | 6   | 2.576810631  | 1.15E-05   | 0.00615558 |
| ENSG00000186297 | GABRA5      | gamma-aminobutyric acid type A receptor alpha5 subunit                        | 26866363  | 26949207  | + | 2558      | 15 | 0    | 8   | -6.033772917 | 0.00894141 | 0.44242407 |
| ENSG00000025434 | NR1H3       | nuclear receptor subfamily 1 group H member 3                                 | 47248300  | 47269032  | + | 10062     | 11 | 95   | 235 | -1.328583138 | 7.69E-07   | 0.00090737 |
| ENSG00000275464 | FP565260.1  | periodic tryptophan protein 2 homolog                                         | 5130871   | 5154734   | - | 102724159 | 21 | 34   | 11  | 1.594122653  | 0.00242152 | 0.21443156 |
| ENSG00000277117 | FP565260.3  | Homo sapiens ICOS ligand (LOC102723996), mRNA.                                | 5022493   | 5040666   | + | 102723996 | 21 | 12   | 1   | 3.408316198  | 0.00444385 | 0.30691904 |
| ENSG00000260647 | AC127537.3  | NA                                                                            | 18268080  | 18268828  | + | NA        | 17 | 7    | 0   | 5.821602045  | 0.01729787 | 0.5958645  |
| ENSG00000163666 | HESX1       | HESX homeobox 1                                                               | 57197843  | 57226521  | - | 8820      | 3  | 4    | 15  | -1.897097174 | 0.02504257 | 0.74870021 |
| ENSG00000127578 | WFIKKN1     | WAP, follistatin/kazal, immunoglobulin, kunitz and netrin domain containing 1 | 629239    | 634116    | + | 117166    | 16 | 7    | 0   | 5.821602045  | 0.01729787 | 0.5958645  |
| ENSG00000152082 | MZT2B       | mitotic spindle organizing protein 2B                                         | 130181737 | 130190729 | + | 80097     | 2  | 30   | 63  | -1.09025247  | 0.00549808 | 0.34920796 |
| ENSG00000144285 | SCN1A       | sodium voltage-gated channel alpha subunit 1                                  | 165984641 | 166149214 | - | 6323      | 2  | 18   | 60  | -1.752953392 | 4.78E-05   | 0.01913526 |
| ENSG00000166257 | SCN3B       | sodium voltage-gated channel beta subunit 3                                   | 123629187 | 123655244 | - | 55800     | 11 | 15   | 1   | 3.727243006  | 0.00079462 | 0.10718826 |
| ENSG00000153253 | SCN3A       | sodium voltage-gated channel alpha subunit 3                                  | 165087522 | 165204067 | - | 6328      | 2  | 9    | 0   | 6.178492236  | 0.00464266 | 0.30691904 |
| ENSG00000272235 | AL590438.1  | NA                                                                            | 3306636   | 3310096   | - | NA        | 1  | 8    | 0   | 6.011054937  | 0.00894141 | 0.44242407 |
| ENSG00000080573 | COL5A3      | collagen type V alpha 3 chain                                                 | 9959561   | 10010471  | - | 50509     | 19 | 285  | 122 | 1.200179905  | 3.19E-06   | 0.00254447 |
| ENSG00000225806 | AL121917.1  | NA                                                                            | 58863528  | 58888809  | - | NA        | 20 | 11   | 2   | 2.366006025  | 0.02678048 | 0.77212427 |
| ENSG00000140379 | BCL2A1      | BCL2 related protein A1                                                       | 79960889  | 79971446  | - | 597       | 15 | 11   | 2   | 2.366006025  | 0.02678048 | 0.77212427 |
| ENSG00000244218 | RN7SL81P    | NA                                                                            | 128761338 | 128761598 | + | NA        | 7  | 19   | 4   | 2.190345806  | 0.00423033 | 0.30691904 |
| ENSG00000143839 | REN         | renin                                                                         | 204154819 | 204190324 | - | 5972      | 1  | 3    | 33  | -2.050332673 | 0.00040416 | 0.07164054 |
| ENSG00000187010 | RHD         | Rh blood group D antigen                                                      | 25272393  | 25330445  | + | 6007      | 1  | 25   | 59  | -1.25763584  | 0.00212386 | 0.2022303  |
| ENSG00000115468 | EFHD1       | EF-hand domain family member D1                                               | 232606057 | 232682781 | + | 80303     | 2  | 12   | 29  | -1.287177805 | 0.02111849 | 0.68177571 |
| ENSG00000258789 | AL162171.1  | NA                                                                            | 88551597  | 88552493  | + | NA        | 14 | 8    | 1   | 2.830829713  | 0.04333145 | 0.95821355 |
| ENSG00000154274 | C4orf19     | chromosome 4 open reading frame 19                                            | 37453941  | 37623495  | + | 55286     | 4  | 6    | 0   | 5.603454913  | 0.03361661 | 0.8324078  |
| ENSG00000223855 | HRAT92      | NA                                                                            | 520391    | 525232    | + | 441307    | 7  | 2    | 15  | -2.85369955  | 0.00339444 | 0.27265605 |
| ENSG00000180245 | RRH         | retinal pigment epithelium-derived rhodopsin homolog                          | 109827994 | 109844604 | + | 10692     | 4  | 0    | 10  | -6.351290168 | 0.00242129 | 0.21443156 |
| ENSG00000127152 | BCL11B      | B cell CLL/lymphoma 11B                                                       | 99169287  | 99271524  | - | 64919     | 14 | 38   | 14  | 1.409553447  | 0.00377845 | 0.29183059 |
| ENSG00000266217 | CTSLP2      | NA                                                                            | 47581211  | 47582321  | - | NA        | 10 | 1    | 8   | -2.874057027 | 0.04333145 | 0.95821355 |
| ENSG00000280913 | CTSLP2      | NA                                                                            | 46753605  | 46759740  | + | NA        | 10 | 1    | 8   | -2.874057027 | 0.04333145 | 0.95821355 |
| ENSG00000158089 | GALNT14     | polypeptide N-acetylgalactosaminyltransferase 14                              | 30910467  | 31155202  | - | 79623     | 2  | 18   | 0   | 7.168498303  | 1.54E-05   | 0.00773539 |
| ENSG00000169031 | COL4A3      | collagen type IV alpha 3 chain                                                | 227164565 | 227314792 | + | 1285      | 2  | 17   | 5   | 1.717772741  | 0.02315658 | 0.72522737 |
| ENSG00000123358 | NR4A1       | nuclear receptor subfamily 4 group A member 1                                 | 52022832  | 52059507  | + | 3164      | 12 | 161  | 71  | 1.15670799   | 7.23E-05   | 0.0239478  |
| ENSG00000172650 | AGAP5       | ArfGAP with GTPase domain, ankyrin repeat and PH domain 5                     | 73674285  | 73698159  | - | 729092    | 10 | 10   | 0   | 6.328502073  | 0.00242129 | 0.21443156 |
| ENSG00000260000 | AL133338.1  | NA                                                                            | 100881471 | 100882987 | + | NA        | 6  | 44   | 12  | 1.840690206  | 0.00015341 | 0.03862803 |
| ENSG00000138316 | ADAMTS14    | ADAM metalloproteinase with thrombospondin type 1 motif 14                    | 70672803  | 70762441  | + | 140766    | 10 | 87   | 40  | 1.095564909  | 0.00143045 | 0.15585003 |
| ENSG00000145808 | ADAMTS19    | ADAM metalloproteinase with thrombospondin type 1 motif 19                    | 129460265 | 129738683 | + | 171019    | 5  | 2    | 14  | -2.755008525 | 0.00572059 | 0.35537281 |
| ENSG00000175793 | SFN         | stratifin                                                                     | 26863138  | 26864457  | + | 2810      | 1  | 0    | 7   | -5.844270205 | 0.01729787 | 0.5958645  |
| ENSG00000261253 | AC137932.2  | NA                                                                            | 89321133  | 89325110  | + | NA        | 16 | 4    | 18  | -2.158158808 | 0.00664724 | 0.38704964 |
| ENSG00000166670 | MMP10       | matrix metalloproteinase 10                                                   | 102770503 | 102780628 | - | 4319      | 11 | 11   | 1   | 3.284147477  | 0.00788025 | 0.42560136 |
| ENSG00000283828 | AL137002.2  | NA                                                                            | 113149432 | 113154002 | - | NA        | 13 | 4    | 17  | -2.076277155 | 0.01039936 | 0.47399509 |
| ENSG00000251320 | AC011352.3  | NA                                                                            | 147887112 | 147887704 | + | NA        | 5  | 11   | 25  | -1.19820419  | 0.04395748 | 0.96117306 |
| ENSG00000155926 | SLA         | Src like adaptor                                                              | 133036724 | 133103054 | - | 6503      | 8  | 17   | 6   | 1.460568955  | 0.0452806  | 0.97505595 |
| ENSG00000271826 | PLS3-AS1    | NA                                                                            | 115518182 | 115562731 | - | 101927352 | X  | 0    | 7   | -5.844270205 | 0.01729787 | 0.5958645  |
| ENSG00000205238 | SPDYE2      | speedy/RINGO cell cycle regulator family member E2                            | 102551232 | 102562308 | + | 441273    | 7  | 26   | 11  | 1.208737584  | 0.03246835 | 0.8324078  |
| ENSG00000136206 | SPDYE1      | speedy/RINGO cell cycle regulator family member E1                            | 44000889  | 44010122  | + | 285955    | 7  | 13   | 3   | 2.047887775  | 0.0264707  | 0.77212427 |
| ENSG00000134548 | SPX         | spexin hormone                                                                | 21526307  | 21537377  | + | 80763     | 12 | 135  | 57  | 1.219063428  | 7.80E-05   | 0.02481651 |
| ENSG00000267454 | ZNF582-AS1  | NA                                                                            | 56393656  | 56399172  | + | 386758    | 19 | 3    | 12  | -1.978549282 | 0.04197539 | 0.95430001 |
| ENSG00000274372 | AC239803.3  | NA                                                                            | 148021850 | 148025931 | + | NA        | 1  | 0    | 8   | -6.033772917 | 0.00894141 | 0.44242407 |
| ENSG00000102003 | SYP         | synaptophysin                                                                 | 49187804  | 49200259  | - | 6855      | X  | 15   | 0   | 6.90746823   | 9.96E-05   | 0.02829695 |
| ENSG00000149970 | CNKSR2      | connector enhancer of kinase suppressor of Ras 2                              | 21374418  | 21654695  | + | 22866     | X  | 8    | 21  | -1.401338831 | 0.03484493 | 0.84532906 |
| ENSG00000163810 | TGM4        | transglutaminase 4                                                            | 44874608  | 44914990  | + | 7047      | 3  | 13   | 2   | 2.604498362  | 0.00961124 | 0.45874658 |
| ENSG00000184347 | SLIT3       | slit guidance ligand 3                                                        | 168661733 | 169301129 | - | 6586      | 5  | 4    | 25  | -2.629323576 | 0.0026452  | 0.054495   |

|                 |               |                                                   |           |           |   |           |    |    |     |              |            |            |
|-----------------|---------------|---------------------------------------------------|-----------|-----------|---|-----------|----|----|-----|--------------|------------|------------|
| ENSG00000249465 | RBMXP4        | NA                                                | 109346326 | 109347459 | - | NA        | 4  | 8  | 0   | 6.011054937  | 0.00894141 | 0.44242407 |
| ENSG00000244627 | Z98749.2      | NA                                                | 38335762  | 38398929  | - | NA        | 22 | 20 | 60  | -1.60195351  | 0.00015269 | 0.03862803 |
| ENSG00000250155 | AC008957.1    | NA                                                | 36666214  | 36725195  | - | NA        | 5  | 28 | 11  | 1.315155718  | 0.01741971 | 0.59776732 |
| ENSG00000257315 | ZBED6         | zinc finger BED-type containing 6                 | 203795714 | 203854999 | + | 100381270 | 1  | 2  | 10  | -2.27463923  | 0.04430615 | 0.96117306 |
| ENSG00000250049 | AC114316.2    | NA                                                | 92082597  | 92479426  | + | NA        | 5  | 0  | 10  | -6.351290168 | 0.00242129 | 0.21443156 |
| ENSG00000233098 | CCDC144NL-AS1 | NA                                                | 20868433  | 21002276  | + | 105369205 | 17 | 5  | 16  | -1.676377416 | 0.03470407 | 0.84532906 |
| ENSG00000229931 | AL137003.1    | NA                                                | 16761138  | 16762652  | + | NA        | 6  | 1  | 16  | -3.86300453  | 0.00044798 | 0.07572067 |
| ENSG00000232531 | AC027612.3    | NA                                                | 91747940  | 91748986  | - | NA        | 2  | 48 | 21  | 1.164860486  | 0.00619366 | 0.3744952  |
| ENSG00000110799 | VWF           | von Willebrand factor                             | 5948874   | 6124770   | - | 7450      | 12 | 12 | 1   | 3.408316198  | 0.00444385 | 0.30691904 |
| ENSG00000261783 | AC009054.2    | NA                                                | 75379818  | 75381260  | - | NA        | 16 | 1  | 9   | -3.041533225 | 0.02463495 | 0.74193929 |
| ENSG00000103067 | ESRP2         | epithelial splicing regulatory protein 2          | 68229111  | 68238102  | - | 80004     | 16 | 11 | 0   | 6.464372701  | 0.00126829 | 0.14621903 |
| ENSG00000242876 | RN7SL812P     | NA                                                | 20481935  | 20482213  | - | NA        | 22 | 11 | 0   | 6.464372701  | 0.00126829 | 0.14621903 |
| ENSG00000280649 | AC245100.8    | NA                                                | 148458814 | 148459871 | + | NA        | 1  | 13 | 3   | 2.047887775  | 0.0264707  | 0.77212427 |
| ENSG00000253251 | AC008560.1    | shieldin complex subunit 3                        | 65624765  | 65630891  | + | NA        | 5  | 49 | 13  | 1.881206271  | 5.69E-05   | 0.02028441 |
| ENSG00000103154 | NECAB2        | N-terminal EF-hand calcium binding protein 2      | 83968632  | 84002776  | + | 54550     | 16 | 8  | 0   | 6.011054937  | 0.00894141 | 0.44242407 |
| ENSG00000261270 | AC012181.3    | NA                                                | 56940278  | 56941342  | + | NA        | 16 | 0  | 9   | -6.201249115 | 0.00464266 | 0.30691904 |
| ENSG00000261114 | AC012181.2    | NA                                                | 56941028  | 56941726  | + | NA        | 16 | 4  | 19  | -2.235641721 | 0.00423033 | 0.30691904 |
| ENSG00000280332 | AC020917.4    | NA                                                | 16356329  | 16358327  | - | NA        | 19 | 6  | 18  | -1.58795721  | 0.0310526  | 0.8324078  |
| ENSG00000185883 | ATP6V0C       | ATPase H+ transporting V0 subunit c               | 2513870   | 2520218   | + | 527       | 16 | 1  | 12  | -3.451660612 | 0.00444385 | 0.30691904 |
| ENSG00000145244 | CORIN         | corin, serine peptidase                           | 47593998  | 47838106  | - | 10699     | 4  | 22 | 77  | -1.824510197 | 3.07E-06   | 0.00251754 |
| ENSG00000255317 | AP002833.2    | NA                                                | 126992452 | 126995458 | + | NA        | 11 | 12 | 0   | 6.588541422  | 0.00066721 | 0.09763777 |
| ENSG00000114638 | UPK1B         | uroplakin 1B                                      | 119173517 | 119205153 | + | 7348      | 3  | 0  | 13  | -6.72571824  | 0.00035249 | 0.06443635 |
| ENSG00000105668 | UPK1A         | uroplakin 1A                                      | 35666516  | 35678483  | + | 11045     | 19 | 8  | 0   | 6.011054937  | 0.00894141 | 0.44242407 |
| ENSG00000105650 | PDE4C         | phosphodiesterase 4C                              | 18207961  | 18255419  | - | 5143      | 19 | 32 | 13  | 1.268460852  | 0.01393199 | 0.57317426 |
| ENSG00000185527 | PDE6G         | phosphodiesterase 6G                              | 81650459  | 81663112  | - | 5148      | 17 | 9  | 0   | 6.178492236  | 0.00464266 | 0.30691904 |
| ENSG00000241679 | AC018450.1    | NA                                                | 143123362 | 143131893 | + | NA        | 3  | 8  | 30  | -1.913369125 | 0.00128926 | 0.14696732 |
| ENSG00000236801 | RPL24P8       | NA                                                | 70217195  | 70217668  | + | NA        | 9  | 9  | 23  | -1.364409461 | 0.03063511 | 0.8324078  |
| ENSG00000072163 | LIMS2         | LIM zinc finger domain containing 2               | 127638381 | 127681786 | - | 55679     | 2  | 7  | 28  | -2.003710468 | 0.00128011 | 0.00221903 |
| ENSG00000245614 | DDX11-AS1     | NA                                                | 31020763  | 31073847  | - | 100506660 | 12 | 14 | 1   | 3.62856548   | 0.00141036 | 0.15455355 |
| ENSG00000182612 | TSPAN10       | tetraspanin 10                                    | 81637171  | 81648749  | + | 83882     | 17 | 26 | 59  | -1.201330595 | 0.0031579  | 0.25742529 |
| ENSG00000263370 | AC104564.2    | NA                                                | 29639627  | 29640825  | + | NA        | 17 | 10 | 0   | 6.328502073  | 0.00242129 | 0.21443156 |
| ENSG00000235907 | AC115285.1    | NA                                                | 33512008  | 33512743  | - | NA        | 1  | 6  | 0   | 5.603454913  | 0.03361661 | 0.8324078  |
| ENSG00000103528 | SYT17         | synaptotagmin 17                                  | 19167971  | 19268334  | + | 51760     | 16 | 8  | 1   | 2.830829713  | 0.04333145 | 0.95821355 |
| ENSG00000248174 | LINC02268     | NA                                                | 174200398 | 174220398 | - | 101928509 | 4  | 6  | 0   | 5.603454913  | 0.03361661 | 0.8324078  |
| ENSG00000273306 | AC018690.1    | NA                                                | 99405218  | 99405843  | + | NA        | 2  | 26 | 10  | 1.344633815  | 0.01953014 | 0.64560355 |
| ENSG00000259088 | AL137779.2    | NA                                                | 101796555 | 101810321 | - | NA        | 14 | 7  | 0   | 5.821602045  | 0.01729787 | 0.5958645  |
| ENSG00000279227 | AC009303.4    | NA                                                | 118014174 | 118015673 | + | NA        | 2  | 15 | 3   | 2.252490968  | 0.0103193  | 0.47399509 |
| ENSG00000265100 | AC005332.1    | NA                                                | 68246629  | 68247938  | - | NA        | 17 | 0  | 14  | -6.831659463 | 0.000187   | 0.04333935 |
| ENSG00000219891 | ZSCAN12P1     | NA                                                | 28091154  | 28093664  | + | NA        | 6  | 9  | 28  | -1.646820278 | 0.00546398 | 0.34782195 |
| ENSG00000256299 | AC073912.2    | NA                                                | 130810821 | 130812622 | - | NA        | 12 | 0  | 7   | -5.844270205 | 0.01729787 | 0.5958645  |
| ENSG00000219451 | RPL23P8       | NA                                                | 20827326  | 20827753  | + | 222901    | 7  | 0  | 8   | -6.033772917 | 0.00894141 | 0.44242407 |
| ENSG00000235635 | AC016644.1    | NA                                                | 56941307  | 56947152  | + | NA        | 5  | 0  | 6   | -5.626056987 | 0.03361661 | 0.8324078  |
| ENSG00000175287 | PHYHD1        | phytanoyl-CoA dioxygenase domain containing 1     | 128920895 | 128942041 | + | 254295    | 9  | 5  | 16  | -1.676377416 | 0.03470407 | 0.84532906 |
| ENSG00000065717 | TLE2          | transducin like enhancer of split 2               | 2997638   | 3047635   | - | 7089      | 19 | 24 | 92  | -1.956061287 | 1.72E-07   | 0.00026403 |
| ENSG00000221866 | PLXNA4        | plexin A4                                         | 132123332 | 132648688 | - | 91584     | 7  | 84 | 37  | 1.157126618  | 0.00095744 | 0.12285034 |
| ENSG00000245812 | LINC02202     | NA                                                | 159100483 | 159117478 | + | 101927740 | 5  | 6  | 19  | -1.665440123 | 0.02114381 | 0.68177571 |
| ENSG00000171631 | P2RY6         | pyrimidinergic receptor P2Y6                      | 73264505  | 73298617  | + | 5031      | 11 | 3  | 20  | -2.709600598 | 0.00091075 | 0.11726934 |
| ENSG00000175591 | P2RY2         | purinergic receptor P2Y2                          | 73218298  | 73236352  | + | 5029      | 11 | 8  | 1   | 2.830829713  | 0.04333145 | 0.95821355 |
| ENSG00000099957 | P2RX6         | purinergic receptor P2X 6                         | 21009808  | 21028830  | + | 9127      | 22 | 2  | 26  | -3.642235591 | 1.03E-05   | 0.00572633 |
| ENSG00000095587 | TLL2          | tollid like 2                                     | 96364606  | 96513918  | - | 7093      | 10 | 8  | 1   | 2.830829713  | 0.04333145 | 0.95821355 |
| ENSG00000174125 | TLR1          | toll like receptor 1                              | 38790677  | 38856817  | - | 7096      | 4  | 22 | 8   | 1.422407463  | 0.02463569 | 0.74193929 |
| ENSG00000205015 | LINC02138     | NA                                                | 89166383  | 89169147  | + | 400558    | 16 | 14 | 1   | 3.62856548   | 0.00141036 | 0.15455355 |
| ENSG00000108947 | EFNB3         | ephrin B3                                         | 7705202   | 7711378   | + | 1949      | 17 | 23 | 0   | -1.721299651 | 0.00903825 | 0.44449827 |
| ENSG00000250198 | LINC02199     | NA                                                | 8839732   | 8881525   | + | NA        | 5  | 0  | 8   | -6.033772917 | 0.00894141 | 0.44242407 |
| ENSG00000267216 | AC020915.2    | novel transcript                                  | 58278966  | 58315197  | + | 108903150 | 19 | 20 | 3   | 2.664520923  | 0.00091075 | 0.11726934 |
| ENSG00000234945 | GTF3C2-AS1    | NA                                                | 27335535  | 27342599  | + | 100505624 | 2  | 6  | 0   | 5.603454913  | 0.03361661 | 0.8324078  |
| ENSG00000162630 | B3GALT2       | beta-1,3-galactosyltransferase 2                  | 193179045 | 193186654 | - | 8707      | 1  | 1  | 12  | -3.451660612 | 0.00444385 | 0.30691904 |
| ENSG00000172318 | B3GALT1       | beta-1,3-galactosyltransferase 1                  | 167868948 | 167874041 | + | 8708      | 2  | 0  | 6   | -5.626056987 | 0.03361661 | 0.8324078  |
| ENSG00000188869 | TMC3          | transmembrane channel like 3                      | 81331217  | 81374213  | - | 342125    | 15 | 6  | 0   | 5.603454913  | 0.03361661 | 0.8324078  |
| ENSG00000107518 | ATRNL1        | attractin like 1                                  | 115093365 | 115948992 | + | 26033     | 10 | 37 | 18  | 1.011455495  | 0.03006695 | 0.8324078  |
| ENSG00000228709 | LINC02575     | NA                                                | 44485577  | 44490288  | + | NA        | 21 | 8  | 23  | -1.531846759 | 0.01731168 | 0.5958645  |
| ENSG00000183778 | B3GALT5       | beta-1,3-galactosyltransferase 5                  | 39556442  | 39673137  | + | 10317     | 21 | 25 | 8   | 1.605845822  | 0.00841274 | 0.44242407 |
| ENSG00000259459 | LINC02568     | NA                                                | 63390136  | 63438320  | + | NA        | 15 | 0  | 7   | -5.844270205 | 0.01729787 | 0.5958645  |
| ENSG00000248869 | LINC02511     | NA                                                | 136796722 | 137212799 | - | NA        | 4  | 0  | 6   | -5.626056987 | 0.03361661 | 0.8324078  |
| ENSG00000251580 | LINC02482     | NA                                                | 6670725   | 6673830   | - | 105374366 | 4  | 0  | 6   | -5.626056987 | 0.03361661 | 0.8324078  |
| ENSG00000226088 | AL158839.1    | NA                                                | 70359562  | 70360437  | - | NA        | 1  | 0  | 16  | -7.02272042  | 5.33E-05   | 0.0193511  |
| ENSG00000284430 | AC020912.1    | NA                                                | 31100304  | 31147981  | + | NA        | 19 | 73 | 29  | 1.305102962  | 0.00050882 | 0.08259904 |
| ENSG00000140459 | CYP11A1       | cytochrome P450 family 11 subfamily A member 1    | 74337759  | 74367740  | - | 1583      | 15 | 5  | 29  | -2.529376224 | 0.00012857 | 0.03468662 |
| ENSG00000267510 | AC011451.1    | NA                                                | 9291515   | 9294482   | + | NA        | 19 | 21 | 2   | 3.291090676  | 0.0001437  | 0.03734573 |
| ENSG00000164674 | SYTL3         | synaptotagmin like 3                              | 158650014 | 158764876 | + | 94120     | 6  | 58 | 25  | 1.187044479  | 0.00269915 | 0.22823959 |
| ENSG00000268660 | LETM1P2       | NA                                                | 58044592  | 58046769  | + | NA        | 19 | 8  | 0   | 6.011054937  | 0.00894141 | 0.44242407 |
| ENSG00000272218 | AC108865.2    | NA                                                | 186892552 | 186892983 | + | NA        | 4  | 0  | 9   | -6.201249115 | 0.00464266 | 0.30691904 |
| ENSG00000135903 | PAX3          | paired box 3                                      | 222199888 | 222298996 | - | 5077      | 2  | 1  | 12  | -3.451660612 | 0.00444385 | 0.30691904 |
| ENSG00000185432 | METTL7A       | methyltransferase like 7A                         | 50923472  | 50932517  | + | 25840     | 12 | 78 | 158 | -1.040254653 | 0.00027983 | 0.05673573 |
| ENSG00000258947 | TUBB3         | tubulin beta 3 class III                          | 89921392  | 89938761  | + | 10381     | 16 | 12 | 29  | -1.287177805 | 0.02111849 | 0.68177571 |
| ENSG00000248810 | LINC02432     | NA                                                | 141319450 | 141332618 | - | NA        | 4  | 0  | 0   | 5.821602045  | 0.01729787 | 0.5958645  |
| ENSG00000271538 | LINC02427     | NA                                                | 184506460 | 184537554 | - | 105377585 | 4  | 0  | 6   | -5.626056987 | 0.03361661 | 0.8324078  |
| ENSG00000174292 | TNK1          | tyrosine kinase non receptor 1                    | 7380534   | 7389774   | + | 8711      | 17 | 7  | 27  | -1.951478619 | 0.00190528 | 0.18740233 |
| ENSG00000226085 | UQCRRF1P1     | NA                                                | 39875289  | 39876108  | + | NA        | 22 | 7  | 23  | -1.721299651 | 0.00903825 | 0.44449827 |
| ENSG00000160207 | HSF2BP        | heat shock transcription factor 2 binding protein | 43529192  | 43659493  | - | 11077     | 21 | 51 | 20  | 1.322067076  | 0.00182998 | 0.18415151 |
| ENSG00000277130 | AC073569.3    | NA                                                | 79818784  | 79819465  | - | NA        | 12 | 2  | 10  | -2.27463923  | 0.04430615 | 0.96117306 |
| ENSG00000257259 | LINC02388     | NA                                                | 58565960  | 58781747  | - | 101927653 | 12 | 8  | 0   | 6.011054937  | 0.00894141 | 0.44242407 |
| ENSG00000249129 | SUDS3P1       | NA                                                | 177971316 | 177972281 | + | NA        | 5  | 0  | 15  | -6.930350488 | 9.96E-05   | 0.02829695 |
| ENSG00000256292 | LINC02376     | NA                                                | 127274467 | 127284283 | - | NA        | 12 | 10 | 1   |              |            |            |



|                 |            |                                                         |           |           |   |           |    |     |     |              |            |            |
|-----------------|------------|---------------------------------------------------------|-----------|-----------|---|-----------|----|-----|-----|--------------|------------|------------|
| ENSG00000187944 | C2orf66    | chromosome 2 open reading frame 66                      | 196805002 | 196810276 | - | 401027    | 2  | 4   | 24  | -2.570726543 | 0.00042196 | 0.07378461 |
| ENSG00000168152 | THAP9      | THAP domain containing 9                                | 82900684  | 82919969  | + | 79725     | 4  | 77  | 37  | 1.031792158  | 0.00379978 | 0.29249514 |
| ENSG00000248371 | LINC02056  | NA                                                      | 72574120  | 72660669  | - | 102477328 | 5  | 47  | 21  | 1.1345672    | 0.00795583 | 0.42845793 |
| ENSG00000158220 | ESY73      | extended synaptotagmin 3                                | 138434586 | 138481686 | + | 83850     | 3  | 2   | 12  | -2.534725564 | 0.01608407 | 0.59586645 |
| ENSG00000143452 | HORMAD1    | HORMA domain containing 1                               | 150698060 | 150720888 | - | 84072     | 1  | 7   | 0   | 5.821602045  | 0.01729787 | 0.59586645 |
| ENSG00000151789 | ZNF385D    | zinc finger protein 385D                                | 21412222  | 22373321  | - | 79750     | 3  | 52  | 141 | -1.459961255 | 2.65E-06   | 0.00238334 |
| ENSG00000225554 | AL359764.1 | NA                                                      | 241424292 | 241433492 | + | NA        | 1  | 16  | 2   | 2.90145966   | 0.00200946 | 0.19394578 |
| ENSG00000238212 | LINC02096  | NA                                                      | 14834638  | 14900554  | + | 107984977 | 17 | 7   | 0   | 5.821602045  | 0.01729787 | 0.59586645 |
| ENSG00000267662 | AC025809.1 | NA                                                      | 31348881  | 31417794  | + | NA        | 19 | 0   | 9   | -6.201249115 | 0.00464266 | 0.30691904 |
| ENSG00000137573 | SULF1      | sulfatase 1                                             | 69466624  | 69660915  | + | 23213     | 8  | 157 | 391 | -1.338777084 | 6.26E-08   | 0.00011084 |
| ENSG00000198028 | ZNF560     | zinc finger protein 560                                 | 9466507   | 9498607   | - | 147741    | 19 | 4   | 14  | -1.798406149 | 0.03847433 | 0.90546426 |
| ENSG00000256967 | AC018653.3 | NA                                                      | 7129079   | 7131198   | - | NA        | 12 | 8   | 20  | -1.33137288  | 0.04895303 | 1          |
| ENSG00000222024 | AC004945.1 | NA                                                      | 79353410  | 79354392  | + | NA        | 7  | 0   | 8   | -6.033772917 | 0.00894141 | 0.44242407 |
| ENSG00000235034 | C19orf81   | chromosome 19 open reading frame 81                     | 50649445  | 50659310  | + | 342918    | 19 | 3   | 14  | -2.198832243 | 0.01657597 | 0.59586645 |
| ENSG00000108244 | KRT23      | keratin 23                                              | 40922696  | 40937634  | - | 25984     | 17 | 6   | 0   | 5.603454913  | 0.03361661 | 0.8324078  |
| ENSG00000227329 | AL139396.1 | NA                                                      | 53164391  | 53164557  | - | 728113    | X  | 13  | 30  | -1.221559025 | 0.02513009 | 0.75052463 |
| ENSG00000131737 | KRT34      | keratin 34                                              | 41377650  | 41382403  | - | 3885      | 17 | 721 | 343 | 1.048448376  | 3.92E-06   | 0.00285493 |
| ENSG00000280005 | AC079298.2 | NA                                                      | 154261735 | 154262193 | + | NA        | 4  | 17  | 2   | 2.988259266  | 0.00118753 | 0.14474367 |
| ENSG00000176244 | ACBD7      | acyl-CoA binding domain containing 7                    | 15077523  | 15088776  | - | 414149    | 10 | 29  | 10  | 1.501455142  | 0.00718023 | 0.41003926 |
| ENSG00000278611 | AC008567.3 | NA                                                      | 9538733   | 9539734   | + | 101928238 | 19 | 9   | 26  | -1.540394293 | 0.01104842 | 0.49678423 |
| ENSG00000264230 | ANXA8L1    | annexin A8 like 1                                       | 46375627  | 46537864  | + | 728113    | 10 | 12  | 2   | 2.490174747  | 0.01608407 | 0.59586645 |
| ENSG00000188033 | ZNF490     | zinc finger protein 490                                 | 12577961  | 12640098  | - | 57474     | 19 | 5   | 21  | -2.066050765 | 0.00432709 | 0.00491904 |
| ENSG00000197714 | ZNF460     | zinc finger protein 460                                 | 57280051  | 57293569  | + | 10794     | 19 | 23  | 9   | 1.318704357  | 0.03063511 | 0.8324078  |
| ENSG00000186364 | NUDT17     | nudix hydrolase 17                                      | 145845629 | 145848953 | + | 200035    | 1  | 13  | 32  | -1.314297218 | 0.01393199 | 0.57317426 |
| ENSG00000205835 | GMNC       | geminin coiled-coil domain containing                   | 190852877 | 190892429 | - | 647309    | 3  | 7   | 0   | 5.821602045  | 0.01729787 | 0.59586645 |
| ENSG00000228327 | AL669831.1 | NA                                                      | 725885    | 778626    | - | NA        | 1  | 50  | 17  | 1.52646638   | 0.00052461 | 0.0846774  |
| ENSG00000258636 | AL121821.1 | NA                                                      | 41587861  | 41604856  | - | NA        | 14 | 28  | 13  | 1.076623878  | 0.04444927 | 0.96117306 |
| ENSG00000257831 | AL136418.1 | NA                                                      | 31248628  | 31302739  | + | NA        | 14 | 12  | 1   | 3.408316198  | 0.00444385 | 0.30691904 |
| ENSG00000197769 | MAP1LC3C   | microtubule associated protein 1 light chain 3 gamma    | 241995490 | 241999073 | - | 440738    | 1  | 0   | 6   | -5.626056987 | 0.03361661 | 0.8324078  |
| ENSG00000105519 | CAPS       | calcyphosine                                            | 5911707   | 5915877   | + | 828       | 19 | 16  | 37  | -1.226036537 | 0.0133442  | 0.56335009 |
| ENSG00000128266 | GNAZ       | G protein subunit alpha z                               | 23070361  | 23125037  | + | 2781      | 22 | 2   | 11  | -2.410535462 | 0.02678048 | 0.77212427 |
| ENSG00000248773 | AC108727.1 | NA                                                      | 140972744 | 140973255 | + | NA        | 3  | 10  | 1   | 3.148276849  | 0.01395124 | 0.57317426 |
| ENSG00000227486 | AL445472.1 | NA                                                      | 55908123  | 56015173  | + | NA        | X  | 0   | 7   | -5.844270205 | 0.01729787 | 0.59586645 |
| ENSG00000241962 | AC079447.1 | novel protein, C2orf15-MRPL30-novel lincRNA readthrough | 99141485  | 99322741  | + | NA        | 2  | 9   | 0   | 6.178492236  | 0.00464266 | 0.30691904 |
| ENSG00000137285 | TUBB2B     | tubulin beta 2B class IIb                               | 3224261   | 3231730   | - | 347733    | 6  | 7   | 32  | -2.195560211 | 0.00025475 | 0.05325746 |
| ENSG00000284154 | MIR3605    | NA                                                      | 33332393  | 33332492  | - | 100500853 | 1  | 15  | 4   | 1.85184114   | 0.02504257 | 0.74870021 |
| ENSG00000230623 | AC104461.1 | NA                                                      | 200333193 | 200478293 | + | NA        | 1  | 17  | 6   | 2.124057062  | 0.00081957 | 0.11002963 |
| ENSG00000124713 | GNMT       | glycine N-methyltransferase                             | 42960758  | 42963880  | + | 27232     | 6  | 13  | 1   | 3.522639813  | 0.00250381 | 0.21723364 |
| ENSG00000228242 | AC093495.1 | NA                                                      | 14144637  | 14165978  | + | NA        | 3  | 66  | 13  | 2.309937135  | 1.65E-07   | 0.00026033 |
| ENSG00000266533 | MIR3619    | NA                                                      | 46091044  | 46091126  | + | 100500828 | 22 | 9   | 0   | 6.178492236  | 0.00464266 | 0.30691904 |
| ENSG00000207983 | MIR613     | NA                                                      | 12764649  | 12764743  | + | 693198    | 12 | 0   | 7   | -5.844270205 | 0.01729787 | 0.59586645 |
| ENSG00000230371 | KARSP2     | NA                                                      | 113130416 | 113132054 | + | NA        | 13 | 0   | 7   | -5.844270205 | 0.01729787 | 0.59586645 |
| ENSG00000243650 | RN7SL834P  | NA                                                      | 230507101 | 230507386 | + | NA        | 2  | 16  | 3   | 2.344849074  | 0.00639309 | 0.38046285 |
| ENSG00000176973 | FAM89B     | family with sequence similarity 89 member B             | 65572349  | 65574198  | + | 23625     | 11 | 1   | 9   | -3.041533225 | 0.02463495 | 0.74193929 |
| ENSG00000217258 | AC007249.1 | NA                                                      | 10452319  | 10455552  | + | NA        | 2  | 0   | 7   | -5.844270205 | 0.01729787 | 0.59586645 |
| ENSG00000252562 | RNU6-922P  | NA                                                      | 23613661  | 23613759  | - | NA        | 3  | 6   | 0   | 5.603454913  | 0.03361661 | 0.8324078  |
| ENSG00000168672 | FAM84B     | family with sequence similarity 84 member B             | 126552442 | 126558393 | - | 157638    | 8  | 17  | 5   | 1.717772741  | 0.02315658 | 0.72522737 |
| ENSG00000170684 | ZNF296     | zinc finger protein 296                                 | 45071500  | 45076588  | - | 162979    | 19 | 41  | 15  | 1.420138004  | 0.00259342 | 0.22280582 |
| ENSG00000249693 | THEGL      | theg spermatid protein like                             | 56530609  | 56603507  | + | 100506564 | 4  | 13  | 0   | 6.702865037  | 0.00035249 | 0.06443635 |
| ENSG00000163705 | FANCD2OS   | FANCD2 opposite strand                                  | 10081317  | 10108231  | - | 115795    | 3  | 0   | 7   | -5.844270205 | 0.01729787 | 0.59586645 |
| ENSG00000163827 | LRRC2      | leucine rich repeat containing 2                        | 46515423  | 46580099  | - | 79442     | 3  | 44  | 14  | 1.620407245  | 0.00057702 | 0.09005816 |
| ENSG00000275552 | AC243965.2 | NA                                                      | 22595808  | 22598946  | - | NA        | 14 | 1   | 10  | -3.191574278 | 0.01395124 | 0.57317426 |
| ENSG00000227632 | AC018804.1 | NA                                                      | 130202312 | 130212628 | + | NA        | 2  | 10  | 2   | 2.230135398  | 0.04430615 | 0.96117306 |
| ENSG00000159917 | ZNF235     | zinc finger protein 235                                 | 44228729  | 44305046  | - | 9310      | 19 | 8   | 47  | -2.55891777  | 1.55E-06   | 0.00149041 |
| ENSG00000165804 | ZNF219     | zinc finger protein 219                                 | 21090046  | 21104722  | - | 51222     | 14 | 69  | 179 | -1.396731253 | 1.17E-06   | 0.00127051 |
| ENSG00000203434 | AL353740.1 | NA                                                      | 108547975 | 108561815 | - | NA        | 10 | 58  | 24  | 1.245641512  | 0.00178899 | 0.18307847 |
| ENSG00000196407 | THEM5      | thioesterase superfamily member 5                       | 151847263 | 151853697 | - | 284486    | 1  | 28  | 8   | 1.768569201  | 0.00275824 | 0.23217626 |
| ENSG00000186354 | C9orf47    | NA                                                      | 88990863  | 88996140  | + | NA        | 9  | 21  | 6   | 1.763400365  | 0.00962572 | 0.45874658 |
| ENSG00000108688 | CCL7       | C-C motif chemokine ligand 7                            | 34270221  | 34272242  | + | 6354      | 17 | 0   | 12  | -6.611376502 | 0.00066721 | 0.09763777 |
| ENSG00000258725 | PRC1-AS1   | NA                                                      | 90966345  | 90988624  | + | 100507118 | 15 | 0   | 7   | -5.844270205 | 0.01729787 | 0.59586645 |
| ENSG00000174137 | FAM53A     | family with sequence similarity 53 member A             | 1617915   | 1684302   | - | 152877    | 4  | 20  | 41  | -1.053993119 | 0.0236259  | 0.73464625 |
| ENSG00000173114 | LRRN3      | leucine rich repeat neuronal 3                          | 111091006 | 111125454 | + | 54674     | 7  | 62  | 20  | 1.60320709   | 8.66E-05   | 0.02652668 |
| ENSG00000270607 | AC009549.1 | NA                                                      | 19710934  | 19712619  | - | NA        | 11 | 104 | 33  | 1.629308578  | 2.28E-06   | 0.00208189 |
| ENSG00000249456 | AL731577.2 | NA                                                      | 124917143 | 124942881 | + | NA        | 10 | 0   | 14  | -6.831659463 | 0.000187   | 0.04333935 |
| ENSG00000125810 | CD93       | CD93 molecule                                           | 23079349  | 23086340  | - | 22918     | 20 | 52  | 3   | 4.037463631  | 1.63E-10   | 5.78E-07   |
| ENSG00000247595 | SPTY2D1OS  | SPTY2D1 opposite strand                                 | 18588781  | 18610255  | + | 100506540 | 11 | 2   | 15  | -2.85369955  | 0.00339444 | 0.27265605 |
| ENSG00000212240 | RNU6-930P  | NA                                                      | 28915645  | 28915744  | + | NA        | 6  | 0   | 6   | -5.626056987 | 0.03361661 | 0.8324078  |
| ENSG00000225891 | AL513365.2 | NA                                                      | 26462756  | 26467282  | - | NA        | 1  | 7   | 0   | 5.821602045  | 0.01729787 | 0.59586645 |
| ENSG00000115286 | NDUFS7     | NADH:ubiquinone oxidoreductase core subunit S7          | 1383527   | 1395589   | + | 374291    | 19 | 23  | 3   | 2.86497621   | 0.000207   | 0.04672245 |
| ENSG00000219470 | AL355802.1 | NA                                                      | 43538822  | 43539703  | - | NA        | 6  | 1   | 8   | -2.874057027 | 0.04333145 | 0.95821355 |
| ENSG00000231760 | AL355312.2 | NA                                                      | 149796151 | 149826294 | - | NA        | 6  | 4   | 15  | -1.897097174 | 0.02504257 | 0.74870021 |
| ENSG00000135077 | HAVCR2     | hepatitis A virus cellular receptor 2                   | 157085832 | 157142869 | - | 84868     | 5  | 0   | 9   | -6.201249115 | 0.00464266 | 0.30691904 |
| ENSG00000205464 | ATP6AP1L   | ATPase H+ transporting accessory protein 1 like         | 82279462  | 82386977  | + | 92270     | 5  | 71  | 31  | 1.169276576  | 0.00173673 | 0.17955239 |
| ENSG00000277149 | TYW1B      | tRNA-yW synthesizing protein 1 homolog B                | 72558744  | 72828198  | - | 441250    | 7  | 92  | 43  | 1.072044409  | 0.00142613 | 0.15567916 |
| ENSG00000113361 | CDH6       | cadherin 6                                              | 31193750  | 31329146  | + | 1004      | 5  | 51  | 116 | -1.20661007  | 0.0001616  | 0.04050968 |
| ENSG00000279086 | AC073130.3 | NA                                                      | 116209234 |           |   |           |    |     |     |              |            |            |

|                 |            |                                                               |           |           |   |           |            |      |     |              |            |             |
|-----------------|------------|---------------------------------------------------------------|-----------|-----------|---|-----------|------------|------|-----|--------------|------------|-------------|
| ENSG00000161509 | GRIN2C     | glutamate ionotropic receptor NMDA type subunit 2C            | 74842023  | 74861504  | - | 2905      | 17         | 2    | 11  | -2.410535462 | 0.02678048 | 0.77212427  |
| ENSG00000105464 | GRIN2D     | glutamate ionotropic receptor NMDA type subunit 2D            | 48394875  | 48444931  | + | 2906      | 19         | 26   | 53  | -1.046950499 | 0.01230527 | 0.53917642  |
| ENSG00000198785 | GRIN3A     | glutamate ionotropic receptor NMDA type subunit 3A            | 101569353 | 101738580 | - | 116443    | 9          | 8    | 0   | 6.011054937  | 0.00894141 | 0.44242407  |
| ENSG00000164761 | TNFRSF11B  | TNF receptor superfamily member 11b                           | 118923557 | 118952200 | - | 4982      | 8          | 100  | 197 | -1.000359735 | 0.00024335 | 0.05305877  |
| ENSG0000007516  | BAIAP3     | BAI1 associated protein 3                                     | 1333601   | 1349441   | + | 8938      | 16         | 3    | 14  | -2.198832243 | 0.01657597 | 0.5958645   |
| ENSG00000159958 | TNFRSF13C  | TNF receptor superfamily member 13C                           | 41922023  | 41926818  | - | 115650    | 22         | 0    | 7   | -5.844270205 | 0.01729787 | 0.5958645   |
| ENSG00000207110 | RNU1-106P  | NA                                                            | 127999131 | 127999294 | + | NA        | 8          | 8    | 11  | 3.284147477  | 0.00788025 | 0.42560136  |
| ENSG00000280434 | AL031595.3 | NA                                                            | 44139365  | 44153626  | + | NA        | 22         | 5    | 18  | -1.845069119 | 0.01534811 | 0.5958645   |
| ENSG00000232118 | BACH1-AS1  | NA                                                            | 29370019  | 29376339  | - | NA        | 21         | 8    | 0   | 6.011054937  | 0.00894141 | 0.44242407  |
| ENSG00000226124 | FTCDNL1    | formiminotransferase cyclodeaminase N-terminal like           | 199760544 | 199851173 | - | 348751    | 2          | 39   | 9   | 2.077316244  | 9.19E-05   | 0.0277068   |
| ENSG00000241990 | PRR34-AS1  | NA                                                            | 46053705  | 46057210  | + | NA        | 22         | 3    | 13  | -2.09289102  | 0.0264707  | 0.77212427  |
| ENSG00000100288 | CHKB       | choline kinase beta                                           | 50578949  | 50601455  | - | 1120      | 22         | 20   | 3   | 2.664520923  | 0.00091075 | 0.11726934  |
| ENSG00000140465 | CYP1A1     | NA                                                            | 74719542  | 74725610  | - | 1543      | 15         | 27   | 9   | 1.548864934  | 0.00778622 | 0.42560136  |
| ENSG00000106069 | CHN2       | chimerin 2                                                    | 29122274  | 29514328  | + | 1124      | 7          | 3    | 31  | -3.338710976 | 3.93E-06   | 0.00285493  |
| ENSG00000145428 | RNF175     | ring finger protein 175                                       | 153710125 | 153760235 | - | 285533    | 4          | 23   | 55  | -1.276237809 | 0.00246665 | 0.2166637   |
| ENSG00000259946 | BX005019.1 | NA                                                            | 97967005  | 97968814  | - | NA        | 1          | 0    | 13  | -6.72571824  | 0.00035249 | 0.06443635  |
| ENSG00000151533 | CCDC88C    | coiled-coil domain containing 88C                             | 91271323  | 91417844  | - | 440193    | 14         | 0    | 12  | -6.611376502 | 0.00066721 | 0.09763777  |
| ENSG00000176383 | B3GNT4     | UDP-GlcNAc:betaGal beta-1,3-N-acetylglucosaminyltransferase 4 | 122203543 | 122208952 | + | 79369     | 12         | 1    | 11  | -3.32747051  | 0.00788025 | 0.42560136  |
| ENSG00000278384 | AL354822.1 | NA                                                            | 51867     | 54893     | - | NA        | GL000218.1 | 8    | 0   | 6.011054937  | 0.00894141 | 0.44242407  |
| ENSG00000180336 | MEIOC      | meiosis specific with coiled-coil domain                      | 44656404  | 44690308  | + | 284071    | 17         | 10   | 31  | -1.643036123 | 0.00360939 | 0.28440855  |
| ENSG00000267257 | AC105105.1 | NA                                                            | 58535415  | 58538552  | + | NA        | 18         | 10   | 0   | 6.328502073  | 0.00242129 | 0.21443156  |
| ENSG00000181350 | LRRC75A    | leucine rich repeat containing 75A                            | 16441577  | 16492153  | - | 388341    | 17         | 8    | 21  | -1.401338831 | 0.03484493 | 0.084532906 |
| ENSG00000173641 | HSPB7      | heat shock protein family B (small) member 7                  | 16014028  | 16019594  | - | 27129     | 1          | 132  | 336 | -1.370152114 | 6.25E-08   | 0.00011084  |
| ENSG00000170276 | HSPB2      | heat shock protein family B (small) member 2                  | 111912242 | 111914093 | + | 3316      | 11         | 7    | 0   | 5.821602045  | 0.01729787 | 0.5958645   |
| ENSG00000273828 | AL133227.1 | NA                                                            | 46364551  | 46390885  | + | NA        | 20         | 7    | 0   | 5.821602045  | 0.01729787 | 0.5958645   |
| ENSG00000100121 | GGTLC2     | gamma-glutamyltransferase light chain 2                       | 22644475  | 22647903  | + | 91227     | 22         | 6    | 0   | 5.603454913  | 0.03361661 | 0.8324078   |
| ENSG00000228748 | AL450306.1 | NA                                                            | 77782866  | 77793176  | + | NA        | 10         | 6    | 0   | 5.603454913  | 0.03361661 | 0.8324078   |
| ENSG00000185155 | MIXL1      | Mix paired-like homeobox                                      | 226223618 | 226227054 | + | 83881     | 1          | 0    | 12  | -6.611376502 | 0.00066721 | 0.09763777  |
| ENSG00000114737 | CISH       | cytokine inducible SH2 containing protein                     | 50606490  | 50611831  | - | 1154      | 3          | 55   | 110 | -1.02139705  | 0.00137134 | 0.15384832  |
| ENSG00000268713 | AC005261.4 | NA                                                            | 57261354  | 57262738  | + | NA        | 19         | 18   | 37  | -1.05736457  | 0.03006695 | 0.8324078   |
| ENSG00000083807 | SL27A5     | solute carrier family 27 member 5                             | 58479512  | 58512413  | - | 10998     | 19         | 21   | 57  | -1.458150355 | 0.00058838 | 0.09152773  |
| ENSG00000152580 | IGSF10     | immunoglobulin superfamily member 10                          | 151425384 | 151458709 | - | 285313    | 3          | 33   | 12  | 1.427025235  | 0.00607118 | 0.37185167  |
| ENSG00000136167 | LCP1       | lymphocyte cytosolic protein 1                                | 46125920  | 46211871  | - | 3936      | 13         | 102  | 48  | 1.062448777  | 0.00105731 | 0.13311497  |
| ENSG00000130810 | PPAN       | peter pan homolog (Drosophila)                                | 10106289  | 10111634  | + | 56342     | 19         | 19   | 46  | -1.293055441 | 0.00441553 | 0.30691904  |
| ENSG00000154864 | PIEZO2     | piezo type mechanosensitive ion channel component 2           | 10666483  | 11148762  | - | 63895     | 18         | 31   | 3   | 3.293580654  | 3.93E-06   | 0.00285493  |
| ENSG00000267506 | AC021683.2 | NA                                                            | 77546940  | 77563243  | + | NA        | 17         | 0    | 6   | -5.626056987 | 0.03361661 | 0.8324078   |
| ENSG00000274954 | AC090971.5 | NA                                                            | 51833134  | 51833426  | + | NA        | 15         | 9    | 0   | 6.178492236  | 0.00464266 | 0.30691904  |
| ENSG00000281344 | HELLPAR    | NA                                                            | 102197585 | 102402596 | + | NA        | 12         | 23   | 8   | 1.486180555  | 0.01731168 | 0.5958645   |
| ENSG00000163975 | MELTF      | melanotransferrin                                             | 196988621 | 197029816 | - | 4241      | 3          | 9    | 24  | -1.425487622 | 0.02192594 | 0.70005671  |
| ENSG00000267309 | AC092295.2 | NA                                                            | 36489649  | 36491040  | + | 728752    | 19         | 33   | 12  | 1.427025235  | 0.00607118 | 0.37185167  |
| ENSG00000260698 | AL591848.3 | NA                                                            | 246682108 | 246685075 | + | NA        | 1          | 0    | 9   | -6.201249115 | 0.00464266 | 0.30691904  |
| ENSG00000250220 | AC053527.1 | NA                                                            | 73259209  | 73317953  | + | NA        | 4          | 11   | 2   | 2.366006025  | 0.02678048 | 0.77212427  |
| ENSG00000235700 | CYCSF52    | NA                                                            | 157128362 | 157128671 | + | 360155    | 1          | 9    | 1   | 2.998267012  | 0.02463495 | 0.74193929  |
| ENSG00000250064 | AC097480.1 | NA                                                            | 28435449  | 28600275  | + | NA        | 4          | 13   | 3   | 2.047887775  | 0.0264707  | 0.77212427  |
| ENSG00000237017 | AC245052.4 | NA                                                            | 54119511  | 54125343  | - | NA        | 19         | 0    | 7   | -5.844270205 | 0.01729787 | 0.5958645   |
| ENSG00000260285 | AL133367.1 | NA                                                            | 103525010 | 103529072 | - | NA        | 14         | 1    | 14  | -3.671943573 | 0.00141036 | 0.15455355  |
| ENSG00000165568 | AKR1E2     | aldo-keto reductase family 1 member E2                        | 4786629   | 4848062   | + | 83592     | 10         | 9    | 22  | -1.300630732 | 0.04253884 | 0.95821355  |
| ENSG00000236404 | VLDLR-AS1  | NA                                                            | 2422702   | 2643359   | - | 401491    | 9          | 20   | 7   | 1.47522798   | 0.0276789  | 0.78920399  |
| ENSG00000165949 | IFI27      | interferon alpha inducible protein 27                         | 94104836  | 94116698  | + | 3429      | 14         | 189  | 66  | 1.493028853  | 2.42E-07   | 0.00035158  |
| ENSG00000116690 | PRG4       | proteoglycan 4                                                | 186296279 | 186314562 | + | 10216     | 1          | 8    | 1   | 2.830829713  | 0.04333145 | 0.95821355  |
| ENSG00000266969 | AP002449.1 | NA                                                            | 12984694  | 12991173  | - | NA        | 18         | 19   | 0   | 7.245972896  | 8.35E-06   | 0.00498038  |
| ENSG00000224057 | EGFR-AS1   | NA                                                            | 55179750  | 55188934  | - | 100507500 | 7          | 14   | 3   | 2.153813442  | 0.01657597 | 0.5958645   |
| ENSG00000233912 | AC026202.2 | NA                                                            | 5156905   | 5187329   | - | NA        | 3          | 11   | 1   | 3.284147477  | 0.00788025 | 0.42560136  |
| ENSG00000184227 | ACOT1      | acyl-CoA thioesterase 1                                       | 73537114  | 73543794  | + | 641371    | 14         | 50   | 126 | -1.354284771 | 1.95E-05   | 0.00929103  |
| ENSG00000189171 | S100A13    | S100 calcium binding protein A13                              | 153618787 | 153631360 | - | 6284      | 1          | 15   | 41  | -1.466023074 | 0.00259342 | 0.22280582  |
| ENSG00000115461 | IGFBP5     | insulin like growth factor binding protein 5                  | 216672105 | 216695525 | - | 3488      | 2          | 1137 | 559 | 1.001079002  | 5.08E-06   | 0.00342747  |
| ENSG00000227006 | AL136988.2 | NA                                                            | 230258694 | 230268483 | - | NA        | 1          | 8    | 20  | -1.33137288  | 0.04895303 | 1           |
| ENSG00000274776 | AC090241.3 | NA                                                            | 46786699  | 46789297  | - | NA        | 18         | 1    | 10  | -3.191574278 | 0.01395124 | 0.57317426  |
| ENSG00000188385 | JAKMIP3    | Janus kinase and microtubule interacting protein 3            | 132104671 | 132184809 | + | 282973    | 10         | 17   | 42  | -1.321527202 | 0.00526378 | 0.33741566  |
| ENSG00000226450 | CYP2D8P    | NA                                                            | 42149886  | 42155001  | - | NA        | 22         | 0    | 6   | -5.626056987 | 0.03361661 | 0.8324078   |
| ENSG00000273014 | AC018645.2 | NA                                                            | 32758882  | 32759353  | + | NA        | 7          | 38   | 13  | 1.515494671  | 0.00216503 | 0.20507185  |
| ENSG00000243137 | PSG4       | pregnancy specific beta-1-glycoprotein 4                      | 43192702  | 43207299  | - | 5672      | 19         | 37   | 5   | 2.834014417  | 3.55E-06   | 0.00275693  |
| ENSG00000236069 | AL136987.2 | NA                                                            | 192529579 | 192538102 | + | NA        | 1          | 1    | 9   | -3.041533225 | 0.02463495 | 0.74193929  |
| ENSG00000218175 | AC016739.1 | NA                                                            | 176200908 | 176201252 | - | NA        | 2          | 12   | 44  | -1.886532865 | 0.00015341 | 0.03862803  |
| ENSG00000259438 | AC090970.2 | NA                                                            | 52010999  | 52019095  | - | NA        | 15         | 6    | 0   | 5.603454913  | 0.03361661 | 0.8324078   |
| ENSG00000280159 | AC016583.1 | NA                                                            | 54643557  | 54645987  | + | NA        | 5          | 0    | 7   | -5.844270205 | 0.01729787 | 0.5958645   |
| ENSG00000270074 | AC087203.3 | NA                                                            | 12412827  | 12414373  | + | NA        | 8          | 0    | 10  | -6.351290168 | 0.00242129 | 0.21443156  |
| ENSG00000125650 | PSPN       | persephin                                                     | 6375148   | 6379058   | - | 5623      | 19         | 39   | 19  | 1.009670323  | 0.02660856 | 0.77212427  |
| ENSG00000072952 | MRV1       | murine retrovirus integration site 1 homolog                  | 10573091  | 10693988  | - | 10335     | 11         | 359  | 714 | -1.014757442 | 7.20E-06   | 0.00468779  |
| ENSG00000236166 | AL021408.1 | NA                                                            | 132085084 | 132099279 | + | NA        | 6          | 7    | 0   | 5.821602045  | 0.01729787 | 0.5958645   |
| ENSG00000121104 | FAM117A    | family with sequence similarity 117 member A                  | 49710332  | 49789180  | - | 81558     | 17         | 43   | 95  | -1.164324435 | 0.00056501 | 0.08891788  |
| ENSG00000267649 | AC010327.4 | NA                                                            | 55216660  | 55221616  | + | NA        | 19         | 6    | 0   | 5.603454913  | 0.03361661 | 0.8324078   |
| ENSG00000279386 | AC021106.3 | NA                                                            | 37866561  | 37867091  | - | NA        | 4          | 24   | 8   | 1.547253547  | 0.01209816 | 0.53423305  |
| ENSG00000204880 | KRTAP4-8   | keratin associated protein 4-8                                | 41096981  | 41098141  | - | 728224    | 17         | 6    | 0   | 5.603454913  | 0.03361661 | 0.8324078   |
| ENSG00000118322 | ATP10B     | ATPase phospholipid transporting 10B (putative)               | 160563120 | 160852214 | - | 23120     | 5          | 11   | 0   | 6.464372701  | 0.00126829 | 0.14621903  |
| ENSG00000215158 | AC13840    |                                                               |           |           |   |           |            |      |     |              |            |             |

|                 |                |                                                    |           |           |   |           |    |      |     |              |            |            |
|-----------------|----------------|----------------------------------------------------|-----------|-----------|---|-----------|----|------|-----|--------------|------------|------------|
| ENSG00000080618 | CPB2           | carboxypeptidase B2                                | 46053186  | 46105076  | - | 1361      | 13 | 7    | 0   | 5.821602045  | 0.01729787 | 0.5958645  |
| ENSG00000158525 | CPA5           | carboxypeptidase A5                                | 130344816 | 130368730 | + | 93979     | 7  | 6    | 0   | 5.603454913  | 0.03361661 | 0.8324078  |
| ENSG00000128510 | CPA4           | carboxypeptidase A4                                | 130293134 | 130324180 | + | 51200     | 7  | 1937 | 934 | 1.029158878  | 1.47E-06   | 0.00148972 |
| ENSG00000272716 | AL121658.1     | NA                                                 | 32165046  | 32165757  | - | NA        | 2  | 11   | 0   | 6.464372701  | 0.00126829 | 0.14621903 |
| ENSG00000136275 | C7orf69        | NA                                                 | 47795291  | 47819847  | + | NA        | 7  | 9    | 0   | 6.178492236  | 0.00464266 | 0.30691904 |
| ENSG00000178531 | CTXN1          | cortixin 1                                         | 7924485   | 7926166   | - | 404217    | 19 | 26   | 54  | -1.073855184 | 0.0098652  | 0.46619858 |
| ENSG00000176165 | FOXG1          | forkhead box G1                                    | 28760330  | 28770277  | + | 2290      | 14 | 29   | 11  | 1.365558911  | 0.01266414 | 0.54624477 |
| ENSG00000170608 | FOXA3          | forkhead box A3                                    | 45863989  | 45873797  | + | 3171      | 19 | 0    | 11  | -6.4871864   | 0.00126829 | 0.14621903 |
| ENSG00000278937 | AL137141.1     | NA                                                 | 46117864  | 46122699  | + | NA        | 13 | 10   | 2   | 2.230135398  | 0.04430615 | 0.96117306 |
| ENSG00000171811 | CFAP46         | cilia and flagella associated protein 46           | 132808392 | 132942823 | - | 54777     | 10 | 8    | 29  | -1.86466429  | 0.00188854 | 0.18640307 |
| ENSG00000197748 | CFAP43         | cilia and flagella associated protein 43           | 104129888 | 104232362 | - | 80217     | 10 | 22   | 7   | 1.611910175  | 0.01319757 | 0.55984925 |
| ENSG00000172361 | CFAP53         | cilia and flagella associated protein 53           | 50227193  | 50266522  | - | 220136    | 18 | 18   | 4   | 2.112871213  | 0.00664724 | 0.38704964 |
| ENSG00000278500 | AC009336.2     | homeobox D4                                        | 176151085 | 176173097 | + | 3233      | 2  | 1    | 10  | -3.191574278 | 0.01395124 | 0.57317426 |
| ENSG00000064270 | ATP2C2         | ATPase secretory pathway Ca2+ transporting 2       | 84368527  | 84464187  | + | 9914      | 16 | 4    | 21  | -2.379140453 | 0.00169524 | 0.17655137 |
| ENSG00000259921 | AC022819.1     | NA                                                 | 99157231  | 99161140  | - | NA        | 15 | 6    | 0   | 5.603454913  | 0.03361661 | 0.8324078  |
| ENSG00000273366 | Z83851.2       | NA                                                 | 42278188  | 42278846  | + | NA        | 22 | 11   | 0   | 6.464372701  | 0.00126829 | 0.14621903 |
| ENSG00000233903 | Z83851.1       | NA                                                 | 42276355  | 42277052  | + | NA        | 22 | 14   | 4   | 1.753163615  | 0.03847433 | 0.90546426 |
| ENSG00000252361 | RNU6-118P      | NA                                                 | 62815966  | 62816067  | - | NA        | 11 | 1    | 8   | -2.874057027 | 0.04333145 | 0.95821355 |
| ENSG00000207954 | MIR138-1       | NA                                                 | 44114212  | 44114310  | + | 406929    | 3  | 17   | 3   | 2.431648679  | 0.00394482 | 0.29823018 |
| ENSG00000149328 | GLB1L2         | galactosidase beta 1 like 2                        | 134331874 | 134378341 | + | 89944     | 11 | 5    | 17  | -1.763187466 | 0.02315658 | 0.72522737 |
| ENSG00000231701 | BMS1P13        | NA                                                 | 65828120  | 65831696  | + | NA        | 9  | 37   | 14  | 1.371208154  | 0.005121   | 0.33119861 |
| ENSG00000196502 | SULT1A1        | sulfotransferase family 1A member 1                | 28605196  | 28623625  | - | 6817      | 16 | 2    | 14  | -2.755008525 | 0.00572059 | 0.35537281 |
| ENSG00000198010 | DLGAP2         | DLG associated protein 2                           | 737596    | 1708474   | + | 9228      | 8  | 11   | 2   | 2.366006025  | 0.02678048 | 0.77212427 |
| ENSG00000198075 | SULT1C4        | sulfotransferase family 1C member 4                | 108377911 | 108388057 | + | 27233     | 2  | 17   | 2   | 2.988259266  | 0.00118753 | 0.14474367 |
| ENSG00000259953 | AL138756.1     | NA                                                 | 112032555 | 112037730 | - | NA        | 9  | 16   | 46  | -1.539202002 | 0.00099317 | 0.12655611 |
| ENSG00000230606 | AC092683.1     | NA                                                 | 97416165  | 97433527  | - | NA        | 2  | 128  | 54  | 1.220149937  | 0.00010046 | 0.02831489 |
| ENSG00000226002 | GTF2IP14       | NA                                                 | 65084103  | 65100232  | + | NA        | 7  | 6    | 0   | 5.603454913  | 0.03361661 | 0.8324078  |
| ENSG0000026036  | RTEL1-TNFRSF6B | RTEL1-TNFRSF6B readthrough (NMD candidate)         | 63659300  | 63698684  | + | 100533107 | 20 | 21   | 45  | -1.117948314 | 0.01301803 | 0.55621169 |
| ENSG00000158423 | RIBC1          | RIB43A domain with coiled-coils 1                  | 53422690  | 53431120  | + | 158787    | X  | 2    | 11  | -2.410535462 | 0.02678048 | 0.77212427 |
| ENSG00000128408 | RIBC2          | RIB43A domain with coiled-coils 2                  | 45413691  | 45432496  | + | 26150     | 22 | 15   | 4   | 1.85184114   | 0.02504257 | 0.74870021 |
| ENSG00000235837 | AC073333.1     | NA                                                 | 16695871  | 16719898  | - | NA        | 7  | 9    | 1   | 2.998267012  | 0.02463495 | 0.74193929 |
| ENSG00000107796 | ACTA2          | actin, alpha 2, smooth muscle, aorta               | 88935074  | 88991339  | - | 59        | 10 | 94   | 208 | -1.167851098 | 1.68E-05   | 0.0082875  |
| ENSG00000268350 | FAM156A        | family with sequence similarity 156 member A       | 52926402  | 52995472  | - | 29057     | X  | 40   | 7   | 2.470704875  | 9.45E-06   | 0.00540875 |
| ENSG00000234062 | AL390879.2     | NA                                                 | 136909395 | 137021630 | + | NA        | X  | 11   | 2   | 2.366006025  | 0.02678048 | 0.77212427 |
| ENSG00000131196 | NFATC1         | nuclear factor of activated T cells 1              | 79395856  | 79529325  | + | 4772      | 18 | 81   | 184 | -1.20551438  | 1.77E-05   | 0.00856212 |
| ENSG00000238098 | ABCA17P        | NA                                                 | 2339150   | 2426699   | + | 650655    | 16 | 1    | 9   | -3.041533225 | 0.02463495 | 0.74193929 |
| ENSG00000119888 | EPCAM          | epithelial cell adhesion molecule                  | 47345158  | 47387601  | + | 4072      | 2  | 1    | 11  | -3.32747051  | 0.00788025 | 0.42560136 |
| ENSG00000108342 | CSF3           | colony stimulating factor 3                        | 40015361  | 40017813  | + | 1440      | 17 | 765  | 222 | 1.761259123  | 6.39E-14   | 7.24E-10   |
| ENSG00000186399 | GOLGA8R        | golgin A8 family member R                          | 30403740  | 30414162  | - | 101059918 | 15 | 36   | 16  | 1.140754835  | 0.01753535 | 0.59985518 |
| ENSG00000178115 | GOLGA8Q        | golgin A8 family member Q                          | 30552078  | 30562501  | + | 727909    | 15 | 1    | 17  | -3.94981458  | 0.00025279 | 0.0532408  |
| ENSG00000215014 | AL645728.1     | NA                                                 | 1574975   | 1577075   | + | NA        | 1  | 9    | 23  | -1.364409461 | 0.03063511 | 0.8324078  |
| ENSG00000259345 | AC013652.1     | NA                                                 | 38865322  | 39427195  | - | NA        | 15 | 3    | 17  | -2.47670325  | 0.00394482 | 0.29823018 |
| ENSG00000113946 | CLDN16         | claudin 16                                         | 190322541 | 190412143 | + | 10686     | 3  | 3    | 19  | -2.636067816 | 0.00148807 | 0.15991045 |
| ENSG00000162882 | HAAO           | 3-hydroxyanthranilate 3,4-dioxygenase              | 42767089  | 42792593  | - | 23498     | 2  | 0    | 7   | -5.844270205 | 0.01729787 | 0.5958645  |
| ENSG00000259066 | AL110118.2     | novel protein                                      | 93184973  | 93218586  | + | NA        | 14 | 12   | 3   | 1.93356416   | 0.04197539 | 0.95430001 |
| ENSG00000198780 | FAM169A        | family with sequence similarity 169 member A       | 74777574  | 74866951  | - | 26049     | 5  | 29   | 13  | 1.127027071  | 0.03350994 | 0.8324078  |
| ENSG00000165376 | CLDN2          | claudin 2                                          | 106900164 | 106930861 | + | 9075      | X  | 10   | 0   | 6.328502073  | 0.00242129 | 0.21443156 |
| ENSG00000235530 | AC087294.1     | NA                                                 | 21214331  | 21230035  | + | NA        | 17 | 12   | 0   | 6.588541422  | 0.00066721 | 0.09763777 |
| ENSG00000173805 | HAP1           | huntingtin associated protein 1                    | 41717742  | 41734644  | - | 9001      | 17 | 1    | 8   | -2.874057027 | 0.04333145 | 0.95821355 |
| ENSG00000278456 | AC015712.7     | NA                                                 | 100888472 | 100889106 | - | NA        | 15 | 0    | 7   | -5.844270205 | 0.01729787 | 0.5958645  |
| ENSG00000272808 | AC015712.6     | NA                                                 | 100849831 | 100865457 | + | 105369201 | 15 | 7    | 24  | -1.782377813 | 0.00616054 | 0.37408912 |
| ENSG00000212724 | KRTAP2-3       | keratin associated protein 2-3                     | 41059240  | 41060114  | - | 730755    | 17 | 123  | 46  | 1.393472944  | 1.15E-05   | 0.00615558 |
| ENSG00000234084 | AL049552.1     | NA                                                 | 135301568 | 135307158 | + | NA        | 6  | 10   | 1   | 3.148276849  | 0.01395124 | 0.57317426 |
| ENSG00000271032 | AC020907.4     | NA                                                 | 35014961  | 35025335  | - | NA        | 19 | 0    | 16  | -7.02272042  | 5.33E-05   | 0.0193511  |
| ENSG00000269688 | AC008982.2     | NA                                                 | 38844729  | 38845499  | - | NA        | 19 | 2    | 12  | -2.534725564 | 0.01608407 | 0.5958645  |
| ENSG00000187479 | C11orf96       | chromosome 11 open reading frame 96                | 43925342  | 43944338  | + | 387763    | 11 | 14   | 31  | -1.162747492 | 0.02943072 | 0.82585301 |
| ENSG00000234776 | C11orf94       | chromosome 11 open reading frame 94                | 45906513  | 45907282  | - | 143678    | 11 | 0    | 7   | -5.844270205 | 0.01729787 | 0.5958645  |
| ENSG00000180425 | C11orf71       | chromosome 11 open reading frame 71                | 114391443 | 114400511 | - | 54494     | 11 | 26   | 11  | 1.208737584  | 0.03246835 | 0.8324078  |
| ENSG00000115009 | CCL20          | C-C motif chemokine ligand 20                      | 227813842 | 227817564 | + | 6364      | 2  | 1327 | 308 | 2.083649442  | 8.91E-20   | 1.68E-15   |
| ENSG00000198870 | STKLD1         | serine/threonine kinase like domain containing 1   | 133376367 | 133406096 | + | 169436    | 9  | 7    | 29  | -2.054117182 | 0.00085779 | 0.11407959 |
| ENSG00000272787 | AC253536.6     | NA                                                 | 23969211  | 23969873  | + | NA        | 22 | 20   | 4   | 2.263871095  | 0.00268218 | 0.22748379 |
| ENSG00000253537 | PCDHGA7        | protocadherin gamma subfamily A, 7                 | 141382739 | 141512979 | + | 56108     | 5  | 72   | 145 | -1.031767758 | 0.00040464 | 0.07164054 |
| ENSG00000254245 | PCDHGA3        | protocadherin gamma subfamily A, 3                 | 141343829 | 141512979 | + | 56112     | 5  | 21   | 45  | -1.117948314 | 0.01301803 | 0.55621169 |
| ENSG00000204956 | PCDHGA1        | protocadherin gamma subfamily A, 1                 | 141330571 | 141512981 | + | 56114     | 5  | 10   | 29  | -1.547217154 | 0.00718023 | 0.41003926 |
| ENSG00000261934 | PCDHGA9        | protocadherin gamma subfamily A, 9                 | 141402932 | 141512979 | + | 56107     | 5  | 65   | 25  | 1.351094469  | 0.00048689 | 0.0804226  |
| ENSG00000156510 | HKDC1          | hexokinase domain containing 1                     | 69220303  | 69267559  | + | 80201     | 10 | 9    | 0   | 6.178492236  | 0.00464266 | 0.30691904 |
| ENSG00000254221 | PCDHGB1        | protocadherin gamma subfamily B, 1                 | 141350102 | 141512979 | + | 56104     | 5  | 0    | 7   | -5.844270205 | 0.01729787 | 0.5958645  |
| ENSG00000236431 | AC009237.8     | NA                                                 | 95536117  | 95536495  | - | NA        | 2  | 25   | 1   | 4.459393515  | 2.75E-06   | 0.00240045 |
| ENSG00000229689 | AC009237.3     | NA                                                 | 95525345  | 95532405  | + | NA        | 2  | 59   | 27  | 1.101149753  | 0.00459709 | 0.30691904 |
| ENSG00000279138 | AP002847.1     | NA                                                 | 104478539 | 104480783 | - | NA        | 8  | 17   | 5   | 1.717772741  | 0.02315658 | 0.72522737 |
| ENSG00000252130 | RNU6-1045P     | NA                                                 | 191370938 | 191371044 | + | NA        | 2  | 8    | 0   | 6.011054937  | 0.00894141 | 0.44242407 |
| ENSG00000102904 | TSNAXIP1       | translin associated factor X interacting protein 1 | 67806765  | 67832148  | + | 55815     | 16 | 15   | 45  | -1.599937435 | 0.00076491 | 0.10647629 |
| ENSG00000259363 | AC090825.1     | NA                                                 | 99807023  | 99877148  | + | 400464    | 15 | 36   | 12  | 1.552098752  | 0.0022933  | 0.21443156 |
| ENSG00000265194 | AL359922.2     | NA                                                 | 21858910  | 21861926  | - | NA        | 9  | 23   | 8   | 1.486180555  | 0.01731168 | 0.5958645  |
| ENSG00000116661 | FBXO2          | F-box protein 2                                    | 11637018  | 11655785  | - | 26232     | 1  | 9    | 23  | -1.364409461 | 0.03063511 | 0.8324078  |
| ENSG00000260874 | AC106820.5     | NA                                                 | 2456252   | 2459979   | - | 105371050 | 16 | 8    | 0   | 6.011054937  | 0.00894141 | 0.44242407 |
| ENSG00000135722 | FBXL8          | F-box and leucine rich repeat protein 8            | 67159931  | 67164570  | + | 55336     | 16 | 16   | 45  | -1.50757933  | 0.00133912 | 0.1511311  |
| ENSG00000266302 | AC098850.4     | novel transcript                                   | 16690261  | 16804453  | + | NA        | 17 | 14   | 0   | 6.808790704  | 0.000187   | 0.04333935 |
| ENSG00000214922 | HLA-F-AS1      | HLA-F-AS1                                          | 29726601  | 29749049  | - | 285830    | 6  | 17   | 36  | -1.099842418 | 0.02640494 | 0.77212427 |
| ENSG00000140987 | ZSCAN32        | zinc finger and SCAN domain containing 32          | 3382081   | 3401065   | - | 54925     | 16 | 11   | 0   | 6.464372701  | 0.00126829 | 0.14621903 |
| ENSG00000196812 | ZSCAN16        | zinc finger and SCAN domain containing 16          | 28124560  | 28130082  | + | 80345     | 6  | 15   | 32  | -1.109694026 | 0.03399614 | 0.83595983 |
| ENSG00000272148 | AC013403.2     | NA                                                 | 27062428  | 27062907  | - | NA        | 2  | 3    | 17  | -2.47670325  | 0.00394482 | 0.29823018 |
| ENSG00000116194 | ANGPTL1        | angiopoietin like 1                                | 178849705 | 178871052 | - |           |    |      |     |              |            |            |



|                 |             |                                                |           |           |   |           |    |      |      |              |            |            |
|-----------------|-------------|------------------------------------------------|-----------|-----------|---|-----------|----|------|------|--------------|------------|------------|
| ENSG00000162669 | HFM1        | HFM1, ATP dependent DNA helicase homolog       | 91260766  | 91404869  | - | 164045    | 1  | 2    | 10   | -2.27463923  | 0.04430615 | 0.96117306 |
| ENSG00000175305 | CCNE2       | cyclin E2                                      | 94879770  | 94896678  | - | 9134      | 8  | 110  | 50   | 1.112508706  | 0.00047696 | 0.07924308 |
| ENSG00000243440 | AF130351.1  | NA                                             | 14591930  | 14658821  | - | NA        | 21 | 11   | 2    | 2.366006025  | 0.02678048 | 0.77212427 |
| ENSG00000196366 | C9orf163    | NA                                             | 136483495 | 136486067 | + | NA        | 9  | 7    | 0    | 5.821602045  | 0.01729787 | 0.5958645  |
| ENSG00000279800 | BCLAF1P2    | NA                                             | 34266041  | 34268649  | - | NA        | 16 | 35   | 15   | 1.19262654   | 0.01490801 | 0.5958645  |
| ENSG00000249965 | CDC42P4     | NA                                             | 109555170 | 109555732 | + | NA        | 4  | 0    | 6    | -5.626056987 | 0.03361661 | 0.8324078  |
| ENSG00000146411 | SLC2A12     | solute carrier family 2 member 12              | 133988697 | 134052636 | - | 154091    | 6  | 18   | 40   | -1.16947784  | 0.01399964 | 0.57448933 |
| ENSG00000235204 | AL162724.2  | NA                                             | 124259250 | 124261156 | - | 613206    | 9  | 11   | 2    | 2.366006025  | 0.02678048 | 0.77212427 |
| ENSG00000134061 | CD180       | CD180 molecule                                 | 67179613  | 67196799  | - | 4064      | 5  | 6    | 0    | 5.603454913  | 0.03361661 | 0.8324078  |
| ENSG00000271192 | AC006058.2  | NA                                             | 43996896  | 43997443  | + | NA        | 3  | 0    | 6    | -5.626056987 | 0.03361661 | 0.8324078  |
| ENSG00000240270 | RPL12P37    | NA                                             | 80976454  | 80976948  | + | NA        | 17 | 1    | 8    | -2.874057027 | 0.04333145 | 0.95821355 |
| ENSG00000255471 | AP001528.2  | NA                                             | 86892214  | 86925037  | - | NA        | 11 | 25   | 11   | 1.152432339  | 0.04395748 | 0.96117306 |
| ENSG00000135929 | CYP27A1     | cytochrome P450 family 27 subfamily A member 1 | 218781749 | 218815293 | + | 1593      | 2  | 48   | 115  | -1.281373161 | 7.28E-05   | 0.02396741 |
| ENSG0000025039  | RRAGD       | Ras related GTP binding D                      | 89364636  | 89412270  | - | 58528     | 6  | 36   | 7    | 2.31920505   | 4.94E-05   | 0.01913526 |
| ENSG00000159212 | CLIC6       | chloride intracellular channel 6               | 34669389  | 34718227  | + | 54102     | 21 | 6    | 0    | 5.603454913  | 0.03361661 | 0.8324078  |
| ENSG00000155962 | CLIC2       | chloride intracellular channel 2               | 155276211 | 155334657 | - | 1193      | X  | 17   | 5    | 1.717772741  | 0.02315658 | 0.72522737 |
| ENSG00000278416 | PMS2P2      | NA                                             | 75344015  | 75359550  | - | NA        | 7  | 10   | 2    | 2.230135398  | 0.04430615 | 0.96117306 |
| ENSG00000226647 | AL365356.1  | NA                                             | 5712174   | 5744067   | - | NA        | 10 | 11   | 2    | 2.366006025  | 0.02678048 | 0.77212427 |
| ENSG00000103056 | SMPD3       | sphingomyelin phosphodiesterase 3              | 68358325  | 68448688  | - | 55512     | 16 | 16   | 2    | 2.90145966   | 0.00200946 | 0.19394578 |
| ENSG00000273419 | AC004877.1  | NA                                             | 149858400 | 149862492 | - | NA        | 7  | 7    | 0    | 5.821602045  | 0.01729787 | 0.5958645  |
| ENSG00000244588 | RAD21L1     | RAD21 cohesin complex component like 1         | 1226056   | 1296421   | + | 642636    | 20 | 4    | 21   | -2.379140453 | 0.00169524 | 0.17655137 |
| ENSG00000120217 | CD274       | CD274 molecule                                 | 5450503   | 5470566   | + | 29126     | 9  | 141  | 53   | 1.386475162  | 7.77E-06   | 0.00481643 |
| ENSG00000164161 | HHIP        | hedgehog interacting protein                   | 144646021 | 144745271 | + | 64399     | 4  | 4774 | 2306 | 1.026693614  | 9.44E-07   | 0.00106956 |
| ENSG00000259404 | EFTUD1P1    | NA                                             | 84080168  | 84126604  | + | NA        | 15 | 10   | 2    | 2.230135398  | 0.04430615 | 0.96117306 |
| ENSG00000244134 | RPS12P20    | NA                                             | 72708186  | 72708565  | + | NA        | 11 | 0    | 0    | -5.626056987 | 0.03361661 | 0.8324078  |
| ENSG00000242902 | FLNC-AS1    | NA                                             | 128850162 | 128862626 | - | 110806300 | 7  | 0    | 14   | -6.831659463 | 0.000187   | 0.04333935 |
| ENSG00000187372 | PCDHB13     | protocadherin beta 13                          | 141213919 | 141218979 | + | 56123     | 5  | 0    | 8    | -6.033772917 | 0.00894141 | 0.44242407 |
| ENSG00000253741 | AC108002.1  | NA                                             | 142702252 | 142726973 | - | 100288181 | 8  | 0    | 7    | -5.844270205 | 0.01729787 | 0.5958645  |
| ENSG00000117643 | MAN1C1      | mannosidase alpha class 1C member 1            | 25617468  | 25786207  | + | 57134     | 1  | 26   | 129  | -2.328271983 | 3.79E-11   | 1.53E-07   |
| ENSG00000176124 | DLEU1       | NA                                             | 50082171  | 50723236  | + | 10301     | 13 | 16   | 35   | -1.146141525 | 0.02294735 | 0.72307126 |
| ENSG00000231607 | DLEU2       | NA                                             | 49982552  | 50125720  | - | 8847      | 13 | 45   | 21   | 1.07200287   | 0.01301803 | 0.55621169 |
| ENSG00000261542 | AC011978.2  | NA                                             | 63215981  | 63218034  | + | NA        | 8  | 2    | 10   | -2.27463923  | 0.04430615 | 0.96117306 |
| ENSG00000155066 | PROM2       | prominin 2                                     | 95274453  | 95291308  | + | 150696    | 2  | 1    | 15   | -3.770634598 | 0.00079462 | 0.10718826 |
| ENSG00000249084 | AC027627.1  | NA                                             | 177343004 | 177357032 | + | NA        | 4  | 1    | 9    | -3.041533225 | 0.02463495 | 0.74193929 |
| ENSG00000278000 | AC139100.2  | NA                                             | 80161752  | 80162413  | + | NA        | 18 | 10   | 1    | 3.148276849  | 0.01395124 | 0.57317426 |
| ENSG00000245213 | AC105285.1  | NA                                             | 173131928 | 173169652 | - | 101930370 | 4  | 22   | 8    | 1.422407463  | 0.02463569 | 0.74193929 |
| ENSG00000175294 | CATSPER1    | cation channel sperm associated 1              | 66016752  | 66026517  | - | 117144    | 11 | 16   | 2    | 2.90145966   | 0.00200946 | 0.19394578 |
| ENSG00000264964 | AP001033.1  | NA                                             | 9315194   | 9334441   | - | NA        | 18 | 1    | 11   | -3.32747051  | 0.00788025 | 0.42560136 |
| ENSG00000184451 | CCR10       | C-C motif chemokine receptor 10                | 42678889  | 42683917  | - | 2826      | 17 | 11   | 34   | -1.639924777 | 0.00242152 | 0.21443156 |
| ENSG00000117707 | PROX1       | prospero homeobox 1                            | 213983181 | 214041502 | + | 5629      | 1  | 11   | 1    | 3.284147477  | 0.00788025 | 0.42560136 |
| ENSG00000241399 | CD302       | CD302 molecule                                 | 159768630 | 159798255 | - | 9936      | 2  | 47   | 108  | -1.221164613 | 0.00018742 | 0.04333935 |
| ENSG00000219902 | RPL35P3     | NA                                             | 105302453 | 105302823 | - | NA        | 6  | 6    | 0    | 5.603454913  | 0.03361661 | 0.8324078  |
| ENSG00000204314 | PRRT1       | proline rich transmembrane protein 1           | 32148359  | 32154373  | - | 80863     | 6  | 11   | 40   | -1.873603443 | 0.00030241 | 0.05969635 |
| ENSG00000167371 | PRRT2       | proline rich transmembrane protein 2           | 29811382  | 29815892  | + | 112476    | 16 | 10   | 29   | -1.547217154 | 0.00718023 | 0.41003926 |
| ENSG00000230212 | AP00688.1   | NA                                             | 36069642  | 36126640  | - | 100133286 | 21 | 0    | 12   | -6.611376502 | 0.00066721 | 0.09763777 |
| ENSG00000232907 | DLGAP4-AS1  | NA                                             | 36507702  | 36573391  | - | 101926987 | 20 | 6    | 0    | 5.603454913  | 0.03361661 | 0.8324078  |
| ENSG00000224687 | RASAL2-AS1  | NA                                             | 178091508 | 178093984 | - | 100302401 | 1  | 11   | 30   | -1.460051362 | 0.00916578 | 0.44650677 |
| ENSG00000167157 | PRRX2       | paired related homeobox 2                      | 129665641 | 129722674 | + | 51450     | 9  | 0    | 6    | -5.626056987 | 0.03361661 | 0.8324078  |
| ENSG00000248874 | C5orf17     | NA                                             | 23951348  | 24178263  | + | 439936    | 5  | 7    | 0    | 5.821602045  | 0.01729787 | 0.5958645  |
| ENSG00000236264 | RPL26P30    | NA                                             | 2335132   | 2335776   | - | NA        | 11 | 0    | 17   | -7.10953047  | 2.86E-05   | 0.01270536 |
| ENSG00000267249 | AP005482.3  | NA                                             | 12670426  | 12671145  | - | NA        | 18 | 1    | 9    | -3.041533225 | 0.02463495 | 0.74193929 |
| ENSG00000178776 | C5orf46     | chromosome 5 open reading frame 46             | 147880726 | 147906538 | - | 389336    | 5  | 61   | 21   | 1.509830133  | 0.00019769 | 0.04533635 |
| ENSG00000215217 | C5orf49     | chromosome 5 open reading frame 49             | 7830378   | 7851490   | - | 134121    | 5  | 16   | 1    | 3.819601112  | 0.00044798 | 0.07572067 |
| ENSG00000127241 | MASP1       | mannan binding lectin serine peptidase 1       | 187217285 | 187292022 | - | 5648      | 3  | 12   | 1    | 3.408316198  | 0.00444385 | 0.30691904 |
| ENSG00000213641 | RPL7AP4     | NA                                             | 55543401  | 55544169  | + | NA        | 14 | 0    | 7    | -5.844270205 | 0.01729787 | 0.5958645  |
| ENSG00000088882 | CPXM1       | carboxypeptidase X, M14 family member 1        | 2794069   | 2800637   | - | 56265     | 20 | 15   | 57   | -1.940139477 | 1.68E-05   | 0.0082875  |
| ENSG00000229029 | CDCA4P1     | NA                                             | 14593577  | 14594200  | + | NA        | 9  | 7    | 0    | 5.821602045  | 0.01729787 | 0.5958645  |
| ENSG00000176532 | PRR15       | proline rich 15                                | 29563811  | 29567295  | + | 222171    | 7  | 75   | 203  | -1.458049468 | 1.86E-07   | 0.00027661 |
| ENSG00000260018 | AC040169.1  | NA                                             | 84117051  | 84117571  | + | NA        | 16 | 7    | 0    | 5.821602045  | 0.01729787 | 0.5958645  |
| ENSG00000180525 | PRR26       | proline rich 26                                | 649948    | 669581    | + | 414235    | 10 | 7    | 0    | 5.821602045  | 0.01729787 | 0.5958645  |
| ENSG00000170166 | HOXD4       | homeobox D4                                    | 176151222 | 176153226 | + | 3233      | 2  | 19   | 3    | 2.590995634  | 0.00148807 | 0.15991045 |
| ENSG00000203497 | PDCD4-AS1   | NA                                             | 110869868 | 110872233 | - | NA        | 10 | 3    | 19   | -2.636067816 | 0.00148807 | 0.15991045 |
| ENSG00000258655 | ARHGAP5-AS1 | NA                                             | 32074946  | 32076793  | - | NA        | 14 | 13   | 42   | -1.705288106 | 0.00059128 | 0.09152773 |
| ENSG00000213638 | ADAT3       | adenosine deaminase, tRNA specific 3           | 1905378   | 1913447   | + | 113179    | 19 | 15   | 34   | -1.196829248 | 0.01970762 | 0.64839435 |
| ENSG00000272692 | AC010997.4  | NA                                             | 75409157  | 75411842  | + | NA        | 10 | 14   | 2    | 2.710424029  | 0.00572059 | 0.35537281 |
| ENSG00000283162 | AL390726.6  | NA                                             | 38433696  | 38543880  | + | NA        | 9  | 18   | 5    | 1.799645102  | 0.01534811 | 0.5958645  |
| ENSG00000257497 | AC121761.1  | NA                                             | 75483454  | 75489820  | - | NA        | 12 | 12   | 3    | 1.93356416   | 0.04197539 | 0.95430001 |
| ENSG00000235917 | MTCO2P11    | NA                                             | 5098341   | 5099325   | + | NA        | 9  | 6    | 0    | 5.603454913  | 0.03361661 | 0.8324078  |
| ENSG00000233223 | AC016876.1  | NA                                             | 7581964   | 7584072   | - | 100996842 | 17 | 23   | 9    | 1.318704357  | 0.03063511 | 0.8324078  |
| ENSG00000240163 | AC087385.1  | NA                                             | 60390371  | 60390682  | + | NA        | 15 | 9    | 0    | 6.178492236  | 0.00464266 | 0.30691904 |
| ENSG00000232450 | AL133517.1  | NA                                             | 113698884 | 113699631 | - | NA        | 1  | 4    | 16   | -1.989467105 | 0.0161862  | 0.5958645  |
| ENSG00000250569 | NTAN1P2     | NA                                             | 86481754  | 86483002  | - | NA        | 8  | 3    | 14   | -2.198832243 | 0.01657597 | 0.5958645  |
| ENSG00000224613 | AC095032.1  | NA                                             | 103418079 | 103525483 | - | NA        | 1  | 0    | 7    | -5.844270205 | 0.01729787 | 0.5958645  |
| ENSG00000272669 | AL021707.6  | NA                                             | 38742625  | 38743115  | + | NA        | 22 | 9    | 0    | 6.178492236  | 0.00464266 | 0.30691904 |
| ENSG00000154102 | C16orf74    | chromosome 16 open reading frame 74            | 85690084  | 85751129  | - | 404550    | 16 | 97   | 37   | 1.364432418  | 6.48E-05   | 0.02231598 |
| ENSG00000255585 | AL590627.1  | NA                                             | 137776539 | 137789235 | - | 651337    | 9  | 8    | 1    | 2.830829713  | 0.04333145 | 0.95821355 |

|                 |               |                                                |           |           |   |           |    |      |     |              |            |            |
|-----------------|---------------|------------------------------------------------|-----------|-----------|---|-----------|----|------|-----|--------------|------------|------------|
| ENSG00000238901 | snoU13        | NA                                             | 122671291 | 122671394 | + | NA        | 8  | 7    | 0   | 5.821602045  | 0.01729787 | 0.5958645  |
| ENSG00000238902 | snoU13        | NA                                             | 192534009 | 192534112 | - | NA        | 3  | 7    | 0   | 5.821602045  | 0.01729787 | 0.5958645  |
| ENSG00000238906 | snoU13        | NA                                             | 29912528  | 29912632  | + | NA        | 7  | 7    | 0   | 5.821602045  | 0.01729787 | 0.5958645  |
| ENSG00000239035 | snoU13        | NA                                             | 57278570  | 57278673  | - | 109616990 | 15 | 7    | 0   | 5.821602045  | 0.01729787 | 0.5958645  |
| ENSG00000239041 | snoU13        | NA                                             | 172691299 | 172691402 | + | NA        | 2  | 7    | 0   | 5.821602045  | 0.01729787 | 0.5958645  |
| ENSG00000239079 | snoU13        | NA                                             | 122726208 | 122726311 | - | NA        | 11 | 7    | 0   | 5.821602045  | 0.01729787 | 0.5958645  |
| ENSG00000239080 | snoU13        | NA                                             | 136134317 | 136134420 | - | NA        | X  | 7    | 0   | 5.821602045  | 0.01729787 | 0.5958645  |
| ENSG00000239093 | snoU13        | NA                                             | 187423315 | 187423419 | + | NA        | 3  | 7    | 0   | 5.821602045  | 0.01729787 | 0.5958645  |
| ENSG00000239096 | snoU13        | NA                                             | 179614775 | 179614878 | - | NA        | 3  | 7    | 0   | 5.821602045  | 0.01729787 | 0.5958645  |
| ENSG00000239129 | snoU13        | NA                                             | 29883006  | 29883109  | + | NA        | 17 | 7    | 0   | 5.821602045  | 0.01729787 | 0.5958645  |
| ENSG00000239137 | snoU13        | NA                                             | 55167171  | 55167274  | + | NA        | 19 | 7    | 0   | 5.821602045  | 0.01729787 | 0.5958645  |
| ENSG00000239153 | snoU13        | NA                                             | 115627082 | 115627185 | - | NA        | 11 | 7    | 0   | 5.821602045  | 0.01729787 | 0.5958645  |
| ENSG00000271922 | snoU13        | NA                                             | 154329716 | 154329819 | + | NA        | 3  | 7    | 0   | 5.821602045  | 0.01729787 | 0.5958645  |
| ENSG00000261150 | EPPK1         | epiplakin 1                                    | 143857324 | 143878464 | - | 83481     | 8  | 13   | 1   | 3.522639813  | 0.00250381 | 0.21723364 |
| ENSG00000280670 | CCDC163       | coiled-coil domain containing 163              | 45493866  | 45500079  | - | 126661    | 1  | 11   | 2   | 2.366006025  | 0.02678048 | 0.77212427 |
| ENSG00000187860 | CCDC157       | coiled-coil domain containing 157              | 30356635  | 30378658  | + | 550631    | 22 | 32   | 11  | 1.506992692  | 0.00474403 | 0.31072044 |
| ENSG00000228415 | PTMAP1        | NA                                             | 30633632  | 30633956  | + | NA        | 6  | 6    | 0   | 5.603454913  | 0.03361661 | 0.8324078  |
| ENSG00000185839 | AL035411.1    | NA                                             | 58630841  | 58631530  | - | NA        | 1  | 3    | 17  | -2.47670325  | 0.00394482 | 0.29823018 |
| ENSG00000196118 | CCDC189       | coiled-coil domain containing 189              | 30757423  | 30762710  | - | 90835     | 16 | 14   | 4   | 1.753163615  | 0.03847433 | 0.90546426 |
| ENSG00000209482 | SNORD83A      | NA                                             | 39315213  | 39315307  | - | 116937    | 22 | 2    | 12  | -2.534725564 | 0.01608407 | 0.5958645  |
| ENSG00000184162 | NR2C2AP       | nuclear receptor 2C2 associated protein        | 19201416  | 19203424  | - | 126382    | 19 | 25   | 56  | -1.182509797 | 0.00433438 | 0.30691904 |
| ENSG00000138944 | KIAA1644      | shisa like 1                                   | 44243667  | 44312851  | - | 85352     | 22 | 10   | 69  | -2.794195331 | 2.83E-09   | 7.28E-06   |
| ENSG00000171476 | HOPX          | HOP homeobox                                   | 56647988  | 56681899  | - | 84525     | 4  | 9    | 0   | 6.178492236  | 0.00464266 | 0.30691904 |
| ENSG00000145416 | 1-Mar         | membrane associated ring-CH-type finger 1      | 163524298 | 164384050 | - | 55016     | 4  | 139  | 63  | 1.117058569  | 0.00022405 | 0.04939223 |
| ENSG00000243404 | RPL35AP32     | NA                                             | 66446455  | 66446777  | - | NA        | 15 | 0    | 6   | -5.626056987 | 0.03361661 | 0.8324078  |
| ENSG00000258311 | AC009779.3    | BLOC1S1-RDH5 readthrough                       | 55716036  | 55724703  | + | NA        | 12 | 0    | 11  | -6.4871864   | 0.00126829 | 0.14621903 |
| ENSG00000225358 | MIPEPP1       | NA                                             | 112735166 | 112738693 | - | NA        | 7  | 6    | 0   | 5.603454913  | 0.03361661 | 0.8324078  |
| ENSG00000265321 | MIR4263       | NA                                             | 27996367  | 27996449  | + | 100422965 | 2  | 0    | 15  | -6.930350488 | 9.96E-05   | 0.02829695 |
| ENSG00000230309 | AL121718.1    | NA                                             | 78604467  | 78606036  | - | NA        | 6  | 33   | 14  | 1.206742273  | 0.01669856 | 0.5958645  |
| ENSG00000261770 | AC006504.1    | NA                                             | 27757184  | 27760849  | - | NA        | 19 | 32   | 7   | 2.149908886  | 0.00025475 | 0.05325746 |
| ENSG00000281468 | AC006504.8    | NA                                             | 27802838  | 27803472  | + | NA        | 19 | 41   | 16  | 1.327768073  | 0.00432459 | 0.30691904 |
| ENSG00000231443 | AC124944.2    | NA                                             | 195937243 | 195938739 | + | NA        | 3  | 14   | 0   | 6.808790704  | 0.000187   | 0.04333935 |
| ENSG00000258096 | AC025031.2    | NA                                             | 46371463  | 46373778  | + | NA        | 12 | 3    | 23  | -2.910074476 | 0.000207   | 0.04672245 |
| ENSG00000168970 | JMJD7-PLA2G4B | JMJD7-PLA2G4B readthrough                      | 41828095  | 41848155  | + | 8681      | 15 | 2    | 10  | -2.27463923  | 0.04430615 | 0.96117306 |
| ENSG00000260618 | AC025917.1    | NA                                             | 52577842  | 52598709  | + | NA        | 15 | 13   | 30  | -1.221559025 | 0.02513009 | 0.75052463 |
| ENSG00000268262 | AC011445.1    | NA                                             | 39314651  | 39320858  | - | NA        | 19 | 1    | 8   | -2.874057027 | 0.04333145 | 0.95821355 |
| ENSG00000132470 | ITGB4         | integrin subunit beta 4                        | 75721328  | 75757818  | + | 3691      | 17 | 22   | 67  | -1.62415901  | 6.50E-05   | 0.02231598 |
| ENSG00000188092 | GPR89B        | G protein-coupled receptor 89B                 | 147928393 | 147993521 | + | 51463     | 1  | 125  | 247 | -1.004926477 | 0.00011156 | 0.03083193 |
| ENSG00000105855 | ITGB8         | integrin subunit beta 8                        | 20330702  | 20415754  | + | 3696      | 7  | 119  | 262 | -1.160834076 | 8.24E-06   | 0.00498038 |
| ENSG00000256001 | AC079949.1    | NA                                             | 127145072 | 127146532 | - | NA        | 12 | 28   | 8   | 1.768569201  | 0.00275824 | 0.23217626 |
| ENSG00000261002 | AC036103.1    | NA                                             | 42208413  | 42226990  | + | NA        | 15 | 10   | 1   | 3.148276849  | 0.01395124 | 0.57317426 |
| ENSG00000091409 | ITGA6         | integrin subunit alpha 6                       | 172427354 | 172506282 | + | 3655      | 2  | 1009 | 485 | 1.03360792   | 2.95E-06   | 0.00249836 |
| ENSG00000236393 | AC091806.1    | NA                                             | 40262917  | 40287720  | + | 101927476 | X  | 23   | 8   | 1.486180555  | 0.01731168 | 0.5958645  |
| ENSG00000184068 | AL021453.1    | NA                                             | 41831215  | 41834665  | - | NA        | 22 | 14   | 36  | -1.377677655 | 0.00691861 | 0.39956564 |
| ENSG00000245552 | AP000787.1    | NA                                             | 95150539  | 95234104  | + | 101929295 | 11 | 8    | 20  | -1.33137288  | 0.04895303 | 1          |
| ENSG00000155792 | DEPTOR        | DEP domain containing MTOR interacting protein | 119873717 | 120050913 | + | 64798     | 8  | 28   | 11  | 1.315155718  | 0.01741971 | 0.59776732 |
| ENSG00000235448 | LURAP1L-AS1   | NA                                             | 12700100  | 12814345  | - | 101929467 | 9  | 20   | 8   | 1.285725268  | 0.04895303 | 1          |
| ENSG00000206754 | SNORD101      | NA                                             | 132815307 | 132815379 | + | 594837    | 6  | 10   | 2   | 2.230135398  | 0.04430615 | 0.96117306 |
| ENSG00000267048 | AC092143.4    | NA                                             | 89906157  | 89918233  | + | NA        | 16 | 0    | 6   | -5.626056987 | 0.03361661 | 0.8324078  |
| ENSG00000230882 | AC005077.4    | NA                                             | 76071469  | 76074963  | - | NA        | 7  | 10   | 0   | 6.328502073  | 0.00242129 | 0.21443156 |
| ENSG00000235681 | AC245884.3    | NA                                             | 54446830  | 54447047  | + | NA        | 19 | 15   | 1   | 3.727243006  | 0.00079462 | 0.10718826 |
| ENSG00000242110 | AMACR         | alpha-methylacyl-CoA racemase                  | 33986178  | 34008108  | - | 23600     | 5  | 0    | 6   | -5.626056987 | 0.03361661 | 0.8324078  |
| ENSG00000232909 | AL157823.2    | NA                                             | 35733867  | 35736947  | - | NA        | 6  | 7    | 26  | -1.897284484 | 0.00282728 | 0.23551614 |
| ENSG00000176681 | LRRC37A       | leucine rich repeat containing 37A             | 46292733  | 46337794  | + | 9884      | 17 | 38   | 14  | 1.409553447  | 0.00377845 | 0.29183059 |
| ENSG00000280916 | FOXCI         | NA                                             | 1605531   | 1606079   | + | NA        | 6  | 0    | 9   | -6.201249115 | 0.00464266 | 0.30691904 |
| ENSG00000234076 | TPRG1-AS1     | NA                                             | 188941715 | 188947639 | - | 100874043 | 3  | 6    | 0   | 5.603454913  | 0.03361661 | 0.8324078  |
| ENSG00000184792 | OSBP2         | oxysterol binding protein 2                    | 30693782  | 30907824  | + | 23762     | 22 | 46   | 12  | 1.904641422  | 7.67E-05   | 0.02458115 |
| ENSG00000229956 | ZRANB2-AS2    | NA                                             | 71081324  | 71489976  | + | 100852410 | 1  | 1    | 12  | -3.451660612 | 0.00444385 | 0.30691904 |
| ENSG00000264425 | MIR4653       | NA                                             | 101159473 | 101159555 | + | 100616117 | 7  | 1    | 11  | -3.32747051  | 0.00788025 | 0.42560136 |
| ENSG00000116299 | KIAA1324      | KIAA1324                                       | 109113679 | 109206781 | + | 57535     | 1  | 8    | 22  | -1.46806803  | 0.02463569 | 0.74193929 |
| ENSG00000168811 | IL12A         | interleukin 12A                                | 159988750 | 159996019 | + | 3592      | 3  | 19   | 7   | 1.401702691  | 0.03970312 | 0.92328994 |
| ENSG00000228492 | RAB11FIP1P1   | NA                                             | 74202834  | 74204595  | + | NA        | X  | 26   | 11  | 1.208737584  | 0.03246835 | 0.8324078  |
| ENSG00000231999 | LRRC8C-DT     | NA                                             | 89583241  | 89632894  | - | 400761    | 1  | 9    | 0   | 6.178492236  | 0.00464266 | 0.30691904 |
| ENSG00000269161 | AC010618.2    | NA                                             | 17518330  | 17520565  | - | NA        | 19 | 0    | 7   | -5.844270205 | 0.01729787 | 0.5958645  |
| ENSG00000260236 | AC099778.1    | NA                                             | 47379089  | 47380999  | - | NA        | 3  | 23   | 9   | 1.318704357  | 0.03063511 | 0.8324078  |
| ENSG00000253174 | AC009630.2    | NA                                             | 41540381  | 41545044  | - | NA        | 8  | 10   | 0   | 6.328502073  | 0.00242129 | 0.21443156 |
| ENSG00000256006 | AC084117.1    | NA                                             | 18405609  | 18406731  | + | NA        | 11 | 14   | 0   | 6.808790704  | 0.000187   | 0.04333935 |
| ENSG00000163531 | NFASC         | neurofascin                                    | 204828651 | 205022822 | + | 23114     | 1  | 18   | 4   | 2.112871213  | 0.00664724 | 0.38704964 |
| ENSG00000259450 | AC113146.2    | NA                                             | 39188438  | 39194309  | - | NA        | 15 | 9    | 22  | -1.300630732 | 0.04253884 | 0.95821355 |
