# Supplementary material for: The circ_0002538/miR-138-5p/plasmolipin axis regulates Schwann cell migration and myelination in diabetic peripheral neuropathy
Source: PubMed Central journal article supplement — Neural Regen Res. 2022 Oct 11;18(7):1591–600. doi: 10.4103/1673-5374.355979 (PMC10075099; doi:10.4103/1673-5374.355979), 2022-10-11
Supplement: NRR-18-1591_Suppl5.pdf [file NRR-18-1591_Suppl5.pdf]

**Additional Table 11 GO biological process analysis of filtered mRNAs**

| ONTOLOGY | GOID       | Description                                   | GeneRatio | BgRatio   | pvalue     | p.adjust   | geneID                                                                                                                                                                                                       | Count |
|----------|------------|-----------------------------------------------|-----------|-----------|------------|------------|--------------------------------------------------------------------------------------------------------------------------------------------------------------------------------------------------------------|-------|
| BP       | GO:0030198 | extracellular matrix organization             | 30/632    | 335/17293 | 6.10E-06   | 0.01366842 | COL14A1/COL19A1/ICAM5/MMP3/MMP8/RGCC/TMPRS<br>S6/SFRP2/MADCAM1/A2M/ELN/COL5A3/COL4A3/ADA<br>MTS14/MMP10/VWF/TLL2/SPINT2/SPINT1/SULF1/TNFRS<br>F11B/LCP1/MELTF/KAZALD1/CPB2/MFAP4/MATN3/ITGB<br>4/ITGB8/ITGA6 | 30    |
| BP       | GO:0043062 | extracellular structure organization          | 30/632    | 336/17293 | 6.47E-06   | 0.01366842 | COL14A1/COL19A1/ICAM5/MMP3/MMP8/RGCC/TMPRS<br>S6/SFRP2/MADCAM1/A2M/ELN/COL5A3/COL4A3/ADA<br>MTS14/MMP10/VWF/TLL2/SPINT2/SPINT1/SULF1/TNFRS<br>F11B/LCP1/MELTF/KAZALD1/CPB2/MFAP4/MATN3/ITGB<br>4/ITGB8/ITGA6 | 30    |
| BP       | GO:0002687 | positive regulation of leukocyte migration    | 16/632    | 123/17293 | 1.05E-05   | 0.01479395 | CXCL11/TRPV4/TMEM102/IL1A/EDN1/MADCAM1/NCKA<br>P1L/IL6/CXCL6/CXCL8/CXCL1/CXCL3/CXCL5/CCL7/CCL2<br>0/IL12A                                                                                                    | 16    |
| BP       | GO:1902624 | positive regulation of neutrophil migration   | 8/632     | 32/17293  | 1.47E-05   | 0.01553177 | IL1A/EDN1/NCKAP1L/CXCL6/CXCL8/CXCL1/CXCL3/CXCL<br>5                                                                                                                                                          | 8     |
| BP       | GO:0002690 | positive regulation of leukocyte chemotaxis   | 13/632    | 89/17293  | 2.01E-05   | 0.01694991 | CXCL11/TRPV4/TMEM102/EDN1/NCKAP1L/IL6/CXCL6/C<br>XCL8/CXCL1/CXCL3/CXCL5/CCL7/IL12A                                                                                                                           | 13    |
| BP       | GO:0070098 | chemokine-mediated signaling pathway          | 12/632    | 79/17293  | 2.79E-05   | 0.01961958 | GPR35/CXCL11/EDN1/CXCL6/CXCL8/CXCL1/CXCL3/CXC<br>L5/SLIT3/CCL7/CCL20/CCR10                                                                                                                                   | 12    |
| BP       | GO:0060078 | regulation of postsynaptic membrane potential | 16/632    | 136/17293 | 3.74E-05   | 0.02258031 | CHRNE/ADRB2/CHRNA10/TMEM108/GRID2/GRIK5/PPP1<br>R9A/SCN1A/SCN3B/SCN3A/P2RX6/GHRL/GRIN2C/GRIN<br>2D/GRIN3A/RIMS1                                                                                              | 16    |
| BP       | GO:1902622 | regulation of neutrophil migration            | 8/632     | 37/17293  | 4.60E-05   | 0.02425682 | IL1A/EDN1/NCKAP1L/CXCL6/CXCL8/CXCL1/CXCL3/CXCL<br>5                                                                                                                                                          | 8     |
| BP       | GO:1990266 | neutrophil migration                          | 13/632    | 99/17293  | 6.32E-05   | 0.02580111 | TREM1/IL1A/IL1B/EDN1/NCKAP1L/CXADR/CXCL6/CXCL8<br>/CXCL1/CXCL3/CXCL5/CCL7/CCL20                                                                                                                              | 13    |
| BP       | GO:0090023 | positive regulation of neutrophil chemotaxis  | 7/632     | 29/17293  | 6.51E-05   | 0.02580111 | EDN1/NCKAP1L/CXCL6/CXCL8/CXCL1/CXCL3/CXCL5                                                                                                                                                                   | 7     |
| BP       | GO:0010876 | lipid localization                            | 30/632    | 380/17293 | 6.72E-05   | 0.02580111 | SLC10A4/C3/RBP4/IL1B/TMEM30B/EDN1/ERFE/PROCA1/<br>APOE/MFSD2A/SLCO2A1/ABCB4/FABP3/ABCC2/ACVR1<br>C/IL6/SPNS2/NR1H3/REN/SPX/GHRL/B4GALNT1/ESYT3/<br>CES1/CETP/PITPNM3/SLC27A5/ATP10B/LRAT/OSBP2               | 30    |
| BP       | GO:0060079 | excitatory postsynaptic potential             | 13/632    | 101/17293 | 7.80E-05   | 0.02692908 | CHRNE/ADRB2/CHRNA10/TMEM108/GRID2/GRIK5/PPP1<br>R9A/P2RX6/GHRL/GRIN2C/GRIN2D/GRIN3A/RIMS1                                                                                                                    | 13    |
| BP       | GO:0030593 | neutrophil chemotaxis                         | 12/632    | 88/17293  | 8.29E-05   | 0.02692908 | TREM1/IL1B/EDN1/NCKAP1L/CXADR/CXCL6/CXCL8/CXC<br>L1/CXCL3/CXCL5/CCL7/CCL20                                                                                                                                   | 12    |
| BP       | GO:0071624 | positive regulation of granulocyte chemotaxis | 7/632     | 32/17293  | 0.00012768 | 0.03851326 | EDN1/NCKAP1L/CXCL6/CXCL8/CXCL1/CXCL3/CXCL5                                                                                                                                                                   | 7     |
| BP       | GO:0097530 | granulocyte migration                         | 14/632    | 122/17293 | 0.00014777 | 0.04030041 | TREM1/TRPV4/IL1A/IL1B/EDN1/NCKAP1L/CXADR/CXCL6<br>/CXCL8/CXCL1/CXCL3/CXCL5/CCL7/CCL20                                                                                                                        | 14    |
| BP       | GO:0071621 | granulocyte chemotaxis                        | 13/632    | 108/17293 | 0.00015594 | 0.04030041 | TREM1/TRPV4/IL1B/EDN1/NCKAP1L/CXADR/CXCL6/CXC<br>L8/CXCL1/CXCL3/CXCL5/CCL7/CCL20                                                                                                                             | 13    |
| BP       | GO:0002688 | regulation of leukocyte chemotaxis            | 13/632    | 109/17293 | 0.00017126 | 0.04030041 | CXCL11/TRPV4/TMEM102/EDN1/NCKAP1L/IL6/CXCL6/C<br>XCL8/CXCL1/CXCL3/CXCL5/CCL7/IL12A                                                                                                                           | 13    |
| BP       | GO:0002685 | regulation of leukocyte migration             | 17/632    | 171/17293 | 0.00018055 | 0.04030041 | CXCL11/TRPV4/GCSAM/TMEM102/IL1A/EDN1/MADCA<br>M1/NCKAP1L/IL6/CXCL6/CXCL8/CXCL1/CXCL3/CXCL5/C<br>CL7/CCL20/IL12A                                                                                              | 17    |
| BP       | GO:0042107 | cytokine metabolic process                    | 13/632    | 110/17293 | 0.00018785 | 0.04030041 | TREM1/IL1A/IL1B/INHA/EBI3/CARD11/EREG/INPP5D/IL6/<br>TLR1/GHRL/TNFRSF13C/CCL20                                                                                                                               | 13    |
| BP       | GO:0090022 | regulation of neutrophil chemotaxis           | 7/632     | 34/17293  | 0.00019152 | 0.04030041 | EDN1/NCKAP1L/CXCL6/CXCL8/CXCL1/CXCL3/CXCL5                                                                                                                                                                   | 7     |

|    |            |                                                      |        |           |            |            |                                                                                                                                                                |    |
|----|------------|------------------------------------------------------|--------|-----------|------------|------------|----------------------------------------------------------------------------------------------------------------------------------------------------------------|----|
| BP | GO:0045408 | regulation of interleukin-6 biosynthetic process     | 5/632  | 16/17293  | 0.0002004  | 0.04030041 | IL1B/EREG/INPP5D/TLR1/GHRL                                                                                                                                     | 5  |
| BP | GO:0042035 | regulation of cytokine biosynthetic process          | 12/632 | 97/17293  | 0.00021351 | 0.04098458 | IL1A/IL1B/INHA/EBI3/CARD11/EREG/INPP5D/IL6/TLR1/GHRL/TNFRSF13C/CCL20                                                                                           | 12 |
| BP | GO:0002237 | response to molecule of bacterial origin             | 26/632 | 332/17293 | 0.00022945 | 0.04212908 | TRIB1/SLC11A1/CXCL11/TNIP3/IL1B/CMPK2/EDN1/TNFRSF9/NLRP3/ABCC2/IL6/CXCL6/CXCL8/CXCL1/CXCL3/CXCL5/NR1H3/REN/TLR1/HAVCR2/TNFRSF11B/CYP1A1/CSF3/CCL20/CD180/IL12A | 26 |
| BP | GO:0032496 | response to lipopolysaccharide                       | 25/632 | 316/17293 | 0.00025779 | 0.04494116 | TRIB1/SLC11A1/CXCL11/TNIP3/IL1B/CMPK2/EDN1/TNFRSF9/NLRP3/ABCC2/IL6/CXCL6/CXCL8/CXCL1/CXCL3/CXCL5/NR1H3/REN/HAVCR2/TNFRSF11B/CYP1A1/CSF3/CCL20/CD180/IL12A      | 25 |
| BP | GO:0099565 | chemical synaptic transmission, postsynaptic         | 13/632 | 114/17293 | 0.00026876 | 0.04494116 | CHRNE/ADRB2/CHRNA10/TMEM108/GRID2/GRIK5/PPP1R9A/P2RX6/GHRL/GRIN2C/GRIN2D/GRIN3A/RIMS1                                                                          | 13 |
| BP | GO:0032103 | positive regulation of response to external stimulus | 23/632 | 281/17293 | 0.00027669 | 0.04494116 | C3/CXCL11/PTGER3/TRPV4/TMEM102/IL1B/EDN1/NCKAP1L/FABP4/IL6/CXCL6/CXCL8/CXCL1/CXCL3/CXCL5/GHRL/TUBB2B/CCL7/HAVCR2/CPB2/GPRC5B/CD180/IL12A                       | 23 |
| BP | GO:0050921 | positive regulation of chemotaxis                    | 14/632 | 132/17293 | 0.00033883 | 0.05299557 | CXCL11/TRPV4/TMEM102/EDN1/NCKAP1L/IL6/CXCL6/CXCL8/CXCL1/CXCL3/CXCL5/TUBB2B/CCL7/IL12A                                                                          | 14 |
| BP | GO:0050673 | epithelial cell proliferation                        | 27/632 | 361/17293 | 0.00036523 | 0.05386945 | SERPINF1/RGCC/EREG/ESR1/SFRP2/WNT16/APOE/AREG/SOX2/FLT4/EHF/IL6/OSR2/NOG/BCL11B/NR4A1/SFN/ESRP2/LIMS2/GHRL/TP63/MIR132/SULF1/IGFBP5/CPB2/PROX1/EPPK1           | 27 |
| BP | GO:0042226 | interleukin-6 biosynthetic process                   | 5/632  | 18/17293  | 0.00036993 | 0.05386945 | IL1B/EREG/INPP5D/TLR1/GHRL                                                                                                                                     | 5  |
| BP | GO:0071622 | regulation of granulocyte chemotaxis                 | 8/632  | 50/17293  | 0.00042074 | 0.05730006 | TRPV4/EDN1/NCKAP1L/CXCL6/CXCL8/CXCL1/CXCL3/CXCL5                                                                                                               | 8  |
| BP | GO:0044236 | multicellular organism metabolic process             | 15/632 | 151/17293 | 0.00042905 | 0.05730006 | COL19A1/ADRB2/MMP3/MMP8/TRPV4/RGCC/TMPRSS6/COL25A1/IL6/COL5A3/COL4A3/ADAMTS14/MMP10/UCN/MFAP4                                                                  | 15 |
| BP | GO:0006869 | lipid transport                                      | 26/632 | 347/17293 | 0.00045349 | 0.05730006 | SLC10A4/RBP4/IL1B/TMEM30B/EDN1/ERFE/PROCA1/APOE/MFSD2A/SLCO2A1/ABCB4/FABP3/ABCC2/SPNS2/NR1H3/REN/SPX/GHRL/ESYT3/CES1/CETP/PITPNM3/SLC27A5/ATP10B/LRAT/OSBP2    | 26 |
| BP | GO:0050873 | brown fat cell differentiation                       | 7/632  | 39/17293  | 0.0004674  | 0.05730006 | ADRB2/TRPV4/RGS2/NUDT7/FNDC5/FABP4/ITGA6                                                                                                                       | 7  |
| BP | GO:0015908 | fatty acid transport                                 | 11/632 | 91/17293  | 0.00047452 | 0.05730006 | IL1B/EDN1/ERFE/PROCA1/APOE/MFSD2A/SLCO2A1/FABP3/ABCC2/SPX/SLC27A5                                                                                              | 11 |
| BP | GO:0014831 | gastro-intestinal system smooth muscle contraction   | 4/632  | 11/17293  | 0.0004749  | 0.05730006 | PTGER3/SPX/GHRL/SULF1                                                                                                                                          | 4  |
| BP | GO:0042089 | cytokine biosynthetic process                        | 12/632 | 108/17293 | 0.00058055 | 0.06810118 | IL1A/IL1B/INHA/EBI3/CARD11/EREG/INPP5D/IL6/TLR1/GHRL/TNFRSF13C/CCL20                                                                                           | 12 |
| BP | GO:0015718 | monocarboxylic acid transport                        | 15/632 | 156/17293 | 0.00060594 | 0.06898005 | SLC10A4/TRPC4/IL1B/EDN1/ERFE/PROCA1/APOE/MFSD2A/SLCO2A1/ABCB4/FABP3/ABCC2/SLC16A11/SPX/SLC27A5                                                                 | 15 |
| BP | GO:0071219 | cellular response to molecule of bacterial origin    | 16/632 | 173/17293 | 0.00062071 | 0.06898005 | TRIB1/TNIP3/IL1B/CMPK2/NLRP3/ABCC2/IL6/CXCL6/CXCL8/NR1H3/TLR1/HAVCR2/CSF3/CCL20/CD180/IL12A                                                                    | 16 |
| BP | GO:0032963 | collagen metabolic process                           | 13/632 | 125/17293 | 0.00065905 | 0.07136345 | COL19A1/MMP3/MMP8/RGCC/TMPRSS6/COL25A1/IL6/COL5A3/COL4A3/ADAMTS14/MMP10/UCN/MFAP4                                                                              | 13 |
| BP | GO:0030574 | collagen catabolic process                           | 9/632  | 68/17293  | 0.00078954 | 0.08262954 | COL19A1/MMP3/MMP8/TMPRSS6/COL25A1/COL5A3/COL4A3/ADAMTS14/MMP10                                                                                                 | 9  |
| BP | GO:0007130 | synaptonemal complex assembly                        | 5/632  | 21/17293  | 0.00080223 | 0.08262954 | SYCE1/SYCP2/HORMAD1/MEIOC/RAD21L1                                                                                                                              | 5  |

|    |            |                                                                    |        |           |            |            |                                                                                                                                                                     |    |
|----|------------|--------------------------------------------------------------------|--------|-----------|------------|------------|---------------------------------------------------------------------------------------------------------------------------------------------------------------------|----|
| BP | GO:0071216 | cellular response to biotic stimulus                               | 17/632 | 195/17293 | 0.00083313 | 0.0837691  | TRIB1/TNIP3/IL1B/CMPK2/NLRP3/ABCB4/ABCC2/IL6/CXCL6/CXCL8/NR1H3/TLR1/HAVCR2/CSF3/CCL20/CD180/IL12A                                                                   | 17 |
| BP | GO:0032370 | positive regulation of lipid transport                             | 8/632  | 56/17293  | 0.00091873 | 0.09022762 | IL1B/EDN1/ERFE/APOE/ABCB4/NR1H3/GHRL/LRAT                                                                                                                           | 8  |
| BP | GO:0044259 | multicellular organismal macromolecule metabolic process           | 13/632 | 130/17293 | 0.00095398 | 0.09108093 | COL19A1/MMP3/MMP8/RGCC/TMPRSS6/COL25A1/IL6/COL5A3/COL4A3/ADAMTS14/MMP10/UCN/MFAP4                                                                                   | 13 |
| BP | GO:0060601 | lateral sprouting from an epithelium                               | 4/632  | 13/17293  | 0.00097055 | 0.09108093 | CELSR1/NOG/TP63/SULF1                                                                                                                                               | 4  |
| BP | GO:0071222 | cellular response to lipopolysaccharide                            | 15/632 | 165/17293 | 0.00108206 | 0.09757198 | TRIB1/TNIP3/IL1B/CMPK2/NLRP3/ABCC2/IL6/CXCL6/CXCL8/NR1H3/HAVCR2/CSF3/CCL20/CD180/IL12A                                                                              | 15 |
| BP | GO:0046717 | acid secretion                                                     | 12/632 | 116/17293 | 0.0010998  | 0.09757198 | TRPC4/PTGER3/IL1B/EDN1/PROCA1/SGK1/ABCB4/SLC1A2/ABCC2/UCN/GHRL/RIMS1                                                                                                | 12 |
| BP | GO:0010574 | regulation of vascular endothelial growth factor production        | 6/632  | 33/17293  | 0.00110904 | 0.09757198 | C3/IL1A/IL1B/FLT4/IL6/SULF1                                                                                                                                         | 6  |
| BP | GO:0030595 | leukocyte chemotaxis                                               | 17/632 | 201/17293 | 0.00116557 | 0.1004535  | TREM1/CXCL11/TRPV4/TMEM102/IL1B/EDN1/NCKAP1L/IL6/CXADR/CXCL6/CXCL8/CXCL1/CXCL3/CXCL5/CCL7/CCL20/IL12A                                                               | 17 |
| BP | GO:0006688 | glycosphingolipid biosynthetic process                             | 5/632  | 23/17293  | 0.00124872 | 0.10458836 | ST8SIA4/ST8SIA1/B3GALT2/B3GALT1/B4GALNT1                                                                                                                            | 5  |
| BP | GO:0008277 | regulation of G-protein coupled receptor protein signaling pathway | 13/632 | 134/17293 | 0.00126308 | 0.10458836 | C3/ADRB2/RAMP1/RGS2/EDN1/ACPP/RPH3AL/RGS16/RGS11/CXCL8/SYP/NECAB2/PDE6G                                                                                             | 13 |
| BP | GO:0098742 | cell-cell adhesion via plasma-membrane adhesion molecules          | 19/632 | 239/17293 | 0.00128853 | 0.10464391 | AMIGO2/DSC2/DSC3/CELSR1/CADM3/CADM2/SDK1/GRID2/CXADR/CDH6/EPCAM/CLDN16/CLDN2/PCDHGA7/PCDHGA3/PCDHGA1/PCDHGA9/PCDHGB1/PCDHB13                                        | 19 |
| BP | GO:0042108 | positive regulation of cytokine biosynthetic process               | 8/632  | 60/17293  | 0.00145647 | 0.1160505  | IL1A/IL1B/EBI3/CARD11/EREG/TLR1/TNFRSF13C/CCL20                                                                                                                     | 8  |
| BP | GO:0010573 | vascular endothelial growth factor production                      | 6/632  | 35/17293  | 0.00152779 | 0.11750911 | C3/IL1A/IL1B/FLT4/IL6/SULF1                                                                                                                                         | 6  |
| BP | GO:0070193 | synaptonemal complex organization                                  | 5/632  | 24/17293  | 0.00153043 | 0.11750911 | SYCE1/SYCP2/HORMAD1/MEIOC/RAD21L1                                                                                                                                   | 5  |
| BP | GO:0023061 | signal release                                                     | 28/632 | 421/17293 | 0.00175088 | 0.12723143 | TRIM9/EXOC3L1/TRPV4/SNCAIP/RBP4/IL1B/INHA/SLC18A2/EDN1/KCNG2/ANO1/RAPGEF4/GRIK5/ACVR1C/SYN2/STX11/IL6/PPP1R9A/LIF/REN/UCN/SYT17/SYTL3/GHRL/BAIAP3/SMPD3/RIMS1/RIMS3 | 28 |
| BP | GO:0044243 | multicellular organismal catabolic process                         | 9/632  | 76/17293  | 0.00176347 | 0.12723143 | COL19A1/MMP3/MMP8/TMPRSS6/COL25A1/COL5A3/COL4A3/ADAMTS14/MMP10                                                                                                      | 9  |
| BP | GO:1905954 | positive regulation of lipid localization                          | 9/632  | 76/17293  | 0.00176347 | 0.12723143 | C3/IL1B/EDN1/ERFE/APOE/ABCB4/NR1H3/GHRL/LRAT                                                                                                                        | 9  |
| BP | GO:0050919 | negative chemotaxis                                                | 6/632  | 36/17293  | 0.00177756 | 0.12723143 | SEMA3D/SEMA3B/NRG1/SLIT3/PLXNA4/EPHA7                                                                                                                               | 6  |
| BP | GO:0001964 | startle response                                                   | 5/632  | 25/17293  | 0.0018562  | 0.12805479 | NRG1/GRID2/UCN/GRIN2D/GRIN3A                                                                                                                                        | 5  |
| BP | GO:0051048 | negative regulation of secretion                                   | 17/632 | 210/17293 | 0.00187143 | 0.12805479 | TRIM9/PTGER3/IL1B/RGCC/INHA/EDN1/TNFRSF9/NRG1/NLRP3/ACVR1C/IL6/PPP1R9A/LIF/NR1H3/SPX/UCN/GHRL                                                                       | 17 |
| BP | GO:0007156 | homophilic cell adhesion via plasma membrane adhesion molecules    | 14/632 | 157/17293 | 0.00188004 | 0.12805479 | AMIGO2/DSC2/DSC3/CELSR1/CADM3/CADM2/SDK1/CDH6/PCDHGA7/PCDHGA3/PCDHGA1/PCDHGA9/PCDHGB1/PCDHB13                                                                       | 14 |
| BP | GO:0050678 | regulation of epithelial cell proliferation                        | 22/632 | 307/17293 | 0.00212597 | 0.14250719 | SERPINF1/RGCC/EREG/SFRP2/APOE/SOX2/FLT4/IL6/OSR2/NOG/BCL11B/NR4A1/SFN/ESRP2/LIMS2/GHRL/TP63/MIR132/SULF1/CPB2/PROX1/EPPK1                                           | 22 |
| BP | GO:0097529 | myeloid leukocyte migration                                        | 15/632 | 177/17293 | 0.00217659 | 0.1436212  | TREM1/TRPV4/IL1A/IL1B/EDN1/NCKAP1L/IL6/CXADR/CXCL6/CXCL8/CXCL1/CXCL3/CXCL5/CCL7/CCL20                                                                               | 15 |
| BP | GO:0035235 | ionotropic glutamate receptor signaling pathway                    | 5/632  | 26/17293  | 0.00222994 | 0.14487759 | GRID2/GRIK5/GRIN2C/GRIN2D/GRIN3A                                                                                                                                    | 5  |
| BP | GO:0032675 | regulation of interleukin-6 production                             | 11/632 | 110/17293 | 0.00229421 | 0.14679437 | TRPV4/IL1A/IL1B/EREG/NCKAP1L/INPP5D/IL6/UCN/TLR1/GHRL/HAVCR2                                                                                                        | 11 |

|    |            |                                                                      |        |           |            |            |                                                                                                                                |    |
|----|------------|----------------------------------------------------------------------|--------|-----------|------------|------------|--------------------------------------------------------------------------------------------------------------------------------|----|
| BP | GO:0050680 | negative regulation of epithelial cell proliferation                 | 12/632 | 127/17293 | 0.00239434 | 0.14996197 | SERPINF1/RGCC/EREG/SFRP2/APOE/SOX2/SFN/LIMS2/GHRL/SULF1/CPB2/EPPK1                                                             | 12 |
| BP | GO:0050663 | cytokine secretion                                                   | 16/632 | 197/17293 | 0.00243104 | 0.14996197 | TREM1/TRPV4/IL1A/IL1B/RGCC/TNFRSF9/CARD11/NLRC4/NLRP3/IL6/CHI3L1/TLR1/GHRL/HAVCR2/S100A13/CD274                                | 16 |
| BP | GO:0046888 | negative regulation of hormone secretion                             | 8/632  | 65/17293  | 0.00245024 | 0.14996197 | IL1B/INHA/EDN1/ACVR1C/IL6/LIF/UCN/GHRL                                                                                         | 8  |
| BP | GO:0010575 | positive regulation of vascular endothelial growth factor production | 5/632  | 27/17293  | 0.0026556  | 0.16020838 | C3/IL1A/IL1B/FLT4/SULF1                                                                                                        | 5  |
| BP | GO:0043616 | keratinocyte proliferation                                           | 6/632  | 39/17293  | 0.00271426 | 0.16144093 | EREG/WNT16/BCL11B/SFN/TP63/EPPK1                                                                                               | 6  |
| BP | GO:0001696 | gastric acid secretion                                               | 4/632  | 17/17293  | 0.00287566 | 0.16635499 | PTGER3/SGK1/UCN/GHRL                                                                                                           | 4  |
| BP | GO:0015732 | prostaglandin transport                                              | 4/632  | 17/17293  | 0.00287566 | 0.16635499 | IL1B/EDN1/SLCO2A1/ABCC2                                                                                                        | 4  |
| BP | GO:0006641 | triglyceride metabolic process                                       | 10/632 | 98/17293  | 0.00308277 | 0.17592641 | C3/AADAC/AGMO/APOE/FABP3/FABP4/NR1H3/CETP/SLC27A5/GPAT2                                                                        | 10 |
| BP | GO:0050920 | regulation of chemotaxis                                             | 15/632 | 184/17293 | 0.00316009 | 0.17793396 | CXCL11/TRPV4/TMEM102/EDN1/NCKAP1L/IL6/CXCL6/CXCL8/CXCL1/CXCL3/CXCL5/PLXNA4/TUBB2B/CCL7/IL12A                                   | 15 |
| BP | GO:2000242 | negative regulation of reproductive process                          | 7/632  | 54/17293  | 0.00335663 | 0.18431727 | FBXO43/SERPINF1/AMH/ACVR1C/LIF/HORMAD1/SULF1                                                                                   | 7  |
| BP | GO:0019932 | second-messenger-mediated signaling                                  | 21/632 | 299/17293 | 0.00336075 | 0.18431727 | DMTN/ADRB2/CXCL11/RGS2/EDN1/PTHLH/RXFP2/NRG1/RAPGEF4/APOE/JPH2/PPP1R9A/CXCL8/GSTM2/GRIN2C/GRIN2D/NFATC1/HAP1/CCL20/CLIC2/ADCY8 | 21 |
| BP | GO:0044058 | regulation of digestive system process                               | 6/632  | 41/17293  | 0.00351724 | 0.19042672 | PTGER3/SGK1/ABCB4/NR1H3/UCN/GHRL                                                                                               | 6  |
| BP | GO:0046685 | response to arsenic-containing substance                             | 5/632  | 29/17293  | 0.00367852 | 0.19663811 | SERPINF1/ATF3/ABCC2/TNFRSF11B/CYP1A1                                                                                           | 5  |
| BP | GO:0007269 | neurotransmitter secretion                                           | 12/632 | 135/17293 | 0.00396101 | 0.20492657 | TRIM9/SNCAIP/SLC18A2/GRIK5/SYN2/STX11/PPP1R9A/SYT17/SYTL3/BAIAP3/RIMS1/RIMS3                                                   | 12 |
| BP | GO:0099643 | signal release from synapse                                          | 12/632 | 135/17293 | 0.00396101 | 0.20492657 | TRIM9/SNCAIP/SLC18A2/GRIK5/SYN2/STX11/PPP1R9A/SYT17/SYTL3/BAIAP3/RIMS1/RIMS3                                                   | 12 |
| BP | GO:0006775 | fat-soluble vitamin metabolic process                                | 6/632  | 42/17293  | 0.00397916 | 0.20492657 | RBP1/IL1B/VKORC1/CYP11A1/CYP1A1/LRAT                                                                                           | 6  |
| BP | GO:0022612 | gland morphogenesis                                                  | 11/632 | 119/17293 | 0.00423062 | 0.21208608 | ESR1/AREG/IL6/NOG/ESRP2/LIMS2/TP63/SULF1/IGFBP5/CPB2/PROX1                                                                     | 11 |
| BP | GO:0032635 | interleukin-6 production                                             | 11/632 | 119/17293 | 0.00423062 | 0.21208608 | TRPV4/IL1A/IL1B/EREG/NCKAP1L/INPP5D/IL6/UCN/TLR1/GHRL/HAVCR2                                                                   | 11 |
| BP | GO:0031644 | regulation of neurological system process                            | 8/632  | 71/17293  | 0.00426884 | 0.21208608 | GPR35/EDN1/ACPP/NRG1/IL6/SPX/GHRL/GRIN2D                                                                                       | 8  |
| BP | GO:0031649 | heat generation                                                      | 4/632  | 19/17293  | 0.00441946 | 0.21646724 | ADRB2/PTGER3/IL1A/IL1B                                                                                                         | 4  |
| BP | GO:1905952 | regulation of lipid localization                                     | 12/632 | 137/17293 | 0.00445954 | 0.21646724 | C3/IL1B/EDN1/ERFE/APOE/ABCB4/IL6/NR1H3/REN/GHRL/CETP/LRAT                                                                      | 12 |
| BP | GO:0046085 | adenosine metabolic process                                          | 3/632  | 10/17293  | 0.00480956 | 0.22567501 | ACPP/ADA2/PTGDR                                                                                                                | 3  |
| BP | GO:0060453 | regulation of gastric acid secretion                                 | 3/632  | 10/17293  | 0.00480956 | 0.22567501 | PTGER3/SGK1/UCN                                                                                                                | 3  |
| BP | GO:0060513 | prostatic bud formation                                              | 3/632  | 10/17293  | 0.00480956 | 0.22567501 | NOG/TP63/SULF1                                                                                                                 | 3  |
| BP | GO:0001763 | morphogenesis of a branching structure                               | 15/632 | 193/17293 | 0.00493425 | 0.22898154 | EDN1/ESR1/CELSR1/SFRP2/AREG/IL6/NOG/ESRP2/SPINT2/SPINT1/TP63/SULF1/EPHA7/HHIP/PROX1                                            | 15 |
| BP | GO:0006687 | glycosphingolipid metabolic process                                  | 8/632  | 73/17293  | 0.00506236 | 0.23237345 | ST8SIA4/ST8SIA1/B3GALT2/B3GALT1/B4GALNT1/ESYT3/SMPD3/ITGB8                                                                     | 8  |
| BP | GO:0006805 | xenobiotic metabolic process                                         | 10/632 | 106/17293 | 0.00541372 | 0.24582945 | AKR7A3/CYP2W1/AADAC/AOC2/FMO2/FMO3/GSTM2/CES1/CYP1A1/SULT1A1                                                                   | 10 |
| BP | GO:0035587 | purinergic receptor signaling pathway                                | 5/632  | 32/17293  | 0.00570126 | 0.25613225 | ACPP/NECAB2/P2RY6/P2RY2/P2RX6                                                                                                  | 5  |
| BP | GO:0007129 | synapsis                                                             | 6/632  | 46/17293  | 0.00628423 | 0.27199685 | SYCE1/SYCP2/HORMAD1/MEIOC/CCNE2/RAD21L1                                                                                        | 6  |
| BP | GO:0031581 | hemidesmosome assembly                                               | 3/632  | 11/17293  | 0.00643505 | 0.27199685 | COL17A1/ITGB4/ITGA6                                                                                                            | 3  |
| BP | GO:0071639 | positive regulation of monocyte chemotactic protein-1 production     | 3/632  | 11/17293  | 0.00643505 | 0.27199685 | TRPV4/IL1A/IL1B                                                                                                                | 3  |

|    |            |                                                                                                                                                  |        |           |            |            |                                                                                                                                                                        |    |
|----|------------|--------------------------------------------------------------------------------------------------------------------------------------------------|--------|-----------|------------|------------|------------------------------------------------------------------------------------------------------------------------------------------------------------------------|----|
| BP | GO:0022617 | extracellular matrix disassembly                                                                                                                 | 9/632  | 92/17293  | 0.00643687 | 0.27199685 | MMP3/MMP8/TMPRSS6/A2M/ELN/MMP10/TLL2/LCP1/MELTF                                                                                                                        | 9  |
| BP | GO:0061138 | morphogenesis of a branching epithelium                                                                                                          | 14/632 | 180/17293 | 0.00644043 | 0.27199685 | EDN1/ESR1/CELSR1/SFRP2/AREG/IL6/NOG/ESRP2/SPINT2/SPINT1/TP63/SULF1/HHIP/PROX1                                                                                          | 14 |
| BP | GO:0002021 | response to dietary excess                                                                                                                       | 4/632  | 21/17293  | 0.00644084 | 0.27199685 | ADRB2/TRPV4/APOE/ACVR1C                                                                                                                                                | 4  |
| BP | GO:0032368 | regulation of lipid transport                                                                                                                    | 10/632 | 109/17293 | 0.0065778  | 0.27503026 | IL1B/EDN1/ERFE/APOE/ABCB4/NR1H3/REN/GHRL/CETP/LRAT                                                                                                                     | 10 |
| BP | GO:0010817 | regulation of hormone levels                                                                                                                     | 29/632 | 485/17293 | 0.00664978 | 0.27531403 | DIO2/GCNT4/EXOC3L1/DHRS2/TRPV4/RBP4/RBP1/IL1B/NHA/EDN1/KCNG2/ESR1/ANO1/RAPGEF4/ABCB4/ABCC2/ACVR1C/IL6/LIF/REN/UCN/CORIN/CYP11A1/GHRL/CYP1A1/SULT1A1/LRAT/SMPD3/ALDH1A1 | 29 |
| BP | GO:0001505 | regulation of neurotransmitter levels                                                                                                            | 14/632 | 181/17293 | 0.00675388 | 0.27690921 | TRIM9/SNCAIP/SLC18A2/GRIK5/SYN2/STX11/PPP1R9A/GABRA2/SYT17/SYTL3/ZNF219/BAIAP3/RIMS1/RIMS3                                                                             | 14 |
| BP | GO:0006937 | regulation of muscle contraction                                                                                                                 | 13/632 | 163/17293 | 0.00691979 | 0.27912282 | ADRB2/DSC2/RGS2/TNNC1/EDN1/KCNE3/SPX/C12orf57/UCN/GHRL/GSTM2/CNN1/CLIC2                                                                                                | 13 |
| BP | GO:0099531 | presynaptic process involved in chemical synaptic transmission                                                                                   | 12/632 | 145/17293 | 0.00697727 | 0.27912282 | TRIM9/SNCAIP/SLC18A2/GRIK5/SYN2/STX11/PPP1R9A/SYT17/SYTL3/BAIAP3/RIMS1/RIMS3                                                                                           | 12 |
| BP | GO:0071466 | cellular response to xenobiotic stimulus                                                                                                         | 10/632 | 110/17293 | 0.00700616 | 0.27912282 | AKR7A3/CYP2W1/AADAC/AOC2/FMO2/FMO3/GSTM2/CES1/CYP1A1/SULT1A1                                                                                                           | 10 |
| BP | GO:0044706 | multi-multicellular organism process                                                                                                             | 16/632 | 220/17293 | 0.00707294 | 0.27914993 | IL1B/HSD11B2/EDN1/PTHLH/ESR1/ABCC2/FOSB/ACVR1C/LIF/UCN/CORIN/GHRL/HAVCR2/CYP1A1/IGFBP5/PSG4                                                                            | 16 |
| BP | GO:0042391 | regulation of membrane potential                                                                                                                 | 25/632 | 403/17293 | 0.00725042 | 0.28238937 | GPR35/CHRNE/ADRB2/DSC2/CHRNA10/TMEM108/EDN1/KCNE3/GRID2/GRIK5/IL6/PPP1R9A/CXADR/SCN1A/SCN3B/SCN3A/P2RX6/GHRL/GRIN2C/GRIN2D/GRIN3A/PIEZO2/CATSPER1/RIMS1/RIMS3          | 25 |
| BP | GO:0050807 | regulation of synapse organization                                                                                                               | 11/632 | 128/17293 | 0.00728876 | 0.28238937 | AMIGO2/FLRT1/ADGRB3/APOE/CAMK1/GRID2/PPP1R9A/GHRL/LRRN3/C1QL3/EPHA7                                                                                                    | 11 |
| BP | GO:0017144 | drug metabolic process                                                                                                                           | 5/632  | 34/17293  | 0.00742055 | 0.28488183 | VKORC1/FMO2/ABCC2/BCHE/CYP1A1                                                                                                                                          | 5  |
| BP | GO:0010954 | positive regulation of protein processing                                                                                                        | 4/632  | 22/17293  | 0.00764831 | 0.29098032 | C3/C6/CLEC3B/MELTF                                                                                                                                                     | 4  |
| BP | GO:0019915 | lipid storage                                                                                                                                    | 7/632  | 63/17293  | 0.00791686 | 0.29570436 | C3/IL1B/APOE/ACVR1C/IL6/NR1H3/B4GALNT1                                                                                                                                 | 7  |
| BP | GO:0019722 | calcium-mediated signaling                                                                                                                       | 13/632 | 166/17293 | 0.00802182 | 0.29570436 | DMTN/EDN1/NRG1/JPH2/PPP1R9A/CXCL8/GSTM2/GRIN2C/GRIN2D/NFATC1/HAP1/CCL20/CLIC2                                                                                          | 13 |
| BP | GO:0002824 | positive regulation of adaptive immune response based on somatic recombination of immune receptors built from immunoglobulin superfamily domains | 8/632  | 79/17293  | 0.00812775 | 0.29570436 | C3/SLC11A1/TNFSF13/IL1B/NLRP3/IL6/TNFRSF13C/IL12A                                                                                                                      | 8  |
| BP | GO:0001660 | fever generation                                                                                                                                 | 3/632  | 12/17293  | 0.00834946 | 0.29570436 | PTGER3/IL1A/IL1B                                                                                                                                                       | 3  |
| BP | GO:0010755 | regulation of plasminogen activation                                                                                                             | 3/632  | 12/17293  | 0.00834946 | 0.29570436 | CLEC3B/MELTF/CPB2                                                                                                                                                      | 3  |
| BP | GO:0045086 | positive regulation of interleukin-2 biosynthetic process                                                                                        | 3/632  | 12/17293  | 0.00834946 | 0.29570436 | IL1A/IL1B/CARD11                                                                                                                                                       | 3  |
| BP | GO:0045779 | negative regulation of bone resorption                                                                                                           | 3/632  | 12/17293  | 0.00834946 | 0.29570436 | INPP5D/IL6/TNFRSF11B                                                                                                                                                   | 3  |
| BP | GO:0045835 | negative regulation of meiotic nuclear division                                                                                                  | 3/632  | 12/17293  | 0.00834946 | 0.29570436 | FBXO43/LIF/HORMAD1                                                                                                                                                     | 3  |
| BP | GO:0006699 | bile acid biosynthetic process                                                                                                                   | 5/632  | 35/17293  | 0.00840268 | 0.29570436 | SLC27A5/ACOX2/CYP27A1/PROX1/AMACR                                                                                                                                      | 5  |
| BP | GO:1903531 | negative regulation of secretion by cell                                                                                                         | 14/632 | 186/17293 | 0.00850848 | 0.29584007 | TRIM9/IL1B/RGCC/INHA/EDN1/TNFRSF9/NLRP3/ACVR1C/IL6/PPP1R9A/LIF/NR1H3/UCN/GHRL                                                                                          | 14 |
| BP | GO:0008361 | regulation of cell size                                                                                                                          | 12/632 | 149/17293 | 0.00859859 | 0.29584007 | XK/TRPV4/L1CAM/EDN1/NRG1/APOE/DCC/KEL/UCN/PLXNA4/EPHA7/DEPTOR                                                                                                          | 12 |
| BP | GO:0015914 | phospholipid transport                                                                                                                           | 7/632  | 64/17293  | 0.0086167  | 0.29584007 | TMEM30B/APOE/MFSD2A/ABCB4/CETP/PITPNM3/ATP10B                                                                                                                          | 7  |

|    |            |                                                                        |        |           |            |            |                                                                                                                               |    |
|----|------------|------------------------------------------------------------------------|--------|-----------|------------|------------|-------------------------------------------------------------------------------------------------------------------------------|----|
| BP | GO:0046942 | carboxylic acid transport                                              | 20/632 | 307/17293 | 0.00930859 | 0.31279301 | SLC10A4/XK/SLC7A2/SLC11A1/TRPC4/IL1B/EDN1/ERFE/PROCA1/APOE/MFSD2A/SLCO2A1/ABCB4/FABP3/SLC1A2/ABCC2/SLC16A11/SPX/SLC27A5/RIMS1 | 20 |
| BP | GO:0017158 | regulation of calcium ion-dependent exocytosis                         | 7/632  | 65/17293  | 0.00936093 | 0.31279301 | TRIM9/RPH3AL/GRIK5/SYT17/SYTL3/RIMS1/RIMS3                                                                                    | 7  |
| BP | GO:0042116 | macrophage activation                                                  | 7/632  | 65/17293  | 0.00936093 | 0.31279301 | SLC7A2/SLC11A1/ADGRF5/NR1H3/TLR1/CD93/HAVCR2                                                                                  | 7  |
| BP | GO:0006656 | phosphatidylcholine biosynthetic process                               | 5/632  | 36/17293  | 0.00947125 | 0.31279301 | MFSD2A/FABP3/PCYT1B/CDS1/CHKB                                                                                                 | 5  |
| BP | GO:0006639 | acylglycerol metabolic process                                         | 10/632 | 115/17293 | 0.00948082 | 0.31279301 | C3/AADAC/AGMO/APOE/FABP3/FABP4/NR1H3/CETP/SLC27A5/GPAT2                                                                       | 10 |
| BP | GO:0050803 | regulation of synapse structure or activity                            | 11/632 | 133/17293 | 0.00961067 | 0.31461909 | AMIGO2/FLRT1/ADGRB3/APOE/CAMK1/GRID2/PPP1R9A/GHRL/LRRN3/C1QL3/EPHA7                                                           | 11 |
| BP | GO:0060326 | cell chemotaxis                                                        | 18/632 | 268/17293 | 0.00985738 | 0.32021307 | TREM1/CXCL11/TRPV4/TMEM102/IL1B/EDN1/NCKAP1L/IL6/CXADR/CXCL6/CXCL8/CXCL1/CXCL3/CXCL5/NR4A1/CCL7/CCL20/IL12A                   | 18 |
| BP | GO:0006638 | neutral lipid metabolic process                                        | 10/632 | 116/17293 | 0.01004712 | 0.32363072 | C3/AADAC/AGMO/APOE/FABP3/FABP4/NR1H3/CETP/SLC27A5/GPAT2                                                                       | 10 |
| BP | GO:0007565 | female pregnancy                                                       | 14/632 | 190/17293 | 0.01015658 | 0.32363072 | IL1B/HSD11B2/PTHLH/ESR1/ABCC2/FOSB/ACVR1C/LIF/UCN/CORIN/GHRL/HAVCR2/IGFBP5/PSG4                                               | 14 |
| BP | GO:0007411 | axon guidance                                                          | 16/632 | 229/17293 | 0.01019249 | 0.32363072 | SEMA3B/L1CAM/SHC3/DCC/KIF5A/NOG/BCL11B/SLIT3/PLXNA4/EFNB3/TUBB3/TUBB2B/PSPN/FOXG1/EPHA7/NFASC                                 | 16 |
| BP | GO:0035588 | G-protein coupled purinergic receptor signaling pathway                | 4/632  | 24/17293  | 0.01048862 | 0.32676089 | ACPP/NECAB2/P2RY6/P2RY2                                                                                                       | 4  |
| BP | GO:1903319 | positive regulation of protein maturation                              | 4/632  | 24/17293  | 0.01048862 | 0.32676089 | C3/C6/CLEC3B/MELTF                                                                                                            | 4  |
| BP | GO:0099133 | ATP hydrolysis coupled anion transmembrane transport                   | 3/632  | 13/17293  | 0.01056313 | 0.32676089 | ABCC2/ABCC6/ABCC9                                                                                                             | 3  |
| BP | GO:0009410 | response to xenobiotic stimulus                                        | 10/632 | 117/17293 | 0.01063882 | 0.32676089 | AKR7A3/CYP2W1/AADAC/AOC2/FMO2/FMO3/GSTM2/CES1/CYP1A1/SULT1A1                                                                  | 10 |
| BP | GO:0002821 | positive regulation of adaptive immune response                        | 8/632  | 83/17293  | 0.01083271 | 0.32676089 | C3/SLC11A1/TNFSF13/IL1B/NLRP3/IL6/TNFRSF13C/IL12A                                                                             | 8  |
| BP | GO:0048477 | oogenesis                                                              | 8/632  | 83/17293  | 0.01083271 | 0.32676089 | PAQR5/EREG/RXFP2/AMH/HORMAD1/PIWIL2/PLD6/MEIOOC                                                                               | 8  |
| BP | GO:0050886 | endocrine process                                                      | 8/632  | 83/17293  | 0.01083271 | 0.32676089 | IL1B/HSD11B2/INHA/EDN1/REN/UCN/CORIN/GHRL                                                                                     | 8  |
| BP | GO:0097485 | neuron projection guidance                                             | 16/632 | 231/17293 | 0.01101504 | 0.32990449 | SEMA3B/L1CAM/SHC3/DCC/KIF5A/NOG/BCL11B/SLIT3/PLXNA4/EFNB3/TUBB3/TUBB2B/PSPN/FOXG1/EPHA7/NFASC                                 | 16 |
| BP | GO:0042102 | positive regulation of T cell proliferation                            | 9/632  | 101/17293 | 0.01161358 | 0.34385457 | IL1B/EBI3/CARD11/NCKAP1L/IL6/HAVCR2/TNFRSF13C/CD274/IL12A                                                                     | 9  |
| BP | GO:0015698 | inorganic anion transport                                              | 13/632 | 174/17293 | 0.01164367 | 0.34385457 | SLC11A1/ROS1/ANO1/SLC22A14/ABCC2/ABCC6/ABCC9/SLC34A3/GABRA2/GABRA5/P2RY6/CLIC6/CLIC2                                          | 13 |
| BP | GO:0032094 | response to food                                                       | 5/632  | 38/17293  | 0.01188139 | 0.34603538 | HSD11B2/SPX/UCN/GHRL/CYP1A1                                                                                                   | 5  |
| BP | GO:0051281 | positive regulation of release of sequestered calcium ion into cytosol | 5/632  | 38/17293  | 0.01188139 | 0.34603538 | CXCL11/CEMIP/JPH2/GSTM2/HAP1                                                                                                  | 5  |
| BP | GO:0015849 | organic acid transport                                                 | 20/632 | 315/17293 | 0.0121077  | 0.34855251 | SLC10A4/XK/SLC7A2/SLC11A1/TRPC4/IL1B/EDN1/ERFE/PROCA1/APOE/MFSD2A/SLCO2A1/ABCB4/FABP3/SLC1A2/ABCC2/SLC16A11/SPX/SLC27A5/RIMS1 | 20 |
| BP | GO:0050974 | detection of mechanical stimulus involved in sensory perception        | 4/632  | 25/17293  | 0.0121329  | 0.34855251 | CHRNA10/ASIC3/SCN1A/PIEZO2                                                                                                    | 4  |
| BP | GO:0048640 | negative regulation of developmental growth                            | 8/632  | 85/17293  | 0.01241092 | 0.35413064 | ADRB2/RBP4/SFRP2/DCC/NOG/TLL2/MIR25/EPHA7                                                                                     | 8  |

|    |            |                                                                             |        |           |            |            |                                                                                                                                                                          |    |
|----|------------|-----------------------------------------------------------------------------|--------|-----------|------------|------------|--------------------------------------------------------------------------------------------------------------------------------------------------------------------------|----|
| BP | GO:0001655 | urogenital system development                                               | 20/632 | 316/17293 | 0.01250028 | 0.35428632 | SERPINF1/GCNT4/RBP4/ESR1/FRAS1/AMH/LIF/OSR2/NOG/REN/COL4A3/TP63/SULF1/ACTA2/EPCAM/HEYL/EPHA7/PROX1/ITGB4/ITGA6                                                           | 20 |
| BP | GO:0099131 | ATP hydrolysis coupled ion transmembrane transport                          | 7/632  | 69/17293  | 0.01281259 | 0.36071699 | ATP6V1C2/ABCC2/ABCC6/ABCC9/ATP6V0C/ATP6AP1L/ATP2C2                                                                                                                       | 7  |
| BP | GO:0035112 | genitalia morphogenesis                                                     | 3/632  | 14/17293  | 0.01308406 | 0.36150142 | RBP4/SYCP2/TP63                                                                                                                                                          | 3  |
| BP | GO:0046851 | negative regulation of bone remodeling                                      | 3/632  | 14/17293  | 0.01308406 | 0.36150142 | INPP5D/IL6/TNFRSF11B                                                                                                                                                     | 3  |
| BP | GO:0017156 | calcium ion regulated exocytosis                                            | 9/632  | 103/17293 | 0.01309726 | 0.36150142 | TRIM9/RPH3AL/RAPGEF4/GRIK5/STX11/SYT17/SYTL3/RIMS1/RIMS3                                                                                                                 | 9  |
| BP | GO:0045577 | regulation of B cell differentiation                                        | 4/632  | 26/17293  | 0.01393343 | 0.37718517 | INHA/CARD11/NCKAP1L/INPP5D                                                                                                                                               | 4  |
| BP | GO:0046688 | response to copper ion                                                      | 4/632  | 26/17293  | 0.01393343 | 0.37718517 | IL1A/SOD3/CYP1A1/S100A13                                                                                                                                                 | 4  |
| BP | GO:0060740 | prostate gland epithelium morphogenesis                                     | 4/632  | 26/17293  | 0.01393343 | 0.37718517 | ESR1/NOG/TP63/SULF1                                                                                                                                                      | 4  |
| BP | GO:0051963 | regulation of synapse assembly                                              | 8/632  | 87/17293  | 0.01415164 | 0.38065205 | AMIGO2/FLRT1/ADGRB3/GRID2/PPP1R9A/GHRL/LRRN3/EPHA7                                                                                                                       | 8  |
| BP | GO:0001706 | endoderm formation                                                          | 6/632  | 55/17293  | 0.01477702 | 0.39495792 | DUSP2/MMP8/POU5F1/SOX2/NOG/MIXL1                                                                                                                                         | 6  |
| BP | GO:0072001 | renal system development                                                    | 18/632 | 280/17293 | 0.01491721 | 0.39619732 | SERPINF1/GCNT4/RBP4/FRAS1/LIF/OSR2/NOG/REN/COL4A3/TP63/SULF1/ACTA2/EPCAM/HEYL/EPHA7/PROX1/ITGB4/ITGA6                                                                    | 18 |
| BP | GO:0051272 | positive regulation of cellular component movement                          | 27/632 | 473/17293 | 0.0151627  | 0.3978734  | DMTN/CXCL11/TRPV4/TMEM102/IL1A/IL1B/EDN1/CEMIP/MADCAM1/NCKAP1L/FLT4/IL6/CXCL6/CXCL8/CXCL1/CXCL3/CXCL5/P2RY6/TUBB2B/FAM89B/CCL7/EPCAM/CCL20/CD274/PROX1/ITGA6/IL12A       | 27 |
| BP | GO:0050808 | synapse organization                                                        | 17/632 | 260/17293 | 0.01519581 | 0.3978734  | AMIGO2/FLRT1/L1CAM/TMEM108/NRG1/ADGRB3/APOE/SDK1/CAMK1/GRID2/PPP1R9A/GHRL/LRRN3/C1QL3/EPHA7/PCDHB13/NFASC                                                                | 17 |
| BP | GO:0050954 | sensory perception of mechanical stimulus                                   | 12/632 | 161/17293 | 0.01526296 | 0.3978734  | TECTA/CHRNA10/ESPN/CEMIP/ASIC3/GABRA5/SCN1A/COL4A3/UCN/PAX3/PJKV/PIEZO2                                                                                                  | 12 |
| BP | GO:0006939 | smooth muscle contraction                                                   | 9/632  | 106/17293 | 0.01558041 | 0.4031326  | ADRB2/PTGER3/RGS2/EDN1/SPX/GHRL/SULF1/CNN1/ACTA2                                                                                                                         | 9  |
| BP | GO:0045745 | positive regulation of G-protein coupled receptor protein signaling pathway | 4/632  | 27/17293  | 0.0158948  | 0.4031326  | C3/ACPP/NECAB2/PDE6G                                                                                                                                                     | 4  |
| BP | GO:0009404 | toxin metabolic process                                                     | 3/632  | 15/17293  | 0.01591808 | 0.4031326  | CYP2W1/FMO2/CYP1A1                                                                                                                                                       | 3  |
| BP | GO:0050755 | chemokine metabolic process                                                 | 3/632  | 15/17293  | 0.01591808 | 0.4031326  | TREM1/IL1B/IL6                                                                                                                                                           | 3  |
| BP | GO:0032755 | positive regulation of interleukin-6 production                             | 7/632  | 72/17293  | 0.01594202 | 0.4031326  | TRPV4/IL1A/IL1B/EREG/IL6/UCN/TLR1                                                                                                                                        | 7  |
| BP | GO:0055081 | anion homeostasis                                                           | 5/632  | 41/17293  | 0.01622707 | 0.40789839 | APOE/FABP3/ABCC2/SLC34A3/CETP                                                                                                                                            | 5  |
| BP | GO:0032846 | positive regulation of homeostatic process                                  | 15/632 | 222/17293 | 0.01665011 | 0.4159871  | CXCL11/PTGER3/TRPV4/IL1B/EDN1/CEMIP/ANO1/JPH2/NCKAP1L/INPP5D/NR1H3/GHRL/GSTM2/HAP1/CLIC2                                                                                 | 15 |
| BP | GO:0015711 | organic anion transport                                                     | 26/632 | 455/17293 | 0.01674587 | 0.4159871  | SLC10A4/XK/SLC7A2/SLC11A1/TRPC4/IL1B/TMEM30B/EDN1/ERFE/PROCA1/APOE/ASIC3/MFSD2A/SLCO2A1/SLC22A14/ABCB4/FABP3/SLC1A2/ABCC2/SLC16A11/SPX/CETP/PITPNM3/SLC27A5/ATP10B/RIMS1 | 26 |
| BP | GO:0051051 | negative regulation of transport                                            | 28/632 | 500/17293 | 0.01707787 | 0.41761703 | DMTN/GPR35/TRIM9/PTGER3/IL1B/REM2/RGCC/INHA/EDN1/KCNE3/TNFRSF9/NRG1/DERL3/NLRP3/ACVR1C/IL6/PPP1R9A/KEL/LIF/NR1H3/SPX/UCN/NECAB2/GHRL/FAM89B/GSTM2/CLIC2/PROM2            | 28 |
| BP | GO:0071347 | cellular response to interleukin-1                                          | 8/632  | 90/17293  | 0.01708663 | 0.41761703 | IL1A/EDN1/ABCC2/IL6/CXCL8/CHI3L1/CCL7/CCL20                                                                                                                              | 8  |
| BP | GO:0006836 | neurotransmitter transport                                                  | 13/632 | 183/17293 | 0.01710816 | 0.41761703 | TRIM9/SNCAIP/SLC18A2/GRIK5/SYN2/STX11/PPP1R9A/GABRA2/SYT17/SYTL3/BAIAP3/RIMS1/RIMS3                                                                                      | 13 |

|    |            |                                                                                   |        |           |            |            |                                                                                                                                                                         |    |
|----|------------|-----------------------------------------------------------------------------------|--------|-----------|------------|------------|-------------------------------------------------------------------------------------------------------------------------------------------------------------------------|----|
| BP | GO:0044070 | regulation of anion transport                                                     | 9/632  | 108/17293 | 0.01741753 | 0.42272538 | IL1B/EDN1/ROS1/LRRC8E/ERFE/ANO1/APOE/ABCB4/GP<br>R89B                                                                                                                   | 9  |
| BP | GO:0010259 | multicellular organism aging                                                      | 4/632  | 28/17293  | 0.01802107 | 0.42996039 | EDN1/SLC1A2/INPP5D/TP63                                                                                                                                                 | 4  |
| BP | GO:0042036 | negative regulation of cytokine<br>biosynthetic process                           | 4/632  | 28/17293  | 0.01802107 | 0.42996039 | INHA/INPP5D/IL6/GHRL                                                                                                                                                    | 4  |
| BP | GO:0060512 | prostate gland morphogenesis                                                      | 4/632  | 28/17293  | 0.01802107 | 0.42996039 | ESR1/NOG/TP63/SULF1                                                                                                                                                     | 4  |
| BP | GO:2000147 | positive regulation of cell motility                                              | 26/632 | 460/17293 | 0.01894533 | 0.44132994 | DMTN/CXCL11/TRPV4/TMEM102/IL1A/IL1B/EDN1/CEMI<br>P/MADCAM1/NCKAP1L/FLT4/IL6/CXCL6/CXCL8/CXCL1/<br>CXCL3/CXCL5/P2RY6/FAM89B/CCL7/EPCAM/CCL20/CD2<br>74/PROX1/ITGA6/IL12A | 26 |
| BP | GO:0045072 | regulation of interferon-gamma<br>biosynthetic process                            | 3/632  | 16/17293  | 0.01906906 | 0.44132994 | INHA/EBI3/TNFRSF13C                                                                                                                                                     | 3  |
| BP | GO:0051384 | response to glucocorticoid                                                        | 11/632 | 147/17293 | 0.01916874 | 0.44132994 | SERPINF1/HSD11B2/EDN1/AREG/ABCB4/ABCC2/BCHE/F<br>OSB/IL6/SLIT3/UCN                                                                                                      | 11 |
| BP | GO:0030816 | positive regulation of cAMP metabolic<br>process                                  | 8/632  | 92/17293  | 0.0192717  | 0.44132994 | MC1R/ADRB2/CXCL11/RAMP1/PTHLH/RXFP2/UCN/ADC<br>Y8                                                                                                                       | 8  |
| BP | GO:0032649 | regulation of interferon-gamma<br>production                                      | 8/632  | 92/17293  | 0.0192717  | 0.44132994 | SLC11A1/IL1B/INHA/EBI3/HAVCR2/TNFRSF13C/CD274/I<br>L12A                                                                                                                 | 8  |
| BP | GO:0006936 | muscle contraction                                                                | 21/632 | 352/17293 | 0.01946594 | 0.44132994 | CHRNE/ADRB2/DSC2/PTGER3/RGS2/TNNC1/EDN1/KCN<br>E3/LMOD1/SCN1A/SCN3B/SPX/C12orf57/UCN/P2RX6/G<br>HRL/SULF1/GSTM2/CNN1/ACTA2/CLIC2                                        | 21 |
| BP | GO:0090662 | ATP hydrolysis coupled transmembrane<br>transport                                 | 7/632  | 75/17293  | 0.01957818 | 0.44132994 | ATP6V1C2/ABCC2/ABCC6/ABCC9/ATP6V0C/ATP6AP1L/<br>ATP2C2                                                                                                                  | 7  |
| BP | GO:0021983 | pituitary gland development                                                       | 5/632  | 43/17293  | 0.01964506 | 0.44132994 | SOX2/TBX19/NOG/HESX1/PITX1                                                                                                                                              | 5  |
| BP | GO:0031638 | zymogen activation                                                                | 5/632  | 43/17293  | 0.01964506 | 0.44132994 | CUZD1/CLEC3B/C1R/MELTF/CPB2                                                                                                                                             | 5  |
| BP | GO:0045744 | negative regulation of G-protein<br>coupled receptor protein signaling<br>pathway | 5/632  | 43/17293  | 0.01964506 | 0.44132994 | ADRB2/RGS2/RPH3AL/CXCL8/NECAB2                                                                                                                                          | 5  |
| BP | GO:0048638 | regulation of developmental growth                                                | 19/632 | 310/17293 | 0.01984406 | 0.44132994 | ADRB2/L1CAM/RBP4/EDN1/SFRP2/NRG1/APOE/DCC/IL7<br>/NOG/SYT17/PLXNA4/TLL2/GHRL/MIR25/EPHA7/PROX1<br>/RIMS1/EPPK1                                                          | 19 |
| BP | GO:0060560 | developmental growth involved in<br>morphogenesis                                 | 14/632 | 207/17293 | 0.02011182 | 0.44132994 | FLRT1/L1CAM/TMEM108/ESR1/SFRP2/NRG1/APOE/ARE<br>G/DCC/SLIT3/SYT17/PLXNA4/EPHA7/RIMS1                                                                                    | 14 |
| BP | GO:0010951 | negative regulation of endopeptidase<br>activity                                  | 16/632 | 248/17293 | 0.02030144 | 0.44132994 | C3/SERPINE3/SERPINF1/PAPLN/SERPINB12/BIRC3/SFRP2<br>/NLRC4/A2M/IL6/WFIKKN1/COL4A3/SFN/SPINT2/SPINT<br>1/HMSD                                                            | 16 |
| BP | GO:0002675 | positive regulation of acute<br>inflammatory response                             | 4/632  | 29/17293  | 0.02031588 | 0.44132994 | C3/PTGER3/IL1B/IL6                                                                                                                                                      | 4  |
| BP | GO:0010837 | regulation of keratinocyte proliferation                                          | 4/632  | 29/17293  | 0.02031588 | 0.44132994 | BCL11B/SFN/TP63/EPPK1                                                                                                                                                   | 4  |
| BP | GO:0048791 | calcium ion-regulated exocytosis of<br>neurotransmitter                           | 4/632  | 29/17293  | 0.02031588 | 0.44132994 | SYT17/SYTL3/RIMS1/RIMS3                                                                                                                                                 | 4  |
| BP | GO:0052548 | regulation of endopeptidase activity                                              | 23/632 | 397/17293 | 0.02037603 | 0.44132994 | C3/SERPINE3/SERPINF1/PAPLN/TNFSF10/SERPINB12/BIR<br>C3/SFRP2/SOX2/NLRC4/NLRP3/A2M/ACVR1C/IL6/WFIKK<br>N1/COL4A3/SFN/SPINT2/SPINT1/TP63/IFI27/EPHA7/HM<br>SD             | 23 |
| BP | GO:0030335 | positive regulation of cell migration                                             | 25/632 | 442/17293 | 0.02093992 | 0.44132994 | DMTN/CXCL11/TRPV4/TMEM102/IL1A/IL1B/EDN1/CEMI<br>P/MADCAM1/NCKAP1L/FLT4/IL6/CXCL6/CXCL8/CXCL1/<br>CXCL3/CXCL5/P2RY6/FAM89B/CCL7/CCL20/CD274/PRO<br>X1/ITGA6/IL12A       | 25 |
| BP | GO:0044060 | regulation of endocrine process                                                   | 5/632  | 44/17293  | 0.02151807 | 0.44132994 | IL1B/INHA/REN/UCN/GHRL                                                                                                                                                  | 5  |
| BP | GO:0051445 | regulation of meiotic cell cycle                                                  | 5/632  | 44/17293  | 0.02151807 | 0.44132994 | FBXO43/LIF/HORMAD1/PIWIL2/MEIOC                                                                                                                                         | 5  |
| BP | GO:1903793 | positive regulation of anion transport                                            | 5/632  | 44/17293  | 0.02151807 | 0.44132994 | IL1B/EDN1/ERFE/APOE/ABCB4                                                                                                                                               | 5  |



|    |            |                                                                       |        |           |            |            |                                                                                                                                                                   |    |
|----|------------|-----------------------------------------------------------------------|--------|-----------|------------|------------|-------------------------------------------------------------------------------------------------------------------------------------------------------------------|----|
| BP | GO:0030801 | positive regulation of cyclic nucleotide metabolic process            | 9/632  | 112/17293 | 0.02155765 | 0.44132994 | MC1R/ADRB2/CXCL11/RAMP1/PTHLH/RXFP2/APOE/UCN/ADCY8                                                                                                                | 9  |
| BP | GO:0019233 | sensory perception of pain                                            | 8/632  | 94/17293  | 0.02164911 | 0.44132994 | EDN1/ACPP/ANO1/ASIC3/SCN1A/SCN3B/SPX/GRIN2D                                                                                                                       | 8  |
| BP | GO:0007416 | synapse assembly                                                      | 11/632 | 150/17293 | 0.02190813 | 0.44132994 | AMIGO2/FLRT1/NGR1/ADGRB3/SDK1/GRID2/PPP1R9A/GHRL/LRRN3/EPHA7/PCDHB13                                                                                              | 11 |
| BP | GO:0045143 | homologous chromosome segregation                                     | 6/632  | 60/17293  | 0.02192738 | 0.44132994 | SYCE1/SYCP2/HORMAD1/MEIOC/CCNE2/RAD21L1                                                                                                                           | 6  |
| BP | GO:0016079 | synaptic vesicle exocytosis                                           | 7/632  | 77/17293  | 0.02230183 | 0.44132994 | TRIM9/GRIK5/STX11/SYT17/SYTL3/RIMS1/RIMS3                                                                                                                         | 7  |
| BP | GO:0060047 | heart contraction                                                     | 17/632 | 272/17293 | 0.02252753 | 0.44132994 | DSC2/RGS2/TNNC1/EDN1/KCND1/KCNG2/KCNE3/ABCC9/CXADR/SCN1A/SCN3B/SPX/UCN/CORIN/GSTM2/HSPB7/CLIC2                                                                    | 17 |
| BP | GO:0001573 | ganglioside metabolic process                                         | 3/632  | 17/17293  | 0.02253907 | 0.44132994 | ST8SIA4/B4GALNT1/ITGB8                                                                                                                                            | 3  |
| BP | GO:0042095 | interferon-gamma biosynthetic process                                 | 3/632  | 17/17293  | 0.02253907 | 0.44132994 | INHA/EBI3/TNFRSF13C                                                                                                                                               | 3  |
| BP | GO:0043092 | L-amino acid import                                                   | 3/632  | 17/17293  | 0.02253907 | 0.44132994 | SLC7A2/SLC11A1/SLC1A2                                                                                                                                             | 3  |
| BP | GO:0051447 | negative regulation of meiotic cell cycle                             | 3/632  | 17/17293  | 0.02253907 | 0.44132994 | FBXO43/LIF/HORMAD1                                                                                                                                                | 3  |
| BP | GO:0060457 | negative regulation of digestive system process                       | 3/632  | 17/17293  | 0.02253907 | 0.44132994 | PTGER3/NR1H3/UCN                                                                                                                                                  | 3  |
| BP | GO:0060572 | morphogenesis of an epithelial bud                                    | 3/632  | 17/17293  | 0.02253907 | 0.44132994 | NOG/TP63/SULF1                                                                                                                                                    | 3  |
| BP | GO:0071605 | monocyte chemotactic protein-1 production                             | 3/632  | 17/17293  | 0.02253907 | 0.44132994 | TRPV4/IL1A/IL1B                                                                                                                                                   | 3  |
| BP | GO:0071637 | regulation of monocyte chemotactic protein-1 production               | 3/632  | 17/17293  | 0.02253907 | 0.44132994 | TRPV4/IL1A/IL1B                                                                                                                                                   | 3  |
| BP | GO:0072574 | hepatocyte proliferation                                              | 3/632  | 17/17293  | 0.02253907 | 0.44132994 | LIMS2/CPB2/PROX1                                                                                                                                                  | 3  |
| BP | GO:0072575 | epithelial cell proliferation involved in liver morphogenesis         | 3/632  | 17/17293  | 0.02253907 | 0.44132994 | LIMS2/CPB2/PROX1                                                                                                                                                  | 3  |
| BP | GO:2000193 | positive regulation of fatty acid transport                           | 3/632  | 17/17293  | 0.02253907 | 0.44132994 | IL1B/EDN1/ERFE                                                                                                                                                    | 3  |
| BP | GO:0045667 | regulation of osteoblast differentiation                              | 9/632  | 113/17293 | 0.02269442 | 0.44132994 | IFITM1/TMEM119/RORB/SFRP2/AREG/IL6/NOG/TP63/IGFBP5                                                                                                                | 9  |
| BP | GO:0040017 | positive regulation of locomotion                                     | 27/632 | 490/17293 | 0.02274462 | 0.44132994 | DMTN/CXCL11/TRPV4/TMEM102/IL1A/IL1B/EDN1/CEMP/MADCAM1/NCKAP1L/FLT4/IL6/CXCL6/CXCL8/CXCL1/CXCL3/CXCL5/P2RY6/TUBB2B/FAM89B/CCL7/EPCAM/CCL20/CD274/PROX1/ITGA6/IL12A | 27 |
| BP | GO:0040020 | regulation of meiotic nuclear division                                | 4/632  | 30/17293  | 0.02278236 | 0.44132994 | FBXO43/LIF/HORMAD1/PIWIL2                                                                                                                                         | 4  |
| BP | GO:0050900 | leukocyte migration                                                   | 26/632 | 468/17293 | 0.02293155 | 0.44219154 | TREM1/CXCL11/TRPV4/GCSAM/L1CAM/TMEM102/IL1A/IL1B/EDN1/GRB14/MADCAM1/NCKAP1L/INPP5D/IL6/CXADR/SPNS2/CXCL6/CXCL8/CXCL1/CXCL3/CXCL5/CCL7/EPCAM/CCL20/ITGA6/IL12A     | 26 |
| BP | GO:0017157 | regulation of exocytosis                                              | 12/632 | 171/17293 | 0.02332832 | 0.44768776 | TRIM9/RSG1/LLGL2/RPH3AL/RAPGEF4/GRIK5/SYT17/SYTL3/HAP1/SMPD3/RIMS1/RIMS3                                                                                          | 12 |
| BP | GO:0042445 | hormone metabolic process                                             | 13/632 | 191/17293 | 0.0234286  | 0.44768776 | DIO2/GCNT4/DHRS2/RBP4/RBP1/ESR1/REN/CORIN/CYP11A1/CYP1A1/SULT1A1/LRAT/ALDH1A1                                                                                     | 13 |
| BP | GO:0051785 | positive regulation of nuclear division                               | 6/632  | 61/17293  | 0.02359465 | 0.44882982 | IL1A/IL1B/RGCC/EDN1/EREG/PIWIL2                                                                                                                                   | 6  |
| BP | GO:0007215 | glutamate receptor signaling pathway                                  | 7/632  | 78/17293  | 0.02375733 | 0.44989776 | ADRB2/GRID2/GRIK5/NECAB2/GRIN2C/GRIN2D/GRIN3A                                                                                                                     | 7  |
| BP | GO:0034754 | cellular hormone metabolic process                                    | 9/632  | 115/17293 | 0.02509545 | 0.46479501 | DHRS2/RBP4/RBP1/ESR1/CYP11A1/CYP1A1/SULT1A1/LRAT/ALDH1A1                                                                                                          | 9  |
| BP | GO:1901021 | positive regulation of calcium ion transmembrane transporter activity | 4/632  | 31/17293  | 0.02542321 | 0.46479501 | KCNE3/JPH2/GSTM2/HAP1                                                                                                                                             | 4  |

|    |            |                                                            |        |           |            |            |                                                                                                                                                  |    |
|----|------------|------------------------------------------------------------|--------|-----------|------------|------------|--------------------------------------------------------------------------------------------------------------------------------------------------|----|
| BP | GO:0003015 | heart process                                              | 17/632 | 276/17293 | 0.02548938 | 0.46479501 | DSC2/RGS2/TNNC1/EDN1/KCND1/KCNG2/KCNE3/ABCC9/CXADR/SCN1A/SCN3B/SPX/UCN/CORIN/GSTM2/HSPB7/CLIC2                                                   | 17 |
| BP | GO:0050905 | neuromuscular process                                      | 8/632  | 97/17293  | 0.02559297 | 0.46479501 | NRG1/GRID2/SCN1A/UCN/GRIN2C/GRIN2D/GRIN3A/PRRT2                                                                                                  | 8  |
| BP | GO:0008206 | bile acid metabolic process                                | 5/632  | 46/17293  | 0.02560341 | 0.46479501 | SLC27A5/ACOX2/CYP27A1/PROX1/AMACR                                                                                                                | 5  |
| BP | GO:0071548 | response to dexamethasone                                  | 5/632  | 46/17293  | 0.02560341 | 0.46479501 | SERPINF1/EDN1/ABCB4/ABCC2/IL6                                                                                                                    | 5  |
| BP | GO:0048608 | reproductive structure development                         | 24/632 | 429/17293 | 0.0261353  | 0.46479501 | SERPINF1/TNFSF10/RBP4/INHA/EREG/RXFP2/ESR1/SFRP2/ABCB4/AMH/PCYT1B/ANKRD7/SYCP2/LIF/NOG/REN/S<br>LIT3/GHRL/SPINT2/SPINT1/TP63/SULF1/RAD21L1/ITGB8 | 24 |
| BP | GO:0021533 | cell differentiation in hindbrain                          | 3/632  | 18/17293  | 0.02632857 | 0.46479501 | GRID2/NOG/PROX1                                                                                                                                  | 3  |
| BP | GO:0030540 | female genitalia development                               | 3/632  | 18/17293  | 0.02632857 | 0.46479501 | RBP4/ESR1/TP63                                                                                                                                   | 3  |
| BP | GO:0032095 | regulation of response to food                             | 3/632  | 18/17293  | 0.02632857 | 0.46479501 | SPX/UCN/GHRL                                                                                                                                     | 3  |
| BP | GO:0034587 | piRNA metabolic process                                    | 3/632  | 18/17293  | 0.02632857 | 0.46479501 | PIWIL2/PLD6/GPAT2                                                                                                                                | 3  |
| BP | GO:0045076 | regulation of interleukin-2 biosynthetic process           | 3/632  | 18/17293  | 0.02632857 | 0.46479501 | IL1A/IL1B/CARD11                                                                                                                                 | 3  |
| BP | GO:0051969 | regulation of transmission of nerve impulse                | 3/632  | 18/17293  | 0.02632857 | 0.46479501 | GPR35/IL6/GHRL                                                                                                                                   | 3  |
| BP | GO:0070633 | transepithelial transport                                  | 3/632  | 18/17293  | 0.02632857 | 0.46479501 | EDN1/CXADR/P2RY6                                                                                                                                 | 3  |
| BP | GO:0072576 | liver morphogenesis                                        | 3/632  | 18/17293  | 0.02632857 | 0.46479501 | LIMS2/CPB2/PROX1                                                                                                                                 | 3  |
| BP | GO:1903055 | positive regulation of extracellular matrix organization   | 3/632  | 18/17293  | 0.02632857 | 0.46479501 | RGCC/MELTF/CPB2                                                                                                                                  | 3  |
| BP | GO:0002819 | regulation of adaptive immune response                     | 10/632 | 135/17293 | 0.02641506 | 0.46479501 | C3/SLC11A1/TNFSF13/IL1B/SAMSN1/NLRP3/IL6/HAVCR2/TNFRSF13C/IL12A                                                                                  | 10 |
| BP | GO:0022409 | positive regulation of cell-cell adhesion                  | 16/632 | 257/17293 | 0.02717307 | 0.46952823 | DMTN/VNN1/IL1B/EBI3/CARD11/SOX2/NCKAP1L/NLRP3/IL6/IL7/EFNB3/HAVCR2/TNFRSF13C/CD274/ITGA6/IL12A                                                   | 16 |
| BP | GO:0032729 | positive regulation of interferon-gamma production         | 6/632  | 63/17293  | 0.02717933 | 0.46952823 | SLC11A1/IL1B/EBI3/HAVCR2/TNFRSF13C/IL12A                                                                                                         | 6  |
| BP | GO:1904427 | positive regulation of calcium ion transmembrane transport | 6/632  | 63/17293  | 0.02717933 | 0.46952823 | CXCL11/KCNE3/CEMIP/JPH2/GSTM2/HAP1                                                                                                               | 6  |
| BP | GO:0050671 | positive regulation of lymphocyte proliferation            | 10/632 | 136/17293 | 0.02761826 | 0.46952823 | IL1B/EBI3/CARD11/NCKAP1L/IL6/IL7/HAVCR2/TNFRSF13C/CD274/IL12A                                                                                    | 10 |
| BP | GO:0046660 | female sex differentiation                                 | 9/632  | 117/17293 | 0.0276714  | 0.46952823 | RBP4/INHA/EREG/ESR1/DACH1/AMH/PCYT1B/SLIT3/TP63                                                                                                  | 9  |
| BP | GO:0060042 | retina morphogenesis in camera-type eye                    | 5/632  | 47/17293  | 0.0278197  | 0.46952823 | RBP4/ROM1/RORB/SDK1/PROX1                                                                                                                        | 5  |
| BP | GO:0071715 | icosanoid transport                                        | 5/632  | 47/17293  | 0.0278197  | 0.46952823 | IL1B/EDN1/PROCA1/SLCO2A1/ABCC2                                                                                                                   | 5  |
| BP | GO:1901571 | fatty acid derivative transport                            | 5/632  | 47/17293  | 0.0278197  | 0.46952823 | IL1B/EDN1/PROCA1/SLCO2A1/ABCC2                                                                                                                   | 5  |
| BP | GO:0090257 | regulation of muscle system process                        | 15/632 | 237/17293 | 0.02798901 | 0.46952823 | ADRB2/DSC2/RGS2/TNNC1/EDN1/KCNE3/SPX/C12orf57/UCN/GHRL/MIR25/GSTM2/IGFBP5/CNN1/CLIC2                                                             | 15 |
| BP | GO:0061458 | reproductive system development                            | 24/632 | 432/17293 | 0.02806307 | 0.46952823 | SERPINF1/TNFSF10/RBP4/INHA/EREG/RXFP2/ESR1/SFRP2/ABCB4/AMH/PCYT1B/ANKRD7/SYCP2/LIF/NOG/REN/S<br>LIT3/GHRL/SPINT2/SPINT1/TP63/SULF1/RAD21L1/ITGB8 | 24 |
| BP | GO:0002711 | positive regulation of T cell mediated immunity            | 4/632  | 32/17293  | 0.02824063 | 0.46952823 | IL1B/NLRP3/IL6/IL12A                                                                                                                             | 4  |
| BP | GO:0051930 | regulation of sensory perception of pain                   | 4/632  | 32/17293  | 0.02824063 | 0.46952823 | EDN1/ACPP/SPX/GRIN2D                                                                                                                             | 4  |
| BP | GO:0051931 | regulation of sensory perception                           | 4/632  | 32/17293  | 0.02824063 | 0.46952823 | EDN1/ACPP/SPX/GRIN2D                                                                                                                             | 4  |
| BP | GO:0060317 | cardiac epithelial to mesenchymal transition               | 4/632  | 32/17293  | 0.02824063 | 0.46952823 | WNT16/ERG/NOG/HEYL                                                                                                                               | 4  |

|    |            |                                                                              |        |           |            |            |                                                                                                       |    |
|----|------------|------------------------------------------------------------------------------|--------|-----------|------------|------------|-------------------------------------------------------------------------------------------------------|----|
| BP | GO:0032946 | positive regulation of mononuclear cell proliferation                        | 10/632 | 137/17293 | 0.02886001 | 0.47604985 | IL1B/EBI3/CARD11/NCKAP1L/IL6/IL7/HAVCR2/TNFRSF13C/CD274/IL12A                                         | 10 |
| BP | GO:0099504 | synaptic vesicle cycle                                                       | 9/632  | 118/17293 | 0.02902675 | 0.47604985 | TRIM9/SLC18A2/GRIK5/STX11/SYP/SYT17/SYTL3/RIMS1/RIMS3                                                 | 9  |
| BP | GO:0006940 | regulation of smooth muscle contraction                                      | 6/632  | 64/17293  | 0.02909961 | 0.47604985 | ADRB2/RGS2/EDN1/SPX/GHRL/CNN1                                                                         | 6  |
| BP | GO:0046889 | positive regulation of lipid biosynthetic process                            | 6/632  | 64/17293  | 0.02909961 | 0.47604985 | IL1B/ADGRF5/APOE/FABP3/NR1H3/SMPD3                                                                    | 6  |
| BP | GO:2000241 | regulation of reproductive process                                           | 10/632 | 138/17293 | 0.03014089 | 0.47604985 | FBXO43/SERPINF1/ESR1/AMH/ACVR1C/LIF/HORMAD1/SULF1/PIWIL2/MEIOC                                        | 10 |
| BP | GO:0003044 | regulation of systemic arterial blood pressure mediated by a chemical signal | 5/632  | 48/17293  | 0.03015408 | 0.47604985 | ADRB2/HSD11B2/EDN1/REN/CORIN                                                                          | 5  |
| BP | GO:0030850 | prostate gland development                                                   | 5/632  | 48/17293  | 0.03015408 | 0.47604985 | SERPINF1/ESR1/NOG/TP63/SULF1                                                                          | 5  |
| BP | GO:0060986 | endocrine hormone secretion                                                  | 5/632  | 48/17293  | 0.03015408 | 0.47604985 | IL1B/INHA/REN/UCN/GHRL                                                                                | 5  |
| BP | GO:2000273 | positive regulation of receptor activity                                     | 5/632  | 48/17293  | 0.03015408 | 0.47604985 | ADRB2/EREG/JPH2/GSTM2/HAP1                                                                            | 5  |
| BP | GO:0032612 | interleukin-1 production                                                     | 7/632  | 82/17293  | 0.03023097 | 0.47604985 | IL1B/NLRC4/NLRP3/GHRL/HAVCR2/S100A13/CCL20                                                            | 7  |
| BP | GO:0006491 | N-glycan processing                                                          | 3/632  | 19/17293  | 0.03043653 | 0.47604985 | ST8SIA4/MGAT4A/MAN1C1                                                                                 | 3  |
| BP | GO:0034104 | negative regulation of tissue remodeling                                     | 3/632  | 19/17293  | 0.03043653 | 0.47604985 | INPP5D/IL6/TNFRSF11B                                                                                  | 3  |
| BP | GO:0035743 | CD4-positive, alpha-beta T cell cytokine production                          | 3/632  | 19/17293  | 0.03043653 | 0.47604985 | NLRP3/IL6/IL12A                                                                                       | 3  |
| BP | GO:0042474 | middle ear morphogenesis                                                     | 3/632  | 19/17293  | 0.03043653 | 0.47604985 | EDN1/OSR2/NOG                                                                                         | 3  |
| BP | GO:0043090 | amino acid import                                                            | 3/632  | 19/17293  | 0.03043653 | 0.47604985 | SLC7A2/SLC11A1/SLC1A2                                                                                 | 3  |
| BP | GO:0045649 | regulation of macrophage differentiation                                     | 3/632  | 19/17293  | 0.03043653 | 0.47604985 | TRIB1/INHA/LIF                                                                                        | 3  |
| BP | GO:0010466 | negative regulation of peptidase activity                                    | 16/632 | 261/17293 | 0.03073044 | 0.47887329 | C3/SERPINE3/SERPINF1/PAPLN/SERPINB12/BIRC3/SFRP2/NLRC4/A2M/IL6/WFIKKN1/COL4A3/SFN/SPINT2/SPINT1/HMSD  | 16 |
| BP | GO:0015721 | bile acid and bile salt transport                                            | 4/632  | 33/17293  | 0.0312364  | 0.48319158 | SLC10A4/ABCB4/ABCC2/SLC27A5                                                                           | 4  |
| BP | GO:0019433 | triglyceride catabolic process                                               | 4/632  | 33/17293  | 0.0312364  | 0.48319158 | AADAC/APOE/FABP3/FABP4                                                                                | 4  |
| BP | GO:0030804 | positive regulation of cyclic nucleotide biosynthetic process                | 8/632  | 101/17293 | 0.03159481 | 0.48695209 | MC1R/ADRB2/RAMP1/PTHLH/RXFP2/APOE/UCN/ADCY8                                                           | 8  |
| BP | GO:0030819 | positive regulation of cAMP biosynthetic process                             | 7/632  | 83/17293  | 0.03201765 | 0.49167464 | MC1R/ADRB2/RAMP1/PTHLH/RXFP2/UCN/ADCY8                                                                | 7  |
| BP | GO:0035637 | multicellular organismal signaling                                           | 13/632 | 200/17293 | 0.03244465 | 0.4953381  | GPR35/DSC2/KCND1/KCNE3/ABCC9/IL6/CXADR/SCN1A/SCN3B/SCN3A/CORIN/GHRL/NFASC                             | 13 |
| BP | GO:0007157 | heterophilic cell-cell adhesion via plasma membrane cell adhesion molecules  | 5/632  | 49/17293  | 0.0326081  | 0.4953381  | AMIGO2/CADM3/CADM2/GRID2/CXADR                                                                        | 5  |
| BP | GO:0045933 | positive regulation of muscle contraction                                    | 5/632  | 49/17293  | 0.0326081  | 0.4953381  | RGS2/EDN1/SPX/UCN/GHRL                                                                                | 5  |
| BP | GO:0008016 | regulation of heart contraction                                              | 15/632 | 242/17293 | 0.03281251 | 0.49665677 | DSC2/RGS2/EDN1/KCND1/KCNG2/KCNE3/ABCC9/CXADR/SCN3B/SPX/UCN/CORIN/GSTM2/HSPB7/CLIC2                    | 15 |
| BP | GO:0051965 | positive regulation of synapse assembly                                      | 6/632  | 66/17293  | 0.03320251 | 0.49767928 | AMIGO2/FLRT1/ADGRB3/GRID2/GHRL/LRRN3                                                                  | 6  |
| BP | GO:0007204 | positive regulation of cytosolic calcium ion concentration                   | 17/632 | 285/17293 | 0.03321493 | 0.49767928 | GPR35/CXCL11/CHRNA10/TRPV4/LPAR2/EDN1/RXFP3/ESR1/CEMIP/JPH2/GHRL/GSTM2/GRIN2C/GRIN2D/HAP1/CLIC2/CCR10 | 17 |
| BP | GO:0032609 | interferon-gamma production                                                  | 8/632  | 102/17293 | 0.03323362 | 0.49767928 | SLC11A1/IL1B/INHA/EBI3/HAVCR2/TNFRSF13C/CD274/IL12A                                                   | 8  |
| BP | GO:0051216 | cartilage development                                                        | 12/632 | 181/17293 | 0.03416638 | 0.50365477 | TRPV4/EDN1/PTHLH/SFRP2/SOX5/OSR2/NOG/CHI3L1/GHRL/SULF1/PITX1/ITGB8                                    | 12 |
| BP | GO:0019432 | triglyceride biosynthetic process                                            | 4/632  | 34/17293  | 0.03441184 | 0.50365477 | C3/AGMO/NR1H3/GPAT2                                                                                   | 4  |

|    |            |                                                                                                                                         |        |           |            |            |                                                                                                                                                                |    |
|----|------------|-----------------------------------------------------------------------------------------------------------------------------------------|--------|-----------|------------|------------|----------------------------------------------------------------------------------------------------------------------------------------------------------------|----|
| BP | GO:1901985 | positive regulation of protein acetylation                                                                                              | 4/632  | 34/17293  | 0.03441184 | 0.50365477 | IL1B/CAMK1/LIF/PIWIL2                                                                                                                                          | 4  |
| BP | GO:0032373 | positive regulation of sterol transport                                                                                                 | 3/632  | 20/17293  | 0.03486059 | 0.50365477 | APOE/ABCB4/NR1H3                                                                                                                                               | 3  |
| BP | GO:0032376 | positive regulation of cholesterol transport                                                                                            | 3/632  | 20/17293  | 0.03486059 | 0.50365477 | APOE/ABCB4/NR1H3                                                                                                                                               | 3  |
| BP | GO:0042359 | vitamin D metabolic process                                                                                                             | 3/632  | 20/17293  | 0.03486059 | 0.50365477 | IL1B/CYP11A1/CYP1A1                                                                                                                                            | 3  |
| BP | GO:0046827 | positive regulation of protein export from nucleus                                                                                      | 3/632  | 20/17293  | 0.03486059 | 0.50365477 | IL1B/CAMK1/SFN                                                                                                                                                 | 3  |
| BP | GO:2000178 | negative regulation of neural precursor cell proliferation                                                                              | 3/632  | 20/17293  | 0.03486059 | 0.50365477 | LIMS2/SPINT2/SPINT1                                                                                                                                            | 3  |
| BP | GO:2000380 | regulation of mesoderm development                                                                                                      | 3/632  | 20/17293  | 0.03486059 | 0.50365477 | SFRP2/TP63/MIXL1                                                                                                                                               | 3  |
| BP | GO:0034113 | heterotypic cell-cell adhesion                                                                                                          | 5/632  | 50/17293  | 0.03518308 | 0.50365477 | DSC2/IL1B/MADCAM1/CXADR/NFASC                                                                                                                                  | 5  |
| BP | GO:0045840 | positive regulation of mitotic nuclear division                                                                                         | 5/632  | 50/17293  | 0.03518308 | 0.50365477 | IL1A/IL1B/RGCC/EDN1/EREG                                                                                                                                       | 5  |
| BP | GO:0051452 | intracellular pH reduction                                                                                                              | 5/632  | 50/17293  | 0.03518308 | 0.50365477 | ATP6V1C2/RAB38/SLC11A1/ATP6V0C/GPR89B                                                                                                                          | 5  |
| BP | GO:2001258 | negative regulation of cation channel activity                                                                                          | 5/632  | 50/17293  | 0.03518308 | 0.50365477 | GPR35/REM2/KCNE3/GSTM2/CLIC2                                                                                                                                   | 5  |
| BP | GO:0031960 | response to corticosteroid                                                                                                              | 11/632 | 162/17293 | 0.03577087 | 0.50732328 | SERPINF1/HSD11B2/EDN1/AREG/ABCB4/ABCC2/BCHE/OSB/IL6/SLIT3/UCN                                                                                                  | 11 |
| BP | GO:0045621 | positive regulation of lymphocyte differentiation                                                                                       | 7/632  | 85/17293  | 0.03579975 | 0.50732328 | VNN1/NCKAP1L/NLRP3/INPP5D/IL6/IL7/IL12A                                                                                                                        | 7  |
| BP | GO:0045778 | positive regulation of ossification                                                                                                     | 7/632  | 85/17293  | 0.03579975 | 0.50732328 | ADRB2/IFITM1/TMEM119/SFRP2/IL6/OSR2/TP63                                                                                                                       | 7  |
| BP | GO:0034765 | regulation of ion transmembrane transport                                                                                               | 24/632 | 443/17293 | 0.0360714  | 0.50946323 | GPR35/ADRB2/CXCL11/REM2/KCND1/KCNG2/KCNE3/KCNQ5/CEMIP/ANO1/JPH2/KEL/SCN1A/SCN3B/SCN3A/GSTM2/GRIN2C/GRIN2D/GRIN3A/HAP1/CLIC6/CLIC2/CATSPER1/GPR89B              | 24 |
| BP | GO:0001501 | skeletal system development                                                                                                             | 26/632 | 490/17293 | 0.0372872  | 0.51937697 | HAPLN3/COL19A1/TRPV4/RBP4/TMEM119/VKORC1/INH A/EDN1/PTHLH/SFRP2/SHOX/SOX5/OSR2/NOG/SPNS2/CHI3L1/WFIKKN1/GHRL/TP63/SULF1/TNFRSF11B/PITX1/HHIP/HOXD4/MATN3/ITGB8 | 26 |
| BP | GO:0003341 | cilium movement                                                                                                                         | 6/632  | 68/17293  | 0.03766284 | 0.51937697 | SPAG17/DNAH5/DNAH17/CFAP46/CFAP53/CATSPER1                                                                                                                     | 6  |
| BP | GO:0070192 | chromosome organization involved in meiotic cell cycle                                                                                  | 6/632  | 68/17293  | 0.03766284 | 0.51937697 | SYCE1/SYCP2/HORMAD1/MEIOC/CCNE2/RAD21L1                                                                                                                        | 6  |
| BP | GO:0002369 | T cell cytokine production                                                                                                              | 4/632  | 35/17293  | 0.03776786 | 0.51937697 | SLC11A1/NLRP3/IL6/IL12A                                                                                                                                        | 4  |
| BP | GO:0071549 | cellular response to dexamethasone stimulus                                                                                             | 4/632  | 35/17293  | 0.03776786 | 0.51937697 | SERPINF1/ABCB4/ABCC2/IL6                                                                                                                                       | 4  |
| BP | GO:0090207 | regulation of triglyceride metabolic process                                                                                            | 4/632  | 35/17293  | 0.03776786 | 0.51937697 | C3/AADAC/APOE/NR1H3                                                                                                                                            | 4  |
| BP | GO:1901019 | regulation of calcium ion transmembrane transporter activity                                                                            | 7/632  | 86/17293  | 0.0377969  | 0.51937697 | GPR35/REM2/KCNE3/JPH2/GSTM2/HAP1/CLIC2                                                                                                                         | 7  |
| BP | GO:0045851 | pH reduction                                                                                                                            | 5/632  | 51/17293  | 0.03788021 | 0.51937697 | ATP6V1C2/RAB38/SLC11A1/ATP6V0C/GPR89B                                                                                                                          | 5  |
| BP | GO:0060425 | lung morphogenesis                                                                                                                      | 5/632  | 51/17293  | 0.03788021 | 0.51937697 | CELSR1/LIF/NOG/ESRP2/HHIP                                                                                                                                      | 5  |
| BP | GO:0002822 | regulation of adaptive immune response based on somatic recombination of immune receptors built from immunoglobulin superfamily domains | 9/632  | 124/17293 | 0.03814375 | 0.52129796 | C3/SLC11A1/TNFRSF13/IL1B/NLRP3/IL6/HAVCR2/TNFRSF13C/IL12A                                                                                                      | 9  |
| BP | GO:0009914 | hormone transport                                                                                                                       | 18/632 | 312/17293 | 0.03840125 | 0.52312418 | EXOC3L1/TRPV4/RBP4/IL1B/INHA/EDN1/KCNG2/ANO1/RAPGEF4/ABCB4/ABCC2/ACVR1C/IL6/LIF/REN/UCN/GHRL/SMPD3                                                             | 18 |
| BP | GO:0070665 | positive regulation of leukocyte proliferation                                                                                          | 10/632 | 144/17293 | 0.03867799 | 0.52519983 | IL1B/EBI3/CARD11/NCKAP1L/IL6/IL7/HAVCR2/TNFRSF13C/CD274/IL12A                                                                                                  | 10 |

|    |            |                                                                                        |        |           |            |            |                                                                                                                                                            |    |
|----|------------|----------------------------------------------------------------------------------------|--------|-----------|------------|------------|------------------------------------------------------------------------------------------------------------------------------------------------------------|----|
| BP | GO:0052547 | regulation of peptidase activity                                                       | 23/632 | 424/17293 | 0.03907048 | 0.52584609 | C3/SERPINE3/SERPINF1/PAPLN/TNFSF10/SERPINB12/BIR<br>C3/SFRP2/SOX2/NLRC4/NLRP3/A2M/ACV1C/IL6/WFIKK<br>N1/COL4A3/SFN/SPINT2/SPINT1/TP63/IFI27/EPHA7/HM<br>SD | 23 |
| BP | GO:0006067 | ethanol metabolic process                                                              | 3/632  | 21/17293  | 0.03959722 | 0.52584609 | SULT1A1/SULT1C4/ALDH1A1                                                                                                                                    | 3  |
| BP | GO:0006144 | purine nucleobase metabolic process                                                    | 3/632  | 21/17293  | 0.03959722 | 0.52584609 | ACPP/ADA2/GDA                                                                                                                                              | 3  |
| BP | GO:0009595 | detection of biotic stimulus                                                           | 3/632  | 21/17293  | 0.03959722 | 0.52584609 | NLRC4/NLRP3/TLR1                                                                                                                                           | 3  |
| BP | GO:0014821 | phasic smooth muscle contraction                                                       | 3/632  | 21/17293  | 0.03959722 | 0.52584609 | PTGER3/EDN1/GHRL                                                                                                                                           | 3  |
| BP | GO:0042094 | interleukin-2 biosynthetic process                                                     | 3/632  | 21/17293  | 0.03959722 | 0.52584609 | IL1A/IL1B/CARD11                                                                                                                                           | 3  |
| BP | GO:0048305 | immunoglobulin secretion                                                               | 3/632  | 21/17293  | 0.03959722 | 0.52584609 | RBP4/POU2F2/IL6                                                                                                                                            | 3  |
| BP | GO:0003012 | muscle system process                                                                  | 24/632 | 448/17293 | 0.04023078 | 0.53258486 | CHRNE/ADRB2/DSC2/PTGER3/IL1B/RGS2/TNNC1/EDN1/<br>KCNE3/LMOD1/SCN1A/SCN3B/SPX/C12orf57/UCN/P2R<br>X6/GHRL/SULF1/MIR25/GSTM2/IGFBP5/CNN1/ACTA2/C<br>LIC2     | 24 |
| BP | GO:0010524 | positive regulation of calcium ion<br>transport into cytosol                           | 5/632  | 52/17293  | 0.04070044 | 0.53506368 | CXCL11/CEMIP/JPH2/GSTM2/HAP1                                                                                                                               | 5  |
| BP | GO:0046635 | positive regulation of alpha-beta T cell<br>activation                                 | 5/632  | 52/17293  | 0.04070044 | 0.53506368 | EBI3/NCKAP1L/NLRP3/IL6/IL12A                                                                                                                               | 5  |
| BP | GO:0043281 | regulation of cysteine-type<br>endopeptidase activity involved in<br>apoptotic process | 13/632 | 207/17293 | 0.04101473 | 0.53506368 | TNFSF10/BIRC3/SFRP2/SOX2/NLRC4/NLRP3/ACV1C/IL6<br>/COL4A3/SFN/TP63/IFI27/EPHA7                                                                             | 13 |
| BP | GO:0007548 | sex differentiation                                                                    | 16/632 | 271/17293 | 0.04111248 | 0.53506368 | TNFSF10/RBP4/INHA/EREG/RXFP2/ESR1/SFRP2/DACH1/<br>AMH/PCYT1B/ANKRD7/SYCP2/REN/SLIT3/TP63/RAD21L<br>1                                                       | 16 |
| BP | GO:0045823 | positive regulation of heart contraction                                               | 4/632  | 36/17293  | 0.04130494 | 0.53506368 | RGS2/EDN1/SCN3B/UCN                                                                                                                                        | 4  |
| BP | GO:0046460 | neutral lipid biosynthetic process                                                     | 4/632  | 36/17293  | 0.04130494 | 0.53506368 | C3/AGMO/NR1H3/GPAT2                                                                                                                                        | 4  |
| BP | GO:0046463 | acylglycerol biosynthetic process                                                      | 4/632  | 36/17293  | 0.04130494 | 0.53506368 | C3/AGMO/NR1H3/GPAT2                                                                                                                                        | 4  |
| BP | GO:0048771 | tissue remodeling                                                                      | 11/632 | 166/17293 | 0.04152168 | 0.5362265  | ADRB2/IL1A/WNT16/FLT4/INPP5D/ERG/IL6/IL7/LIF/TNFR<br>SF11B/IGFBP5                                                                                          | 11 |
| BP | GO:0045132 | meiotic chromosome segregation                                                         | 7/632  | 88/17293  | 0.04200736 | 0.54084478 | SYCE1/SYCP2/HORMAD1/MEIOC/HFM1/CCNE2/RAD21L<br>1                                                                                                           | 7  |
| BP | GO:0032722 | positive regulation of chemokine<br>production                                         | 5/632  | 53/17293  | 0.04364459 | 0.54407818 | TRPV4/IL1A/IL1B/IL6/HAVCR2                                                                                                                                 | 5  |
| BP | GO:0046928 | regulation of neurotransmitter secretion                                               | 5/632  | 53/17293  | 0.04364459 | 0.54407818 | SNCAIP/GRIK5/PPP1R9A/RIMS1/RIMS3                                                                                                                           | 5  |
| BP | GO:0072523 | purine-containing compound catabolic<br>process                                        | 5/632  | 53/17293  | 0.04364459 | 0.54407818 | ADA2/NUDT7/ENPP4/GDA/PDE4C                                                                                                                                 | 5  |
| BP | GO:0000041 | transition metal ion transport                                                         | 8/632  | 108/17293 | 0.04428493 | 0.54407818 | ATP6V1C2/SLC11A1/TRPC4/SLC40A1/SCO2/ABCC2/ATP<br>6VOC/MELTF                                                                                                | 8  |
| BP | GO:0035590 | purinergic nucleotide receptor signaling<br>pathway                                    | 3/632  | 22/17293  | 0.04464178 | 0.54407818 | P2RY6/P2RY2/P2RX6                                                                                                                                          | 3  |
| BP | GO:0035812 | renal sodium excretion                                                                 | 3/632  | 22/17293  | 0.04464178 | 0.54407818 | EDN1/SPX/CORIN                                                                                                                                             | 3  |
| BP | GO:0035813 | regulation of renal sodium excretion                                                   | 3/632  | 22/17293  | 0.04464178 | 0.54407818 | EDN1/SPX/CORIN                                                                                                                                             | 3  |
| BP | GO:0051480 | regulation of cytosolic calcium ion<br>concentration                                   | 18/632 | 318/17293 | 0.04481889 | 0.54407818 | GPR35/CXCL11/CHRNA10/TRPC4/TRPV4/LPAR2/EDN1/R<br>XFP3/ESR1/CEMIP/JPH2/GHRL/GSTM2/GRIN2C/GRIN2D/<br>HAP1/CLIC2/CCR10                                        | 18 |
| BP | GO:0019226 | transmission of nerve impulse                                                          | 6/632  | 71/17293  | 0.04504013 | 0.54407818 | GPR35/IL6/SCN1A/SCN3A/GHRL/NFASC                                                                                                                           | 6  |
| BP | GO:0001819 | positive regulation of cytokine<br>production                                          | 22/632 | 408/17293 | 0.04525285 | 0.54407818 | C3/SLC11A1/TRPV4/IL1A/IL1B/RGCC/EBI3/BIRC3/CARD1<br>1/EREG/NLRP3/FLT4/IL6/UCN/TLR1/SULF1/HAVCR2/TNF<br>RSF13C/CCL20/GPRC5B/CD274/IL12A                     | 22 |
| BP | GO:0030810 | positive regulation of nucleotide<br>biosynthetic process                              | 8/632  | 109/17293 | 0.04633577 | 0.54407818 | MC1R/ADRB2/RAMP1/PTHLH/RXFP2/APOE/UCN/ADCY8                                                                                                                | 8  |

|    |            |                                                                         |        |           |            |            |                                                                                                    |    |
|----|------------|-------------------------------------------------------------------------|--------|-----------|------------|------------|----------------------------------------------------------------------------------------------------|----|
| BP | GO:1900373 | positive regulation of purine nucleotide biosynthetic process           | 8/632  | 109/17293 | 0.04633577 | 0.54407818 | MC1R/ADRB2/RAMP1/PTHLH/RXFP2/APOE/UCN/ADCY8                                                        | 8  |
| BP | GO:0015748 | organophosphate ester transport                                         | 7/632  | 90/17293  | 0.0465106  | 0.54407818 | TMEM30B/APOE/MFSD2A/ABCB4/CETP/PITPNM3/ATP10B                                                      | 7  |
| BP | GO:0046513 | ceramide biosynthetic process                                           | 5/632  | 54/17293  | 0.04671326 | 0.54407818 | ST8SIA4/B3GALT2/B3GALT1/B4GALNT1/SMPD3                                                             | 5  |
| BP | GO:2001259 | positive regulation of cation channel activity                          | 5/632  | 54/17293  | 0.04671326 | 0.54407818 | ADRB2/KCNE3/JPH2/GSTM2/HAP1                                                                        | 5  |
| BP | GO:0002673 | regulation of acute inflammatory response                               | 10/632 | 149/17293 | 0.04696164 | 0.54407818 | C3/C6/C7/PTGER3/IL1B/NLRP3/A2M/C1R/IL6/CPB2                                                        | 10 |
| BP | GO:0006766 | vitamin metabolic process                                               | 9/632  | 129/17293 | 0.04709553 | 0.54407818 | VNN1/RBP1/IL1B/VKORC1/SLC19A3/ACPP/CYP11A1/CYP1A1/LRAT                                             | 9  |
| BP | GO:0007292 | female gamete generation                                                | 9/632  | 129/17293 | 0.04709553 | 0.54407818 | PAQR5/EREG/RXFP2/AMH/SYCP2/HORMAD1/PIWIL2/PLD6/MEIOC                                               | 9  |
| BP | GO:0060048 | cardiac muscle contraction                                              | 9/632  | 129/17293 | 0.04709553 | 0.54407818 | DSC2/RGS2/TNNC1/KCNE3/SCN1A/SCN3B/UCN/GSTM2/CLIC2                                                  | 9  |
| BP | GO:0098661 | inorganic anion transmembrane transport                                 | 9/632  | 129/17293 | 0.04709553 | 0.54407818 | ANO1/ABCC2/ABCC6/ABCC9/SLC34A3/GABRA2/GABRA5/CLIC6/CLIC2                                           | 9  |
| BP | GO:0006959 | humoral immune response                                                 | 18/632 | 320/17293 | 0.04711988 | 0.54407818 | C3/C6/C7/TREM1/SLC11A1/RGCC/EBI3/POU2F2/A2M/C1R/IL6/IL7/SPNS2/CXCL6/HIST1H2BG/HIST1H2BC/CPB2/MASP1 | 18 |
| BP | GO:0050730 | regulation of peptidyl-tyrosine phosphorylation                         | 14/632 | 233/17293 | 0.04755292 | 0.54407818 | DMTN/TMEM102/EREG/SFRP2/NRG1/AREG/SAMSN1/IL6/LIF/GHRL/CSF3/GPRC5B/EPHA7/IL12A                      | 14 |
| BP | GO:0003208 | cardiac ventricle morphogenesis                                         | 6/632  | 72/17293  | 0.04768541 | 0.54407818 | TNNC1/SFRP2/NRG1/NOG/HEYL/PROX1                                                                    | 6  |
| BP | GO:0006942 | regulation of striated muscle contraction                               | 7/632  | 91/17293  | 0.04887351 | 0.54407818 | DSC2/RGS2/KCNE3/C12orf57/UCN/GSTM2/CLIC2                                                           | 7  |
| BP | GO:0001990 | regulation of systemic arterial blood pressure by hormone               | 4/632  | 38/17293  | 0.04892218 | 0.54407818 | HSD11B2/EDN1/REN/CORIN                                                                             | 4  |
| BP | GO:0030225 | macrophage differentiation                                              | 4/632  | 38/17293  | 0.04892218 | 0.54407818 | TRIB1/INHA/LIF/CSF3                                                                                | 4  |
| BP | GO:0032715 | negative regulation of interleukin-6 production                         | 4/632  | 38/17293  | 0.04892218 | 0.54407818 | NCKAP1L/INPP5D/GHRL/HAVCR2                                                                         | 4  |
| BP | GO:0050850 | positive regulation of calcium-mediated signaling                       | 4/632  | 38/17293  | 0.04892218 | 0.54407818 | NRG1/JPH2/GSTM2/HAP1                                                                               | 4  |
| BP | GO:1901020 | negative regulation of calcium ion transmembrane transporter activity   | 4/632  | 38/17293  | 0.04892218 | 0.54407818 | GPR35/REM2/GSTM2/CLIC2                                                                             | 4  |
| BP | GO:0006828 | manganese ion transport                                                 | 2/632  | 10/17293  | 0.04940232 | 0.54407818 | SLC11A1/TRPC4                                                                                      | 2  |
| BP | GO:0010739 | positive regulation of protein kinase A signaling                       | 2/632  | 10/17293  | 0.04940232 | 0.54407818 | MC1R/ADRB2                                                                                         | 2  |
| BP | GO:0016102 | diterpenoid biosynthetic process                                        | 2/632  | 10/17293  | 0.04940232 | 0.54407818 | RBP1/CYP1A1                                                                                        | 2  |
| BP | GO:0030259 | lipid glycosylation                                                     | 2/632  | 10/17293  | 0.04940232 | 0.54407818 | B3GALT1/B4GALNT1                                                                                   | 2  |
| BP | GO:0031652 | positive regulation of heat generation                                  | 2/632  | 10/17293  | 0.04940232 | 0.54407818 | PTGER3/IL1B                                                                                        | 2  |
| BP | GO:0032494 | response to peptidoglycan                                               | 2/632  | 10/17293  | 0.04940232 | 0.54407818 | NLRP3/IL6                                                                                          | 2  |
| BP | GO:0032836 | glomerular basement membrane development                                | 2/632  | 10/17293  | 0.04940232 | 0.54407818 | COL4A3/SULF1                                                                                       | 2  |
| BP | GO:0035878 | nail development                                                        | 2/632  | 10/17293  | 0.04940232 | 0.54407818 | ITGB4/ITGA6                                                                                        | 2  |
| BP | GO:0042178 | xenobiotic catabolic process                                            | 2/632  | 10/17293  | 0.04940232 | 0.54407818 | GSTM2/CYP1A1                                                                                       | 2  |
| BP | GO:0042756 | drinking behavior                                                       | 2/632  | 10/17293  | 0.04940232 | 0.54407818 | REN/UCN                                                                                            | 2  |
| BP | GO:0043031 | negative regulation of macrophage activation                            | 2/632  | 10/17293  | 0.04940232 | 0.54407818 | ADGRF5/NR1H3                                                                                       | 2  |
| BP | GO:0045792 | negative regulation of cell size                                        | 2/632  | 10/17293  | 0.04940232 | 0.54407818 | UCN/DEPTOR                                                                                         | 2  |
| BP | GO:0050966 | detection of mechanical stimulus involved in sensory perception of pain | 2/632  | 10/17293  | 0.04940232 | 0.54407818 | ASIC3/SCN1A                                                                                        | 2  |
| BP | GO:0060068 | vagina development                                                      | 2/632  | 10/17293  | 0.04940232 | 0.54407818 | RBP4/ESR1                                                                                          | 2  |
| BP | GO:0060600 | dichotomous subdivision of an epithelial terminal unit                  | 2/632  | 10/17293  | 0.04940232 | 0.54407818 | CELSR1/AREG                                                                                        | 2  |

|    |            |                                                                                  |        |           |            |            |                                                                                                                                                   |    |
|----|------------|----------------------------------------------------------------------------------|--------|-----------|------------|------------|---------------------------------------------------------------------------------------------------------------------------------------------------|----|
| BP | GO:0071600 | otic vesicle morphogenesis                                                       | 2/632  | 10/17293  | 0.04940232 | 0.54407818 | HESX1/PROX1                                                                                                                                       | 2  |
| BP | GO:0101023 | vascular endothelial cell proliferation                                          | 2/632  | 10/17293  | 0.04940232 | 0.54407818 | GHRL/MIR132                                                                                                                                       | 2  |
| BP | GO:1905562 | regulation of vascular endothelial cell proliferation                            | 2/632  | 10/17293  | 0.04940232 | 0.54407818 | GHRL/MIR132                                                                                                                                       | 2  |
| BP | GO:1990001 | inhibition of cysteine-type endopeptidase activity involved in apoptotic process | 2/632  | 10/17293  | 0.04940232 | 0.54407818 | BIRC3/NLRC4                                                                                                                                       | 2  |
| BP | GO:2000551 | regulation of T-helper 2 cell cytokine production                                | 2/632  | 10/17293  | 0.04940232 | 0.54407818 | NLRP3/IL6                                                                                                                                         | 2  |
| BP | GO:0050870 | positive regulation of T cell activation                                         | 13/632 | 213/17293 | 0.04953734 | 0.54407818 | VNN1/IL1B/EBI3/CARD11/NCKAP1L/NLRP3/IL6/IL7/EFNB3/HAVCR2/TNFRSF13C/CD274/IL12A                                                                    | 13 |
| BP | GO:0030324 | lung development                                                                 | 11/632 | 171/17293 | 0.04957032 | 0.54407818 | RBP4/HSD11B1/CELSR1/FLT4/LIF/NOG/CHI3L1/ESRP2/IGFBP5/HHIP/PROX1                                                                                   | 11 |
| BP | GO:0140013 | meiotic nuclear division                                                         | 11/632 | 171/17293 | 0.04957032 | 0.54407818 | FBXO43/EREG/SYCE1/SYCP2/LIF/HORMAD1/PIWIL2/MEIOX/HFM1/CCNE2/RAD21L1                                                                               | 11 |
| BP | GO:0034762 | regulation of transmembrane transport                                            | 24/632 | 458/17293 | 0.04959857 | 0.54407818 | GPR35/ADRB2/CXCL11/REM2/KCND1/KCNG2/KCNE3/KCNQ5/CEMIP/ANO1/JPH2/KEL/SCN1A/SCN3B/SCN3A/GSTM2/GRIN2C/GRIN2D/GRIN3A/HAP1/CLIC6/CLIC2/CATSPER1/GPR89B | 24 |
| BP | GO:0048635 | negative regulation of muscle organ development                                  | 5/632  | 55/17293  | 0.04990689 | 0.54407818 | RBP4/IL6/NOG/TLL2/MIR25                                                                                                                           | 5  |
| BP | GO:1901862 | negative regulation of muscle tissue development                                 | 5/632  | 55/17293  | 0.04990689 | 0.54407818 | RBP4/NOG/TLL2/MIR25/IGFBP5                                                                                                                        | 5  |
| BP | GO:0021952 | central nervous system projection neuron axonogenesis                            | 3/632  | 23/17293  | 0.04998871 | 0.54407818 | DCC/C12orf57/PLXNA4                                                                                                                               | 3  |
| BP | GO:0031639 | plasminogen activation                                                           | 3/632  | 23/17293  | 0.04998871 | 0.54407818 | CLEC3B/MELTF/CPB2                                                                                                                                 | 3  |
| BP | GO:0042573 | retinoic acid metabolic process                                                  | 3/632  | 23/17293  | 0.04998871 | 0.54407818 | RBP1/CYP1A1/LRAT                                                                                                                                  | 3  |
| BP | GO:0042832 | defense response to protozoan                                                    | 3/632  | 23/17293  | 0.04998871 | 0.54407818 | SLC11A1/IL6/IL12A                                                                                                                                 | 3  |
| BP | GO:0097186 | amelogenesis                                                                     | 3/632  | 23/17293  | 0.04998871 | 0.54407818 | ENAM/ITGB4/ITGA6                                                                                                                                  | 3  |
